# Supplementary material for: cfGWAS reveal genetic basis of cell-free DNA features
Source: Research Square preprint supplement (doi:10.21203/rs.3.rs-5192887/v1), 2024-11-08
Supplement: Supplementary file 1 [file 5d3580408073faa1c31e0fa3.xlsx]

## Sheet: Table S1
Table S1. 84 Genome-wide significant loci associated with cfDNA motif frequencies in GWAS analysis
Locus info														Top SNP info
CHR	Locus_start_pos (bp)	Locus_end_pos (bp)	Mapped_gene	Defined_locus_name	Locus_length (bp)	SNP_count	Significant_motif_start	Number of significant motif start with A	Number of significant motif start with C	Number of significant motif start with G	Number of significant motif start with T	Total number of significant motifs	Significant motifs	Lead_SNP	Top_snp_CHR	Top_snp_POS	A1	A2	Beta	SE	T_stat	P	Top_SNP_Motif
11	93844839	94640988	PANX1; IZUMO1R; MRE11; FUT4; C11orf97; PIWIL4; HEPHL1; GPR83; LINC02700; HPRT1P3; ANKRD49; VSTM5	PANX1	796150	372	A; C; G; T	41	35	30	39	145	TGGG; CTCT; TCCC; CATT; CCTT; TATT; TCAG; CAAG; TGAC; TAGA; AAGC; GAGG; TATC; CGAG; TCCT; TCAC; AAAA; CTTT; CACG; AGAT; ACAT; GTCG; CTCG; GTTC; TAGC; TGAG; TGGC; GTCC; ATCG; ACTT; AGGG; AGTC; ATCT; GTAT; AGCT; CGTA; CGAA; TGGA; TGGT; ATAT; TAGT; CACT; TGAA; GACT; CCAG; TGCT; CGGA; TGTC; ACTC; AGCC; GAAT; ACCA; ATCC; GGTT; GAGA; GCTA; CCAA; GATA; AACC; AGTA; TAAT; CGAT; GTGA; TGTG; GTCA; TACC; ACC…	rs76201528	11	94148160	C	G	2.11569	0.0521172	40.5948	3.93E-350	ACTT
1	3769207	3939752	LINC01134; SMIM1; LRRC47; CEP104; LINC01346; C1orf174; DFFB; CCDC27	DFFB	170546	103	A; C; G; T	42	35	26	40	143	CTCT; TCCC; CATT; CCTT; TATT; TCAG; CAAG; TGAC; TAGA; AAGC; TATC; CGAG; TTCC; TCCT; TCAC; AAAA; CTTT; CACG; CTAG; CACA; AGAT; ACAT; GTCG; CTCG; TCTG; GTTC; TAGC; TGAG; GTCC; ATCG; GCCG; ACTT; ATAC; AGTC; ATCT; GTAT; AGCT; CGTA; CGAA; TGGA; TGGT; ATAT; TAGT; CACT; TGAA; GACT; ATGC; CCAG; TGCT; CGGA; TGTC; ACTC; AGCC; ACCA; ATCC; GGTT; GAGA; CCAA; GATA; AACC; AGTA; TAAT; CGAT; GTGA; TGTG; GTCA; TAC…	rs74752626	1	3875004	A	G	0.440604	0.0121593	36.236	5.14e-281	ATCG
16	46388624	46448674	ANKRD26P1	ANKRD26P1	60051	6	A; C; G; T	5	16	14	4	39	CTCT; CATT; CCTT; TATT; CACT; CGTT; CCTC; GAGG; CTCC; GATG; GAAA; ATTT; CATC; CTTC; ACAA; GACA; GTTT; TGTC; AAAG; AACG; GAAT; CTTT; GCAA; CCAT; CACC; CCCA; TGAT; GAGA; GGAG; CTTG; CCTG; GTCT; CCCT; GGAA; GTTC; ATCG; GAAC; TGTT; GAAG	rs9925888	16	46389526	A	T	0.959205	0.116503	8.23329	1.9e-16	GAAA
3	58066390	58516981	ACOX2; FLNB; ABHD6; KCTD6; PXK; RPP14; DNASE1L3; PDHB	DNASE1L3	450592	163	A; C; G; T	10	2	13	9	34	GTTA; GTGC; GTAC; TTCA; ATTC; ACAA; TTCC; GTTT; TTCT; ACCA; CCAA; ACAC; GTCT; CCTG; ACAT; GTAA; GTTG; GTGA; GTCA; TTTA; ATTG; GTGT; GTTC; TAGC; ACTG; TACC; GTCC; ACCT; ACAG; ACCC; GTAT; TTTT; TTTG; TTTC	rs12633655	3	58320594	T	C	-0.11929	0.0102831	-11.6006	4.82e-31	ACCA
17	39964483	40082472	GSDMA; CSF3; PSMD3; MED24; THRA	PSMD3	117990	42	A; C; T	4	5	0	20	29	TTAG; TTAA; TTAC; TTCA; CATG; TTGG; TTCC; TTAT; TTCT; CCCA; TCGC; CCAA; TTCG; TTGA; TCGT; AACC; CGAT; AGTG; TTTA; TCGA; ATCG; TCGG; TTGT; TTGC; TTTT; TTTG; CGTA; TTTC; ACGT	rs8078723	17	40010626	C	T	-0.0793685	0.00900411	-8.8147	1.27e-18	TTCG
5	72699700	73111018	TMEM171; FCHO2; TNPO1; RPL7P22	FCHO2	411319	60	A; C; G	4	16	4	0	24	GTTA; ATGG; CAGG; CTCA; CAAG; CTGC; ATGC; CCGA; CTGA; CTAC; GAAT; CACG; CCGG; CTAG; CTGG; CCGC; ATAG; GATA; GATT; CTGT; CTCG; CAGA; CCGT; AGGC	rs3911450	5	73030617	A	G	-0.0703761	0.0092674	-7.59395	3.2e-14	CTGG
1	17263740	17339600	PADI4; PADI3	PADI4	75861	67	A; C; G; T	4	9	6	2	21	TCCG; CAAT; ACGC; CAAG; GTGC; CATG; ACGA; GACG; CAAC; CCAT; TCGC; CCGG; CCAA; CCGC; GCGC; GTGT; ACGG; CCGT; GCGG; GCGT; ACGT	rs1886301	1	17308916	G	A	-0.0761075	0.00955802	-7.96269	1.75e-15	CCAA
3	110498827	110498827	RNU6ATAC15P	RNU6ATAC15P	1	1	A; C; G; T	7	6	1	4	18	CCGC; TTCA; ACGA; ACGG; ATGG; TTCC; CCGT; AGGT; ACGC; TCGG; CCGA; TTCT; GATC; CGTA; CCGG; ATGC; ACGT; CTGG	rs144504938	3	110498827	T	C	0.39351	0.0518189	7.59395	3.2e-14	CCGT
19	35158291	35208686	FXYD5; FAM187B	FXYD5	50396	7	A; G	10	0	4	0	14	GTCT; ATCG; ACCT; ACTT; AGTT; ACCG; ACTC; AACG; ATCT; GATT; AGCT; GCTT; GACT; ACTG	rs1633913	19	35194212	C	A	0.199179	0.0234755	8.48452	2.27e-17	ACCG
9	133233778	133279427	ABO; LCN1P1	ABO	45650	27	C; T	0	4	0	9	13	CGCT; TGCA; TGCT; CGCA; TGCC; TTAT; CGAT; TGAT; TTTA; TGAA; TGTT; TGAC; CGAA	rs977371848	9	133266456	T	C	-0.0890667	0.0113565	-7.84282	4.56e-15	CGAA
11	55720854	55761798	OR5D17P; OR5D3P	OR5D17P	40945	6	A; C; G; T	4	3	2	3	12	GACA; ACGA; TTCC; CCGT; CTGC; ACGC; GGTA; CCGA; TTCT; TTCA; ATGC; ACGT	rs28772876	11	55761798	C	T	0.262938	0.0374974	7.01216	2.4e-12	CCGT
12	480709	480709	B4GALNT3	B4GALNT3	1	1	A; C; G	7	3	1	0	11	AGGC; ATAG; CTGG; GTTA; ATGG; CTGA; AGGT; AGAG; ATGC; CTAG; AGGA	rs56279417	12	480709	C	G	-0.181074	0.0276179	-6.55642	5.61e-11	ATAG
X	154316155	154527775	EMD; TAZ; FAM3A; TKTL1; FLNA; G6PD; SLC10A3; DNASE1L1; RPL10	DNASE1L1	211621	50	G	0	0	10	0	10	GTCT; GTAA; GTTG; GTGA; GTGG; GTCA; GTAT; GTGT; GTGC; GTAC	rs2283762	X	154403855	G	T	0.203532	0.0198785	10.2388	1.47e-24	GTGT
11	50407136	50412126	LINC02750	LINC02750	4991	2	A; C; T	1	3	0	4	8	TTCC; CCGT; TCGG; ACGC; TTCT; TCGC; CCGG; CCGA	rs140544819	11	50407136	C	T	0.320577	0.047763	6.71183	1.96e-11	CCGT
8	112459362	112459362	CSMD3	CSMD3	1	1	A; C	3	4	0	0	7	ACGA; CCGT; ACGC; CCGA; CGTA; CCGG; ACGT	rs201406743	8	112459362	T	G	0.332133	0.0459553	7.2273	5.05e-13	CCGT
8	105503480	105546007	ZFPM2	ZFPM2	42528	9	A; G	4	0	2	0	6	ACCT; ACTT; ACCG; ACTC; GATT; GCTT	rs16873365	8	105546007	T	C	0.0778778	0.0118737	6.55887	5.52e-11	ACTT
7	99648291	99776026	CYP3A4; CYP3A5; CYP3A7-CYP3A51P; CYP3A51P; CYP3A7	CYP3A4	127736	24	C	0	6	0	0	6	CTGA; CTGC; CCGA; CTGT; CTAG; CTGG	rs1851427	7	99698250	A	G	0.0672226	0.0102818	6.53805	6.34e-11	CTGA
19	3458402	3575738	SMIM24; HMG20B; NFIC	NFIC	117337	5	G	0	0	5	0	5	GTTG; GTGA; GTGG; GTGT; GTAC	rs76924046	19	3458402	C	A	0.188014	0.0240475	7.81847	5.53e-15	GTGT
8	16154684	16200215	MSR1	MSR1	45532	27	A; C; G	1	1	3	0	5	GTCT; ACTT; GTTT; GATT; CGAA	rs383836	8	16183123	T	C	0.0739669	0.0111103	6.65751	2.84e-11	CGAA
4	95690307	95690307	RPL30P6	RPL30P6	1	1	A; C	1	4	0	0	5	ACGA; CCGT; CGTA; CCGG; CCGA	rs1369986	4	95690307	G	A	0.311324	0.0482729	6.44925	1.14e-10	CCGG
2	70183395	70327424	MIR1285-2; PCYOX1; C2orf42; SNRPG; FAM136A; TIA1	C2orf42	144030	68	A; C	1	4	0	0	5	CTGA; AGGT; CTGT; CTAG; CTGG	rs9753484	2	70193485	A	T	0.15698	0.0265915	5.90339	3.6e-09	CTGA
21	10458824	10464697	BAGE2	BAGE2	5874	2	C; G	0	1	4	0	5	CATT; GCTG; GCCA; GGTG; GGAG	rs2740310	21	10458824	G	T	-0.262811	0.0456462	-5.75756	8.62e-09	GCCA
3	162981822	162981822	LINC01192	LINC01192	1	1	C	0	4	0	0	4	CGTA; CCGT; CGTG; CCGA	rs9283621	3	162981822	A	T	0.301982	0.0427931	7.05679	1.74e-12	CCGT
8	6956761	7014687	DEFA1; DEFA9P; DEFA3	DEFA1	57927	4	G	0	0	4	0	4	GTAC; GTAT; GTGT; GTTA	rs112580300	8	6974339	T	C	0.476546	0.0763065	6.24516	4.29e-10	GTAT
11	7079462	7079462	NLRP14	NLRP14	1	1	A; C; T	1	1	0	2	4	CGTA; ATGC; TTCC; TTCT	rs7116355	11	7079462	T	A	-0.425558	0.0697591	-6.10039	1.07e-09	CGTA
4	127264913	127264913	Y_RNA	Y_RNA	1	1	C	0	4	0	0	4	CCGC; CCGT; CCGG; CCGA	rs186210045	4	127264913	T	C	0.378514	0.0621646	6.08891	1.15e-09	CCGA
4	150525363	150525363	LRBA	LRBA	1	1	C	0	4	0	0	4	CCGC; CCGT; CCGG; CCGA	rs77511286	4	150525363	T	C	0.237148	0.0417001	5.68698	1.31e-08	CCGC
5	144775767	144775767	NAMPTP2	NAMPTP2	1	1	C	0	3	0	0	3	CCGC; CCGT; CCGA	rs189329024	5	144775767	C	T	-1.30099	0.188026	-6.91921	4.64e-12	CCGT
1	199001286	199045484	LINC01221; LINC01222	LINC01221	44199	3	A; G	1	0	2	0	3	GACT; ACCG; GACG	rs76947260	1	199045484	T	C	-0.240945	0.0348559	-6.9126	4.86e-12	ACCG
10	79178742	79178742	ZMIZ1	ZMIZ1	1	1	A	3	0	0	0	3	ATCT; ATCG; AGCT	rs16937003	10	79178742	A	G	-0.146778	0.0234543	-6.25805	3.95e-10	ATCG
19	56090323	56133542	ZNF787; ZNF444	ZNF787	43220	22	A	3	0	0	0	3	ACCT; ACTT; ACTC	rs524829	19	56111770	G	A	0.058974	0.00958088	6.15538	7.59e-10	ACTT
22	19202512	19202512	CLTCL1	CLTCL1	1	1	G	0	0	3	0	3	GGAG; GGAA; GGGA	rs115795223	22	19202512	T	C	-0.350745	0.05832	-6.01416	1.83e-09	GGGA
10	120229451	120229451	RPL21P16	RPL21P16	1	1	C; T	0	2	0	1	3	TGTA; CCGG; CCGA	rs77355228	10	120229451	C	G	0.558551	0.097753	5.7139	1.12e-08	CCGA
4	49156238	49156238	SNX18P23	SNX18P23	1	1	C	0	3	0	0	3	CTTT; CTTC; CCTT	rs62647854	4	49156238	C	A	-0.58009	0.101668	-5.70571	1.17e-08	CCTT
6	57030031	57030031	MRPL30P1	MRPL30P1	1	1	A	3	0	0	0	3	ACGT; ACGA; ACGG	rs9370556	6	57030031	C	T	0.498532	0.0875019	5.69738	1.23e-08	ACGG
13	55425443	55425443	MIR5007	MIR5007	1	1	C	0	2	0	0	2	CGTA; CCGT	rs2937339	13	55425443	T	C	-0.21315	0.0341868	-6.23487	4.59e-10	CGTA
1	189696550	189696550	RNA5SP73	RNA5SP73	1	1	C	0	2	0	0	2	CCGT; CCGA	rs376459593	1	189696550	C	A	0.567052	0.0932916	6.07828	1.23e-09	CCGT
9	97631340	97631340	TSTD2	TSTD2	1	1	C	0	2	0	0	2	CCGT; CCGA	rs60026475	9	97631340	G	C	0.228074	0.0376428	6.0589	1.39e-09	CCGT
2	89815732	89815732	IGKV2D-40	IGKV2D40	1	1	C; T	0	1	0	1	2	CGTT; TGTT	rs529723778	2	89815732	A	T	-0.480298	0.0799198	-6.00975	1.88e-09	TGTT
10	89788598	89788598	MTND5P42	MTND5P42	1	1	C	0	2	0	0	2	CCGT; CCGA	rs7921787	10	89788598	T	G	0.35082	0.0591377	5.93225	3.02e-09	CCGT
2	18458520	18458520	RDH14	RDH14	1	1	C	0	2	0	0	2	CCGT; CCGA	rs56037562	2	18458520	A	C	0.216169	0.0371369	5.82089	5.92e-09	CCGA
20	4379169	4393056	ADRA1D	ADRA1D	13888	6	G	0	0	2	0	2	GAGA; GAGG	rs4815697	20	4384219	A	G	-0.122916	0.0211209	-5.81962	5.96e-09	GAGA
17	59919445	59919445	RPS6KB1	RPS6KB1	1	1	A; C	1	1	0	0	2	AGGT; CTGG	rs180536	17	59919445	A	G	-0.154729	0.0268509	-5.76254	8.37e-09	CTGG
4	161109220	161109220	FSTL5	FSTL5	1	1	C	0	2	0	0	2	CCGT; CCGA	rs540655985	4	161109220	T	A	0.230503	0.0404843	5.69363	1.26e-08	CCGA
5	148136632	148136632	SPINK5	SPINK5	1	1	A	2	0	0	0	2	ACGA; ACGT	rs4263489	5	148136632	G	C	0.146541	0.0258832	5.6616	1.51e-08	ACGA
12	103918264	103918264	TTC41P	TTC41P	1	1	C	0	2	0	0	2	CGTA; CGTG	rs11111840	12	103918264	T	G	-0.170003	0.0303855	-5.59488	2.23e-08	CGTG
3	103708161	103708161	TUBBP11	TUBBP11	1	1	C; T	0	1	0	1	2	CGTA; TTCC	rs62270763	3	103708161	T	C	-0.201331	0.0360751	-5.58089	2.42e-08	CGTA
8	140676413	140676413	PTK2	PTK2	1	1	G	0	0	2	0	2	GAGA; GAAG	rs564432094	8	140676413	T	A	0.305266	0.0553788	5.51233	3.57e-08	GAGA
13	36263922	36263922	CCDC169	CCDC169	1	1	G; T	0	0	1	1	2	GGTA; TTCC	rs117706434	13	36263922	C	T	-0.394155	0.0720379	-5.4715	4.5e-08	GGTA
2	120254084	120294875	RALB	RALB	40792	38	A	1	0	0	0	1	ACCG	rs3925970	2	120260577	A	C	-0.0595678	0.00973895	-6.11646	9.69e-10	ACCG
7	120905936	120905936	ING3	ING3	1	1	C	0	1	0	0	1	CCGT	rs74379231	7	120905936	T	G	0.218444	0.0361652	6.04018	1.56e-09	CCGT
9	11263274	11263274	AKAP8P1	AKAP8P1	1	1	C	0	1	0	0	1	CGTA	rs10738222	9	11263274	G	A	-0.164921	0.0277568	-5.94164	2.86e-09	CGTA
2	71769105	71769137	DYSF	DYSF	33	3	G	0	0	1	0	1	GACA	rs370904491	2	71769115	C	T	-0.214569	0.0362015	-5.92708	3.12e-09	GACA
4	107490396	107490396	RNU6-551P	RNU6-551P	1	1	C	0	1	0	0	1	CTGT	rs2107017	4	107490396	C	T	-0.459074	0.0786599	-5.83619	5.4e-09	CTGT
8	87693159	87693159	IARS2P1	IARS2P1	1	1	C	0	1	0	0	1	CCGT	rs13265850	8	87693159	T	C	0.224134	0.0384515	5.829	5.64e-09	CCGT
21	45927331	45927331	PCBP3	PCBP3	1	1	G	0	0	1	0	1	GATC	rs552504852	21	45927331	C	T	-0.533175	0.0919223	-5.80027	6.69e-09	GATC
12	55172070	55172070	OR9R1P	OR9R1P	1	1	A	1	0	0	0	1	ACGT	rs143506080	12	55172070	A	T	0.15976	0.0275832	5.79192	7.03e-09	ACGT
2	27518238	27518238	GCKR	GCKR	1	1	A	1	0	0	0	1	AATT	rs780095	2	27518238	G	A	-0.138225	0.0239109	-5.78083	7.51e-09	AATT
2	68939191	68939191	GKN2	GKN2	1	1	C	0	1	0	0	1	CCGA	rs115319105	2	68939191	C	T	0.220221	0.0382899	5.75143	8.94e-09	CCGA
X	117423266	117423266	SETP8	SETP8	1	1	A	1	0	0	0	1	ACGA	rs5958457	X	117423266	T	G	0.113137	0.0197537	5.72739	1.03e-08	ACGA
6	67553766	67553766	RNU6-280P	RNU6-280P	1	1	C	0	1	0	0	1	CCGT	rs2263067	6	67553766	A	G	0.261505	0.0459191	5.6949	1.25e-08	CCGT
2	185847594	185847594	FSIP2	FSIP2	1	1	C	0	1	0	0	1	CCGT	rs12986884	2	185847594	T	C	-0.312933	0.0549926	-5.69046	1.28e-08	CCGT
11	25902010	25902010	LINC02699	LINC02699	1	1	A	1	0	0	0	1	ACGA	rs185075963	11	25902010	C	T	0.160673	0.0283662	5.66423	1.49e-08	ACGA
8	50296735	50296735	SNTG1	SNTG1	1	1	C	0	1	0	0	1	CCGT	rs113267514	8	50296735	G	A	0.146853	0.0259476	5.65961	1.53e-08	CCGT
10	34880897	34887935	SS18L2P1	SS18L2P1	7039	4	A	1	0	0	0	1	AGGG	rs10827459	10	34887935	C	T	-0.0588016	0.010448	-5.62804	1.84e-08	AGGG
X	56091361	56102045	KLF8	KLF8	10685	7	A	1	0	0	0	1	ACCG	rs4826448	X	56101277	C	T	0.0618065	0.0110065	5.61546	1.98e-08	ACCG
9	33978017	33978017	UBAP2	UBAP2	1	1	C	0	1	0	0	1	CTGT	rs544957562	9	33978017	T	A	0.47586	0.0847973	5.61173	2.02e-08	CTGT
4	8780818	8780818	HMX1	HMX1	1	1	T	0	0	0	1	1	TCCC	rs36140941	4	8780818	C	G	-0.172669	0.0308602	-5.5952	2.22e-08	TCCC
1	73382927	73382927	LINC01360	LINC01360	1	1	A	1	0	0	0	1	ACGG	rs61767420	1	73382927	A	G	0.0596983	0.0106846	5.58731	2.33e-08	ACGG
2	86645541	86664867	RNF103-CHMP3	CHMP3	19327	4	A	1	0	0	0	1	ACCG	rs7420475	2	86645541	T	C	0.121936	0.0219246	5.56162	2.7e-08	ACCG
8	75615190	75615190	HNF4G	HNF4G	1	1	C	0	1	0	0	1	CCGT	rs75729255	8	75615190	T	C	0.202702	0.0366667	5.52825	3.26e-08	CCGT
4	131397764	131397764	LINC02377	LINC02377	1	1	C	0	1	0	0	1	CCGT	rs4863842	4	131397764	A	G	0.219296	0.039678	5.52688	3.29e-08	CCGT
11	61790354	61796827	FEN1; TMEM258	TMEM258	6474	2	C	0	1	0	0	1	CTGC	rs102274	11	61790354	C	T	-0.0536269	0.00971502	-5.52	3.42e-08	CTGC
13	82821529	82821529	GYG1P2	GYG1P2	1	1	C	0	1	0	0	1	CCGC	rs4319639	13	82821529	T	A	0.286477	0.0519012	5.51966	3.43e-08	CCGC
8	18678800	18678800	PSD3	PSD3	1	1	T	0	0	0	1	1	TCGG	rs6997385	8	18678800	G	A	0.323747	0.0587004	5.51524	3.51e-08	TCGG
1	28157300	28157300	PTAFR	PTAFR	1	1	C	0	1	0	0	1	CTGG	rs313147	1	28157300	G	A	-0.173258	0.0314815	-5.50348	3.76e-08	CTGG
7	26803843	26803843	SKAP2	SKAP2	1	1	A	1	0	0	0	1	AACG	rs10215738	7	26803843	C	T	0.0853833	0.0155266	5.49917	3.85e-08	AACG
2	197989976	197989976	PLCL1	PLCL1	1	1	C	0	1	0	0	1	CAGT	rs17790682	2	197989976	C	T	-0.161976	0.0294629	-5.49763	3.88e-08	CAGT
5	43959752	43959752	RNU6-381P	RNU6-381P	1	1	C	0	1	0	0	1	CCGT	rs72764229	5	43959752	A	C	0.266673	0.048625	5.48429	4.19e-08	CCGT
14	101516644	101516644	DIO3OS	DIO3OS	1	1	A	1	0	0	0	1	ATGG	rs77256986	14	101516644	T	C	-0.21684	0.0395629	-5.48089	4.27e-08	ATGG
8	40457388	40457388	ZMAT4	ZMAT4	1	1	T	0	0	0	1	1	TTCC	rs111926153	8	40457388	T	G	0.164825	0.0300919	5.47738	4.35e-08	TTCC
10	58583588	58583588	BICC1	BICC1	1	1	C	0	1	0	0	1	CCGT	rs61874017	10	58583588	C	G	0.172936	0.0315963	5.47329	4.46e-08	CCGT
8	34455484	34455484	RPL10AP3	RPL10AP3	1	1	C	0	1	0	0	1	CCGT	rs28715307	8	34455484	A	G	0.461815	0.0844353	5.46946	4.55e-08	CCGT
12	38208418	38208418	NF1P12	NF1P12	1	1	A	1	0	0	0	1	ACGA	rs6582518	12	38208418	A	G	0.248627	0.0455697	5.45598	4.91e-08	ACGA

## Sheet: Table S2
Table S2. 23 Study-wide significant loci associated with cfDNA motif frequencies in GWAS analysis
Locus info														Replication info
Defined_locus_name	CHR	Locus_start_pos (bp)	Locus_end_pos (bp)	Mapped_gene	Number of significant motif start with A	Number of significant motif start with C	Number of significant motif start with G	Number of significant motif start with T	Total number of significant motifs	Significant_motif_start	Significant motifs	ACAT SNP	ACAT pvalue	Wuhan SNP	Wuhan pvalue	Natural SNP	Natural pvalue	Dutch SNP	Dutch pvalue
DFFB	1	3769207	3939752	CEP104; SMIM1; LRRC47; DFFB; CCDC27; C1orf174; LINC01134; LINC01346	38	30	21	34	123	A;G;T;C	GTAT; CTGA; CGAA; CTCG; GTCG; ACGT; ACCG; GTTC; AACG; GGTT; GTCT; CGAC; GTCA; CATG; CGGT; GAAA; TATG; TAAC; TGTA; ACCC; TCCT; AAAG; CTTT; TACA; CCAA; CACT; TATC; GCTC; CGAT; TAGC; GACT; TACC; TGCA; ACTG; AGTT; ATGC; AGTA; TCAC; CGAG; TAAG; ACCA; TTCC; TCAT; CGCA; TAAT; CTCC; TCCA; ACTA; CATC; TGTT; CAGA; AATC; ATTT; ACCT; TAGG; TGCT; CTCT; TCAA; TACT; TGAC; TGAG; GACC; AGAT; ACGC; AGCG; ACAT; AAC…	chr1:3875004	1.3152e-278	chr1:3877549	4.68993e-221	chr1:3868811	7.06578e-13	chr1:3868755	0
PADI4	1	17278265	17317968	PADI4; PADI3	2	3	1	0	6	A;G;C	CCGC; GCGC; CCAA; ACGC; CAAC; ACGG	chr1:17308916	4.39186e-13	chr1:17304448	1.8781e-08	chr1:16967059	3.74247e-06	chr1:17303810	3.17249e-46
LINC01221	1	199001286	199045484	LINC01222; LINC01221	1	0	0	0	1	A	ACCG	chr1:199045484	1.24389e-09	chr1:199045484	5.10397e-06	NA	NA	chr1:199041592	1.08493e-19
DNASE1L3	3	58195642	58504938	ABHD6; RPP14; DNASE1L3; ACOX2; KCTD6; PXK; PDHB	2	1	9	6	18	A;G;T;C	GTAC; ACCC; TAGC; TTTA; TTCC; TTTT; GTCC; GTGC; GTGT; CCAA; GTGA; GTTT; TTTG; TTTC; GTTC; GTCA; ACCA; GTTG	chr3:58320594	1.23382e-28	chr3:58200247	8.73266e-17	chr3:58175650	2.05973e-07	chr3:57830689	0
RNU6ATAC15P	3	110498827	110498827	RNU6ATAC15P	2	3	0	0	5	A;C	CCGG; CCGA; ACGA; CCGT; ACGG	chr3:110498827	6.29924e-12	NA	NA	NA	NA	NA	NA
LINC01192	3	162981822	162981822	LINC01192	0	1	0	0	1	C	CCGT	chr3:162981822	4.44181e-10	chr3:162747439	3.65477e-06	chr3:162511268	6.31349e-06	NA	NA
RPL30P6	4	95690307	95690307	RPL30P6	0	2	0	0	2	C	CCGG; CCGA	chr4:95690307	1.58058e-08	NA	NA	NA	NA	chr4:95785764	7.86738e-08
FCHO2	5	72854032	73098958	FCHO2; TNPO1	1	9	3	0	13	A;G;C	CTGC; CTGA; CCGA; CTGG; CAGA; CTCG; GATT; CCGT; GATA; CTGT; GAAT; ATAG; CTAG	chr5:73030617	7.08112e-12	chr5:73021895	4.86939e-08	NA	NA	chr5:73104069	1.23737e-50
NAMPTP2	5	144775767	144775767	NAMPTP2	0	1	0	0	1	C	CCGT	chr5:144775767	1.18396e-09	NA	NA	chr5:145188263	3.59072e-06	NA	NA
CYP3A7	7	99689566	99712062	CYP3A51P; CYP3A7	0	1	0	0	1	C	CTGA	chr7:99698250	1.59129e-08	chr7:99702608	7.90326e-06	chr7:99834554	4.07759e-06	chr7:99735325	4.03367e-20
MSR1	8	16183123	16183123	MSR1	0	1	1	0	2	G;C	CGAA; GATT	chr8:16183123	5.4764e-09	chr8:16183123	1.12738e-06	chr8:15947388	1.64791e-07	chr8:16193470	5.06524e-26
ZFPM2	8	105522371	105546007	ZFPM2	2	0	0	0	2	A	ACCG; ACTT	chr8:105546007	9.44587e-09	chr8:105534219	4.70566e-07	chr8:105248180	2.96757e-06	chr8:105569300	3.31665e-21
CSMD3	8	112459362	112459362	CSMD3	0	2	0	0	2	C	CCGT; CCGA	chr8:112459362	1.27419e-10	NA	NA	NA	NA	chr8:112250504	4.17571e-07
ABO	9	133247439	133279427	ABO	0	3	0	2	5	T;C	TGCT; CGAT; CGCA; CGAA; TGCA	chr9:133266456	1.16141e-12	chr9:133256264	1.71849e-18	chr9:133542086	1.39301e-06	chr9:133252613	4.06818e-32
LINC02750	11	50407136	50407136	LINC02750	0	1	0	1	2	T;C	CCGT; TTCC	chr11:50407136	3.1278e-09	chr11:50574526	1.25847e-06	NA	NA	chr11:50756387	5.20511e-06
OR5D17P	11	55761798	55761798	OR5D17P	0	2	0	2	4	T;C	TTCT; CCGT; CCGA; TTCC	chr11:55761798	5.66991e-10	chr11:55405359	1.1204e-06	chr11:56088003	8.92934e-07	chr11:55836170	2.08065e-13
PANX1	11	93844839	94593599	PIWIL4; C11orf97; GPR83; VSTM5; HEPHL1; FUT4; IZUMO1R; PANX1; HPRT1P3	37	32	27	37	133	A;G;T;C	GTAT; CTGA; CGAA; GTAG; CTCG; GTCG; ACCG; TGGA; GTTC; AACG; GGTT; GTCT; AAGC; CGAC; GTCA; CATG; CGGT; GAAA; TATG; TAAC; TGTA; ACCC; TCCT; AAAG; CTTT; TATT; TACA; CCAA; CACT; TATC; GCTC; AAGT; CGAT; TAGC; GACT; TACC; TGCA; GCTA; ACTG; AGTT; GGCT; AGTA; TCAC; CGAG; TAAG; ACCA; TCAT; CCGA; CGCA; TAAT; CTCC; TCCA; TCCC; ACTA; CATC; TGTT; CAGA; ATGA; AATC; ATTT; ACCT; GTAA; TAGG; TGCT; CTCT; TCAA; GTT…	chr11:94148160	0	chr11:94112345	1.79096e-159	chr11:94078446	6.30899e-10	chr11:94073539	0
B4GALNT3	12	480709	480709	B4GALNT3	1	0	0	0	1	A	ATAG	chr12:480709	1.207e-08	chr12:382141	4.36387e-06	chr12:178192	9.15897e-06	chr12:481093	2.78433e-10
ANKRD26P1	16	46388624	46400897	ANKRD26P1	2	11	4	1	18	A;G;T;C	ATCG; AAAG; CTCT; CCTT; CCTC; CTTT; GAGA; GAAC; TGTT; CACT; CTCC; CTTC; CCAT; GAAG; CGTT; CTTG; CCCT; GAAA	chr16:46389526	4.83621e-14	chr16:46400897	8.78761e-09	NA	NA	NA	NA
PSMD3	17	39986424	40048853	CSF3; PSMD3; MED24	0	1	0	19	20	T;C	TTAC; TCGT; TTCC; TTCT; TTGG; TTGA; TTTC; TTTT; TTGT; TCGA; TTAG; TTAA; TCGC; TCGG; TTCA; TTTG; TTAT; CGAT; TTCG; TTGC	chr17:40010626	1.39674e-16	chr17:40019308	1.62203e-13	NA	NA	chr17:40003082	3.60828e-37
NFIC	19	3458402	3458402	NFIC	0	0	2	0	2	G	GTAC; GTGT	chr19:3458402	1.43416e-12	chr19:3458402	4.41387e-30	chr19:3843834	5.64579e-08	chr19:3484613	5.18215e-08
FXYD5	19	35158291	35200616	FAM187B; FXYD5	9	0	4	0	13	A;G	GTCT; ATCG; GCTT; GACT; ATCT; ACTG; ACCG; ACTC; ACTT; AGTT; GATT; ACCT; AACG	chr19:35194212	4.22637e-15	NA	NA	chr19:34709020	4.28947e-08	chr19:34995571	1.69817e-07
DNASE1L1	X	154316155	154490533	FLNA; TKTL1; SLC10A3; DNASE1L1; RPL10; TAZ; EMD	0	0	7	0	7	G	GTAC; GTGC; GTGT; GTGA; GTCA; GTTG; GTAA	chrX:154403855	3.75027e-22	NA	NA	NA	NA	chr23:154436352	5.71084e-26

## Sheet: Table S3
Table S3. Heritability and number of significant loci for each cfDNA motif
motif	h2	h2_std	intercept	intercept_std	No.of.loci (Genome-wide)	No.of.loci (Study-wide)
AAAA	NA	NA	NA	NA	2	2
AAAT	NA	NA	NA	NA	0	0
AAAC	0.0003	0.0185	1.0155	0.0099	0	0
AAAG	NA	NA	NA	NA	3	3
AATA	NA	NA	NA	NA	0	0
AATT	0.0624	0.0259	1.0291	0.0111	3	2
AATC	0.07	0.0235	1.0314	0.0109	2	2
AATG	0.0301	0.0195	1.0344	0.0109	0	0
AACA	0.0192	0.0175	1.0142	0.0102	0	0
AACT	0.0779	0.0303	1.0301	0.0115	2	2
AACC	0.0543	0.0209	1.0426	0.0108	3	2
AACG	0.0328	0.0328	1.031	0.0104	5	3
AAGA	0.002	0.02	1.0064	0.0103	2	2
AAGT	NA	NA	NA	NA	2	1
AAGC	0.0199	0.0182	0.9942	0.0096	2	1
AAGG	0.0218	0.0207	1.0041	0.0105	2	2
ATAA	0.0243	0.0196	1.0038	0.0102	0	0
ATAT	0.0346	0.021	1.0066	0.0102	2	2
ATAC	0.0591	0.0211	0.9857	0.0103	1	0
ATAG	0.095	0.0243	1.0206	0.0118	2	2
ATTA	0.0107	0.0179	1.0285	0.01	2	2
ATTT	0.0745	0.0284	1.0195	0.0112	3	2
ATTC	0.0811	0.0291	1.0093	0.0108	3	2
ATTG	0.0169	0.0194	1.0173	0.0105	3	2
ATCA	0.0476	0.0197	0.9703	0.0094	2	2
ATCT	0.1176	0.039	1.0058	0.0113	4	3
ATCC	0.0809	0.0257	1.0044	0.0107	2	2
ATCG	0.123	0.0357	1.0029	0.0102	6	4
ATGA	0.0564	0.0204	0.9949	0.0105	1	1
ATGT	0.0699	0.0228	1.0161	0.0111	1	1
ATGC	0.1058	0.0263	1.0273	0.0122	6	1
ATGG	0.1042	0.0244	1.0477	0.0116	5	0
ACAA	0.0079	0.0196	1.0175	0.0107	2	0
ACAT	0.0645	0.0253	1.0458	0.0108	3	2
ACAC	0.0574	0.0198	0.9947	0.0102	2	0
ACAG	0.0506	0.0193	0.9897	0.0107	1	0
ACTA	0.0895	0.0281	1.0501	0.0115	2	2
ACTT	0.1521	0.0497	1.0429	0.0117	6	4
ACTC	0.1232	0.0454	1.0547	0.0112	5	3
ACTG	0.097	0.0317	1.0562	0.0118	4	3
ACCA	0.0729	0.0247	1.0486	0.01	3	3
ACCT	0.1036	0.039	1.0589	0.0111	6	3
ACCC	0.0168	0.0211	1.0556	0.0111	3	3
ACCG	0.0922	0.0393	1.0553	0.0109	8	5
ACGA	0.0636	0.0217	1.0442	0.0106	10	1
ACGT	0.0279	0.0227	1.0629	0.0118	9	1
ACGC	0.0261	0.0226	1.0709	0.0123	6	2
ACGG	0.035	0.0233	1.0643	0.0127	4	2
AGAA	0.0613	0.0217	0.9839	0.0114	0	0
AGAT	0.0422	0.0213	0.9947	0.0108	2	2
AGAC	0.0538	0.022	0.9947	0.0108	0	0
AGAG	0.0553	0.0218	1.0071	0.0108	3	0
AGTA	0.0155	0.0192	1.0182	0.0105	2	2
AGTT	0.1144	0.0361	1.0096	0.0107	3	3
AGTC	0.0393	0.0217	1.023	0.0114	2	2
AGTG	0.0124	0.0197	1.0397	0.0106	1	0
AGCA	0.0519	0.0198	0.9945	0.0108	0	0
AGCT	0.0808	0.0308	1.0223	0.0119	4	2
AGCC	0.0024	0.0202	1.0405	0.0108	2	2
AGCG	0.0149	0.021	1.0419	0.0109	2	2
AGGA	0.0776	0.0219	0.9999	0.0106	1	0
AGGT	0.0897	0.0223	1.0261	0.0102	4	0
AGGC	0.0554	0.0215	1.035	0.0101	2	0
AGGG	0.0539	0.0205	1.0175	0.0107	2	0
TAAA	NA	NA	NA	NA	2	2
TAAT	NA	NA	NA	NA	2	2
TAAC	0.0068	0.0194	1.0526	0.011	2	2
TAAG	NA	NA	NA	NA	2	2
TATA	0.0048	0.0201	1.0552	0.0105	2	2
TATT	NA	NA	NA	NA	3	1
TATC	0.0232	0.0183	1.0301	0.0104	2	2
TATG	0.0456	0.0224	1.0316	0.0105	2	2
TACA	0.0298	0.022	1.0455	0.0109	2	2
TACT	0.0332	0.0202	1.0147	0.0106	2	2
TACC	0.0485	0.0198	1.0136	0.0112	3	2
TACG	0.0149	0.0191	1.0203	0.0102	2	2
TAGA	NA	NA	NA	NA	2	2
TAGT	0.0171	0.0196	1.0504	0.0101	2	2
TAGC	0.034	0.021	1.0561	0.0114	3	3
TAGG	0.0404	0.0183	1.06	0.0102	2	2
TTAA	0.0485	0.0198	1.039	0.0103	1	1
TTAT	0.0771	0.0217	1.0314	0.0104	2	1
TTAC	0.072	0.0206	1.0288	0.0101	1	1
TTAG	0.0628	0.0198	1.0352	0.0104	1	1
TTTA	0.0097	0.0201	1.0325	0.0112	3	1
TTTT	0.0131	0.02	1.0284	0.0107	2	2
TTTC	0.0315	0.0204	1.0111	0.0101	2	2
TTTG	0.0314	0.0192	1.0258	0.0101	2	2
TTCA	0.088	0.0214	1.0366	0.0101	4	1
TTCT	0.0841	0.0217	1.03	0.0102	6	2
TTCC	0.077	0.0216	1.0348	0.0101	10	5
TTCG	0.0717	0.0216	1.0474	0.0109	1	1
TTGA	0.0344	0.0191	1.0355	0.0103	1	1
TTGT	0.047	0.0199	1.0421	0.0102	1	1
TTGC	0.0418	0.0209	1.0382	0.0108	1	1
TTGG	0.0621	0.0213	1.0462	0.0108	1	1
TCAA	0.0017	0.0182	1.0251	0.0105	2	2
TCAT	0.0339	0.0198	1.0081	0.0112	2	2
TCAC	0.037	0.021	1.0101	0.0117	2	2
TCAG	NA	NA	NA	NA	2	0
TCTA	0.0576	0.0205	1.0081	0.0104	2	2
TCTT	0.0173	0.0207	1.017	0.0106	0	0
TCTC	0.0399	0.0212	0.9995	0.0109	1	0
TCTG	0.028	0.0204	1.0054	0.0105	1	0
TCCA	0.0205	0.0221	1.0274	0.0117	2	2
TCCT	0.0176	0.0211	1.0138	0.0111	2	2
TCCC	NA	NA	NA	NA	3	1
TCCG	NA	NA	NA	NA	1	0
TCGA	0.0272	0.0213	1.0592	0.011	1	1
TCGT	0.0332	0.0206	1.0483	0.0106	1	1
TCGC	0.0262	0.022	1.0625	0.012	3	1
TCGG	0.0317	0.0216	1.0769	0.0116	4	1
TGAA	0.0556	0.0196	1.0373	0.0103	3	2
TGAT	0.0075	0.0205	1.0385	0.0108	4	2
TGAC	0.0246	0.0204	1.0452	0.0104	3	2
TGAG	0.0425	0.018	1.0387	0.0101	2	2
TGTA	NA	NA	NA	NA	3	2
TGTT	NA	NA	NA	NA	5	3
TGTC	NA	NA	NA	NA	3	2
TGTG	0.0357	0.0204	1.0099	0.0105	2	2
TGCA	0.0031	0.0175	1.0194	0.0098	3	3
TGCT	NA	NA	NA	NA	3	3
TGCC	NA	NA	NA	NA	3	2
TGCG	0.0139	0.0167	1.0006	0.0095	0	0
TGGA	0.0669	0.0183	1.0139	0.0095	2	1
TGGT	0.0677	0.0195	1.024	0.0108	2	2
TGGC	0.0161	0.0184	1.0145	0.0105	1	1
TGGG	0.0432	0.0186	1.0067	0.01	1	0
CAAA	0.0199	0.0207	1.0086	0.0111	2	2
CAAT	0.0008	0.0183	1.0043	0.0096	2	0
CAAC	0.0249	0.0194	0.9833	0.0098	3	3
CAAG	0.0731	0.0212	1.0024	0.0099	4	2
CATA	0.0005	0.0185	1.021	0.0105	0	0
CATT	0.036	0.0199	1.0136	0.0109	4	2
CATC	0.0219	0.0196	1.0236	0.011	3	2
CATG	0.0186	0.0201	1.0328	0.0098	4	2
CACA	0.0189	0.0203	0.999	0.0102	1	0
CACT	0.0337	0.0193	1.0123	0.0104	3	3
CACC	NA	NA	NA	NA	1	0
CACG	0.0157	0.019	1.041	0.0107	3	2
CAGA	0.0843	0.0205	1.0167	0.0102	3	3
CAGT	0.0745	0.0216	1.0451	0.0108	3	2
CAGC	0.0512	0.0199	1.0434	0.0106	1	0
CAGG	0.0666	0.0187	1.0259	0.0103	3	2
CTAA	0.0608	0.0221	0.9992	0.011	0	0
CTAT	0.0432	0.0217	1.0014	0.0103	0	0
CTAC	0.0797	0.0233	0.9932	0.0109	1	0
CTAG	0.1225	0.0248	1.0211	0.0112	5	1
CTTA	NA	NA	NA	NA	0	0
CTTT	0.0057	0.019	1.0202	0.0103	4	3
CTTC	0.0278	0.019	1.0051	0.0102	4	3
CTTG	0.0255	0.0211	1.0249	0.011	1	1
CTCA	0.0793	0.0225	0.9932	0.0103	1	0
CTCT	0.0614	0.0209	1.0083	0.0113	3	3
CTCC	0.0553	0.0217	1.0233	0.0117	3	3
CTCG	0.0738	0.0219	1.0331	0.0108	3	3
CTGA	0.1116	0.0247	1.0166	0.0114	6	4
CTGT	0.1107	0.0239	1.0271	0.0115	5	1
CTGC	0.1062	0.0233	1.0422	0.0111	4	1
CTGG	0.1219	0.0239	1.0494	0.0116	7	1
CCAA	0.0229	0.02	1.0067	0.0101	5	4
CCAT	NA	NA	NA	NA	4	1
CCAC	NA	NA	NA	NA	2	2
CCAG	0.0021	0.0184	1.0164	0.0103	2	2
CCTA	0.0378	0.0188	1.0247	0.0104	0	0
CCTT	0.0108	0.0188	1.0301	0.0109	4	3
CCTC	NA	NA	NA	NA	1	1
CCTG	NA	NA	NA	NA	2	0
CCCA	NA	NA	NA	NA	4	2
CCCT	NA	NA	NA	NA	1	1
CCCC	NA	NA	NA	NA	0	0
CCCG	NA	NA	NA	NA	0	0
CCGA	0.06	0.0214	1.0797	0.0112	19	6
CCGT	0.0537	0.0208	1.0977	0.0113	27	7
CCGC	0.0199	0.0193	1.0776	0.0108	7	1
CCGG	0.0359	0.0218	1.0766	0.0119	9	2
CGAA	0.0106	0.0208	1.0384	0.0112	4	4
CGAT	NA	NA	NA	NA	4	4
CGAC	NA	NA	NA	NA	2	2
CGAG	0.0045	0.0195	1.032	0.0108	2	2
CGTA	0.0043	0.0202	1.0745	0.0108	12	2
CGTT	NA	NA	NA	NA	2	1
CGTC	NA	NA	NA	NA	0	0
CGTG	0.0022	0.019	1.0322	0.0095	4	2
CGCA	NA	NA	NA	NA	3	3
CGCT	NA	NA	NA	NA	1	0
CGCC	NA	NA	NA	NA	0	0
CGCG	NA	NA	NA	NA	0	0
CGGA	0.0176	0.0173	1.0049	0.0099	2	1
CGGT	0.0138	0.0175	0.9964	0.0099	2	2
CGGC	NA	NA	NA	NA	0	0
CGGG	0.0129	0.0169	1.0005	0.0099	1	0
GAAA	NA	NA	NA	NA	3	3
GAAT	0.0323	0.0215	1.0309	0.0107	3	1
GAAC	0.0458	0.0213	1.0097	0.0116	1	1
GAAG	0.0297	0.0199	0.9942	0.011	4	2
GATA	0.0432	0.0236	1.0668	0.0113	3	3
GATT	0.1365	0.0403	1.0274	0.0112	6	5
GATC	0.0907	0.0289	1.0344	0.0113	4	2
GATG	0.0633	0.0225	1.0028	0.0115	1	0
GACA	0.0381	0.0217	1.0362	0.0108	5	1
GACT	0.0867	0.0325	1.023	0.0121	4	3
GACC	0.0425	0.0185	0.9989	0.0097	2	2
GACG	0.0138	0.0213	1.0143	0.0102	4	2
GAGA	0.0065	0.0214	1.0155	0.0116	5	2
GAGT	0.0195	0.022	1.0039	0.0111	0	0
GAGC	NA	NA	NA	NA	0	0
GAGG	0.009	0.0203	1.0083	0.0111	3	0
GTAA	NA	NA	NA	NA	3	2
GTAT	0.023	0.0191	1.0373	0.0104	5	2
GTAC	0.0146	0.0211	1.0277	0.0112	5	4
GTAG	0.0704	0.0208	1.0036	0.0102	1	1
GTTA	0.0463	0.0216	1.0555	0.0109	6	1
GTTT	0.0578	0.026	1.039	0.0122	5	3
GTTC	0.066	0.0244	1.0266	0.0116	4	3
GTTG	0.0113	0.0205	1.0332	0.0117	3	2
GTCA	0.0448	0.0207	1.0038	0.0115	4	4
GTCT	0.0833	0.0316	1.0217	0.0101	7	3
GTCC	0.0289	0.0207	1.0268	0.0108	3	3
GTCG	NA	NA	NA	NA	2	2
GTGA	0.0454	0.022	1.0139	0.0109	5	4
GTGT	0.0443	0.0227	1.0393	0.0104	5	3
GTGC	0.0209	0.0214	1.0566	0.011	3	2
GTGG	0.0509	0.0218	1.0388	0.0113	3	1
GCAA	0.0332	0.0194	0.9987	0.011	1	0
GCAT	0.0559	0.0203	0.9917	0.0109	0	0
GCAC	0.0419	0.0204	0.9846	0.0107	0	0
GCAG	0.0336	0.0202	0.9871	0.0109	0	0
GCTA	0.0595	0.0216	1.0193	0.0112	1	1
GCTT	0.081	0.031	1.0349	0.0109	4	3
GCTC	0.0459	0.0215	1.0043	0.0102	2	2
GCTG	0.0424	0.0208	0.9934	0.0109	1	0
GCCA	0.0293	0.0197	1.0099	0.0103	1	0
GCCT	0.0242	0.0195	1.0118	0.0099	2	2
GCCC	0.0128	0.0192	1.0142	0.0098	0	0
GCCG	0.0085	0.0191	1.008	0.0098	1	0
GCGA	0.0043	0.0207	1.0216	0.0108	0	0
GCGT	0.0021	0.0203	1.028	0.0103	1	0
GCGC	NA	NA	NA	NA	1	1
GCGG	NA	NA	NA	NA	1	0
GGAA	0.0393	0.0176	0.9707	0.0103	2	0
GGAT	0.0519	0.0167	0.9627	0.0095	0	0
GGAC	0.0349	0.0175	0.9733	0.0096	0	0
GGAG	0.0388	0.0188	0.9717	0.0102	3	0
GGTA	0.0694	0.0177	0.9686	0.0096	2	0
GGTT	0.0908	0.022	0.9776	0.0102	2	2
GGTC	0.0384	0.0175	0.9747	0.0096	0	0
GGTG	0.0702	0.0183	0.9508	0.0092	1	0
GGCA	0.0323	0.0183	0.9786	0.0095	0	0
GGCT	0.0186	0.0182	0.9927	0.0094	2	1
GGCC	0.0208	0.0181	0.9856	0.0096	0	0
GGCG	0.0235	0.0178	0.9856	0.0089	0	0
GGGA	0.0474	0.0173	0.9539	0.0098	1	0
GGGT	0.0673	0.0184	0.9418	0.0093	0	0
GGGC	0.0386	0.0178	0.9726	0.0093	0	0
GGGG	0.0452	0.0184	0.9649	0.0098	0	0

## Sheet: Table S4
Table S4. P-values of heritability partition analysis
Cell-type Name	Category	AAAA	AAAT	AAAC	AAAG	AATA	AATT	AATC	AATG	AACA	AACT	AACC	AACG	AAGA	AAGT	AAGC	AAGG	ATAA	ATAT	ATAC	ATAG	ATTA	ATTT	ATTC	ATTG	ATCA	ATCT	ATCC	ATCG	ATGA	ATGT	ATGC	ATGG	ACAA	ACAT	ACAC	ACAG	ACTA	ACTT	ACTC	ACTG	ACCA	ACCT	ACCC	ACCG	ACGA	ACGT	ACGC	ACGG
A10.165.114.830.500.750.Subcutaneous.Fat..Abdominal	Adipose	0.312926	0.631821	0.527788	0.186994	0.257409	0.775818	0.667445	0.355525	0.442406	0.645139	0.889552	0.72299	0.634783	0.363137	0.737499	0.631817	0.571153	0.782086	0.581041	0.201982	0.561764	0.659649	0.730696	0.740052	0.927265	0.70885	0.946128	0.600102	0.552674	0.80261	0.406195	0.251131	0.38422	0.471084	0.715187	0.679573	0.289425	0.328255	0.423008	0.431156	0.395927	0.258916	0.091573	0.224101	0.153413	0.20806	0.0768482	0.188251
A10.165.114.830.750.Subcutaneous.Fat	Adipose	0.437384	0.761448	0.754126	0.381909	0.353886	0.729971	0.602289	0.514684	0.653328	0.560567	0.818351	0.662612	0.71592	0.542965	0.682679	0.786325	0.698594	0.805919	0.660034	0.272326	0.651627	0.672805	0.83522	0.861768	0.959258	0.675719	0.959794	0.631149	0.62501	0.807808	0.369591	0.282504	0.796136	0.709172	0.928049	0.919777	0.283952	0.287046	0.320459	0.438453	0.195211	0.271202	0.14586	0.268348	0.116676	0.28402	0.0387234	0.131308
A11.329.114.Adipocytes	Adipose	0.264574	0.291129	0.370802	0.658649	0.222902	0.646244	0.692968	0.384409	0.574531	0.687498	0.910292	0.780568	0.763384	0.851325	0.338586	0.883157	0.256318	0.188787	0.173119	0.66515	0.380943	0.639677	0.696133	0.389981	0.35894	0.557241	0.350447	0.345395	0.291815	0.170753	0.147953	0.782429	0.166151	0.558825	0.732553	0.474829	0.403333	0.742996	0.654552	0.463253	0.396477	0.624639	0.16117	0.398796	0.609734	0.137734	0.258222	0.794688
Adipose_Subcutaneous	Adipose	0.34931	0.438618	0.165161	0.180782	0.212213	0.577739	0.314935	0.105191	0.166996	0.278281	0.096936	0.590116	0.248832	0.517615	0.302155	0.254584	0.533889	0.680352	0.719696	0.238783	0.608374	0.569723	0.702715	0.665787	0.894199	0.563115	0.730441	0.457451	0.386197	0.619523	0.222974	0.24554	0.686176	0.424921	0.675523	0.895658	0.181742	0.248297	0.126073	0.244767	0.179537	0.211863	0.227685	0.311598	0.421374	0.141996	0.20844	0.66956
Adipose_Visceral_(Omentum)	Adipose	0.287911	0.0532221	0.158881	0.125149	0.00567108	0.0943897	0.131579	0.00583899	0.0609262	0.0978732	0.361621	0.614801	0.509292	0.400203	0.585436	0.277375	0.693167	0.8214	0.878687	0.264485	0.14536	0.393019	0.669198	0.65042	0.952601	0.659607	0.937256	0.491038	0.696082	0.806859	0.533204	0.208399	0.285878	0.105069	0.229136	0.484966	0.023534	0.0598916	0.21971	0.324041	0.184565	0.254678	0.83481	0.362259	0.697799	0.642612	0.287338	0.769895
A02.835.583.443.800.800.Synovial.Fluid	Blood/Immune	0.033954	0.241523	0.0491351	0.018308	0.243965	0.224086	0.182787	0.324708	0.0571642	0.0864262	0.0656436	0.10035	0.0254874	0.641233	0.0528811	0.0257167	0.613346	0.873026	0.728458	0.630027	0.560036	0.244495	0.144151	0.268616	0.531239	0.0674455	0.0854591	0.0535248	0.113163	0.760935	0.461907	0.571501	0.202331	0.0495302	0.271875	0.602324	0.165229	0.0225569	0.0101726	0.0870843	0.261602	0.00568827	0.141398	0.00364277	0.890381	0.678601	0.849353	0.947971
A10.549.400.Lymph.Nodes	Blood/Immune	0.0517718	0.269395	0.0773454	0.245103	0.267413	0.861994	0.633801	0.124313	0.164196	0.573641	0.223942	0.139029	0.111749	0.0548775	0.183575	0.0877947	0.766853	0.981996	0.898541	0.776472	0.813212	0.990389	0.9602	0.899609	0.845019	0.98442	0.945042	0.882583	0.395496	0.75989	0.640142	0.480808	0.192565	0.115273	0.117078	0.536283	0.536734	0.717065	0.261551	0.0987454	0.202783	0.0936599	0.160345	0.0338474	0.239089	0.369728	0.847072	0.79146
A10.549.Lymphoid.Tissue	Blood/Immune	0.0648808	0.189568	0.0477903	0.279656	0.125352	0.674782	0.325607	0.109148	0.150322	0.482374	0.176244	0.175737	0.24676	0.0135754	0.178165	0.137961	0.835444	0.969248	0.908261	0.678685	0.473729	0.949715	0.886601	0.645693	0.700243	0.96042	0.830172	0.572852	0.440819	0.754498	0.604434	0.501913	0.0859618	0.114632	0.0710141	0.388622	0.567843	0.685604	0.32572	0.328924	0.516117	0.239909	0.448588	0.172686	0.176483	0.300639	0.853635	0.666595
A11.118.637.555.567.562.440.Precursor.Cells..B.Lymphoid	Blood/Immune	0.0462524	0.129141	0.0148856	0.0394622	0.520318	0.921824	0.894445	0.392091	0.374484	0.949134	0.913144	0.194854	0.0571308	0.613297	0.141976	0.178313	0.473378	0.786871	0.820614	0.872294	0.786398	0.957231	0.940374	0.826587	0.709679	0.853036	0.675038	0.532103	0.420137	0.759445	0.894053	0.957913	0.629687	0.898041	0.413493	0.444813	0.966762	0.850692	0.869388	0.630665	0.993065	0.699276	0.424625	0.117815	0.954805	0.958115	0.885824	0.978549
A11.118.637.555.567.562.B.Lymphocytes	Blood/Immune	0.265178	0.247844	0.288959	0.212716	0.28335	0.335657	0.356526	0.384603	0.624488	0.66095	0.823323	0.69388	0.346433	0.686887	0.427444	0.482254	0.454464	0.542968	0.462992	0.325297	0.413721	0.52756	0.487635	0.842376	0.577692	0.678894	0.509587	0.759863	0.591328	0.449895	0.371021	0.535162	0.801555	0.877308	0.806583	0.45319	0.847479	0.623746	0.694271	0.723827	0.931025	0.778995	0.959797	0.539172	0.693291	0.326364	0.263944	0.472312
A11.118.637.555.567.569.200.700.T.Lymphocytes..Regulatory	Blood/Immune	0.19638	0.0376465	0.0071224	0.0142974	0.226474	0.0650144	0.0824564	0.623036	0.0982659	0.0651546	0.177065	0.177822	0.00658974	0.692635	0.118984	0.0166452	0.154979	0.285461	0.298382	0.73411	0.216618	0.237621	0.326918	0.194886	0.248233	0.182742	0.57247	0.147823	0.129491	0.837056	0.975844	0.980643	0.963242	0.528949	0.76615	0.845536	0.676217	0.15902	0.205779	0.513103	0.844393	0.208668	0.526932	0.217157	0.984693	0.957174	0.949993	0.97213
A11.118.637.555.567.569.T.Lymphocytes	Blood/Immune	0.217661	0.154807	0.162542	0.0459181	0.364635	0.191491	0.342834	0.811885	0.250922	0.204677	0.643537	0.0608232	0.0646037	0.52849	0.242053	0.0720861	0.186637	0.41235	0.509784	0.778944	0.262601	0.387868	0.55692	0.199419	0.319918	0.373288	0.773356	0.291739	0.0352527	0.780235	0.948163	0.844971	0.786084	0.453833	0.229395	0.304855	0.639963	0.211201	0.316074	0.513683	0.866716	0.298141	0.535211	0.165171	0.921234	0.994942	0.985202	0.930568
A11.118.637.Leukocytes	Blood/Immune	0.501119	0.614706	0.289309	0.316719	0.871345	0.900673	0.73731	0.420818	0.705041	0.90213	0.312069	0.0233826	0.38626	0.720555	0.82654	0.278274	0.0668376	0.197944	0.0345897	0.100264	0.750406	0.883915	0.636612	0.167745	0.011989	0.56333	0.0554569	0.321216	0.00759586	0.0511166	0.0153611	0.175696	0.449287	0.832197	0.0302867	0.011598	0.973429	0.798052	0.579913	0.414912	0.909889	0.567773	0.384867	0.114231	0.432517	0.671847	0.304793	0.515204
A11.329.372.600.Macrophages..Alveolar	Blood/Immune	0.261429	0.61188	0.372943	0.229613	0.250263	0.414407	0.13202	0.0389632	0.27814	0.180864	0.0136674	0.25939	0.394841	0.00542346	0.109857	0.590683	0.597934	0.682739	0.294091	0.218614	0.581943	0.71651	0.420912	0.450458	0.432025	0.300685	0.15819	0.151673	0.39197	0.395133	0.037788	0.399978	0.105796	0.118647	0.225556	0.347458	0.102008	0.236338	0.181888	0.122918	0.216208	0.200834	0.400478	0.335618	0.108345	0.228823	0.205625	0.524497
A11.443.Erythroid.Cells	Blood/Immune	0.407039	0.646426	0.476862	0.338537	0.774711	0.164687	0.369136	0.924385	0.815685	0.143578	0.975341	0.0167202	0.0777761	0.538013	0.0129133	0.0824119	0.543906	0.412287	0.572179	0.22116	0.687354	0.0786654	0.167628	0.729879	0.681197	0.194944	0.33884	0.0820797	0.311189	0.384779	0.321397	0.030578	0.78021	0.0138954	0.157927	0.361833	0.0377346	0.00896212	0.00332299	0.00235615	0.0491517	0.00487757	0.273185	0.015409	0.620459	0.602038	0.607105	0.439445
A11.627.340.360.Granulocyte.Precursor.Cells	Blood/Immune	0.921611	0.970329	0.92509	0.788583	0.993584	0.644083	0.833753	0.991329	0.977433	0.753137	0.888981	0.0063133	0.657989	0.504539	0.148094	0.378918	0.789233	0.807879	0.857233	0.79514	0.861721	0.262272	0.143326	0.379432	0.831447	0.388242	0.5508	0.448246	0.727709	0.848838	0.966371	0.877199	0.73643	0.0457214	0.0191888	0.0763831	0.474299	0.170701	0.11632	0.0098626	0.288206	0.0314227	0.143989	0.0494639	0.974424	0.975208	0.846754	0.930687
A11.627.624.249.Monocyte.Macrophage.Precursor.Cells	Blood/Immune	0.640976	0.710392	0.545758	0.782194	0.406063	0.141606	0.205937	0.474498	0.329879	0.117454	0.35004	0.111149	0.786608	0.67879	0.686392	0.826804	0.552147	0.17493	0.20398	0.501283	0.184635	0.158542	0.0768635	0.155463	0.236951	0.138662	0.21475	0.0857876	0.507604	0.52665	0.261814	0.474835	0.529927	0.101191	0.158496	0.162182	0.294887	0.327356	0.413927	0.504229	0.676519	0.413147	0.433161	0.664056	0.0370464	0.283955	0.0713339	0.1109
A11.627.635.Myeloid.Progenitor.Cells	Blood/Immune	0.867735	0.507216	0.362658	0.830697	0.631171	0.0928236	0.241084	0.842757	0.7183	0.358552	0.694091	0.0266501	0.696114	0.833968	0.222469	0.634555	0.405111	0.395387	0.348314	0.631261	0.23864	0.124925	0.0952641	0.186998	0.39237	0.310158	0.387115	0.424786	0.454639	0.622842	0.760012	0.67366	0.936977	0.416172	0.601955	0.509496	0.809508	0.576985	0.765685	0.920147	0.984479	0.959303	0.982306	0.824665	0.410166	0.482449	0.219827	0.464999
A11.872.378.590.635.Granulocyte.Macrophage.Progenitor.Cells	Blood/Immune	0.585735	0.532134	0.451022	0.684022	0.448277	0.0493223	0.165841	0.543127	0.540749	0.124733	0.452546	0.0579487	0.635864	0.51459	0.28468	0.712087	0.477998	0.403069	0.383354	0.412133	0.122737	0.059902	0.0397931	0.0674999	0.402112	0.116417	0.362707	0.180846	0.333888	0.523003	0.318848	0.418341	0.531464	0.054657	0.108123	0.140378	0.254193	0.122581	0.177051	0.235907	0.524855	0.120525	0.207383	0.350734	0.288258	0.546254	0.176856	0.320564
A11.872.378.590.817.Megakaryocyte.Erythroid.Progenitor.Cells	Blood/Immune	0.723161	0.0552147	0.0449994	0.772335	0.212571	0.11515	0.133402	0.672209	0.241936	0.396498	0.849617	0.53692	0.347607	0.843825	0.0959085	0.530467	0.400577	0.452113	0.634744	0.917222	0.0343509	0.127892	0.168555	0.158328	0.23568	0.295587	0.361556	0.36945	0.608254	0.898892	0.951014	0.838933	0.96441	0.498975	0.896113	0.846647	0.678463	0.7377	0.814295	0.983916	0.971486	0.929348	0.985394	0.893536	0.644468	0.789559	0.391662	0.497308
A11.872.378.Hematopoietic.Stem.Cells	Blood/Immune	0.948247	0.708162	0.431762	0.767994	0.815268	0.0740669	0.191553	0.879116	0.704355	0.195749	0.551254	0.0206621	0.580351	0.683722	0.10765	0.512538	0.335945	0.161159	0.136134	0.371601	0.261857	0.050526	0.0333919	0.135707	0.121034	0.0784309	0.131972	0.0735842	0.218436	0.499026	0.5231	0.439702	0.941889	0.501587	0.43076	0.180819	0.681805	0.262164	0.512471	0.79634	0.960082	0.85208	0.982649	0.660208	0.480832	0.599586	0.234171	0.151389
A15.145.229.188.Blood.Platelets	Blood/Immune	0.283513	0.793566	0.909563	0.585663	0.754407	0.191872	0.478634	0.913584	0.861658	0.123264	0.795162	0.00735529	0.254744	0.121407	0.231833	0.157593	0.907457	0.429397	0.85359	0.980633	0.746561	0.163395	0.210366	0.420427	0.612635	0.115735	0.160674	0.0325781	0.803	0.723719	0.758631	0.814594	0.3297	0.0448219	0.14852	0.461047	0.11734	0.050942	0.0236494	0.0336928	0.109926	0.0475204	0.257214	0.0501087	0.795099	0.578006	0.699155	0.536059
A15.145.229.637.555.567.562.725.Plasma.Cells	Blood/Immune	0.330072	0.634932	0.636359	0.14389	0.58379	0.344239	0.448162	0.764037	0.92439	0.728352	0.94691	0.593019	0.328213	0.292746	0.368699	0.366298	0.699561	0.686686	0.643088	0.372141	0.643466	0.364068	0.377515	0.911828	0.843403	0.417744	0.466423	0.457143	0.848677	0.698348	0.499359	0.593592	0.710288	0.752516	0.687082	0.283756	0.785847	0.312809	0.391325	0.550031	0.958584	0.554388	0.935584	0.380686	0.792052	0.451196	0.557817	0.684567
A15.145.229.637.555.567.569.200.CD4.Positive.T.Lymphocytes	Blood/Immune	0.273121	0.0561169	0.0109173	0.0461662	0.454652	0.253556	0.159374	0.813105	0.132464	0.193074	0.205951	0.285833	0.0211381	0.894018	0.171787	0.036073	0.206127	0.318145	0.385629	0.865419	0.315166	0.521217	0.57998	0.157805	0.15979	0.373818	0.642517	0.350346	0.217537	0.740371	0.975755	0.987611	0.987424	0.800186	0.844284	0.907323	0.89689	0.431826	0.600902	0.836103	0.972513	0.609603	0.850297	0.385083	0.991123	0.985041	0.974135	0.956328
A15.145.229.637.555.Leukocytes..Mononuclear	Blood/Immune	0.276423	0.375526	0.106232	0.0559155	0.553628	0.565931	0.711321	0.600363	0.500831	0.728047	0.400373	0.283146	0.0744476	0.819474	0.218672	0.0388223	0.2401	0.567628	0.238152	0.187746	0.614101	0.676167	0.699363	0.354491	0.286858	0.437192	0.319476	0.457315	0.0324746	0.178362	0.0324453	0.0727836	0.806253	0.707806	0.360572	0.238546	0.917511	0.42397	0.358041	0.737181	0.888298	0.307435	0.76452	0.20914	0.309994	0.446157	0.295416	0.650516
A15.145.229.Blood.Cells	Blood/Immune	0.113405	0.662684	0.0774808	0.103119	0.746537	0.959335	0.879408	0.168574	0.575687	0.972973	0.27305	0.0364772	0.159773	0.202063	0.372378	0.271009	0.223955	0.488429	0.182692	0.130123	0.864752	0.964221	0.882254	0.151845	0.19146	0.763029	0.235576	0.531333	0.0133018	0.060897	0.011879	0.115102	0.184984	0.643439	0.105509	0.0755661	0.918586	0.860357	0.844484	0.481455	0.831167	0.756359	0.617504	0.275965	0.247192	0.678088	0.302031	0.734476
A15.145.300.Fetal.Blood	Blood/Immune	0.648772	0.980538	0.86887	0.479979	0.973483	0.416062	0.686089	0.876326	0.952742	0.494932	0.763743	0.0942686	0.514069	0.439149	0.504084	0.226326	0.667317	0.386883	0.41183	0.339451	0.915363	0.196423	0.29753	0.67792	0.272108	0.0242538	0.0576674	0.0918394	0.484977	0.272406	0.261913	0.595584	0.521855	0.177859	0.0710327	0.0874415	0.482362	0.0259008	0.0448056	0.0490474	0.258886	0.087091	0.531822	0.0521822	0.563157	0.629703	0.460838	0.654371
A15.145.846.Serum	Blood/Immune	0.462075	0.482321	0.842295	0.602787	0.776129	0.257316	0.618304	0.83738	0.872543	0.529117	0.302035	0.853912	0.768725	0.457574	0.593484	0.874981	0.544296	0.148821	0.18445	0.254844	0.600834	0.28838	0.391256	0.246222	0.198408	0.306934	0.255813	0.366614	0.443485	0.0941647	0.10875	0.380236	0.659729	0.829184	0.526763	0.328957	0.767967	0.416436	0.388185	0.505892	0.278078	0.453273	0.245003	0.517775	0.576175	0.353916	0.659784	0.589429
A15.145.Blood	Blood/Immune	0.116248	0.909903	0.169109	0.0950702	0.813806	0.876434	0.678876	0.214297	0.853592	0.902844	0.255574	0.0500651	0.142759	0.0745867	0.296689	0.178136	0.591328	0.857953	0.618179	0.304156	0.849374	0.840021	0.748686	0.162758	0.471183	0.559313	0.268862	0.425581	0.122152	0.511549	0.139308	0.309717	0.115389	0.398285	0.00959983	0.0149074	0.920887	0.569901	0.325894	0.232052	0.627101	0.259508	0.191408	0.0615311	0.137113	0.59855	0.164819	0.398923
A15.378.316.580.Monocytes	Blood/Immune	0.83684	0.973168	0.8827	0.800075	0.832426	0.443619	0.229053	0.345416	0.817965	0.166532	0.131041	0.0430913	0.673942	0.450196	0.484262	0.600367	0.546476	0.617594	0.291924	0.169707	0.847189	0.497745	0.332161	0.381349	0.478584	0.109354	0.0847364	0.0297704	0.206579	0.202588	0.0147105	0.434158	0.349591	0.0606879	0.043091	0.145108	0.128375	0.0342775	0.0194178	0.022637	0.714528	0.110139	0.588795	0.0441249	0.347089	0.258879	0.354209	0.777302
A15.378.316.Bone.Marrow.Cells	Blood/Immune	0.470215	0.893389	0.504699	0.26912	0.833437	0.809051	0.456589	0.296882	0.650755	0.591904	0.588737	0.00472473	0.247142	0.447056	0.321818	0.1879	0.223555	0.5138	0.213397	0.0444452	0.687746	0.466796	0.268795	0.0897376	0.272509	0.420596	0.20712	0.421515	0.0101319	0.0158284	0.0121028	0.0754855	0.0541336	0.0314087	0.00239124	0.0174825	0.333585	0.224176	0.118751	0.00442192	0.532314	0.113288	0.0523381	0.0593749	0.132578	0.146405	0.139469	0.319689
A15.382.490.315.583.Neutrophils	Blood/Immune	0.449023	0.876723	0.679654	0.377714	0.642812	0.807557	0.316775	0.158351	0.483387	0.410526	0.183959	0.00193678	0.468059	0.21918	0.657578	0.606956	0.270225	0.58347	0.371333	0.059141	0.362369	0.617615	0.448767	0.274956	0.548574	0.744521	0.600874	0.866734	0.0534869	0.261759	0.0972725	0.0841937	0.0232628	0.0215526	0.00224513	0.023371	0.145738	0.362539	0.187077	0.00248362	0.0589345	0.0418494	0.00148039	0.026576	0.110474	0.164208	0.128666	0.343955
A15.382.490.555.567.537.Killer.Cells..Natural	Blood/Immune	0.0967792	0.0763032	0.0150801	0.0702002	0.0322383	0.141906	0.0855153	0.123872	0.0289995	0.090859	0.113146	0.113733	0.0644609	0.417525	0.170276	0.159241	0.315341	0.560088	0.671039	0.750218	0.0978744	0.365911	0.411544	0.371826	0.403936	0.267784	0.560035	0.229977	0.154998	0.90216	0.855076	0.684846	0.196074	0.177824	0.166051	0.206329	0.185181	0.193355	0.217001	0.262224	0.62283	0.235219	0.500307	0.0583203	0.722615	0.878123	0.469901	0.268511
A15.382.490.555.567.622.Lymphocytes..Null	Blood/Immune	0.246048	0.0885908	0.0848909	0.537055	0.17881	0.685238	0.732836	0.410779	0.189885	0.890766	0.625884	0.836881	0.49903	0.00860392	0.544574	0.844411	0.114058	0.58345	0.284567	0.53625	0.504629	0.947788	0.968067	0.896086	0.420829	0.986906	0.987477	0.993053	0.146017	0.837977	0.846708	0.866813	0.770767	0.821436	0.13618	0.150962	0.884838	0.943166	0.963666	0.825391	0.959366	0.908024	0.85444	0.721003	0.47398	0.339612	0.220939	0.356993
A15.382.490.555.567.Lymphocytes	Blood/Immune	0.196521	0.386833	0.290048	0.0744551	0.651618	0.329493	0.498224	0.800366	0.780808	0.707138	0.57506	0.243417	0.116879	0.404098	0.12346	0.0613562	0.30739	0.28259	0.282551	0.359858	0.411596	0.340026	0.373469	0.276243	0.232735	0.239191	0.169417	0.343189	0.242154	0.37482	0.464032	0.359517	0.877114	0.753111	0.777339	0.423921	0.923991	0.357146	0.367632	0.733341	0.851314	0.332555	0.73174	0.29225	0.637487	0.920342	0.653451	0.686472
A15.382.520.604.700.Spleen	Blood/Immune	0.0221113	0.163684	0.00700053	0.0172661	0.0487432	0.446321	0.0924961	0.0167682	0.00639558	0.389675	0.0293677	0.0346894	0.109463	0.0393436	0.563396	0.258221	0.531651	0.859833	0.83992	0.458739	0.124154	0.566217	0.398843	0.301503	0.575625	0.525127	0.455193	0.333466	0.320939	0.745379	0.713638	0.201346	0.166476	0.388025	0.488389	0.603047	0.376446	0.338559	0.273654	0.637052	0.506663	0.175387	0.540381	0.176046	0.0290925	0.327226	0.184391	0.0857597
A15.382.520.604.800.Palatine.Tonsil	Blood/Immune	0.128968	0.484818	0.243889	0.0708227	0.795963	0.656685	0.493292	0.57161	0.52579	0.570928	0.278281	0.149766	0.0372318	0.0539154	0.0110726	0.056197	0.464135	0.781174	0.561339	0.308487	0.750282	0.570897	0.45003	0.490161	0.354402	0.52547	0.169832	0.257976	0.230934	0.43713	0.0878869	0.213961	0.481711	0.615684	0.236283	0.222227	0.812628	0.652186	0.421729	0.564583	0.845726	0.318956	0.459126	0.424375	0.106407	0.557885	0.487656	0.158646
A15.382.680.Phagocytes	Blood/Immune	0.729061	0.953406	0.855014	0.567152	0.807791	0.793605	0.526006	0.271386	0.771662	0.490602	0.645068	0.0226888	0.616026	0.227943	0.606801	0.638342	0.121848	0.238924	0.0676726	0.023786	0.734132	0.42755	0.240383	0.0700778	0.206954	0.165457	0.0501522	0.0877802	0.0118598	0.00450697	0.00260872	0.145693	0.0171135	0.012011	0.00410409	0.0281329	0.192194	0.156401	0.0997518	0.0038981	0.401281	0.0752622	0.080139	0.0537617	0.4212	0.211899	0.25542	0.660858
A15.382.812.260.Dendritic.Cells	Blood/Immune	0.245907	0.663026	0.387839	0.226886	0.388706	0.535167	0.190634	0.284719	0.332447	0.29918	0.13708	0.153759	0.348753	0.225294	0.477135	0.546041	0.688988	0.800029	0.632627	0.506619	0.478771	0.465013	0.289286	0.165132	0.510763	0.263598	0.162746	0.233592	0.377702	0.243908	0.260536	0.727185	0.224377	0.166442	0.112851	0.242398	0.285779	0.217496	0.157587	0.139192	0.332697	0.165431	0.268018	0.248464	0.584098	0.495078	0.910953	0.93606
A15.382.812.522.Macrophages	Blood/Immune	0.463626	0.43039	0.276714	0.39024	0.0626822	0.158826	0.0720769	0.0291635	0.0637265	0.0184308	0.0320674	0.128169	0.595105	0.0556528	0.440653	0.810315	0.189406	0.260365	0.108411	0.13449	0.279602	0.425298	0.224784	0.229294	0.0930545	0.11411	0.127041	0.146418	0.151601	0.138621	0.054502	0.629949	0.0552707	0.0107243	0.0225157	0.0764402	0.0196046	0.0517291	0.0598793	0.0182763	0.0698111	0.117725	0.454507	0.256341	0.130862	0.171747	0.371913	0.48942
A15.382.812.Mononuclear.Phagocyte.System	Blood/Immune	0.365222	0.731154	0.404276	0.281845	0.501792	0.530329	0.203498	0.148936	0.551494	0.245269	0.108203	0.0424573	0.207309	0.180263	0.0671008	0.300286	0.228743	0.354587	0.165785	0.141833	0.63296	0.673417	0.382225	0.308878	0.342661	0.12788	0.12016	0.0284949	0.071492	0.137522	0.0657231	0.630644	0.492318	0.14267	0.19379	0.285811	0.120542	0.0688813	0.0335807	0.0261166	0.44863	0.110899	0.245592	0.0377031	0.406773	0.301555	0.672455	0.786996
A15.382.Immune.System	Blood/Immune	0.256624	0.607837	0.370841	0.111866	0.895909	0.412858	0.710364	0.855021	0.915575	0.692012	0.887977	0.0461351	0.266685	0.772631	0.488988	0.242471	0.138004	0.314582	0.111964	0.0700506	0.756267	0.360612	0.239649	0.253741	0.124025	0.170231	0.074617	0.439282	0.0665879	0.147622	0.129499	0.374352	0.593682	0.756078	0.254829	0.138936	0.924925	0.251313	0.25175	0.559889	0.983451	0.229791	0.505853	0.0318551	0.299487	0.662539	0.32848	0.727731
Cells_EBV-transformed_lymphocytes	Blood/Immune	0.204537	0.126952	0.0918741	0.520008	0.29967	0.0877957	0.268312	0.584949	0.286677	0.274657	0.534629	0.0771878	0.244832	0.479912	0.369562	0.451066	0.307929	0.180171	0.150596	0.690276	0.253896	0.2336	0.266033	0.312462	0.400399	0.221956	0.204286	0.0419637	0.553591	0.571699	0.782601	0.969999	0.539205	0.171281	0.132245	0.191452	0.422309	0.226777	0.279795	0.194596	0.898512	0.330239	0.846966	0.095312	0.804346	0.901164	0.428679	0.762994
Spleen	Blood/Immune	0.521198	0.881354	0.270143	0.124026	0.767361	0.338581	0.274405	0.388363	0.536396	0.458672	0.146894	0.0317231	0.50602	0.409589	0.803551	0.380645	0.719182	0.763944	0.507981	0.194739	0.583123	0.168304	0.078077	0.126013	0.583589	0.106605	0.0618399	0.0345565	0.146007	0.425916	0.127208	0.0590537	0.173648	0.232508	0.0411317	0.0903083	0.58927	0.134672	0.0514768	0.125075	0.672887	0.119076	0.381857	0.0491025	0.341812	0.58164	0.407722	0.566905
Whole_Blood	Blood/Immune	0.582548	0.951642	0.542356	0.839464	0.502658	0.567551	0.474981	0.173355	0.560864	0.428818	0.307458	0.200881	0.95164	0.359347	0.972711	0.971605	0.995142	0.999009	0.998611	0.938162	0.893682	0.605122	0.578665	0.641138	0.996022	0.593742	0.61332	0.541736	0.946276	0.860038	0.646097	0.539444	0.0472739	0.555671	0.212521	0.546401	0.630896	0.325765	0.140297	0.459799	0.757335	0.560125	0.730647	0.132176	0.543298	0.357211	0.569851	0.602375
A08.186.211.132.810.428.200.Cerebellum	CNS	0.678232	0.581277	0.683987	0.51009	0.78248	0.0757056	0.319933	0.674585	0.50952	0.120439	0.332961	0.343714	0.314024	0.828436	0.330855	0.102201	0.674965	0.66345	0.791847	0.833726	0.38776	0.0365044	0.0618034	0.0114235	0.183166	0.0324747	0.0609895	0.0052625	0.454836	0.864925	0.887706	0.463839	0.745629	0.343699	0.946181	0.906978	0.488564	0.0629419	0.130103	0.747143	0.790105	0.125258	0.568358	0.267348	0.84413	0.921597	0.960593	0.486473
A08.186.211.132.Brain.Stem	CNS	0.837445	0.75614	0.929885	0.647082	0.96415	0.050094	0.434814	0.977049	0.897228	0.168559	0.595866	0.374023	0.201694	0.784324	0.0984966	0.0164618	0.72659	0.421335	0.715974	0.769154	0.548814	0.00825682	0.0167352	0.0275745	0.155954	0.00815205	0.0219198	0.00334319	0.34946	0.755269	0.747441	0.278106	0.978535	0.43912	0.940288	0.942422	0.591308	0.0248632	0.0722118	0.769211	0.634775	0.0675716	0.568773	0.273581	0.541385	0.975913	0.970187	0.593934
A08.186.211.464.405.Hippocampus	CNS	0.774152	0.693229	0.685791	0.788119	0.984028	0.8945	0.943166	0.957454	0.636449	0.878422	0.542126	0.756137	0.37513	0.787913	0.334709	0.292725	0.25719	0.497243	0.457644	0.232424	0.921352	0.853115	0.799589	0.493835	0.39276	0.721714	0.756659	0.19961	0.0821108	0.251661	0.27766	0.191329	0.959463	0.901967	0.950591	0.914271	0.871724	0.758547	0.850311	0.669557	0.698833	0.612467	0.559772	0.478418	0.650104	0.753264	0.78811	0.84465
A08.186.211.464.710.225.Entorhinal.Cortex	CNS	0.60766	0.50299	0.346195	0.508793	0.964531	0.89544	0.888146	0.91773	0.410581	0.880064	0.32999	0.75331	0.304504	0.730572	0.186296	0.329823	0.234183	0.533622	0.442475	0.190718	0.860122	0.82516	0.743307	0.405027	0.453159	0.78591	0.772283	0.273113	0.106152	0.329335	0.281636	0.247469	0.911608	0.957665	0.994226	0.938821	0.887822	0.826069	0.832465	0.748157	0.583962	0.632989	0.283022	0.438971	0.58664	0.813901	0.752417	0.816591
A08.186.211.464.Limbic.System	CNS	0.80331	0.736992	0.682433	0.725753	0.990526	0.907394	0.950168	0.979223	0.75256	0.945618	0.58689	0.79828	0.364379	0.865644	0.189611	0.237141	0.386153	0.531347	0.504779	0.210484	0.929769	0.861677	0.844664	0.672423	0.582737	0.786382	0.818721	0.144608	0.217676	0.37712	0.339805	0.30069	0.989601	0.979259	0.997728	0.975657	0.915235	0.792742	0.820649	0.749027	0.657605	0.66473	0.352468	0.455821	0.792158	0.890866	0.887061	0.913292
A08.186.211.653.Mesencephalon	CNS	0.430557	0.792783	0.660055	0.174674	0.96227	0.685666	0.884234	0.843001	0.769125	0.861846	0.950479	0.652634	0.174108	0.326795	0.175489	0.18859	0.628003	0.804812	0.547272	0.494929	0.933339	0.4156	0.342778	0.302014	0.655585	0.346552	0.448752	0.369102	0.22906	0.463212	0.272559	0.406569	0.53467	0.750193	0.814055	0.626772	0.829998	0.557505	0.496786	0.777357	0.853148	0.511594	0.655848	0.356559	0.253756	0.472371	0.524787	0.502459
A08.186.211.730.317.357.352.435.Hypothalamo.Hypophyseal.System	CNS	0.337858	0.726101	0.81031	0.0784993	0.918555	0.431425	0.752862	0.924392	0.929795	0.69688	0.98444	0.490468	0.0741363	0.760874	0.0199361	0.0579727	0.104514	0.154279	0.120972	0.0459315	0.819811	0.467592	0.548196	0.800554	0.132422	0.229495	0.31279	0.409977	0.0515015	0.12009	0.19237	0.0396611	0.759351	0.682824	0.690641	0.62879	0.585853	0.116833	0.279124	0.425754	0.829104	0.292402	0.341874	0.151954	0.376823	0.912523	0.789722	0.368993
A08.186.211.730.317.357.Hypothalamus	CNS	0.469557	0.935703	0.941901	0.13649	0.99836	0.665778	0.90925	0.989395	0.993828	0.867104	0.996862	0.445985	0.153806	0.459217	0.025888	0.0642369	0.192432	0.282529	0.205286	0.214697	0.951577	0.512826	0.520579	0.711338	0.208296	0.267155	0.448644	0.782271	0.0733301	0.154151	0.342802	0.265993	0.94232	0.815842	0.862178	0.629863	0.816113	0.165605	0.246518	0.535953	0.968577	0.35449	0.712601	0.243625	0.409523	0.912049	0.953629	0.5924
A08.186.211.730.317.Diencephalon	CNS	0.138671	0.779378	0.960191	0.0979319	0.984868	0.561088	0.959914	0.954024	0.99544	0.838078	0.999853	0.789229	0.102301	0.216054	0.100976	0.161357	0.167399	0.394744	0.29333	0.298499	0.878923	0.474756	0.562603	0.524893	0.306348	0.484925	0.638281	0.953129	0.0843696	0.222529	0.399698	0.320188	0.389183	0.458443	0.685591	0.504346	0.466349	0.269399	0.39386	0.489201	0.991099	0.432233	0.865053	0.516591	0.0864017	0.712266	0.614299	0.342187
A08.186.211.730.885.287.249.487.Corpus.Striatum	CNS	0.229417	0.723149	0.926173	0.423429	0.856933	0.828367	0.820532	0.84893	0.916158	0.584999	0.85465	0.394287	0.163475	0.29777	0.130869	0.0892107	0.914977	0.99619	0.978904	0.754212	0.832504	0.87031	0.849884	0.763764	0.96937	0.880401	0.747598	0.766531	0.375262	0.879613	0.474988	0.41565	0.645827	0.14316	0.580795	0.860054	0.322305	0.361977	0.258289	0.332481	0.746542	0.118288	0.704532	0.488146	0.143313	0.827609	0.975763	0.853364
A08.186.211.730.885.287.249.Basal.Ganglia	CNS	0.438468	0.7668	0.824158	0.43135	0.921033	0.74283	0.907352	0.909634	0.888859	0.760686	0.862283	0.688811	0.0710251	0.658796	0.0443624	0.0398841	0.80301	0.963819	0.910342	0.548817	0.915671	0.833457	0.825587	0.640249	0.846831	0.796319	0.57216	0.496433	0.420188	0.828666	0.331825	0.385051	0.798224	0.392478	0.715557	0.780959	0.524283	0.602367	0.635056	0.607734	0.898758	0.460778	0.893807	0.842123	0.368273	0.811366	0.957318	0.895076
A08.186.211.730.885.287.500.270.Frontal.Lobe	CNS	0.891869	0.591832	0.692152	0.840888	0.918127	0.867079	0.935195	0.914231	0.853008	0.933535	0.863824	0.633732	0.471693	0.973513	0.506839	0.655591	0.180894	0.418859	0.300093	0.282312	0.839861	0.86933	0.954549	0.831913	0.633839	0.877854	0.954037	0.574588	0.11271	0.470622	0.377639	0.271947	0.99008	0.895447	0.990058	0.982698	0.804771	0.694997	0.810593	0.777924	0.631115	0.734223	0.572736	0.386397	0.791567	0.84667	0.561168	0.669638
A08.186.211.730.885.287.500.571.735.Visual.Cortex	CNS	0.987491	0.775292	0.652541	0.903708	0.995087	0.898344	0.980762	0.985233	0.798239	0.825396	0.748718	0.161576	0.47255	0.99845	0.378437	0.147406	0.393092	0.302483	0.428233	0.373414	0.981851	0.83687	0.880649	0.817078	0.503956	0.406795	0.482874	0.0127641	0.474012	0.39434	0.509418	0.28702	0.993926	0.917813	0.853453	0.794239	0.931222	0.651822	0.788938	0.79245	0.946763	0.694817	0.87108	0.265346	0.955572	0.730389	0.786454	0.813124
A08.186.211.730.885.287.500.670.Parietal.Lobe	CNS	0.446236	0.279276	0.363979	0.582876	0.690483	0.74625	0.830789	0.296411	0.353653	0.771383	0.639532	0.842356	0.177747	0.732678	0.230779	0.47307	0.1862	0.44896	0.429171	0.517756	0.852731	0.888615	0.867731	0.60922	0.303419	0.585942	0.454136	0.0580518	0.212657	0.459429	0.274792	0.464325	0.899657	0.919013	0.973915	0.954742	0.770794	0.862213	0.837566	0.800985	0.71477	0.831431	0.874525	0.58672	0.787836	0.872371	0.777465	0.83712
A08.186.211.730.885.287.500.Cerebral.Cortex	CNS	0.677669	0.575982	0.451183	0.4573	0.991057	0.893305	0.963423	0.981542	0.623012	0.959652	0.667616	0.821707	0.178076	0.909872	0.136063	0.128948	0.197759	0.382841	0.372131	0.143747	0.937101	0.79113	0.772631	0.578426	0.438995	0.616161	0.643819	0.0929289	0.125637	0.332242	0.338791	0.238104	0.977142	0.981074	0.998107	0.953926	0.930422	0.788636	0.829247	0.846596	0.762472	0.624309	0.411262	0.40876	0.780925	0.82542	0.767461	0.834982
A08.186.211.865.428.Metencephalon	CNS	0.710423	0.669647	0.787919	0.512784	0.871102	0.0900949	0.431023	0.814879	0.688364	0.235052	0.308575	0.433043	0.268801	0.879455	0.30243	0.0549084	0.718724	0.69493	0.855549	0.81188	0.418457	0.0284313	0.0577786	0.0247098	0.23545	0.0271786	0.0763935	0.00358784	0.364633	0.884093	0.880133	0.330442	0.893689	0.490738	0.924989	0.910705	0.591257	0.0549964	0.119064	0.691189	0.748469	0.106361	0.445984	0.191465	0.686627	0.907244	0.919494	0.323262
A08.186.211.Brain	CNS	0.722869	0.538512	0.52378	0.650496	0.918208	0.760429	0.836002	0.832358	0.346638	0.71832	0.386174	0.585793	0.355461	0.527204	0.250434	0.231614	0.49429	0.688119	0.693695	0.476525	0.718437	0.61948	0.600709	0.401758	0.495152	0.492416	0.612751	0.126554	0.258423	0.633163	0.459279	0.18028	0.813005	0.75777	0.983546	0.919425	0.613953	0.5645	0.653238	0.723801	0.451694	0.549187	0.683361	0.307262	0.391604	0.839247	0.709461	0.632235
A09.371.729.Retina	CNS	0.1579	0.179255	0.285343	0.214065	0.478917	0.235	0.478537	0.827658	0.339444	0.199611	0.750506	0.484502	0.0814757	0.515265	0.107945	0.0560992	0.0270933	0.0725297	0.155638	0.15471	0.135551	0.152276	0.271888	0.14528	0.113988	0.150935	0.161577	0.129379	0.0436015	0.183274	0.433881	0.214407	0.73455	0.313116	0.873975	0.928981	0.401675	0.117791	0.120968	0.271785	0.450546	0.0845627	0.311667	0.064336	0.971453	0.912745	0.964987	0.962668
A11.872.653.Neural.Stem.Cells	CNS	0.578509	0.235229	0.359476	0.875345	0.141396	0.0636682	0.157528	0.245731	0.243902	0.1295	0.122337	0.0548917	0.787067	0.458236	0.419107	0.622386	0.74497	0.413821	0.529311	0.625893	0.154873	0.165073	0.573071	0.619435	0.347231	0.0985339	0.113088	0.0339128	0.668718	0.326759	0.0595335	0.0525025	0.301684	0.531784	0.535513	0.436836	0.320721	0.154865	0.191189	0.560513	0.680416	0.392175	0.656248	0.191943	0.157024	0.0982735	0.115453	0.147744
Brain_Amygdala	CNS	0.840758	0.746602	0.833508	0.835957	0.489483	0.294204	0.182237	0.337223	0.42885	0.168748	0.127692	0.270918	0.493043	0.700302	0.193477	0.217349	0.570557	0.775121	0.674085	0.239288	0.43626	0.453371	0.408029	0.36224	0.718729	0.432336	0.749523	0.0562836	0.292153	0.684774	0.129344	0.0170253	0.648999	0.0607195	0.150239	0.398848	0.0636379	0.219126	0.317435	0.165445	0.0865019	0.156389	0.263165	0.475036	0.344055	0.696009	0.458183	0.0551901
Brain_Anterior_cingulate_cortex_(BA24)	CNS	0.668362	0.549384	0.35873	0.453284	0.501196	0.181576	0.134757	0.394369	0.167831	0.164444	0.0600108	0.476669	0.144458	0.687391	0.0887343	0.0966429	0.428767	0.612803	0.651645	0.223687	0.261219	0.202749	0.222744	0.110835	0.285394	0.198892	0.503423	0.00859637	0.114648	0.39618	0.101047	0.013025	0.932173	0.548719	0.7879	0.838586	0.339528	0.143124	0.298229	0.507786	0.223019	0.245794	0.569371	0.334423	0.302045	0.746212	0.241982	0.0703299
Brain_Caudate_(basal_ganglia)	CNS	0.443437	0.729587	0.80945	0.460615	0.872339	0.512583	0.850312	0.944985	0.782966	0.843085	0.732586	0.622307	0.0438299	0.402043	0.00506364	0.0222126	0.477858	0.831009	0.755221	0.265587	0.849936	0.538182	0.645656	0.42139	0.755755	0.586995	0.668973	0.0142848	0.173966	0.636085	0.141618	0.0220683	0.925433	0.62254	0.546211	0.600308	0.716117	0.597411	0.743961	0.722986	0.757269	0.56803	0.538277	0.704179	0.251951	0.720098	0.341246	0.232965
Brain_Cerebellar_Hemisphere	CNS	0.751058	0.659712	0.797374	0.776807	0.844543	0.210164	0.471354	0.806356	0.772052	0.278306	0.520528	0.34648	0.68579	0.682401	0.768665	0.624782	0.512894	0.319796	0.36828	0.558876	0.565914	0.108245	0.0331797	0.109634	0.0898034	0.0217815	0.0540686	0.00268705	0.369357	0.470437	0.456011	0.454606	0.562386	0.378748	0.500019	0.5575	0.536742	0.108128	0.249383	0.725109	0.649611	0.199615	0.440344	0.208253	0.614641	0.893158	0.836389	0.666272
Brain_Cerebellum	CNS	0.691526	0.68936	0.863683	0.702757	0.877365	0.292069	0.665159	0.838274	0.79186	0.234551	0.678666	0.25627	0.526645	0.621311	0.501625	0.39831	0.387235	0.24062	0.344391	0.460145	0.646412	0.166714	0.10453	0.223939	0.125109	0.0718384	0.202838	0.0323524	0.276243	0.405328	0.422493	0.292482	0.590806	0.345904	0.482315	0.44224	0.492202	0.0836048	0.196345	0.486744	0.71352	0.137438	0.368837	0.189282	0.619376	0.920038	0.839496	0.656312
Brain_Cortex	CNS	0.7591	0.730644	0.740516	0.745517	0.786539	0.324389	0.343103	0.661185	0.48025	0.345221	0.195597	0.337341	0.418052	0.537871	0.23124	0.378194	0.48502	0.695909	0.705373	0.331635	0.623791	0.385683	0.433325	0.485597	0.448705	0.261117	0.657755	0.0226148	0.225572	0.520806	0.179236	0.0599588	0.944452	0.627299	0.904417	0.878067	0.428337	0.205112	0.409509	0.549887	0.396005	0.347065	0.484602	0.305536	0.186646	0.365347	0.10499	0.0619889
Brain_Frontal_Cortex_(BA9)	CNS	0.553577	0.466459	0.498117	0.512255	0.606932	0.208195	0.270828	0.721344	0.374853	0.267184	0.236126	0.393264	0.218536	0.691843	0.263612	0.198347	0.3113	0.531037	0.523576	0.288573	0.314636	0.206416	0.206306	0.121803	0.252538	0.169513	0.409721	0.0138083	0.120851	0.377147	0.216243	0.0908877	0.959974	0.716148	0.850075	0.817795	0.460048	0.187655	0.307842	0.621011	0.37581	0.296102	0.490592	0.260421	0.487767	0.649813	0.196061	0.11405
Brain_Hippocampus	CNS	0.447173	0.50591	0.486855	0.383111	0.588313	0.301252	0.34456	0.575662	0.244791	0.19142	0.0771316	0.409784	0.160135	0.480496	0.0652621	0.0456177	0.34946	0.716389	0.560183	0.214209	0.620376	0.461731	0.477309	0.457091	0.467273	0.440601	0.624953	0.0653665	0.133901	0.567017	0.242093	0.0566489	0.458507	0.102927	0.145509	0.393412	0.161366	0.225106	0.326745	0.257739	0.0426734	0.125385	0.119451	0.33523	0.640134	0.783614	0.719999	0.451279
Brain_Hypothalamus	CNS	0.803941	0.700058	0.691188	0.646449	0.750228	0.230628	0.327374	0.702731	0.65762	0.268644	0.169324	0.47149	0.278665	0.205909	0.112717	0.0956988	0.4763	0.622776	0.717053	0.489832	0.409812	0.202329	0.267958	0.357251	0.550381	0.1912	0.5213	0.0490908	0.318389	0.748079	0.620518	0.17505	0.852578	0.329183	0.291113	0.424155	0.316517	0.177007	0.296026	0.419298	0.118875	0.211567	0.529369	0.333293	0.548583	0.70936	0.528536	0.155409
Brain_Nucleus_accumbens_(basal_ganglia)	CNS	0.766168	0.787323	0.79435	0.759071	0.765798	0.344789	0.578255	0.75954	0.709308	0.661632	0.463064	0.468222	0.0955027	0.539892	0.0200041	0.0711382	0.44579	0.71604	0.644631	0.363154	0.700714	0.453343	0.640377	0.567329	0.581975	0.409099	0.693871	0.0191136	0.166409	0.390544	0.112078	0.0292572	0.978283	0.671888	0.811872	0.855196	0.457928	0.349172	0.603284	0.504518	0.512332	0.578546	0.764136	0.650568	0.129641	0.533567	0.210606	0.141261
Brain_Putamen_(basal_ganglia)	CNS	0.468059	0.704543	0.749805	0.666724	0.815613	0.552387	0.734608	0.886964	0.69731	0.646024	0.462274	0.55729	0.107927	0.487583	0.00434846	0.0404636	0.52181	0.831858	0.669093	0.282115	0.849715	0.705827	0.75425	0.573369	0.715642	0.665044	0.684395	0.0422906	0.196425	0.608714	0.126166	0.0337141	0.779008	0.352147	0.495789	0.702116	0.481412	0.468002	0.539815	0.498003	0.456475	0.316457	0.345134	0.481128	0.221864	0.654485	0.387589	0.296811
Brain_Spinal_cord_(cervical_c-1)	CNS	0.229979	0.446871	0.71825	0.291169	0.605378	0.142454	0.615787	0.712208	0.743098	0.298802	0.501511	0.221679	0.352691	0.300381	0.496945	0.284315	0.0769676	0.0623758	0.103471	0.0855994	0.368812	0.0775985	0.152533	0.104524	0.22131	0.0670796	0.259375	0.0708765	0.150072	0.161289	0.170146	0.20688	0.333023	0.22491	0.126119	0.18825	0.46161	0.211552	0.278521	0.396862	0.393634	0.226577	0.208717	0.346512	0.294217	0.376303	0.436585	0.343937
Brain_Substantia_nigra	CNS	0.148084	0.269947	0.320353	0.315994	0.42668	0.172596	0.404148	0.574559	0.259762	0.190178	0.112113	0.657616	0.10969	0.124226	0.0898197	0.0852453	0.245453	0.365288	0.430065	0.412996	0.354751	0.197469	0.231387	0.428524	0.33124	0.128014	0.449609	0.04639	0.214583	0.674381	0.323923	0.142201	0.702372	0.251033	0.393291	0.512723	0.284044	0.147266	0.255913	0.577645	0.137055	0.156643	0.261993	0.410755	0.17825	0.547921	0.449418	0.14468
A07.231.114.Arteries	Cardiovascular	0.231037	0.472847	0.823466	0.539688	0.799001	0.779906	0.941996	0.986735	0.905202	0.887311	0.997524	0.601003	0.446663	0.773662	0.627503	0.839858	0.682031	0.531986	0.611057	0.853041	0.894307	0.768596	0.75434	0.948315	0.670635	0.433004	0.651598	0.447863	0.799365	0.754783	0.696303	0.946582	0.820376	0.993167	0.954776	0.708869	0.957172	0.791812	0.732861	0.93217	0.810366	0.880639	0.726098	0.668225	0.331392	0.169847	0.233576	0.613259
A07.231.908.670.874.Umbilical.Veins	Cardiovascular	0.42533	0.274518	0.660873	0.92321	0.554844	0.871822	0.463694	0.524833	0.761177	0.826637	0.26348	0.938553	0.768726	0.431945	0.542675	0.939056	0.620332	0.554954	0.522627	0.634908	0.461961	0.875734	0.851814	0.592725	0.673037	0.950797	0.860125	0.836839	0.832437	0.51526	0.226655	0.693858	0.706993	0.84222	0.568165	0.354004	0.800601	0.966048	0.807804	0.604109	0.310816	0.844953	0.646614	0.917302	0.378713	0.218127	0.372744	0.744213
A07.231.908.Veins	Cardiovascular	0.538454	0.342536	0.630173	0.926605	0.75127	0.920264	0.534046	0.706175	0.761256	0.886897	0.363384	0.909531	0.821132	0.448201	0.487307	0.971253	0.505877	0.476855	0.342023	0.58372	0.584699	0.870065	0.826363	0.696859	0.511837	0.914136	0.758147	0.801373	0.744073	0.519913	0.302329	0.870541	0.659582	0.926481	0.553944	0.247221	0.877255	0.964342	0.816295	0.624639	0.589712	0.94347	0.79713	0.919297	0.586104	0.503943	0.629898	0.940711
A07.231.Blood.Vessels	Cardiovascular	0.23197	0.242521	0.542082	0.654074	0.659525	0.721642	0.373205	0.863165	0.69218	0.808559	0.421741	0.74094	0.439905	0.566634	0.615073	0.886425	0.513673	0.428013	0.44413	0.479006	0.394979	0.711683	0.649116	0.429626	0.510973	0.831419	0.771268	0.652968	0.71298	0.42159	0.356492	0.694934	0.684857	0.95141	0.716675	0.441455	0.915071	0.929125	0.750589	0.607732	0.404565	0.8781	0.591697	0.907086	0.700659	0.683888	0.683156	0.939313
A07.541.358.100.Atrial.Appendage	Cardiovascular	0.470854	0.444414	0.774074	0.339902	0.737094	0.619619	0.895152	0.818177	0.85743	0.897327	0.980349	0.743494	0.624503	0.265786	0.162223	0.823532	0.126125	0.173818	0.138653	0.419928	0.216205	0.443817	0.50859	0.325744	0.132491	0.648224	0.388371	0.787176	0.120765	0.104232	0.221097	0.507887	0.816749	0.912389	0.505548	0.275095	0.825344	0.796773	0.774175	0.842206	0.900574	0.715686	0.156329	0.497996	0.136051	0.108305	0.284628	0.0740616
A07.541.358.Heart.Atria	Cardiovascular	0.527607	0.564156	0.821342	0.356496	0.791488	0.623803	0.890241	0.867961	0.916205	0.913819	0.991329	0.786405	0.635135	0.094434	0.110089	0.770963	0.246888	0.205125	0.174375	0.512746	0.390266	0.486494	0.481812	0.437232	0.15475	0.553018	0.221226	0.590486	0.197588	0.107067	0.146771	0.538238	0.780286	0.93942	0.62815	0.267895	0.894521	0.82818	0.82877	0.911609	0.938325	0.794433	0.258456	0.60654	0.0702443	0.0734254	0.241676	0.0480481
A07.541.510.110.Aortic.Valve	Cardiovascular	0.562426	0.740309	0.342348	0.314596	0.551047	0.659021	0.76238	0.901476	0.682187	0.498324	0.632081	0.461275	0.256016	0.31003	0.126086	0.0954288	0.678016	0.76944	0.767511	0.631889	0.701964	0.728707	0.739811	0.946537	0.945036	0.631673	0.714365	0.536138	0.670264	0.830404	0.870033	0.827092	0.975668	0.453914	0.589901	0.938661	0.426647	0.408721	0.543283	0.461783	0.502195	0.418383	0.789041	0.52606	0.838687	0.666939	0.578815	0.97446
A07.541.560.Heart.Ventricles	Cardiovascular	0.892472	0.657836	0.911793	0.757459	0.717059	0.778422	0.878051	0.593467	0.928195	0.915678	0.991596	0.982479	0.930958	0.516547	0.478853	0.914234	0.639962	0.840293	0.627178	0.586037	0.533259	0.82236	0.904049	0.849478	0.595831	0.951666	0.968984	0.998768	0.496332	0.738552	0.43397	0.36867	0.695552	0.515646	0.491393	0.318303	0.559436	0.810168	0.89728	0.662488	0.901948	0.753591	0.725766	0.784152	0.14349	0.35807	0.136368	0.0852914
A07.541.Heart	Cardiovascular	0.796448	0.672718	0.891694	0.546993	0.773885	0.819176	0.915022	0.754192	0.931448	0.944223	0.983817	0.961388	0.815815	0.489335	0.373627	0.811874	0.380712	0.732124	0.410887	0.22563	0.612207	0.828298	0.928231	0.822565	0.524931	0.961567	0.975626	0.996852	0.17453	0.462706	0.155233	0.109913	0.811373	0.664265	0.646643	0.43728	0.654064	0.863498	0.906912	0.68213	0.831996	0.775088	0.568631	0.790496	0.0723217	0.275855	0.130299	0.0671183
Artery_Aorta	Cardiovascular	0.573537	0.265867	0.42946	0.646848	0.276224	0.259584	0.338802	0.749851	0.350201	0.246038	0.58053	0.679845	0.434772	0.697942	0.400602	0.600551	0.405343	0.0921803	0.282403	0.621146	0.340626	0.442291	0.38198	0.486033	0.152693	0.277651	0.31992	0.197704	0.609873	0.60596	0.799967	0.917049	0.730566	0.738415	0.805733	0.685286	0.38444	0.610136	0.52301	0.516418	0.325403	0.680681	0.560004	0.793863	0.992389	0.760033	0.769291	0.980274
Artery_Coronary	Cardiovascular	0.411375	0.0508667	0.145357	0.334464	0.0152679	0.0292633	0.0185416	0.463926	0.0314649	0.0375721	0.213333	0.270905	0.183122	0.409513	0.142079	0.141299	0.193923	0.0575563	0.186704	0.405193	0.0209967	0.0894082	0.0606271	0.171198	0.0578018	0.0772173	0.405376	0.04801	0.415273	0.736204	0.645974	0.453711	0.626371	0.207677	0.537643	0.6439	0.0559871	0.165771	0.176807	0.239527	0.127605	0.342137	0.422356	0.436518	0.697209	0.63324	0.331785	0.744978
Artery_Tibial	Cardiovascular	0.770791	0.0868904	0.155194	0.552386	0.0834385	0.0201739	0.0601194	0.806058	0.154423	0.062541	0.463994	0.571357	0.322502	0.722304	0.282392	0.472409	0.0895344	0.0033568	0.0210135	0.35521	0.059756	0.0550479	0.0649154	0.313915	0.0118466	0.0268909	0.0922652	0.0785711	0.52121	0.416629	0.475322	0.722268	0.918191	0.641056	0.923037	0.779982	0.225322	0.206689	0.28616	0.547237	0.554227	0.49128	0.739578	0.430507	0.93257	0.849312	0.642122	0.767504
Heart_Atrial_Appendage	Cardiovascular	0.701405	0.639457	0.64677	0.376711	0.754184	0.576382	0.87084	0.940549	0.831911	0.832549	0.950781	0.969957	0.651975	0.743298	0.695971	0.779871	0.404568	0.21337	0.348872	0.511947	0.293711	0.344026	0.394424	0.343988	0.206898	0.46629	0.642874	0.653985	0.265587	0.391519	0.388086	0.628253	0.822995	0.815896	0.588036	0.421705	0.825575	0.45387	0.557377	0.798656	0.655127	0.283998	0.0876366	0.39309	0.439821	0.579015	0.554723	0.267243
Heart_Left_Ventricle	Cardiovascular	0.576749	0.326911	0.347111	0.43233	0.48724	0.703347	0.895734	0.688828	0.627325	0.947447	0.972088	0.729906	0.504088	0.466705	0.273396	0.602185	0.190445	0.0795184	0.0616036	0.192121	0.105099	0.457065	0.537119	0.059538	0.0934023	0.780318	0.71577	0.754467	0.220653	0.0896424	0.158137	0.670691	0.463122	0.747285	0.195407	0.049855	0.765817	0.922942	0.930073	0.43836	0.516442	0.570125	0.144562	0.463409	0.183056	0.123152	0.378192	0.214661
A03.556.124.369.Intestinal.Mucosa	Digestive	0.712101	0.805972	0.506556	0.694573	0.205969	0.37214	0.132816	0.118976	0.509201	0.339609	0.262633	0.351098	0.767686	0.207915	0.407787	0.871493	0.936318	0.82549	0.907373	0.930071	0.279309	0.337051	0.266749	0.267042	0.85118	0.353021	0.637605	0.314631	0.965367	0.689878	0.775142	0.885418	0.505504	0.352323	0.709866	0.392888	0.235143	0.12495	0.163671	0.166446	0.174465	0.0977999	0.112431	0.0832887	0.674737	0.65187	0.684797	0.539344
A03.556.124.526.767.Rectum	Digestive	0.527471	0.499568	0.702927	0.633842	0.387142	0.0128855	0.298487	0.428259	0.64592	0.0877071	0.486963	0.202297	0.806315	0.193581	0.846561	0.94771	0.937628	0.375787	0.725893	0.925713	0.385325	0.0132512	0.00514293	0.16621	0.595381	0.00447007	0.0938349	0.22134	0.998758	0.554591	0.441395	0.873689	0.67165	0.515345	0.9363	0.728508	0.111056	0.012487	0.0729122	0.634144	0.132427	0.201964	0.506787	0.246359	0.862885	0.594752	0.561167	0.483288
A03.556.124.684.Intestine..Small	Digestive	0.934706	0.971994	0.791114	0.58536	0.698669	0.176204	0.565541	0.457366	0.837534	0.652043	0.906349	0.628959	0.862011	0.489488	0.433776	0.496796	0.9396	0.434398	0.727605	0.954121	0.493877	0.0500641	0.0438541	0.105945	0.480317	0.0143586	0.145488	0.173572	0.983316	0.159319	0.11671	0.781891	0.609258	0.471384	0.736008	0.319657	0.290567	0.10491	0.357685	0.651829	0.330762	0.511583	0.833858	0.525974	0.630028	0.109081	0.144213	0.265406
A03.556.124.Intestines	Digestive	0.460693	0.343837	0.0724085	0.558192	0.0424004	0.281282	0.191725	0.0228893	0.0515999	0.178875	0.29689	0.445559	0.876633	0.0713549	0.799292	0.982382	0.943716	0.665105	0.798093	0.973951	0.15722	0.228643	0.12269	0.29405	0.888471	0.235556	0.581951	0.489956	0.998604	0.68924	0.505341	0.962851	0.122326	0.429716	0.842747	0.566478	0.16004	0.245793	0.451904	0.516034	0.274568	0.519997	0.860851	0.317423	0.620863	0.311245	0.304983	0.288632
A03.556.249.124.Ileum	Digestive	0.812472	0.837482	0.632168	0.515782	0.185674	0.199744	0.377792	0.0656287	0.646236	0.650056	0.857971	0.472195	0.879074	0.570208	0.443215	0.727229	0.9722	0.727077	0.897791	0.992192	0.118745	0.0857641	0.128112	0.0875472	0.72904	0.227129	0.39224	0.408746	0.96774	0.291977	0.170809	0.73816	0.378519	0.33626	0.450598	0.164496	0.297073	0.277045	0.503198	0.657626	0.60519	0.552748	0.823616	0.635522	0.531183	0.0560932	0.035693	0.326094
A03.556.249.249.209.Cecum	Digestive	0.415422	0.518866	0.4265	0.435155	0.331895	0.267058	0.426098	0.210327	0.463351	0.280455	0.595843	0.0474011	0.82432	0.090891	0.967842	0.978229	0.864377	0.579748	0.721766	0.901169	0.415044	0.258864	0.176789	0.403833	0.733242	0.13036	0.740398	0.306898	0.995909	0.562824	0.683299	0.970389	0.590184	0.548098	0.662836	0.556844	0.27804	0.0592154	0.0768069	0.190511	0.129929	0.192465	0.429955	0.0197141	0.467799	0.19359	0.383601	0.257694
A03.556.249.249.356.668.Colon..Sigmoid	Digestive	0.20495	0.433109	0.192837	0.207	0.0795323	0.254867	0.258798	0.0101007	0.0916627	0.194875	0.285708	0.781686	0.540859	0.13687	0.731215	0.763554	0.861006	0.485921	0.619195	0.633958	0.113399	0.086507	0.0422213	0.100934	0.580893	0.111689	0.357961	0.510144	0.968701	0.292179	0.254488	0.625147	0.107264	0.53385	0.964254	0.614891	0.114887	0.12298	0.400754	0.710637	0.23457	0.567574	0.932592	0.341816	0.0666021	0.166908	0.152225	0.0895463
A03.556.249.249.356.Colon	Digestive	0.259895	0.230743	0.0334514	0.260682	0.0222854	0.198599	0.170562	0.0128483	0.0142047	0.0906089	0.155004	0.588879	0.69039	0.0851715	0.9449	0.947038	0.904395	0.622903	0.757262	0.967986	0.0604335	0.139509	0.13597	0.158461	0.834795	0.231774	0.793109	0.603412	0.998296	0.725532	0.643983	0.94205	0.155483	0.328981	0.966808	0.805303	0.0529112	0.106922	0.26185	0.395819	0.0456696	0.251253	0.712926	0.242875	0.541343	0.121831	0.337136	0.175764
A03.556.500.760.464.Parotid.Gland	Digestive	0.371797	0.0655392	0.554275	0.241146	0.271142	0.0584086	0.488417	0.765652	0.739548	0.270741	0.992406	0.196667	0.443206	0.198457	0.230675	0.331497	0.177825	0.0393879	0.0906862	0.542624	0.140399	0.0645383	0.120891	0.0780901	0.036417	0.0693637	0.0690179	0.156795	0.389721	0.0725378	0.428109	0.557394	0.566612	0.277806	0.43248	0.22072	0.31791	0.130817	0.137329	0.343408	0.883494	0.240067	0.618969	0.213399	0.926238	0.317758	0.737098	0.616671
A03.556.500.760.Salivary.Glands	Digestive	0.42786	0.142915	0.56136	0.263814	0.398583	0.0355717	0.413364	0.785689	0.75768	0.208193	0.96871	0.121442	0.413016	0.237082	0.324551	0.275757	0.212015	0.0208498	0.0994848	0.58414	0.225117	0.0256601	0.0582472	0.0938617	0.0247497	0.0211635	0.02829	0.081401	0.335824	0.0643236	0.370934	0.528017	0.349196	0.197067	0.13026	0.0741367	0.326052	0.0785014	0.0750389	0.27141	0.886201	0.143373	0.461244	0.171786	0.93197	0.436403	0.803693	0.597379
A03.556.875.500.Esophagus	Digestive	0.329304	0.234779	0.147794	0.146217	0.0899944	0.165253	0.122866	0.0117517	0.0623207	0.0973486	0.156088	0.509024	0.288322	0.434402	0.731399	0.337024	0.770955	0.571444	0.70198	0.754051	0.2235	0.230766	0.152437	0.5309	0.914645	0.397278	0.880977	0.88623	0.969814	0.640797	0.628643	0.719595	0.408082	0.332609	0.938436	0.903516	0.064252	0.219773	0.332026	0.620943	0.0575196	0.532027	0.763019	0.658773	0.781993	0.231216	0.0558848	0.0490429
A03.556.875.875.Stomach	Digestive	0.567545	0.402774	0.269846	0.266941	0.0435647	0.0421478	0.0822014	0.0116312	0.219624	0.0485406	0.569202	0.421987	0.192712	0.397158	0.212267	0.115897	0.309327	0.13119	0.141365	0.493956	0.162058	0.100605	0.0732197	0.673144	0.141588	0.094423	0.332329	0.706841	0.42169	0.119834	0.164545	0.388569	0.474821	0.190485	0.425784	0.386608	0.0299338	0.0564694	0.0578639	0.136245	0.0150687	0.0716968	0.414079	0.295791	0.329108	0.262813	0.209787	0.262604
A03.556.875.Upper.Gastrointestinal.Tract	Digestive	0.677016	0.577006	0.247265	0.136246	0.371717	0.182678	0.252777	0.213034	0.285903	0.212772	0.696003	0.275946	0.0990232	0.48579	0.201622	0.0347176	0.654034	0.525592	0.478952	0.762772	0.517847	0.240419	0.167282	0.79738	0.530304	0.280026	0.544531	0.76735	0.728628	0.351135	0.464598	0.730528	0.74195	0.472646	0.507616	0.471413	0.248513	0.249305	0.2055	0.607338	0.0491771	0.268498	0.56717	0.442677	0.582269	0.358915	0.230121	0.320022
A03.556.Gastrointestinal.Tract	Digestive	0.739906	0.814822	0.161907	0.397944	0.199214	0.45894	0.281126	0.127267	0.106731	0.236765	0.532762	0.644322	0.894207	0.0878328	0.898459	0.949818	0.99904	0.965527	0.988321	0.997108	0.238711	0.285932	0.156697	0.451298	0.994028	0.414834	0.888308	0.748276	0.999999	0.944476	0.862378	0.980045	0.251686	0.501041	0.972828	0.919114	0.237661	0.314135	0.487272	0.795697	0.27548	0.566128	0.833782	0.58415	0.628824	0.170972	0.12364	0.273413
Colon_Sigmoid	Digestive	0.774824	0.319719	0.332737	0.87349	0.104214	0.287685	0.245483	0.345129	0.288556	0.20314	0.544829	0.364569	0.855616	0.841022	0.775567	0.916314	0.514916	0.271041	0.257064	0.370832	0.460468	0.403544	0.259864	0.675082	0.430071	0.142671	0.133646	0.0402559	0.566256	0.245262	0.384346	0.727313	0.463043	0.269455	0.963927	0.973656	0.146917	0.246646	0.22251	0.42456	0.0792891	0.211748	0.163433	0.237641	0.942895	0.216071	0.144517	0.409106
Colon_Transverse	Digestive	0.666018	0.922849	0.105227	0.163223	0.508156	0.878898	0.343908	0.056478	0.138608	0.645502	0.251817	0.422336	0.260247	0.419776	0.581265	0.568514	0.931551	0.837353	0.769135	0.92218	0.853721	0.87081	0.722655	0.808001	0.870788	0.635992	0.667338	0.805749	0.908415	0.697581	0.71396	0.907601	0.195185	0.729804	0.82245	0.621893	0.666473	0.57513	0.52684	0.619562	0.480097	0.587984	0.702023	0.721804	0.896137	0.611006	0.779333	0.890195
Esophagus_Gastroesophageal_Junction	Digestive	0.902283	0.588165	0.944966	0.953118	0.769035	0.627061	0.809555	0.832484	0.934429	0.649639	0.966409	0.366407	0.781962	0.863281	0.523866	0.751705	0.226288	0.11104	0.044789	0.161264	0.906443	0.759034	0.604943	0.667159	0.052102	0.292479	0.0802062	0.174298	0.186721	0.0131206	0.21637	0.503076	0.711288	0.792402	0.433977	0.617014	0.730669	0.639137	0.52922	0.386997	0.610508	0.614618	0.428584	0.330314	0.978703	0.6102	0.87422	0.98701
Esophagus_Mucosa	Digestive	0.215039	0.724621	0.566644	0.0962849	0.70777	0.566755	0.371136	0.650653	0.616476	0.446339	0.45502	0.466897	0.0976674	0.381188	0.211411	0.158813	0.805482	0.865971	0.83435	0.900261	0.630129	0.675297	0.38461	0.522721	0.71057	0.606366	0.441758	0.367387	0.785092	0.899195	0.904162	0.873212	0.773861	0.297384	0.519633	0.625428	0.719798	0.235142	0.0764256	0.275453	0.470587	0.135376	0.0625304	0.108999	0.837956	0.473439	0.322734	0.576921
Esophagus_Muscularis	Digestive	0.906592	0.597185	0.891143	0.956057	0.71595	0.587322	0.667322	0.654519	0.892358	0.499558	0.881221	0.281517	0.641714	0.853313	0.533137	0.634632	0.276795	0.221867	0.0909768	0.317111	0.76926	0.680107	0.561757	0.488104	0.0806539	0.317473	0.105348	0.127377	0.186906	0.0456336	0.225252	0.544877	0.717397	0.418564	0.564847	0.701902	0.451888	0.428821	0.40984	0.219259	0.401629	0.397362	0.27789	0.150495	0.91866	0.573657	0.674277	0.830962
Small_Intestine_Terminal_Ileum	Digestive	0.764951	0.94102	0.58468	0.368924	0.686387	0.548362	0.677101	0.541644	0.743414	0.754253	0.948078	0.750722	0.652134	0.920332	0.958118	0.563135	0.884586	0.92243	0.838453	0.746928	0.677877	0.461583	0.465713	0.198521	0.70774	0.415371	0.451314	0.51413	0.546696	0.423914	0.363908	0.402146	0.586677	0.599778	0.855724	0.509875	0.754911	0.381778	0.583132	0.609914	0.970177	0.614392	0.947874	0.577638	0.549595	0.447716	0.35224	0.519597
Stomach	Digestive	0.997953	0.982829	0.966245	0.985066	0.925299	0.646938	0.634507	0.636959	0.959451	0.441541	0.642286	0.268519	0.954047	0.836687	0.911843	0.817259	0.868798	0.739807	0.660579	0.893722	0.940717	0.701765	0.669772	0.902358	0.904455	0.539642	0.786796	0.520183	0.963737	0.574083	0.634373	0.915933	0.808217	0.183479	0.140461	0.308325	0.322422	0.281379	0.338472	0.11948	0.195256	0.304496	0.785874	0.411938	0.995277	0.854916	0.741906	0.934556
A06.407.071.140.Adrenal.Cortex	Endocrine	0.622916	0.408556	0.397553	0.642603	0.324125	0.422334	0.635548	0.546946	0.209958	0.394693	0.941809	0.259067	0.710959	0.874831	0.444714	0.612785	0.890409	0.65686	0.724786	0.976563	0.331661	0.481333	0.425756	0.111052	0.41743	0.409856	0.467473	0.492758	0.977966	0.73907	0.837963	0.94663	0.444925	0.417351	0.838887	0.783014	0.444229	0.623787	0.676814	0.772543	0.249138	0.553782	0.803866	0.536899	0.973746	0.762374	0.64745	0.833778
A06.407.071.Adrenal.Glands	Endocrine	0.377435	0.222573	0.235366	0.607629	0.262764	0.698331	0.842111	0.434019	0.113535	0.687113	0.985092	0.625892	0.598966	0.966662	0.423833	0.589187	0.601191	0.706038	0.508018	0.929065	0.416793	0.699324	0.600165	0.0912366	0.333509	0.504653	0.411269	0.457798	0.865599	0.640088	0.74619	0.943122	0.488671	0.691581	0.966192	0.953923	0.729762	0.839989	0.906305	0.917784	0.743108	0.82072	0.96979	0.540729	0.984818	0.536013	0.521617	0.790621
A06.407.312.782.Testis	Endocrine	0.689914	0.457345	0.21731	0.705831	0.423376	0.540765	0.291403	0.356035	0.180688	0.232368	0.425935	0.0123563	0.224693	0.87184	0.102997	0.0628041	0.590046	0.691535	0.586895	0.453067	0.533539	0.797376	0.663932	0.6775	0.331337	0.62076	0.330545	0.319487	0.393537	0.533564	0.445363	0.250988	0.527557	0.651869	0.528994	0.383761	0.597815	0.523037	0.336184	0.602224	0.600567	0.561017	0.480326	0.382212	0.823614	0.797467	0.774446	0.797125
A06.407.312.Gonads	Endocrine	0.723362	0.757599	0.919028	0.610534	0.626193	0.81062	0.85617	0.505053	0.884557	0.814478	0.952874	0.533985	0.84777	0.548861	0.757906	0.658429	0.968561	0.988422	0.977996	0.939522	0.864494	0.841962	0.895253	0.911527	0.999475	0.934237	0.984627	0.759195	0.995518	0.993124	0.965969	0.937953	0.710346	0.779049	0.932223	0.985037	0.731033	0.712404	0.750253	0.822045	0.883338	0.885885	0.928908	0.830162	0.98271	0.93934	0.767482	0.975045
A06.407.900.Thyroid.Gland	Endocrine	0.719417	0.915811	0.648036	0.142932	0.558423	0.219256	0.262134	0.523838	0.562714	0.179736	0.813376	0.0157392	0.280852	0.637146	0.244463	0.0825346	0.959096	0.936917	0.949974	0.809043	0.692106	0.313317	0.374154	0.83844	0.926627	0.231593	0.621792	0.305223	0.862296	0.784059	0.794088	0.383074	0.53482	0.153701	0.806875	0.814225	0.139006	0.0131597	0.031128	0.152522	0.497077	0.020165	0.607992	0.0358161	0.750812	0.516887	0.785178	0.825627
A06.407.Endocrine.Glands	Endocrine	0.578961	0.781914	0.923402	0.559152	0.64135	0.884707	0.924673	0.602787	0.845086	0.888835	0.93821	0.474399	0.774845	0.624248	0.804985	0.784736	0.964436	0.987742	0.971839	0.884271	0.906796	0.881689	0.90013	0.890606	0.997987	0.93108	0.949139	0.684372	0.995838	0.951969	0.943318	0.913549	0.656738	0.85517	0.946492	0.985353	0.839885	0.858349	0.867345	0.875601	0.830441	0.924605	0.939471	0.835308	0.995829	0.919484	0.749167	0.996509
A10.336.707.Prostate	Endocrine	0.241547	0.194353	0.372457	0.129341	0.696231	0.622874	0.802866	0.72421	0.488309	0.403995	0.592019	0.267701	0.115904	0.504549	0.311777	0.36576	0.211809	0.38832	0.222804	0.570357	0.555011	0.732342	0.778203	0.579432	0.312078	0.598674	0.664754	0.904409	0.248637	0.404555	0.824288	0.961349	0.915831	0.889329	0.888573	0.66767	0.722304	0.311323	0.192002	0.302996	0.2111	0.179248	0.235982	0.174139	0.880009	0.978113	0.965958	0.976042
A11.382.Endocrine.Cells	Endocrine	0.170662	0.60757	0.550305	0.158839	0.682517	0.216324	0.26579	0.772667	0.620078	0.341708	0.342397	0.584383	0.292372	0.0039139	0.134177	0.433272	0.420692	0.275704	0.428356	0.562718	0.361993	0.0687009	0.0638931	0.128153	0.257504	0.0802533	0.0946099	0.29425	0.542607	0.690084	0.789026	0.627303	0.205082	0.339799	0.468807	0.194688	0.396814	0.230565	0.227099	0.296194	0.309125	0.233463	0.145598	0.351781	0.261906	0.201864	0.430439	0.17689
A11.436.329.Granulosa.Cells	Endocrine	0.767009	0.922388	0.721683	0.543348	0.48201	0.440595	0.396816	0.305671	0.511797	0.343343	0.496079	0.235419	0.813184	0.0401125	0.544721	0.746408	0.732664	0.362992	0.492155	0.628413	0.395691	0.144154	0.135063	0.113702	0.391917	0.109589	0.174135	0.139261	0.730551	0.549774	0.632697	0.89453	0.0516256	0.179418	0.153991	0.0870261	0.238158	0.225311	0.254158	0.199402	0.400485	0.199929	0.144205	0.198209	0.709296	0.285438	0.689405	0.538999
Adrenal_Gland	Endocrine	0.924495	0.456101	0.606922	0.893379	0.484544	0.519972	0.922341	0.590852	0.5997	0.789545	0.993584	0.258027	0.954942	0.77609	0.595821	0.973123	0.791958	0.35767	0.484619	0.993651	0.52702	0.516988	0.672018	0.518584	0.654776	0.802132	0.841681	0.835239	0.996749	0.660755	0.777494	0.981658	0.232641	0.645414	0.728454	0.409606	0.603711	0.839081	0.950442	0.685342	0.593062	0.721474	0.831442	0.725518	0.901141	0.581469	0.473957	0.724619
Pituitary	Endocrine	0.957365	0.972861	0.917069	0.577783	0.896389	0.693036	0.509532	0.794349	0.801973	0.471514	0.720281	0.414675	0.702164	0.578055	0.301279	0.494942	0.47049	0.62187	0.471041	0.387138	0.329074	0.532064	0.380132	0.0307644	0.390534	0.606651	0.598863	0.618746	0.29425	0.32018	0.650995	0.271956	0.762848	0.479402	0.625411	0.660061	0.369717	0.459121	0.3822	0.469142	0.358356	0.175089	0.210672	0.633174	0.486092	0.301442	0.147093	0.150022
Testis	Endocrine	0.580023	0.785687	0.667764	0.755737	0.562864	0.815734	0.3733	0.17909	0.463754	0.505089	0.329042	0.152901	0.609117	0.214998	0.139586	0.344101	0.582727	0.314854	0.223387	0.15282	0.64424	0.787112	0.624817	0.798611	0.413182	0.698406	0.412176	0.283734	0.303431	0.29714	0.0681672	0.0200434	0.02708	0.232446	0.0147388	0.0733648	0.319125	0.710223	0.656423	0.387147	0.367546	0.569625	0.796944	0.872772	0.0469052	0.188788	0.0782181	0.110231
Thyroid	Endocrine	0.131502	0.501948	0.298528	0.0453819	0.620981	0.652625	0.309392	0.684789	0.434814	0.195973	0.759003	0.0539346	0.0477167	0.0934239	0.0302709	0.0405448	0.138971	0.44911	0.107857	0.0473202	0.523852	0.596099	0.249679	0.446524	0.413129	0.486774	0.392841	0.454268	0.113184	0.4071	0.371577	0.0606372	0.419483	0.078861	0.614078	0.834884	0.128585	0.0590751	0.0082014	0.0175268	0.581333	0.0151123	0.265726	0.0230917	0.377266	0.31086	0.153298	0.398777
A03.620.Liver	Liver	0.558574	0.774401	0.667728	0.400908	0.638539	0.357294	0.378684	0.623577	0.561265	0.495282	0.732133	0.571077	0.683954	0.459752	0.443517	0.375983	0.925992	0.654817	0.833615	0.818136	0.666494	0.179005	0.138769	0.43496	0.667876	0.160307	0.562511	0.60894	0.86239	0.391164	0.340858	0.663792	0.502317	0.230274	0.774525	0.410029	0.441166	0.255444	0.433669	0.544247	0.52815	0.427284	0.558731	0.527965	0.868084	0.596458	0.672449	0.80423
A11.436.348.Hepatocytes	Liver	0.728751	0.328609	0.423439	0.784523	0.367951	0.115901	0.23621	0.722188	0.688464	0.423205	0.895897	0.82413	0.503198	0.750126	0.490755	0.584837	0.854235	0.505615	0.774221	0.987722	0.116595	0.0457734	0.0821924	0.303306	0.456957	0.175578	0.816023	0.928499	0.872993	0.737837	0.88788	0.903902	0.824804	0.383962	0.858738	0.186525	0.387452	0.172101	0.416323	0.692059	0.706405	0.432702	0.853823	0.586325	0.297634	0.159272	0.0644289	0.0121177
Liver	Liver	0.560364	0.687641	0.289414	0.132743	0.823387	0.499711	0.367899	0.446575	0.336565	0.618507	0.820659	0.636576	0.379104	0.734927	0.739563	0.270186	0.690492	0.434029	0.664988	0.673854	0.769854	0.188971	0.114652	0.0707567	0.351847	0.224831	0.349883	0.941143	0.483407	0.189653	0.673441	0.825365	0.411812	0.522459	0.321728	0.185315	0.77721	0.406707	0.332801	0.47368	0.946524	0.653749	0.694271	0.559249	0.876212	0.493996	0.953951	0.912196
A02.165.Cartilage	Musculoskeletal/Connective	0.535265	0.450897	0.911673	0.591343	0.4812	0.416351	0.837832	0.811448	0.987564	0.976461	0.974101	0.788933	0.717709	0.240217	0.585938	0.629085	0.732409	0.120458	0.462747	0.818613	0.332615	0.24958	0.349633	0.311141	0.418426	0.305488	0.168044	0.101187	0.769972	0.171261	0.376763	0.766447	0.68334	0.994135	0.908078	0.240493	0.993206	0.96646	0.98161	0.986712	0.995283	0.991787	0.857972	0.806946	0.561827	0.26945	0.272056	0.543995
A02.633.567.850.Quadriceps.Muscle	Musculoskeletal/Connective	0.258455	0.0656043	0.235195	0.14892	0.365634	0.314494	0.951808	0.722569	0.663609	0.823656	0.98653	0.532105	0.257067	0.878108	0.19924	0.256262	0.0326348	0.0434481	0.021959	0.13507	0.389464	0.376045	0.678684	0.360259	0.04869	0.479607	0.512833	0.574203	0.103434	0.158603	0.0934364	0.283778	0.199887	0.373856	0.631262	0.319888	0.426452	0.561657	0.872124	0.715773	0.482842	0.60887	0.44082	0.662726	0.488159	0.294697	0.414851	0.604078
A02.835.232.834.151.Cervical.Vertebrae	Musculoskeletal/Connective	0.165179	0.0423771	0.0659556	0.262048	0.281588	0.755569	0.425831	0.746944	0.0848331	0.790657	0.201714	0.441784	0.129916	0.141969	0.416192	0.543552	0.0235419	0.0777108	0.0856986	0.392188	0.246675	0.801163	0.710707	0.361998	0.128617	0.794186	0.606066	0.581737	0.0690622	0.394784	0.577448	0.824509	0.839639	0.925697	0.708308	0.505233	0.867877	0.936675	0.874512	0.823952	0.47923	0.74696	0.198917	0.713725	0.35339	0.0767818	0.361299	0.42402
A02.835.583.443.800.Synovial.Membrane	Musculoskeletal/Connective	0.238064	0.0625262	0.167202	0.377004	0.017867	0.0893152	0.0697654	0.334167	0.263463	0.399172	0.450095	0.651891	0.434239	0.626964	0.632235	0.867538	0.0657213	0.0996914	0.0713469	0.0991172	0.0253375	0.132216	0.0786092	0.252544	0.103458	0.226935	0.0672643	0.0575214	0.0660417	0.148965	0.0344861	0.1672	0.660312	0.68254	0.642396	0.438229	0.584451	0.61136	0.389783	0.614279	0.775498	0.671645	0.382531	0.537689	0.600237	0.794064	0.534113	0.746503
A05.360.319.679.690.Myometrium	Musculoskeletal/Connective	0.117115	0.114495	0.267258	0.22235	0.468349	0.808514	0.816818	0.856267	0.521424	0.809969	0.958395	0.373164	0.38621	0.761311	0.75763	0.681109	0.154339	0.22548	0.229632	0.318484	0.732132	0.863206	0.832606	0.783857	0.3626	0.782539	0.557304	0.550204	0.372415	0.502937	0.752701	0.793943	0.747972	0.989692	0.828608	0.610772	0.975658	0.909324	0.873219	0.931095	0.951086	0.926502	0.762682	0.503947	0.953312	0.983741	0.900946	0.895294
A10.165.450.300.425.Keloid	Musculoskeletal/Connective	0.188763	0.570062	0.677802	0.7485	0.846999	0.956505	0.756092	0.90072	0.821708	0.882145	0.77698	0.598195	0.525467	0.370106	0.296285	0.746348	0.60883	0.756399	0.570029	0.678878	0.763892	0.839328	0.504718	0.616658	0.563261	0.847017	0.68526	0.732529	0.35364	0.628379	0.353491	0.411092	0.173966	0.513912	0.0851214	0.134812	0.802764	0.906852	0.532229	0.591767	0.580515	0.540716	0.1019	0.50785	0.0203818	0.331113	0.477701	0.193529
A10.165.450.300.Cicatrix	Musculoskeletal/Connective	0.234863	0.461103	0.658419	0.631891	0.551979	0.739355	0.304173	0.621766	0.69524	0.534346	0.564815	0.528037	0.55352	0.354395	0.211113	0.700981	0.464134	0.60617	0.367365	0.466601	0.461706	0.484243	0.160787	0.212279	0.359403	0.559772	0.365911	0.61569	0.257557	0.442012	0.246485	0.430382	0.0986675	0.208968	0.0901427	0.143919	0.419159	0.694772	0.269813	0.221024	0.207207	0.20241	0.0424391	0.295267	0.0414375	0.191795	0.570549	0.241054
A10.690.467.Muscle..Smooth	Musculoskeletal/Connective	0.250828	0.136565	0.566628	0.73903	0.216632	0.687199	0.503389	0.420519	0.541963	0.766759	0.682661	0.849352	0.742833	0.543651	0.955039	0.990405	0.423482	0.691906	0.414218	0.715496	0.425616	0.792603	0.75667	0.376065	0.678147	0.927799	0.796318	0.932632	0.5623	0.572657	0.624355	0.894563	0.494954	0.961444	0.82325	0.917478	0.942437	0.975636	0.837492	0.84361	0.886494	0.896095	0.0978717	0.764816	0.490759	0.38244	0.700754	0.45115
A10.690.Muscles	Musculoskeletal/Connective	0.298606	0.197127	0.412609	0.135991	0.52077	0.234868	0.896226	0.715775	0.722002	0.731822	0.978585	0.192221	0.278125	0.935088	0.277333	0.312581	0.104831	0.334828	0.230466	0.260279	0.589252	0.311794	0.548058	0.318442	0.282878	0.408504	0.451626	0.462623	0.161807	0.355429	0.287244	0.409619	0.358374	0.472276	0.625435	0.323334	0.481011	0.412712	0.655567	0.581983	0.520681	0.465329	0.132446	0.394634	0.557144	0.242403	0.50349	0.716411
A11.329.171.Chondrocytes	Musculoskeletal/Connective	0.721492	0.421769	0.945313	0.857677	0.419053	0.180052	0.363968	0.816961	0.97977	0.429054	0.975023	0.0708657	0.897557	0.616443	0.801857	0.941111	0.488492	0.208718	0.4917	0.802333	0.166526	0.0998708	0.150126	0.345503	0.585519	0.0989095	0.346049	0.0273105	0.788093	0.395618	0.775176	0.845982	0.900988	0.31233	0.0962442	0.294822	0.588623	0.193766	0.0993404	0.211079	0.938425	0.155045	0.151219	0.0852169	0.6332	0.37998	0.354598	0.912166
A11.329.228.Fibroblasts	Musculoskeletal/Connective	0.00883036	0.00526099	0.102267	0.115516	0.00442418	0.134274	0.124215	0.122934	0.136946	0.266912	0.12887	0.233537	0.182379	0.287437	0.468263	0.80621	0.0865555	0.102857	0.0945396	0.164471	0.0647131	0.537614	0.370848	0.438894	0.117432	0.693738	0.250919	0.266243	0.111671	0.121213	0.169503	0.471208	0.369095	0.643196	0.680264	0.752623	0.357066	0.835768	0.495105	0.575004	0.458567	0.585956	0.0291836	0.432445	0.486164	0.507364	0.280539	0.854066
A11.329.629.Osteoblasts	Musculoskeletal/Connective	0.230567	0.1905	0.593555	0.830467	0.095827	0.694099	0.546559	0.409299	0.45613	0.531289	0.245628	0.812257	0.797901	0.521424	0.885432	0.929722	0.517602	0.470013	0.658445	0.727439	0.360579	0.843208	0.805794	0.909621	0.73639	0.764883	0.722108	0.622141	0.634911	0.444975	0.302447	0.739174	0.48749	0.845972	0.794697	0.819775	0.374116	0.838323	0.595185	0.63737	0.73461	0.78684	0.184106	0.545829	0.307877	0.249894	0.0778168	0.473976
A11.329.830.Stromal.Cells	Musculoskeletal/Connective	0.0167798	0.0298143	0.131516	0.097882	0.0178476	0.138215	0.161008	0.165229	0.236349	0.220776	0.581997	0.880077	0.0990902	0.231905	0.445524	0.622827	0.10058	0.144904	0.109471	0.337693	0.0530777	0.150884	0.173057	0.118829	0.0717525	0.330484	0.211739	0.715372	0.135851	0.254888	0.29264	0.645878	0.246031	0.572061	0.823381	0.706463	0.345726	0.565754	0.382042	0.676383	0.768233	0.59143	0.21407	0.620493	0.207951	0.249366	0.303532	0.571508
A11.329.Connective.Tissue.Cells	Musculoskeletal/Connective	0.299155	0.366673	0.599423	0.255718	0.186799	0.0784593	0.133881	0.0932618	0.320806	0.035046	0.0207019	0.0724786	0.433159	0.0504719	0.730342	0.820667	0.564105	0.196086	0.252207	0.329474	0.36514	0.171318	0.113184	0.363579	0.261808	0.0630718	0.0300483	0.0795027	0.454787	0.425424	0.168109	0.30181	0.31522	0.0651042	0.399296	0.293194	0.0145909	0.0322202	0.0187036	0.0681552	0.0133224	0.0249232	0.0258084	0.193378	0.279654	0.540628	0.576244	0.40484
A11.620.520.Myocytes..Smooth.Muscle	Musculoskeletal/Connective	0.516928	0.69009	0.88663	0.858196	0.875422	0.92918	0.922454	0.720638	0.950891	0.97413	0.869347	0.953725	0.807838	0.222215	0.740044	0.966998	0.366006	0.578129	0.267434	0.58615	0.867891	0.903408	0.937303	0.719888	0.67802	0.961069	0.905	0.986842	0.350912	0.207306	0.16186	0.738065	0.721216	0.966785	0.772234	0.787538	0.959024	0.95067	0.838322	0.810774	0.740534	0.817669	0.109405	0.597228	0.202891	0.0728705	0.38534	0.13875
Muscle_Skeletal	Musculoskeletal/Connective	0.778654	0.0806459	0.0816708	0.263783	0.231737	0.0153887	0.208543	0.51409	0.187278	0.132194	0.797184	0.266307	0.655728	0.935534	0.715263	0.515564	0.267188	0.0309516	0.0808751	0.669154	0.0281989	0.00382478	0.00546407	0.00406899	0.0253325	0.0141143	0.0811635	0.196356	0.439659	0.232891	0.746314	0.942501	0.41057	0.113268	0.848753	0.554954	0.140684	0.0283054	0.179301	0.169133	0.231789	0.0571467	0.115585	0.0601554	0.758771	0.414084	0.442036	0.803673
A03.734.414.Islets.of.Langerhans	Other	0.250571	0.427802	0.292739	0.145085	0.297327	0.13084	0.147087	0.35431	0.41614	0.106237	0.204067	0.116848	0.4843	0.125841	0.382002	0.695784	0.579527	0.411194	0.448155	0.349023	0.308088	0.17103	0.152662	0.533156	0.394887	0.191605	0.198595	0.339926	0.6048	0.583693	0.619239	0.581919	0.295361	0.0839628	0.732546	0.825783	0.100959	0.142696	0.10924	0.166888	0.253462	0.212829	0.373093	0.343549	0.927924	0.912817	0.80085	0.946169
A03.734.Pancreas	Other	0.289794	0.76169	0.950358	0.367582	0.492886	0.293236	0.493071	0.476091	0.946962	0.644153	0.596611	0.377503	0.499784	0.155207	0.595938	0.665264	0.69254	0.745951	0.7335	0.322571	0.643999	0.249611	0.33538	0.466828	0.914525	0.418847	0.660052	0.337576	0.623228	0.248444	0.0349447	0.120632	0.46928	0.383379	0.470997	0.658814	0.36522	0.211747	0.277453	0.193789	0.100154	0.225007	0.200378	0.172778	0.784258	0.242893	0.34051	0.680177
A04.411.Lung	Other	0.406421	0.176252	0.179755	0.796576	0.0783667	0.526021	0.337757	0.269293	0.195819	0.379084	0.3249	0.216012	0.766299	0.834813	0.920366	0.877481	0.37152	0.739887	0.525036	0.41193	0.333698	0.820574	0.891883	0.897509	0.731669	0.893507	0.853774	0.96461	0.243611	0.213872	0.28034	0.153263	0.480142	0.453735	0.346492	0.689382	0.279394	0.571388	0.487624	0.409143	0.180745	0.577461	0.525156	0.319345	0.543632	0.392439	0.186348	0.579866
A04.531.520.Nasal.Mucosa	Other	0.871127	0.752137	0.392	0.487459	0.880777	0.459056	0.564474	0.861808	0.729046	0.69429	0.778354	0.763036	0.334671	0.706195	0.340079	0.271312	0.478748	0.676583	0.6182	0.823211	0.557731	0.539224	0.385345	0.403351	0.418409	0.462671	0.648072	0.456795	0.484651	0.508512	0.816448	0.819107	0.935764	0.668146	0.804081	0.809919	0.586684	0.221711	0.443721	0.723204	0.656603	0.350702	0.273392	0.532966	0.922737	0.114234	0.310027	0.831966
A05.360.319.114.373.Fallopian.Tubes	Other	0.615115	0.740274	0.839479	0.592504	0.537014	0.775546	0.623968	0.456409	0.865778	0.766798	0.746337	0.760515	0.652174	0.434084	0.434251	0.542855	0.919385	0.992117	0.952699	0.735277	0.604872	0.867604	0.904606	0.894144	0.998736	0.963844	0.994088	0.925479	0.966138	0.97515	0.864776	0.720053	0.92086	0.721537	0.968491	0.990732	0.617682	0.762169	0.698905	0.744146	0.636975	0.747383	0.776795	0.774238	0.941496	0.674007	0.519709	0.940037
A05.360.319.114.630.Ovary	Other	0.521896	0.616378	0.827882	0.444451	0.519687	0.781872	0.847195	0.60164	0.8517	0.855582	0.974869	0.505664	0.618548	0.392694	0.616292	0.613566	0.967015	0.988487	0.987754	0.969998	0.726454	0.841144	0.893503	0.936154	0.998607	0.964816	0.99377	0.892451	0.99466	0.997552	0.990692	0.959514	0.759432	0.857486	0.970142	0.992786	0.722879	0.784383	0.835475	0.896715	0.922199	0.925533	0.935613	0.887503	0.946026	0.829006	0.574506	0.890548
A05.360.319.679.256.Cervix.Uteri	Other	0.74411	0.153381	0.325563	0.498891	0.506103	0.36573	0.820293	0.779125	0.451063	0.855601	0.890768	0.479543	0.595502	0.563532	0.541306	0.4204	0.714955	0.656798	0.825915	0.985273	0.524865	0.56453	0.769804	0.795193	0.875246	0.855821	0.92905	0.958257	0.987665	0.833597	0.977999	0.987295	0.679522	0.919972	0.90552	0.768411	0.833258	0.821996	0.905264	0.928058	0.864283	0.920933	0.827047	0.793835	0.905532	0.184991	0.23328	0.428145
A05.360.319.679.490.Endometrium	Other	0.606084	0.59996	0.607819	0.289873	0.474138	0.617637	0.706824	0.408036	0.458646	0.665551	0.970511	0.466993	0.648459	0.680685	0.544307	0.639494	0.684408	0.677753	0.581164	0.833822	0.510713	0.701019	0.693377	0.849634	0.653653	0.726851	0.528771	0.393835	0.886252	0.845361	0.770315	0.927778	0.752011	0.923779	0.982779	0.990136	0.794763	0.912236	0.888813	0.928569	0.713947	0.937381	0.917479	0.971834	0.97718	0.661985	0.520657	0.765979
A05.360.319.679.Uterus	Other	0.431893	0.103586	0.277158	0.228781	0.0675904	0.139415	0.225614	0.0932896	0.163798	0.155548	0.946944	0.144353	0.504817	0.416619	0.28865	0.386743	0.371331	0.171821	0.264664	0.668373	0.161254	0.293813	0.264121	0.551639	0.419651	0.244143	0.223522	0.0725716	0.838041	0.521729	0.490439	0.790124	0.535705	0.609217	0.925659	0.93984	0.217826	0.348559	0.480413	0.601983	0.663405	0.636168	0.802627	0.471883	0.915574	0.429327	0.273916	0.321851
A05.360.319.887.Vulva	Other	0.138346	0.489847	0.356632	0.136013	0.249334	0.636409	0.848464	0.414966	0.508855	0.703882	0.911408	0.93699	0.193661	0.178086	0.137367	0.152411	0.819493	0.897744	0.800457	0.882567	0.687118	0.829832	0.785241	0.689583	0.817749	0.752602	0.431184	0.717639	0.695362	0.511142	0.598749	0.683509	0.662044	0.703586	0.91994	0.960422	0.680857	0.646861	0.713746	0.90784	0.717856	0.711836	0.952694	0.606742	0.949005	0.638551	0.484732	0.806699
A05.360.319.Genitalia..Female	Other	0.715169	0.666748	0.731417	0.447378	0.490061	0.660046	0.731199	0.298294	0.64621	0.740924	0.929374	0.544858	0.828334	0.428138	0.77273	0.820193	0.907127	0.758565	0.836753	0.93359	0.632957	0.640069	0.701485	0.899185	0.991359	0.826212	0.89394	0.69697	0.987532	0.842713	0.804129	0.918375	0.560577	0.769193	0.982892	0.99044	0.658839	0.634114	0.684606	0.824622	0.856259	0.778902	0.901094	0.74547	0.961656	0.502895	0.487526	0.777656
A05.360.444.492.362.Foreskin	Other	0.800146	0.876497	0.958166	0.45633	0.817249	0.836625	0.774116	0.774581	0.891464	0.468439	0.795335	0.320097	0.537412	0.640076	0.711234	0.44267	0.74608	0.485053	0.364382	0.120195	0.749291	0.906892	0.721663	0.484173	0.613704	0.718072	0.363602	0.31125	0.575028	0.165781	0.352423	0.205323	0.444673	0.271873	0.314196	0.643087	0.435206	0.796924	0.403781	0.26388	0.194387	0.516149	0.156675	0.768293	0.742008	0.683167	0.690088	0.925684
A05.360.444.Genitalia..Male	Other	0.479004	0.196895	0.458447	0.222164	0.488047	0.663914	0.833452	0.521292	0.321866	0.477206	0.628896	0.45259	0.305894	0.708637	0.711854	0.334676	0.406778	0.605544	0.415123	0.567011	0.44786	0.828146	0.861159	0.463026	0.379906	0.832255	0.814793	0.982526	0.480848	0.540816	0.890509	0.971849	0.600429	0.797145	0.647142	0.615874	0.666718	0.558393	0.424635	0.432731	0.184965	0.430775	0.253331	0.526544	0.937376	0.975949	0.965345	0.987183
A05.360.490.Germ.Cells	Other	0.26578	0.19191	0.408716	0.50922	0.707155	0.283936	0.349051	0.755764	0.646341	0.234597	0.571165	0.189185	0.147896	0.435368	0.131507	0.59206	0.0406653	0.0232814	0.102537	0.151216	0.341912	0.283852	0.2915	0.272193	0.0382368	0.0541073	0.0261573	0.023451	0.0900734	0.0674158	0.382318	0.661845	0.621883	0.400274	0.480762	0.551084	0.321479	0.226858	0.0862781	0.0861372	0.0710187	0.0512032	0.0343445	0.0908225	0.838673	0.27823	0.393649	0.436588
A05.360.Genitalia	Other	0.709323	0.807045	0.810598	0.556222	0.502685	0.5665	0.378358	0.434463	0.718072	0.357385	0.763155	0.30747	0.799561	0.41418	0.744544	0.660238	0.966331	0.959108	0.844363	0.852217	0.540917	0.605193	0.567013	0.567254	0.968092	0.706299	0.793849	0.886701	0.967105	0.877373	0.943154	0.888042	0.651267	0.683345	0.900114	0.975474	0.510862	0.453907	0.289757	0.512682	0.536311	0.505928	0.82185	0.561666	0.982398	0.93875	0.91877	0.884261
A05.810.453.324.Kidney.Cortex	Other	0.562562	0.248585	0.715394	0.599623	0.315408	0.450202	0.623582	0.800447	0.691797	0.64472	0.819644	0.628738	0.640276	0.61444	0.752877	0.814822	0.226294	0.0953046	0.123023	0.661919	0.242926	0.448469	0.397816	0.320828	0.339279	0.52663	0.328806	0.608199	0.47249	0.0371509	0.506192	0.676756	0.182612	0.398179	0.190911	0.19796	0.575632	0.70881	0.432817	0.621339	0.464357	0.498592	0.359229	0.429241	0.745831	0.573697	0.773604	0.583046
A05.810.453.Kidney	Other	0.707586	0.26736	0.333855	0.836397	0.112112	0.426614	0.221522	0.134111	0.16452	0.332094	0.892824	0.177536	0.857234	0.96563	0.8699	0.93601	0.428846	0.14279	0.195199	0.731919	0.0751985	0.332287	0.152881	0.0820709	0.22145	0.350651	0.286496	0.23866	0.878986	0.166855	0.276378	0.877324	0.332605	0.204281	0.244673	0.542925	0.374366	0.84961	0.701253	0.420811	0.517104	0.696573	0.390336	0.730868	0.994879	0.275152	0.843221	0.941736
A05.810.890.Urinary.Bladder	Other	0.125504	0.353593	0.451968	0.0638292	0.501878	0.360098	0.795637	0.605796	0.442702	0.703264	0.959891	0.22241	0.290522	0.224471	0.708672	0.414409	0.749077	0.565322	0.677057	0.840442	0.66849	0.261077	0.159829	0.702029	0.710195	0.205469	0.382836	0.432423	0.739058	0.620849	0.57998	0.747931	0.0537867	0.812192	0.797024	0.149196	0.650947	0.262013	0.386944	0.935272	0.90596	0.537298	0.906917	0.253195	0.227642	0.156069	0.236583	0.213876
A09.371.Eye	Other	0.452512	0.486669	0.43493	0.17507	0.698699	0.789538	0.894601	0.615213	0.621859	0.842992	0.438553	0.832278	0.281566	0.452848	0.532322	0.317383	0.325326	0.267011	0.412584	0.251375	0.884593	0.78876	0.820384	0.870252	0.681904	0.634703	0.637789	0.435494	0.438785	0.167319	0.465234	0.503477	0.94089	0.969171	0.81329	0.815515	0.935357	0.793403	0.764819	0.724498	0.544401	0.738991	0.470309	0.554444	0.617119	0.288987	0.135255	0.279053
A10.272.497.Epidermis	Other	0.575223	0.631663	0.248583	0.2077	0.822121	0.980614	0.985987	0.531926	0.592923	0.983557	0.976621	0.902401	0.550913	0.743008	0.797533	0.72884	0.59881	0.352645	0.4156	0.740539	0.782436	0.944685	0.892743	0.788789	0.4603	0.734202	0.778375	0.496296	0.714627	0.346155	0.524707	0.776153	0.850695	0.973075	0.894951	0.614976	0.972707	0.944166	0.930019	0.937346	0.892882	0.925219	0.809105	0.710782	0.498809	0.017907	0.00102107	0.0256519
A10.272.Epithelium	Other	0.923804	0.80091	0.666342	0.72102	0.905534	0.730427	0.872637	0.791961	0.749389	0.878703	0.737256	0.580866	0.702877	0.837487	0.679542	0.567131	0.57338	0.691877	0.768927	0.948093	0.703001	0.832106	0.818299	0.764235	0.695636	0.831283	0.959667	0.799554	0.740306	0.578439	0.935952	0.945865	0.936712	0.779352	0.843983	0.898928	0.701346	0.517352	0.625308	0.721486	0.365832	0.607781	0.28997	0.55916	0.982192	0.22921	0.275667	0.855573
A10.615.284.473.Chorion	Other	0.336475	0.0539248	0.280204	0.592843	0.00775211	0.111934	0.0714118	0.0435799	0.227414	0.0740669	0.162207	0.935939	0.689301	0.264432	0.681952	0.814729	0.445349	0.392203	0.375185	0.43047	0.0431635	0.274993	0.280026	0.406424	0.37161	0.543508	0.228295	0.625527	0.351869	0.299578	0.352369	0.301042	0.390204	0.200586	0.414296	0.427056	0.105221	0.454457	0.371241	0.344283	0.412156	0.377958	0.317914	0.811806	0.753876	0.401888	0.466887	0.465621
A10.615.550.599.Mouth.Mucosa	Other	0.383018	0.185946	0.144468	0.122089	0.042918	0.43254	0.219302	0.038689	0.00711853	0.286356	0.524071	0.93518	0.455031	0.461015	0.511126	0.33632	0.433281	0.293002	0.441118	0.846124	0.0103073	0.356362	0.176064	0.0446813	0.152741	0.474708	0.221029	0.608971	0.780411	0.472248	0.805373	0.91007	0.128997	0.14453	0.347449	0.326959	0.178133	0.430354	0.538231	0.409424	0.486684	0.430595	0.541268	0.693665	0.503282	0.0201393	0.0284454	0.101619
A10.615.550.Mucous.Membrane	Other	0.606095	0.444097	0.168633	0.467826	0.160608	0.188303	0.0631375	0.100013	0.155753	0.092311	0.485356	0.441414	0.750404	0.271191	0.704949	0.917952	0.674154	0.6651	0.686816	0.92017	0.0844314	0.215051	0.164348	0.140189	0.69107	0.437818	0.806653	0.83054	0.883368	0.558982	0.893875	0.983499	0.44386	0.139662	0.579927	0.490725	0.0638262	0.0685336	0.15036	0.235112	0.256802	0.171821	0.568705	0.552901	0.850245	0.182709	0.203998	0.588028
A10.615.789.Serous.Membrane	Other	0.0777924	0.0234065	0.208904	0.290389	0.00799653	0.0368638	0.144595	0.130888	0.0465595	0.0573492	0.686757	0.00605711	0.50644	0.0633274	0.564861	0.939168	0.271197	0.267499	0.516127	0.854134	0.0798242	0.164929	0.174139	0.421612	0.67955	0.380843	0.505874	0.355577	0.920751	0.793245	0.852179	0.985996	0.0672512	0.329429	0.657937	0.515424	0.0429712	0.257449	0.474722	0.396175	0.418593	0.521842	0.659088	0.341749	0.886755	0.487427	0.345239	0.801543
A10.615.Membranes	Other	0.757535	0.596947	0.340081	0.470846	0.16673	0.0793715	0.0326643	0.0806716	0.106649	0.0269659	0.335023	0.195548	0.741127	0.66464	0.773536	0.894837	0.719576	0.559998	0.642584	0.869512	0.0922978	0.102368	0.0548414	0.154528	0.595974	0.126469	0.254193	0.549103	0.878986	0.485982	0.785031	0.982927	0.192072	0.106335	0.406719	0.317529	0.0351691	0.018576	0.0290261	0.132276	0.16674	0.100605	0.395402	0.392112	0.882474	0.570843	0.415966	0.878335
A11.436.275.Endothelial.Cells	Other	0.430849	0.295328	0.409703	0.491712	0.465154	0.688282	0.39349	0.335821	0.439519	0.656645	0.404084	0.702233	0.455734	0.4653	0.358077	0.499203	0.82612	0.743456	0.742906	0.740894	0.305833	0.75306	0.685693	0.281229	0.602664	0.781398	0.570436	0.72694	0.887066	0.654306	0.51895	0.877412	0.591601	0.705987	0.4918	0.382485	0.786367	0.870341	0.667552	0.632879	0.473823	0.742664	0.692097	0.83725	0.741705	0.282268	0.369126	0.847034
A11.436.294.064.Glucagon.Secreting.Cells	Other	0.230478	0.442861	0.469348	0.130309	0.359396	0.15496	0.28073	0.553624	0.415168	0.151198	0.34548	0.11831	0.47129	0.287207	0.479018	0.58941	0.718683	0.628774	0.693478	0.567707	0.406698	0.225751	0.182492	0.52123	0.598302	0.224071	0.263287	0.293872	0.867222	0.77607	0.871543	0.848343	0.252437	0.158684	0.794692	0.833679	0.206017	0.195984	0.217434	0.288784	0.388076	0.357425	0.576303	0.508308	0.996849	0.981767	0.85041	0.978763
A11.436.397.Keratinocytes	Other	0.446384	0.176113	0.337392	0.155035	0.517768	0.71147	0.876308	0.62196	0.464578	0.866322	0.853562	0.974272	0.163887	0.648532	0.35704	0.225334	0.127623	0.115293	0.150081	0.279666	0.346114	0.756857	0.728974	0.54371	0.102424	0.668866	0.537814	0.858661	0.262142	0.0612476	0.201627	0.353468	0.837497	0.939876	0.703666	0.357978	0.936009	0.849332	0.826612	0.946814	0.707998	0.893999	0.757582	0.762422	0.871605	0.124429	0.189651	0.434857
A11.436.Epithelial.Cells	Other	0.11075	0.0523527	0.0305962	0.178711	0.342668	0.227882	0.426095	0.834138	0.296725	0.389397	0.89074	0.33254	0.0346287	0.0892359	0.0393647	0.130964	0.161372	0.360272	0.403017	0.765126	0.32575	0.307611	0.234822	0.368773	0.190014	0.478909	0.460015	0.737497	0.317113	0.576058	0.880224	0.912437	0.710995	0.343206	0.603365	0.565697	0.44669	0.272121	0.307357	0.316646	0.506989	0.240734	0.216391	0.391717	0.857104	0.765451	0.797579	0.981899
A11.497.497.600.Oocytes	Other	0.665496	0.197549	0.405287	0.882404	0.682448	0.426092	0.301882	0.682373	0.603337	0.411691	0.58769	0.208762	0.380155	0.652619	0.106793	0.799107	0.0391323	0.0355885	0.0489601	0.155935	0.450671	0.401289	0.382145	0.259647	0.011623	0.10168	0.0095197	0.0383769	0.0826519	0.0139231	0.10505	0.514959	0.347274	0.49889	0.110607	0.090438	0.355558	0.371142	0.180527	0.0703224	0.0826355	0.11992	0.0554448	0.0991231	0.780126	0.0538418	0.132283	0.321052
A11.872.040.Adult.Stem.Cells	Other	0.359658	0.112975	0.22714	0.609721	0.111405	0.380315	0.34097	0.347209	0.373727	0.660482	0.642484	0.183474	0.35454	0.346443	0.152092	0.774336	0.181602	0.541196	0.25632	0.37659	0.289608	0.645199	0.78616	0.592781	0.423818	0.894171	0.752701	0.772633	0.19132	0.531304	0.428023	0.654154	0.118063	0.112626	0.0511686	0.03173	0.158669	0.601947	0.637356	0.173367	0.116971	0.221253	0.249868	0.34034	0.739501	0.55054	0.654169	0.844717
A11.872.190.260.Embryoid.Bodies	Other	0.129301	0.181277	0.497472	0.385464	0.260174	0.365004	0.496782	0.355311	0.758164	0.830435	0.773223	0.955889	0.45387	0.495921	0.793114	0.659707	0.236143	0.0964689	0.214862	0.345613	0.391641	0.168868	0.186417	0.48075	0.271416	0.0956313	0.0279281	0.0984391	0.460474	0.214169	0.109203	0.447623	0.0884568	0.914792	0.415884	0.117611	0.850273	0.640125	0.682312	0.895175	0.426297	0.659656	0.133073	0.217819	0.575132	0.251065	0.155226	0.624937
A11.872.190.Embryonic.Stem.Cells	Other	0.311451	0.264073	0.185114	0.273967	0.555764	0.814232	0.63458	0.888264	0.51517	0.890011	0.842051	0.470792	0.0643417	0.191579	0.00330944	0.129964	0.152065	0.563691	0.29772	0.210218	0.50662	0.857002	0.912387	0.823856	0.621108	0.978531	0.962387	0.868732	0.0666853	0.562905	0.541483	0.337271	0.552442	0.47179	0.128068	0.112568	0.601177	0.810027	0.829785	0.266442	0.292673	0.350179	0.348215	0.350108	0.884848	0.772532	0.780814	0.784179
A11.872.580.Mesenchymal.Stem.Cells	Other	0.0895682	0.0972198	0.898159	0.74332	0.336152	0.434513	0.693991	0.952409	0.94035	0.949328	0.745955	0.922695	0.370589	0.14168	0.54654	0.781482	0.0718772	0.056636	0.106741	0.159486	0.192589	0.48671	0.480962	0.384576	0.17863	0.826196	0.566374	0.678112	0.108274	0.0334523	0.0966749	0.349417	0.731925	0.981862	0.401104	0.255011	0.961814	0.988602	0.933016	0.77552	0.735167	0.973266	0.0914657	0.889297	0.164487	0.148444	0.341425	0.4157
A11.872.700.500.Induced.Pluripotent.Stem.Cells	Other	0.519749	0.183997	0.203933	0.313443	0.421125	0.802321	0.603235	0.369426	0.354206	0.736364	0.679682	0.369431	0.219796	0.290078	0.054352	0.560005	0.0586977	0.522508	0.100287	0.0736244	0.709764	0.927188	0.969995	0.835282	0.374572	0.984091	0.900299	0.918926	0.0142033	0.290892	0.205969	0.175323	0.167069	0.176414	0.0405145	0.0483801	0.363802	0.845033	0.844086	0.213478	0.292663	0.360215	0.236607	0.63942	0.752414	0.640458	0.787646	0.72726
A11.872.Stem.Cells	Other	0.445832	0.111048	0.131871	0.535282	0.396474	0.392871	0.488163	0.832507	0.380354	0.697554	0.485708	0.339077	0.246531	0.387173	0.114934	0.598291	0.135721	0.217919	0.164096	0.47841	0.361776	0.560971	0.586429	0.389327	0.292521	0.714173	0.589879	0.540687	0.310473	0.778013	0.78868	0.886004	0.976772	0.623223	0.59321	0.651714	0.846187	0.869595	0.850318	0.805188	0.70056	0.838856	0.523816	0.947131	0.730079	0.868338	0.668045	0.926002
A14.549.167.646.Periodontium	Other	0.27373	0.434507	0.346769	0.0564951	0.589202	0.861679	0.837611	0.35583	0.258973	0.699344	0.813796	0.51866	0.316278	0.257326	0.27914	0.24249	0.267835	0.44253	0.411086	0.540274	0.390074	0.810493	0.705958	0.264141	0.345669	0.660443	0.266612	0.26435	0.303834	0.285905	0.221308	0.61407	0.494918	0.531052	0.763171	0.84848	0.648226	0.528916	0.505147	0.608175	0.508199	0.430019	0.437653	0.241023	0.63474	0.0150895	0.0058387	0.221018
A14.549.167.Dentition	Other	0.620043	0.878748	0.833103	0.590264	0.722527	0.995083	0.905498	0.148816	0.533236	0.754999	0.792632	0.822853	0.654598	0.186909	0.47134	0.553385	0.685581	0.771668	0.622962	0.768653	0.827524	0.997041	0.950123	0.723075	0.608003	0.944395	0.643821	0.718498	0.624248	0.497179	0.427881	0.708638	0.0935561	0.223194	0.222739	0.357589	0.46594	0.83152	0.640464	0.323975	0.14071	0.425388	0.329075	0.589869	0.719046	0.0478025	0.140609	0.350013
A14.549.885.Tongue	Other	0.226748	0.536581	0.746994	0.370644	0.749922	0.604113	0.627788	0.761199	0.915825	0.650395	0.980027	0.325	0.42976	0.092528	0.630336	0.459403	0.424962	0.344273	0.427567	0.487644	0.596715	0.421827	0.344398	0.722296	0.697128	0.32194	0.481499	0.127901	0.401996	0.101904	0.410107	0.407532	0.448016	0.268278	0.546787	0.825381	0.531285	0.197162	0.0830434	0.130151	0.743723	0.124471	0.238236	0.0203689	0.366811	0.00410962	0.0750263	0.162749
A14.549.Mouth	Other	0.565484	0.304758	0.312987	0.224151	0.126026	0.592373	0.520535	0.0803258	0.106375	0.453368	0.926706	0.843311	0.822944	0.299949	0.795175	0.854649	0.566894	0.430049	0.512243	0.857521	0.0687873	0.729882	0.564392	0.144197	0.432291	0.792017	0.541335	0.684244	0.814743	0.393347	0.883537	0.936404	0.290518	0.397745	0.754725	0.735254	0.447701	0.700593	0.840779	0.764789	0.72872	0.763472	0.852466	0.823815	0.872474	0.0743142	0.0687333	0.324342
A14.724.557.Nasopharynx	Other	0.824433	0.973579	0.951384	0.918652	0.944987	0.895373	0.787096	0.6314	0.943503	0.755947	0.751	0.538305	0.903854	0.561164	0.498578	0.8206	0.920934	0.916968	0.748239	0.572975	0.966754	0.950518	0.879927	0.965074	0.923472	0.903876	0.848718	0.882308	0.694537	0.665166	0.285089	0.450475	0.635703	0.415225	0.222854	0.738988	0.653995	0.670279	0.445204	0.437534	0.58564	0.656581	0.53258	0.709086	0.247284	0.131658	0.0224892	0.30605
A14.724.Pharynx	Other	0.431383	0.778766	0.635705	0.731527	0.920402	0.918185	0.900088	0.702825	0.851623	0.904664	0.716369	0.675954	0.571015	0.1707	0.181634	0.524303	0.486357	0.768283	0.330112	0.226913	0.955052	0.960496	0.903718	0.947806	0.452909	0.838696	0.849724	0.654031	0.128407	0.45473	0.111459	0.171578	0.448421	0.551795	0.0228829	0.151982	0.875102	0.702468	0.428234	0.36099	0.715795	0.41762	0.249363	0.117001	0.149831	0.174645	0.115671	0.135624
A17.815.Skin	Other	0.0659561	0.238577	0.297529	0.077142	0.303558	0.780513	0.877224	0.426193	0.31744	0.74031	0.908256	0.737488	0.234892	0.119515	0.319737	0.329905	0.291944	0.33794	0.334314	0.523055	0.401771	0.739967	0.653403	0.586859	0.392826	0.527804	0.224396	0.403264	0.211981	0.213015	0.406496	0.484093	0.721691	0.850537	0.944979	0.922874	0.867653	0.756719	0.688773	0.933931	0.79989	0.678712	0.435392	0.487012	0.792728	0.091956	0.24625	0.466957
Bladder	Other	0.18059	0.0969925	0.131945	0.0393047	0.168575	0.602319	0.805597	0.0847837	0.190861	0.620849	0.803366	0.257213	0.0416367	0.390498	0.215772	0.2378	0.0356435	0.123406	0.0499019	0.278975	0.77983	0.851065	0.88722	0.950699	0.337699	0.637198	0.676621	0.302018	0.0625907	0.203275	0.482059	0.932426	0.0829403	0.489855	0.513765	0.381634	0.655663	0.491411	0.667457	0.58001	0.466507	0.526332	0.297963	0.396583	0.858201	0.622199	0.782318	0.754958
Breast_Mammary_Tissue	Other	0.17086	0.575656	0.11944	0.0685008	0.523968	0.797906	0.452008	0.0925484	0.192903	0.395841	0.0629807	0.20684	0.137722	0.219762	0.242807	0.194128	0.783589	0.951383	0.92996	0.565064	0.837595	0.829815	0.878282	0.807173	0.956587	0.828677	0.964308	0.63531	0.753839	0.959312	0.747493	0.487122	0.816949	0.562409	0.501575	0.721627	0.377318	0.296363	0.17911	0.275608	0.157937	0.202671	0.418911	0.226163	0.301882	0.629406	0.141779	0.561402
Cells_Transformed_fibroblasts	Other	0.589883	0.270321	0.465976	0.904823	0.178099	0.372421	0.0935139	0.115044	0.436913	0.161171	0.0584293	0.180337	0.646706	0.396997	0.382697	0.928604	0.443539	0.194651	0.135767	0.733918	0.26414	0.611692	0.44514	0.766153	0.457359	0.684452	0.279762	0.474041	0.512886	0.201376	0.481973	0.901344	0.214404	0.281807	0.282114	0.313059	0.258386	0.77966	0.373305	0.140566	0.016146	0.615769	0.10697	0.448133	0.644916	0.49769	0.404654	0.724109
Cervix_Ectocervix	Other	0.241465	0.0822072	0.252706	0.579485	0.0912024	0.505257	0.680765	0.172418	0.135791	0.715717	0.896828	0.953183	0.690963	0.598418	0.947647	0.896832	0.0713962	0.0458336	0.0643972	0.192762	0.164792	0.616372	0.623417	0.133529	0.351378	0.770809	0.709421	0.686475	0.368097	0.10239	0.228215	0.858199	0.335604	0.812492	0.782545	0.536976	0.53408	0.864892	0.959569	0.882696	0.462329	0.891575	0.595783	0.835976	0.975476	0.544023	0.474664	0.871143
Cervix_Endocervix	Other	0.582636	0.627036	0.588258	0.496342	0.64745	0.260768	0.149317	0.504485	0.305677	0.124094	0.438066	0.554487	0.569841	0.865927	0.839713	0.625791	0.192129	0.0966341	0.157767	0.0488422	0.291289	0.20032	0.119522	0.126912	0.155517	0.148423	0.157413	0.205956	0.326245	0.2522	0.429286	0.580062	0.729051	0.530814	0.498083	0.437357	0.351599	0.239837	0.225885	0.313316	0.427178	0.269819	0.356854	0.267812	0.986312	0.974697	0.891571	0.983926
Fallopian_Tube	Other	0.767671	0.337299	0.783385	0.859338	0.648532	0.267853	0.569613	0.922466	0.904457	0.502297	0.964241	0.452494	0.515511	0.752617	0.864644	0.727074	0.174688	0.332735	0.137738	0.117649	0.526888	0.518069	0.574545	0.183004	0.109422	0.447621	0.639914	0.243456	0.170529	0.156137	0.537181	0.515902	0.989557	0.9508	0.915525	0.7028	0.846019	0.572975	0.825587	0.888678	0.904683	0.843629	0.876296	0.578956	0.969173	0.502039	0.639651	0.955649
Kidney_Cortex	Other	0.338579	0.404602	0.546799	0.39878	0.170267	0.263065	0.186099	0.313602	0.296083	0.0818531	0.8782	0.0532326	0.458414	0.515758	0.511165	0.758914	0.106975	0.0638095	0.0485548	0.0918293	0.219525	0.27748	0.152147	0.0271017	0.129778	0.188396	0.28149	0.148586	0.164177	0.0357463	0.0880933	0.543873	0.487561	0.0464437	0.417154	0.79235	0.0406621	0.119081	0.137257	0.0703839	0.122388	0.0599277	0.103361	0.11229	0.822155	0.712401	0.518933	0.624101
Lung	Other	0.806122	0.930225	0.648383	0.738228	0.768611	0.730152	0.603206	0.4385	0.546724	0.56385	0.246596	0.266085	0.559188	0.906479	0.657372	0.592408	0.893333	0.950005	0.754848	0.428285	0.893077	0.857321	0.901513	0.898874	0.856373	0.851918	0.91787	0.61741	0.488329	0.286728	0.224125	0.314618	0.591848	0.653422	0.0896051	0.299188	0.61797	0.453594	0.363941	0.220099	0.328148	0.677038	0.72369	0.542463	0.919874	0.936371	0.754064	0.95735
Minor_Salivary_Gland	Other	0.179496	0.273001	0.389199	0.161116	0.689607	0.347612	0.452802	0.81042	0.665888	0.448843	0.683946	0.536576	0.061405	0.499606	0.588363	0.0690624	0.475873	0.296756	0.347613	0.782213	0.755896	0.423961	0.547844	0.254777	0.636618	0.271118	0.365861	0.389843	0.579827	0.371098	0.857346	0.851448	0.741613	0.37867	0.507583	0.26757	0.623728	0.0807986	0.0503242	0.217292	0.619736	0.124707	0.570205	0.0560627	0.9748	0.634376	0.701169	0.973925
Nerve_Tibial	Other	0.950131	0.878446	0.98575	0.992374	0.893962	0.719493	0.853448	0.9606	0.993375	0.808201	0.595881	0.846806	0.998822	0.600765	0.943292	0.999144	0.669339	0.690408	0.68873	0.423436	0.58523	0.662059	0.600772	0.474996	0.6665	0.735408	0.524568	0.738331	0.864507	0.806766	0.752293	0.849493	0.99117	0.985393	0.97103	0.818445	0.965896	0.883242	0.809742	0.822135	0.977351	0.950788	0.937412	0.797688	0.753262	0.793681	0.813816	0.939278
Ovary	Other	0.347834	0.142282	0.35632	0.390749	0.477544	0.267076	0.522056	0.73643	0.497164	0.312439	0.98194	0.265176	0.345773	0.642194	0.561015	0.683176	0.151867	0.0788702	0.232845	0.604621	0.238765	0.337394	0.341849	0.0949176	0.104979	0.330719	0.153412	0.638837	0.389853	0.46356	0.917692	0.944122	0.880682	0.879063	0.681034	0.521268	0.735587	0.653316	0.545641	0.581735	0.976136	0.751424	0.922501	0.668614	0.999783	0.996105	0.983969	0.999087
Pancreas	Other	0.191081	0.148976	0.0646115	0.212011	0.242537	0.189167	0.0825503	0.184521	0.154162	0.109263	0.079435	0.295605	0.140311	0.0598726	0.444983	0.191194	0.77849	0.76822	0.767115	0.631332	0.266125	0.162082	0.194801	0.488446	0.850592	0.203765	0.638064	0.434623	0.641528	0.506232	0.158571	0.169628	0.782741	0.494641	0.921903	0.940899	0.174911	0.0323002	0.00968703	0.0938688	0.16699	0.0902204	0.573005	0.0449353	0.179721	0.031896	0.106218	0.0746874
Prostate	Other	0.699396	0.544093	0.440982	0.400584	0.799117	0.663473	0.804747	0.877408	0.649042	0.512693	0.946692	0.462992	0.115789	0.842114	0.331425	0.268101	0.434571	0.564812	0.376879	0.717143	0.655455	0.620567	0.735621	0.543182	0.670755	0.73533	0.875095	0.972019	0.500168	0.77524	0.956943	0.89116	0.440626	0.367632	0.22525	0.395234	0.577041	0.579823	0.396863	0.329672	0.662804	0.426262	0.483302	0.442741	0.86209	0.82513	0.673861	0.941454
Skin_Not_Sun_Exposed_(Suprapubic)	Other	0.154155	0.379143	0.221776	0.0757139	0.620844	0.668457	0.490572	0.493051	0.475016	0.407428	0.800263	0.168101	0.215701	0.356218	0.426181	0.37268	0.462672	0.669062	0.690513	0.606615	0.45471	0.625903	0.531691	0.548089	0.759879	0.537036	0.35704	0.0802915	0.680551	0.709141	0.70651	0.679731	0.923503	0.260408	0.902709	0.967758	0.692732	0.235772	0.104239	0.293526	0.463173	0.142524	0.132325	0.013615	0.715332	0.0287986	0.0793993	0.36656
Skin_Sun_Exposed_(Lower_leg)	Other	0.10679	0.422091	0.250639	0.0539579	0.732715	0.796041	0.441911	0.497479	0.510091	0.430006	0.458247	0.152838	0.0517456	0.323671	0.165809	0.185074	0.101202	0.240033	0.112691	0.143906	0.525482	0.625539	0.371334	0.499396	0.294381	0.281069	0.0681058	0.0147618	0.150415	0.252755	0.144633	0.177025	0.909867	0.349456	0.637193	0.686907	0.612468	0.230881	0.0315285	0.091941	0.0838978	0.0513558	0.00405914	0.00794178	0.690053	0.0232074	0.0426036	0.151814
Uterus	Other	0.585898	0.0674607	0.192929	0.582111	0.239086	0.102164	0.491503	0.606487	0.2571	0.298534	0.73715	0.751291	0.619075	0.925789	0.674228	0.604825	0.107956	0.136187	0.0786677	0.12135	0.576827	0.28163	0.364843	0.19196	0.0876273	0.191806	0.0583868	0.146559	0.242703	0.291848	0.437253	0.827798	0.706069	0.866865	0.666986	0.591829	0.768548	0.553743	0.820082	0.891613	0.944995	0.89544	0.998468	0.860309	0.980101	0.691501	0.572789	0.976799
Vagina	Other	0.631449	0.268859	0.627686	0.598983	0.111025	0.139183	0.19705	0.564647	0.281098	0.263822	0.920138	0.709182	0.887904	0.738201	0.977434	0.861805	0.497491	0.0991953	0.315391	0.709031	0.01796	0.174459	0.102637	0.0524647	0.224518	0.215421	0.250131	0.275917	0.891123	0.379801	0.73991	0.872924	0.62427	0.624393	0.98402	0.831585	0.506134	0.527719	0.780858	0.942601	0.900129	0.750553	0.731215	0.864282	0.894254	0.356997	0.223691	0.702297
[truncated: 206 more columns]

## Sheet: Table S5
Table S5. Number of associated motifs for tissues/cell types with significant associations in heritability partition analysis
Cell-type Name	Freq
A15.382.680.Phagocytes	23
A15.382.490.315.583.Neutrophils	18
A15.378.316.Bone.Marrow.Cells	13
A02.835.583.443.800.800.Synovial.Fluid	10
A03.556.500.760.464.Parotid.Gland	8
A03.556.500.760.Salivary.Glands	8
A10.615.789.Serous.Membrane	7
A15.145.Blood	7
A11.382.Endocrine.Cells	6
A15.145.229.637.555.Leukocytes..Mononuclear	6
A15.382.520.604.700.Spleen	6
Adipose_Visceral_(Omentum)	6
Artery_Coronary	6
Skin_Sun_Exposed_(Lower_leg)	6
A10.615.550.599.Mouth.Mucosa	5
A11.118.637.Leukocytes	5
Testis	5
A02.165.Cartilage	4
A03.556.875.500.Esophagus	4
A10.690.467.Muscle..Smooth	4
A11.436.329.Granulosa.Cells	4
A11.443.Erythroid.Cells	4
A11.872.190.260.Embryoid.Bodies	4
A14.549.Mouth	4
A15.382.490.555.567.622.Lymphocytes..Null	4
Artery_Tibial	4
Cells_Transformed_fibroblasts	4
Muscle_Skeletal	4
A02.633.567.850.Quadriceps.Muscle	3
A03.556.875.875.Stomach	3
A05.810.453.324.Kidney.Cortex	3
A08.186.211.132.Brain.Stem	3
A11.329.171.Chondrocytes	3
A11.329.228.Fibroblasts	3
A11.329.372.600.Macrophages..Alveolar	3
A11.329.830.Stromal.Cells	3
A11.627.340.360.Granulocyte.Precursor.Cells	3
A11.872.378.Hematopoietic.Stem.Cells	3
A14.549.167.646.Periodontium	3
A15.378.316.580.Monocytes	3
A17.815.Skin	3
Brain_Spinal_cord_(cervical_c-1)	3
Pancreas	3
Spleen	3
A03.556.124.526.767.Rectum	2
A03.556.249.249.356.Colon	2
A10.615.284.473.Chorion	2
A11.118.637.555.567.569.200.700.T.Lymphocytes..Regulatory	2
A11.497.497.600.Oocytes	2
A11.872.653.Neural.Stem.Cells	2
A14.724.Pharynx	2
Bladder	2
Thyroid	2
Whole_Blood	2
A02.835.583.443.800.Synovial.Membrane	1
A03.556.249.124.Ileum	1
A03.556.249.249.356.668.Colon..Sigmoid	1
A03.556.875.Upper.Gastrointestinal.Tract	1
A03.556.Gastrointestinal.Tract	1
A03.734.Pancreas	1
A04.411.Lung	1
A05.360.319.679.690.Myometrium	1
A05.360.444.492.362.Foreskin	1
A08.186.211.132.810.428.200.Cerebellum	1
A08.186.211.730.885.287.500.571.735.Visual.Cortex	1
A08.186.211.865.428.Metencephalon	1
A10.165.450.300.425.Keloid	1
A10.165.450.300.Cicatrix	1
A10.272.497.Epidermis	1
A10.690.Muscles	1
A11.329.Connective.Tissue.Cells	1
A11.436.348.Hepatocytes	1
A11.436.397.Keratinocytes	1
A11.872.190.Embryonic.Stem.Cells	1
A14.549.885.Tongue	1
A15.145.229.188.Blood.Platelets	1
A15.382.812.260.Dendritic.Cells	1
A15.382.812.522.Macrophages	1
Brain_Anterior_cingulate_cortex_(BA24)	1
Brain_Caudate_(basal_ganglia)	1
Brain_Cerebellar_Hemisphere	1
Brain_Hippocampus	1
Brain_Putamen_(basal_ganglia)	1
Cervix_Ectocervix	1
Esophagus_Mucosa	1
Heart_Atrial_Appendage	1
Skin_Not_Sun_Exposed_(Suprapubic)	1

## Sheet: Table S6
Table S6. P-values for pathway-based analysis
Name	median	AAAA	AAAC	AAAG	AAAT	AACA	AACC	AACG	AACT	AAGA	AAGC	AAGG	AAGT	AATA	AATC	AATG	AATT	ACAA	ACAC	ACAG	ACAT	ACCA	ACCC	ACCG	ACCT	ACGA	ACGC	ACGG	ACGT	ACTA	ACTC	ACTG	ACTT	AGAA	AGAC	AGAG	AGAT	AGCA	AGCC	AGCG	AGCT	AGGA	AGGC	AGGG	AGGT	AGTA	AGTC	AGTG	AGTT
BIOCARTA_SET_PATHWAY	0.00395	0.00051	0.18526	0.000365	0.58603	0.35777	0.00079	0.0007	0.00283	0.00073	0.02293	0.00098	0.00095	0.04649	0.00132	0.56542	0.00186	0.02134	0.02135	0.00834	0.00139	0.00267	0.00132	0.00083	0.00131	0.17822	0.00165	0.40965	0.00416	0.00195	0.00104	0.00211	0.00068	0.55099	0.60279	0.00353	0.00059	0.1714	0.0007	0.00143	0.00158	0.26059	0.87802	0.16709	0.6978	0.00162	0.00057	0.46381	0.00058
BIOCARTA_DNAFRAGMENT_PATHWAY	0.004795	0.00152	0.39076	0.00065	0.63718	0.49888	0.00076	0.00312	0.00254	0.00098	0.02105	0.00099	0.00704	0.05509	0.00167	0.80156	0.00203	0.73047	0.36462	0.05727	0.00303	0.00345	0.0019	0.00254	0.00286	0.47975	0.00105	0.88698	0.00417	0.00234	0.00301	0.00303	0.00235	0.63405	0.4216	0.00542	0.00055	0.06858	0.000459	0.00053	0.00144	0.15788	0.32489	0.04191	0.75016	0.00154	0.00126	0.32941	0.00175
BIOCARTA_MITOCHONDRIA_PATHWAY	0.00862	0.00164	0.54462	0.00109	0.56782	0.69006	0.00091	0.00435	0.00266	0.001	0.02093	0.00105	0.0231	0.11347	0.00159	0.76259	0.00302	0.49665	0.01392	0.02152	0.00177	0.00119	0.000567	0.00069	0.00052	0.08118	0.0028	0.38223	0.01399	0.00213	0.000311	0.00121	0.00071	0.21017	0.31009	0.00169	0.00126	0.11196	0.00111	0.00072	0.00333	0.03451	0.11716	0.00395	0.09086	0.00398	0.002	0.08788	0.00286
BIOCARTA_CASPASE_PATHWAY	0.01083	0.01061	0.70434	0.00161	0.7275	0.89286	0.00214	0.00457	0.00687	0.0036	0.0096	0.00172	0.03113	0.19055	0.00429	0.87095	0.00508	0.76365	0.21964	0.07045	0.00582	0.00562	0.00148	0.00201	0.00566	0.34119	0.00217	0.33547	0.00704	0.00563	0.00692	0.00484	0.00728	0.64489	0.43777	0.00186	0.00174	0.11891	0.00105	0.000253	0.00434	0.04983	0.09654	0.00381	0.09004	0.00843	0.00336	0.06333	0.00535
REACTOME_APOPTOSIS_INDUCED_DNA_FRAGMENTATION	0.01451	0.0015	0.37909	0.00076	0.75645	0.51171	0.00064	0.00187	0.00134	0.00125	0.01673	0.00114	0.01552	0.03594	0.00165	0.60371	0.00203	0.52822	0.18688	0.09144	0.00231	0.00228	0.00076	0.00058	0.00066	0.85761	0.00113	0.97704	0.00297	0.00164	0.000373	0.00112	0.00066	0.86613	0.70009	0.00687	0.00071	0.3015	0.00067	0.00108	0.00113	0.31613	0.6246	0.18944	0.7343	0.00221	0.00121	0.67992	0.00195
REACTOME_APOPTOSIS	0.021315	0.00748	0.01348	0.00472	0.06479	0.10334	0.00083	0.00252	0.00324	0.00424	0.01795	0.01659	0.03911	0.01441	0.00239	0.04612	0.00193	0.74129	0.22627	0.25522	0.02638	0.01148	0.01125	0.00164	0.01	0.58821	0.00524	0.54132	0.0181	0.01568	0.00662	0.00954	0.00281	0.24125	0.22904	0.12657	0.00367	0.03597	0.00096	0.00521	0.000297	0.29406	0.18329	0.15641	0.23092	0.00246	0.0011	0.01519	0.00051
REACTOME_APOPTOTIC_EXECUTION_PHASE	0.026195	0.02263	0.40353	0.00255	0.87521	0.52853	0.00165	0.01192	0.0095	0.01441	0.02023	0.02418	0.01253	0.18067	0.00726	0.47174	0.00932	0.64314	0.52118	0.21981	0.02657	0.00566	0.00482	0.00333	0.00899	0.59214	0.00669	0.59371	0.07824	0.00985	0.00651	0.00793	0.00571	0.4999	0.38065	0.029	0.00215	0.0113	0.00066	0.00054	0.000305	0.22013	0.19041	0.11312	0.36058	0.00553	0.00073	0.18187	0.00161
BIOCARTA_FAS_PATHWAY	0.026245	0.00722	0.19865	0.000392	0.67549	0.64659	0.00261	0.00735	0.00554	0.00168	0.00089	0.00139	0.02562	0.1613	0.00332	0.52198	0.00374	0.87054	0.16526	0.19094	0.0055	0.00605	0.00138	0.0014	0.00098	0.75024	0.00527	0.74617	0.05351	0.00399	0.00206	0.00107	0.00223	0.09013	0.12274	0.000472	0.00189	0.10892	0.00212	0.00108	0.0036	0.01115	0.12516	0.00915	0.1187	0.02687	0.00562	0.61065	0.00493
BIOCARTA_DEATH_PATHWAY	0.036015	0.03762	0.79365	0.00238	0.83043	0.74877	0.00207	0.01068	0.00776	0.01464	0.02761	0.01028	0.02117	0.11828	0.00545	0.67697	0.00529	0.77963	0.41843	0.41206	0.00631	0.00287	0.00481	0.00803	0.00785	0.51771	0.00267	0.76013	0.02341	0.00314	0.01141	0.00816	0.0095	0.80967	0.80807	0.03673	0.00313	0.25856	0.00195	0.00199	0.0083	0.3745	0.38884	0.08427	0.45443	0.02957	0.00518	0.22437	0.00884
REACTOME_THE_NLRP3_INFLAMMASOME	0.046605	0.00443	0.48236	0.01442	0.32899	0.78905	0.00126	0.000177	0.00148	0.01582	0.01154	0.01306	0.00732	0.55784	0.000474	0.89794	0.000468	0.46342	0.12894	0.12889	0.00063	0.00098	0.000389	0.00145	0.00195	0.03436	0.07967	0.39278	0.01925	0.00094	0.00215	0.00131	0.00251	0.85795	0.94027	0.61749	0.00291	0.42943	0.03105	0.00079	0.00175	0.56288	0.83505	0.51846	0.69302	0.00987	0.0008	0.72281	0.00107
BIOCARTA_TNFR1_PATHWAY	0.05096	0.01033	0.29416	0.00066	0.70656	0.58037	0.00295	0.00564	0.00761	0.00228	0.00168	0.00194	0.05196	0.10301	0.00477	0.25941	0.00692	0.75024	0.04215	0.16701	0.00466	0.00307	0.00168	0.00612	0.00213	0.71789	0.00411	0.61478	0.02456	0.00319	0.00784	0.00234	0.00864	0.4333	0.63668	0.00585	0.00288	0.56553	0.00311	0.00311	0.01114	0.06766	0.19902	0.03688	0.21087	0.04996	0.01165	0.91021	0.00971
BIOCARTA_HIVNEF_PATHWAY	0.05777	0.19029	0.64413	0.00353	0.92122	0.70288	0.00207	0.0121	0.00737	0.04772	0.03349	0.02937	0.24069	0.16358	0.00548	0.49261	0.006	0.81918	0.11843	0.20177	0.00834	0.002	0.00361	0.00989	0.0047	0.6962	0.00638	0.58725	0.05466	0.00519	0.01137	0.00815	0.00797	0.83067	0.84589	0.03294	0.01981	0.46468	0.00246	0.00194	0.01191	0.25128	0.19665	0.05922	0.21578	0.24713	0.01697	0.48125	0.01086
REACTOME_INFLAMMASOMES	0.058595	0.01054	0.63303	0.05406	0.3663	0.70016	0.00287	0.00052	0.00068	0.05276	0.03956	0.04705	0.01944	0.3697	0.000235	0.81842	0.000306	0.4006	0.06762	0.19326	0.000483	0.00113	0.00075	0.00194	0.00093	0.02832	0.11153	0.30776	0.04534	0.000437	0.00091	0.0016	0.00138	0.95929	0.9923	0.80444	0.0125	0.6277	0.0416	0.00136	0.00247	0.72007	0.61185	0.5303	0.42576	0.0228	0.00064	0.77764	0.00085
REACTOME_XENOBIOTICS	0.0624	0.13262	0.00926	0.3009	0.00177	0.01065	0.03322	0.34948	0.01017	0.06211	0.24886	0.31694	0.59765	0.000451	0.00856	0.00123	0.00704	0.06497	0.03021	0.05999	0.0075	0.02083	0.12775	0.38363	0.04004	0.55685	0.24116	0.1075	0.59346	0.00478	0.08753	0.02313	0.05529	0.01547	0.07338	0.06552	0.0195	0.72687	0.60082	0.32083	0.93023	0.02885	0.04007	0.15934	0.02912	0.0436	0.64338	0.79644	0.12789
KEGG_APOPTOSIS	0.064435	0.24396	0.79922	0.0109	0.74595	0.74858	0.00462	0.03438	0.01227	0.03838	0.14802	0.04222	0.34545	0.20263	0.01032	0.58846	0.00802	0.61567	0.0901	0.12977	0.01931	0.00481	0.0019	0.0217	0.01798	0.39245	0.00519	0.48513	0.04823	0.01447	0.01627	0.01273	0.01952	0.50269	0.52536	0.01521	0.00895	0.22106	0.00117	0.00187	0.00908	0.21604	0.19827	0.05454	0.17239	0.21198	0.01492	0.25894	0.01239
BIOCARTA_ERYTH_PATHWAY	0.070075	0.02878	0.00393	0.00444	0.07922	0.08837	0.01935	0.09503	0.78249	0.0521	0.07251	0.02018	0.22354	0.25165	0.49767	0.0093	0.05887	0.12978	0.21179	0.05485	0.77967	0.09849	0.11897	0.01554	0.25366	0.0525	0.00459	0.12722	0.00082	0.92409	0.36735	0.35857	0.02552	0.15052	0.13605	0.06172	0.21444	0.07203	0.04237	0.19945	0.07114	0.16961	0.26428	0.27697	0.30693	0.21897	0.08359	0.00121	0.02047
BIOCARTA_STEM_PATHWAY	0.08594	0.00896	0.00392	0.00296	0.14251	0.08238	0.01675	0.026	0.83985	0.04946	0.12208	0.03644	0.1739	0.27355	0.80472	0.01265	0.22129	0.21743	0.16037	0.06979	0.58205	0.03909	0.04476	0.00525	0.02897	0.02333	0.00189	0.05397	0.00099	0.6795	0.09285	0.16192	0.01173	0.40064	0.16767	0.12618	0.57897	0.08058	0.02943	0.07462	0.03388	0.31799	0.19164	0.32214	0.15967	0.23026	0.0294	0.00131	0.02012
REACTOME_ANTIGEN_PROCESSING_CROSS_PRESENTATION	0.089445	0.03025	0.000126	0.23809	0.00068	0.00034	0.00947	0.05202	0.02574	0.08093	0.20259	0.12045	0.21959	0.002	0.02147	0.00091	0.02252	0.13197	0.01288	0.04657	0.06055	0.16258	0.24809	0.0729	0.29801	0.11555	0.00736	0.07327	0.00472	0.12146	0.24056	0.06384	0.10879	0.08001	0.03235	0.35202	0.01754	0.055	0.59846	0.93251	0.22908	0.35449	0.33263	0.50122	0.33742	0.00113	0.09746	0.00143	0.03979
KEGG_BASAL_CELL_CARCINOMA	0.10335	0.01778	0.00053	0.00823	1.41e-05	0.0006	0.09629	0.24308	0.02179	0.02404	0.27392	0.02815	0.67735	0.000492	0.01575	0.00102	0.01361	0.09274	0.39089	0.49437	0.0505	0.14587	0.11544	0.1701	0.11755	0.81213	0.40543	0.79757	0.80209	0.06172	0.23194	0.18807	0.10057	0.00893	0.04737	0.09862	0.01863	0.11875	0.06361	0.03235	0.09178	0.45296	0.11986	0.17538	0.68699	0.00076	0.11762	0.16454	0.06421
BIOCARTA_PITX2_PATHWAY	0.10597	0.22412	0.04392	0.14701	0.02185	0.06579	0.67421	0.13078	0.59276	0.14169	0.48866	0.19623	0.0512	0.16343	0.43881	0.21093	0.38235	0.16408	0.22707	0.12025	0.5271	0.2893	0.29175	0.46529	0.61922	0.50725	0.18051	0.63502	0.154	0.43708	0.56169	0.45532	0.62862	0.03194	0.02034	0.07356	0.03532	0.01035	0.02851	0.14394	0.32267	0.08744	0.23866	0.11329	0.09855	0.05133	0.33532	0.02913	0.38347
REACTOME_CROSS_PRESENTATION_OF_SOLUBLE_EXOGENOUS_ANTIGENS_ENDOSOMES	0.10684	0.01228	0.000126	0.09704	0.000409	0.00093	0.01551	0.03537	0.02827	0.02334	0.04907	0.05907	0.21651	0.00191	0.01913	0.00129	0.01555	0.16839	0.04685	0.1362	0.04283	0.19149	0.21906	0.04611	0.14344	0.29422	0.02597	0.52541	0.00803	0.14723	0.14865	0.06821	0.04939	0.02401	0.01827	0.24542	0.02318	0.10747	0.61094	0.88986	0.15579	0.12108	0.18329	0.31473	0.10427	0.00951	0.07178	0.00306	0.02696
BIOCARTA_IL17_PATHWAY	0.10818	0.67298	0.01413	0.01011	0.86394	0.10728	0.01039	0.13266	0.85279	0.34136	0.08144	0.04885	0.25585	0.58068	0.55383	0.00545	0.14346	0.32145	0.26336	0.02417	0.71832	0.11924	0.68987	0.01119	0.21268	0.02112	0.00199	0.02339	0.00068	0.61896	0.19863	0.46128	0.01106	0.44259	0.23638	0.10897	0.69018	0.11776	0.05868	0.64835	0.11759	0.32965	0.37843	0.45342	0.35989	0.19037	0.03467	0.00124	0.01249
REACTOME_ER_PHAGOSOME_PATHWAY	0.11156	0.04073	0.000132	0.22531	0.000404	0.00086	0.02063	0.03747	0.029	0.11147	0.15288	0.13116	0.38767	0.00058	0.02572	0.000403	0.01459	0.09867	0.04271	0.07079	0.04942	0.29576	0.39419	0.0709	0.30091	0.52783	0.00777	0.27902	0.00563	0.12535	0.33217	0.083	0.07981	0.17931	0.082	0.40801	0.0805	0.20292	0.5378	0.86504	0.30244	0.39227	0.19944	0.37371	0.20607	0.00953	0.13327	0.00493	0.03239
REACTOME_EARLY_PHASE_OF_HIV_LIFE_CYCLE	0.1125	0.11158	0.09143	0.45396	0.03358	0.00384	0.01444	0.51921	0.03066	0.54966	0.52765	0.85597	0.03479	0.00215	0.01285	0.0125	0.0227	0.0115	0.04232	0.0119	0.02058	0.00936	0.10937	0.3732	0.06056	0.03369	0.0721	0.12831	0.14628	0.00645	0.08989	0.0181	0.04452	0.1156	0.03684	0.26352	0.08123	0.44049	0.84168	0.72781	0.23235	0.17752	0.06777	0.46599	0.02421	0.00612	0.00974	0.40226	0.0445
BIOCARTA_GRANULOCYTES_PATHWAY	0.12022	0.11059	0.00157	0.00391	0.18336	0.02527	0.0022	0.13471	0.33831	0.09311	0.16644	0.00643	0.01013	0.21984	0.31711	0.00296	0.06214	0.39977	0.27749	0.09603	0.51564	0.03814	0.58669	0.01314	0.30691	0.04325	0.00444	0.16799	0.00096	0.69922	0.17041	0.36915	0.01274	0.51912	0.12258	0.08002	0.3683	0.01211	0.00757	0.30499	0.01867	0.31033	0.52361	0.1225	0.28307	0.12616	0.01169	2.24e-05	0.01896
REACTOME_REGULATION_OF_ORNITHINE_DECARBOXYLASE_ODC	0.125165	0.03909	0.000511	0.13625	0.00051	0.0025	0.02434	0.05306	0.03143	0.12518	0.12084	0.13011	0.17707	0.0008	0.01584	0.00068	0.01241	0.14927	0.14002	0.29767	0.03931	0.17692	0.52029	0.14308	0.23887	0.39136	0.02234	0.40375	0.0082	0.09176	0.30255	0.19375	0.0511	0.18954	0.09918	0.37118	0.07406	0.19458	0.54425	0.45788	0.20433	0.29261	0.10149	0.22242	0.17478	0.00834	0.06887	0.0024	0.02497
KEGG_MELANOGENESIS	0.12768	0.09781	0.10458	0.16643	0.00562	0.03692	0.33761	0.58749	0.07054	0.3244	0.4645	0.2743	0.69388	0.05406	0.14226	0.00199	0.19699	0.09805	0.28378	0.25242	0.14036	0.35874	0.30651	0.57717	0.62571	0.26171	0.14381	0.12125	0.65102	0.13908	0.68178	0.37187	0.58088	0.00248	0.02354	0.0862	0.0046	0.09165	0.23039	0.15162	0.08502	0.03683	0.03619	0.17612	0.07872	0.00267	0.30934	0.54037	0.15585
REACTOME_SIGNALING_BY_WNT	0.13176	0.03042	0.000189	0.12914	0.00061	0.00205	0.01003	0.04012	0.03005	0.01988	0.10755	0.01248	0.31987	0.0024	0.0085	0.00276	0.01903	0.39819	0.13362	0.35374	0.06132	0.29028	0.3692	0.04675	0.15212	0.27098	0.06111	0.40543	0.0369	0.14213	0.15505	0.10355	0.04653	0.0374	0.01793	0.12486	0.03492	0.07551	0.41032	0.72856	0.17532	0.06821	0.12741	0.08097	0.08952	0.00937	0.07492	0.00357	0.03142
REACTOME_CDK_MEDIATED_PHOSPHORYLATION_AND_REMOVAL_OF_CDC6	0.1323	0.01261	6.4e-05	0.10751	0.000143	0.00087	0.01276	0.03103	0.03129	0.06916	0.14738	0.10754	0.22123	0.000296	0.01814	0.000431	0.01357	0.19366	0.13013	0.2953	0.06631	0.25894	0.37673	0.03531	0.24701	0.44956	0.01743	0.31103	0.00552	0.19784	0.28374	0.14933	0.06225	0.16739	0.06291	0.32346	0.0763	0.19254	0.47487	0.70923	0.19805	0.35328	0.23316	0.36352	0.21761	0.01053	0.08643	0.00262	0.02994
REACTOME_ADENYLATE_CYCLASE_INHIBITORY_PATHWAY	0.132795	0.13792	0.09761	0.34845	0.03301	0.1091	0.19734	0.42541	0.3309	0.08974	0.05104	0.08857	0.29988	0.20798	0.23409	0.09611	0.3169	0.69909	0.13482	0.1475	0.71681	0.26168	0.06125	0.61814	0.71426	0.28412	0.16861	0.19619	0.22622	0.60182	0.63013	0.55315	0.76335	0.00417	0.02701	0.25018	0.00288	0.0415	0.07841	0.22953	0.08012	0.03605	0.07482	0.18054	0.03846	0.02122	0.09436	0.48479	0.15007
REACTOME_ADENYLATE_CYCLASE_ACTIVATING_PATHWAY	0.136745	0.21406	0.16403	0.23944	0.1098	0.2401	0.36082	0.85394	0.48874	0.04369	0.01911	0.03479	0.25597	0.51942	0.46407	0.36305	0.29892	0.73189	0.09739	0.10362	0.81579	0.20741	0.11743	0.93382	0.85537	0.27087	0.2082	0.19547	0.32018	0.61542	0.78069	0.77866	0.8588	0.00592	0.01809	0.17401	0.00171	0.01534	0.1128	0.18059	0.06149	0.03627	0.08677	0.13247	0.05864	0.01356	0.06323	0.31671	0.0753
REACTOME_SIGNALLING_TO_RAS	0.13847	0.19721	0.22703	0.32572	0.35512	0.28939	0.0093	0.01172	0.01439	0.14055	0.25898	0.21727	0.09212	0.51709	0.07338	0.57807	0.1784	0.02602	0.06318	0.09591	0.04021	0.03633	0.01731	0.00787	0.01565	0.15098	0.30282	0.28436	0.14742	0.0175	0.01263	0.0147	0.01431	0.19683	0.07479	0.3909	0.0951	0.06531	0.0335	0.09694	0.00843	0.12883	0.19475	0.29052	0.04558	0.24159	0.01902	0.41242	0.04374
REACTOME_CDT1_ASSOCIATION_WITH_THE_CDC6_ORC_ORIGIN_COMPLEX	0.140865	0.0555	0.00063	0.22108	0.00105	0.00393	0.0137	0.03559	0.02773	0.083	0.1173	0.09925	0.15886	0.00355	0.01761	0.0026	0.01528	0.34397	0.14549	0.44314	0.04129	0.20122	0.36706	0.04849	0.1643	0.10053	0.02154	0.47092	0.00788	0.18102	0.16116	0.13365	0.03564	0.13704	0.07029	0.17605	0.15109	0.25249	0.52679	0.94373	0.44523	0.16467	0.22186	0.18116	0.14197	0.02872	0.11034	0.00205	0.04074
REACTOME_AUTODEGRADATION_OF_THE_E3_UBIQUITIN_LIGASE_COP1	0.14216	0.0286	0.000149	0.12851	0.00068	0.00138	0.00487	0.03025	0.03742	0.06022	0.10386	0.08973	0.3388	0.00168	0.01167	0.0012	0.01528	0.18491	0.08508	0.15216	0.07395	0.09293	0.32082	0.08158	0.28962	0.53496	0.02748	0.57149	0.00769	0.23001	0.35795	0.15198	0.08064	0.09357	0.0327	0.31667	0.03869	0.17867	0.47263	0.77227	0.16846	0.30423	0.22868	0.35121	0.17102	0.01179	0.08863	0.00338	0.02908
REACTOME_ACTIVATION_OF_NF_KAPPAB_IN_B_CELLS	0.144105	0.01525	4.51e-05	0.06889	0.000415	0.00079	0.00751	0.05662	0.03349	0.07791	0.28676	0.21028	0.3878	0.000376	0.01787	7.9e-05	0.01601	0.08184	0.05426	0.1718	0.07257	0.29355	0.45528	0.21678	0.47011	0.46067	0.07251	0.55069	0.00991	0.27933	0.52292	0.33372	0.17133	0.25376	0.09364	0.39329	0.11782	0.32944	0.56932	0.77969	0.33115	0.41176	0.37337	0.4258	0.3036	0.02197	0.04343	0.00522	0.03642
KEGG_NON_HOMOLOGOUS_END_JOINING	0.14489	0.08271	0.72882	0.53439	0.09108	0.29985	0.55106	0.08623	0.02334	0.32166	0.20484	0.55713	0.17511	0.01194	0.04759	0.16478	0.01156	0.0832	0.15833	0.0913	0.00994	0.07042	0.0897	0.04018	0.01295	0.32991	0.04186	0.28679	0.20703	0.00787	0.00953	0.00682	0.00873	0.1842	0.06365	0.03142	0.40815	0.81155	0.08124	0.10216	0.33066	0.03146	0.00723	0.031	0.00888	0.3565	0.37639	0.68049	0.06746
REACTOME_P53_DEPENDENT_G1_DNA_DAMAGE_RESPONSE	0.144915	0.04005	0.000227	0.15548	0.00074	0.00302	0.00732	0.04106	0.05708	0.07194	0.13334	0.071	0.43114	0.00159	0.01281	0.00093	0.01863	0.21304	0.08729	0.14361	0.09712	0.11881	0.3561	0.07535	0.36145	0.75596	0.05064	0.60007	0.01616	0.32396	0.45299	0.12891	0.12848	0.06207	0.02945	0.29333	0.02739	0.20032	0.58528	0.63071	0.24438	0.14624	0.18133	0.26302	0.10373	0.01986	0.15801	0.00508	0.03587
REACTOME_REGULATION_OF_MRNA_STABILITY_BY_PROTEINS_THAT_BIND_AU_RICH_ELEMENTS	0.148665	0.06813	0.00415	0.25151	0.01057	0.03401	0.07005	0.04288	0.14534	0.11567	0.19867	0.17394	0.54148	0.02152	0.08265	0.01117	0.04493	0.39988	0.15302	0.2901	0.12038	0.7171	0.76443	0.13191	0.42333	0.18241	0.03479	0.18594	0.00998	0.37011	0.34021	0.20443	0.10038	0.09432	0.0564	0.13789	0.09214	0.40212	0.54854	0.60771	0.32644	0.13251	0.14138	0.1892	0.04709	0.03976	0.18338	0.00724	0.06844
REACTOME_SCF_BETA_TRCP_MEDIATED_DEGRADATION_OF_EMI1	0.155265	0.0173	0.00028	0.14938	0.00054	0.00196	0.01369	0.03892	0.03426	0.06928	0.20317	0.10798	0.27036	0.00176	0.01864	0.00155	0.01445	0.24379	0.0628	0.20422	0.06535	0.20922	0.32426	0.0593	0.20711	0.39202	0.0227	0.36109	0.00701	0.22141	0.23796	0.14411	0.06349	0.14469	0.06624	0.32267	0.04266	0.17087	0.46498	0.91562	0.21601	0.37711	0.37525	0.42116	0.29119	0.0077	0.06528	0.00318	0.0251
REACTOME_METABOLISM_OF_RNA	0.15613	0.05736	0.01007	0.13144	0.00574	0.0693	0.10344	0.33483	0.29389	0.11925	0.28455	0.04984	0.85743	0.01027	0.08733	0.02792	0.09179	0.51928	0.49874	0.5757	0.12711	0.5313	0.27844	0.14824	0.26285	0.6246	0.15726	0.42289	0.18337	0.25419	0.18802	0.10371	0.1849	0.0095	0.0208	0.03367	0.07807	0.20363	0.59251	0.30784	0.40582	0.03343	0.10359	0.08764	0.0165	0.0258	0.22734	0.01103	0.14737
REACTOME_P53_INDEPENDENT_G1_S_DNA_DAMAGE_CHECKPOINT	0.157775	0.04049	7.2e-05	0.14155	0.0011	0.00055	0.0129	0.02493	0.02906	0.0862	0.16787	0.12803	0.363	0.00213	0.02097	0.00051	0.01614	0.1657	0.074	0.12704	0.06148	0.26257	0.41738	0.07081	0.26333	0.58254	0.02297	0.60642	0.00605	0.15369	0.27881	0.10115	0.05889	0.16186	0.06151	0.29866	0.07933	0.23497	0.55672	0.88661	0.25669	0.40237	0.31273	0.46258	0.22812	0.01152	0.12362	0.00309	0.03327
REACTOME_IMMUNE_SYSTEM	0.1578	0.03434	0.00949	0.02104	0.14102	0.10062	0.01919	0.09739	0.03145	0.01346	0.04329	0.01878	0.46248	0.1568	0.0184	0.28788	0.02373	0.43999	0.20493	0.56557	0.01388	0.06134	0.00584	0.00795	0.01216	0.49222	0.08867	0.56239	0.33052	0.03087	0.01116	0.03779	0.01627	0.13323	0.2813	0.15526	0.30506	0.31992	0.20049	0.09812	0.11739	0.12637	0.468	0.30004	0.06263	0.13255	0.03879	0.16416	0.10556
KEGG_CYTOKINE_CYTOKINE_RECEPTOR_INTERACTION	0.15791	0.31892	0.0901	0.37487	0.02139	0.10125	0.12922	0.22532	0.15941	0.6063	0.40602	0.47757	0.38804	0.06965	0.15987	0.17237	0.02625	0.04881	0.32624	0.19441	0.56509	0.12865	0.45655	0.42896	0.71655	0.87739	0.80784	0.97074	0.52242	0.41297	0.41593	0.56889	0.20739	0.15689	0.0454	0.14789	0.01994	0.00904	0.02073	0.19555	0.066	0.51581	0.71145	0.58237	0.73759	0.02553	0.02545	0.00876	0.02598
KEGG_JAK_STAT_SIGNALING_PATHWAY	0.15884	0.18335	0.38981	0.14364	0.43751	0.31395	0.09996	0.04049	0.21336	0.38465	0.59495	0.20158	0.4314	0.23682	0.47859	0.04384	0.16014	0.10876	0.13062	0.4024	0.14709	0.13388	0.07723	0.06026	0.19954	0.53558	0.46792	0.8684	0.25647	0.18959	0.08654	0.1451	0.04832	0.26887	0.15061	0.02931	0.43646	0.00894	0.00554	0.06012	0.08327	0.1498	0.1544	0.08709	0.43875	0.23675	0.20521	0.00197	0.17066
KEGG_LINOLEIC_ACID_METABOLISM	0.16068	0.35413	0.028	0.37863	0.05013	0.0551	0.07557	0.85425	0.12654	0.25032	0.37572	0.54982	0.25674	0.01403	0.08735	0.01385	0.07852	0.11468	0.21662	0.18553	0.1103	0.18179	0.51108	0.813	0.32188	0.3864	0.58048	0.25154	0.40229	0.05329	0.4352	0.32815	0.41371	0.17615	0.1278	0.13591	0.19289	0.67602	0.81571	0.62579	0.57444	0.121	0.26193	0.43282	0.14305	0.34539	0.25686	0.54161	0.41089
BIOCARTA_GSK3_PATHWAY	0.163185	0.53476	0.20859	0.77165	0.03685	0.45258	0.01775	0.27056	0.25475	0.44762	0.62499	0.37043	0.72763	0.22332	0.14776	0.47801	0.07466	0.87798	0.2989	0.33157	0.31444	0.13533	0.01235	0.05057	0.16273	0.84158	0.66741	0.96618	0.79978	0.68265	0.07592	0.16364	0.22801	0.33083	0.08311	0.30958	0.35373	0.1322	0.00198	0.04905	0.14212	0.33071	0.21895	0.18149	0.18287	0.64642	0.14095	0.03398	0.35363
REACTOME_REGULATION_OF_APOPTOSIS	0.164095	0.10753	0.000517	0.2174	0.00285	0.0043	0.03454	0.03009	0.04535	0.15406	0.24251	0.09464	0.30186	0.00229	0.03202	0.0017	0.02471	0.26357	0.06898	0.21221	0.07596	0.37431	0.50067	0.0699	0.33612	0.46943	0.01247	0.38977	0.00643	0.22361	0.37973	0.23352	0.08044	0.09363	0.02214	0.09687	0.03963	0.03305	0.089	0.39108	0.04263	0.2109	0.17509	0.18484	0.14683	0.00942	0.08104	0.00082	0.0331
REACTOME_DESTABILIZATION_OF_MRNA_BY_AUF1_HNRNP_D0	0.164245	0.01814	0.000102	0.12723	0.00054	0.00063	0.01729	0.01827	0.03599	0.08106	0.16944	0.12658	0.2671	0.00109	0.02815	0.00081	0.01897	0.16573	0.10974	0.27423	0.08158	0.34708	0.53594	0.05498	0.34104	0.51171	0.02216	0.55375	0.00507	0.23724	0.3659	0.20768	0.08337	0.20526	0.05945	0.34695	0.09166	0.22115	0.5314	0.68558	0.20096	0.49917	0.35811	0.49032	0.33285	0.01449	0.11318	0.00274	0.04097
REACTOME_P38MAPK_EVENTS	0.16612	0.05019	0.38814	0.25964	0.19186	0.27877	0.0153	0.05556	0.01906	0.27819	0.23003	0.52891	0.09768	0.1814	0.04031	0.24347	0.10994	0.07648	0.10592	0.29949	0.03734	0.1067	0.03352	0.0067	0.01525	0.06765	0.63858	0.28481	0.19643	0.02596	0.00796	0.00988	0.01177	0.18202	0.1729	0.44544	0.287	0.60831	0.02705	0.02823	0.01612	0.1216	0.07042	0.20201	0.01248	0.35315	0.02507	0.51176	0.06898
REACTOME_CD28_DEPENDENT_PI3K_AKT_SIGNALING	0.168955	0.69217	0.55382	0.58134	0.25617	0.70352	0.15767	0.85485	0.73127	0.25783	0.11552	0.19023	0.55622	0.42792	0.34525	0.40366	0.6954	0.73087	0.29242	0.30985	0.40672	0.36047	0.08516	0.70458	0.58062	0.60788	0.1205	0.78043	0.29264	0.52955	0.58012	0.20758	0.90457	0.03811	0.02315	0.11989	0.08519	0.2497	0.00478	0.10092	0.15356	0.07103	0.02863	0.14732	0.02685	0.62442	0.08579	0.17311	0.75918
REACTOME_APC_C_CDC20_MEDIATED_DEGRADATION_OF_MITOTIC_PROTEINS	0.17032	0.0484	0.000407	0.24616	0.00135	0.00214	0.02217	0.061	0.03474	0.11139	0.22673	0.11755	0.41502	0.00267	0.0218	0.00351	0.02067	0.35618	0.16809	0.37467	0.07553	0.28144	0.63173	0.1206	0.25452	0.31864	0.01975	0.27364	0.01128	0.14993	0.25881	0.18721	0.07395	0.16354	0.04412	0.19329	0.09218	0.18746	0.42949	0.58811	0.39388	0.25818	0.10648	0.23783	0.16259	0.02156	0.19071	0.00699	0.05005
KEGG_PROTEASOME	0.1707	0.09047	0.00099	0.18868	0.00568	0.00234	0.00985	0.02804	0.02597	0.16587	0.2218	0.11863	0.17401	0.00275	0.01751	0.00101	0.01485	0.17149	0.14005	0.29709	0.06292	0.14463	0.46434	0.10825	0.28815	0.33935	0.02194	0.4353	0.00595	0.16944	0.26491	0.21304	0.05291	0.20242	0.11183	0.31094	0.08315	0.11463	0.35748	0.79905	0.09758	0.29758	0.2554	0.23605	0.28608	0.00819	0.04363	0.00202	0.01984
REACTOME_SIGNALING_BY_FGFR1_MUTANTS	0.17364	0.28553	0.02663	0.34484	0.02618	0.0281	0.00384	0.08897	0.01909	0.26424	0.16775	0.17213	0.46082	0.04368	0.01849	0.06569	0.03029	0.77141	0.51249	0.32666	0.43933	0.16856	0.19767	0.26517	0.37527	0.20112	0.11478	0.15659	0.0953	0.20982	0.20165	0.25216	0.31065	0.19854	0.24205	0.73398	0.04106	0.1199	0.01026	0.41552	0.02589	0.29439	0.4128	0.46306	0.31921	0.01365	0.01787	0.2755	0.07411
REACTOME_TRANSCRIPTIONAL_REGULATION_OF_WHITE_ADIPOCYTE_DIFFERENTIATION	0.175785	0.04286	0.00668	0.03483	0.09625	0.00583	0.1883	0.09517	0.17545	0.17263	0.76961	0.11759	0.16757	0.06245	0.43601	0.00487	0.34968	0.00434	0.01668	0.01893	0.11117	0.28649	0.81014	0.52869	0.67205	0.20568	0.06915	0.2536	0.0548	0.27178	0.6932	0.47107	0.32375	0.06076	0.05243	0.05499	0.10908	0.29227	0.16959	0.45936	0.62503	0.03588	0.05256	0.06323	0.01738	0.09223	0.58608	0.02079	0.38209
REACTOME_ASSEMBLY_OF_THE_PRE_REPLICATIVE_COMPLEX	0.176315	0.05463	0.0011	0.26897	0.00271	0.00921	0.01341	0.03845	0.04637	0.05867	0.02451	0.0764	0.12555	0.01077	0.02297	0.00423	0.02272	0.24077	0.10708	0.24552	0.05484	0.24088	0.47449	0.0902	0.24538	0.10947	0.03611	0.58742	0.01046	0.3088	0.3262	0.16827	0.0699	0.23462	0.10976	0.32117	0.23304	0.32188	0.31425	0.94171	0.51136	0.25922	0.17089	0.2819	0.2052	0.04869	0.06714	0.0043	0.05865
KEGG_DRUG_METABOLISM_CYTOCHROME_P450	0.17875	0.62874	0.17577	0.81183	0.0318	0.07657	0.05369	0.12412	0.05195	0.36171	0.25759	0.74148	0.77099	0.02453	0.06248	0.01317	0.02796	0.27951	0.15111	0.08834	0.1282	0.01414	0.45329	0.59268	0.36308	0.37196	0.13354	0.05593	0.25733	0.0726	0.43993	0.14887	0.40421	0.11845	0.20098	0.44835	0.07431	0.85746	0.73237	0.72371	0.38624	0.13908	0.17166	0.63938	0.04529	0.16916	0.40816	0.60611	0.16137
BIOCARTA_EGFR_SMRTE_PATHWAY	0.179655	0.03897	0.01267	0.00613	0.33836	0.04034	0.0737	0.52398	0.48712	0.02526	0.1263	0.01324	0.01081	0.22336	0.30312	0.05955	0.30936	0.07213	0.39125	0.23077	0.47254	0.27044	0.49307	0.01545	0.2596	0.15682	0.02947	0.0628	0.10904	0.67785	0.09821	0.83996	0.04203	0.29852	0.01174	0.09054	0.07025	0.04195	0.0785	0.01077	0.00531	0.24016	0.09564	0.24142	0.30875	0.15632	0.02724	0.00927	0.02736
REACTOME_METABOLISM_OF_MRNA	0.180925	0.03182	0.01336	0.12787	0.00632	0.10507	0.24032	0.27201	0.27229	0.07268	0.18847	0.04028	0.67025	0.03248	0.13116	0.0967	0.07697	0.64875	0.5783	0.63028	0.11434	0.55777	0.40051	0.17281	0.27012	0.54617	0.16731	0.34218	0.13773	0.34153	0.18909	0.14254	0.13294	0.02299	0.02147	0.10014	0.04577	0.31501	0.40992	0.38776	0.3382	0.09929	0.18048	0.12117	0.07879	0.02591	0.17251	0.00651	0.06961
KEGG_METABOLISM_OF_XENOBIOTICS_BY_CYTOCHROME_P450	0.182565	0.45127	0.07509	0.56816	0.03268	0.05	0.08486	0.19733	0.09508	0.21365	0.10385	0.59376	0.42636	0.01083	0.09497	0.00896	0.05091	0.2523	0.28605	0.16921	0.15094	0.01685	0.52587	0.81064	0.44024	0.23434	0.14094	0.06143	0.25627	0.06402	0.62097	0.18025	0.49466	0.05286	0.07838	0.19825	0.04475	0.79859	0.80283	0.51162	0.57994	0.07085	0.07056	0.41922	0.02615	0.12011	0.69226	0.57534	0.36637
REACTOME_SIGNAL_REGULATORY_PROTEIN_SIRP_FAMILY_INTERACTIONS	0.18646	0.17653	0.65256	0.10317	0.94953	0.66798	0.68713	0.00796	0.13475	0.42294	0.1969	0.22153	0.10671	0.78305	0.42843	0.14162	0.21128	0.04273	0.06277	0.0668	0.07369	0.43398	0.54821	0.01533	0.04136	0.05121	0.17153	0.09121	0.09279	0.06972	0.01466	0.05046	0.01245	0.37253	0.63794	0.11923	0.89367	0.30034	0.95732	0.54293	0.15366	0.19292	0.22175	0.34978	0.17949	0.57165	0.13882	0.50346	0.06381
KEGG_ETHER_LIPID_METABOLISM	0.1879	0.11091	0.06056	0.04262	0.28499	0.07247	0.07635	0.43696	0.22209	0.04195	0.14931	0.20163	0.03757	0.27595	0.26528	0.4335	0.23807	0.26251	0.40317	0.39179	0.37621	0.35231	0.03653	0.04262	0.06345	0.12848	0.21977	0.30703	0.24811	0.20963	0.04711	0.06442	0.18754	0.172	0.14388	0.07339	0.57904	0.27431	0.10816	0.40338	0.06727	0.39296	0.72912	0.73063	0.53248	0.18402	0.02662	0.27122	0.45972
REACTOME_M_G1_TRANSITION	0.19226	0.14464	0.00215	0.40153	0.00354	0.02337	0.03069	0.04133	0.11216	0.12752	0.04954	0.0925	0.27406	0.01183	0.04119	0.00682	0.03111	0.27692	0.10819	0.17969	0.09979	0.39956	0.63457	0.09112	0.49773	0.27556	0.12331	0.77173	0.03478	0.48016	0.58249	0.18503	0.17515	0.28777	0.04975	0.14053	0.27205	0.27544	0.29527	0.82153	0.64231	0.21763	0.13501	0.17699	0.21233	0.07715	0.09453	0.00141	0.13312
BIOCARTA_PTEN_PATHWAY	0.19242	0.92707	0.81292	0.78878	0.62016	0.39086	0.00876	0.02421	0.01755	0.41492	0.28432	0.24752	0.72762	0.58931	0.01132	0.77538	0.01904	0.80761	0.43379	0.25868	0.49667	0.17485	0.07682	0.07031	0.05852	0.5063	0.41233	0.50003	0.31254	0.07602	0.01423	0.08936	0.02012	0.18379	0.20876	0.45749	0.0745	0.35439	0.1857	0.76834	0.02059	0.10646	0.46971	0.54641	0.29049	0.30703	0.09135	0.7773	0.01384
REACTOME_REGULATION_OF_INSULIN_SECRETION_BY_ACETYLCHOLINE	0.193815	0.08947	0.28526	0.05605	0.2062	0.45253	0.3506	0.68463	0.36658	0.03633	0.22677	0.04223	0.38382	0.26024	0.25255	0.41285	0.52112	0.77657	0.39189	0.40174	0.15494	0.28694	0.02266	0.01692	0.01626	0.01481	0.13576	0.00462	0.14882	0.17242	0.06312	0.10419	0.09653	0.00773	0.04418	0.01288	0.12996	0.39003	0.38548	0.43609	0.8295	0.00362	0.05264	0.02612	0.04516	0.35407	0.62915	0.63519	0.61111
REACTOME_VIF_MEDIATED_DEGRADATION_OF_APOBEC3G	0.19501	0.01947	0.000284	0.15742	0.00096	0.003	0.01576	0.03961	0.04758	0.08581	0.16909	0.14206	0.11068	0.00325	0.03209	0.00167	0.02068	0.20434	0.1519	0.34303	0.08363	0.26424	0.38714	0.05617	0.22445	0.27168	0.02461	0.55522	0.00621	0.22726	0.26769	0.15928	0.06171	0.23999	0.09289	0.46027	0.10737	0.26318	0.58607	0.91476	0.24829	0.48183	0.38451	0.51378	0.29758	0.01997	0.1109	0.0014	0.04338
REACTOME_PURINE_RIBONUCLEOSIDE_MONOPHOSPHATE_BIOSYNTHESIS	0.195145	0.27439	0.36537	0.12481	0.36771	0.33779	0.42403	0.86825	0.90818	0.04688	0.06667	0.06598	0.2308	0.76731	0.83217	0.3042	0.83042	0.3449	0.36923	0.26397	0.46158	0.63788	0.46451	0.31712	0.34257	0.08185	0.18462	0.02015	0.0961	0.4013	0.4564	0.14769	0.54086	0.04301	0.06116	0.07337	0.35575	0.23525	0.37607	0.49716	0.69791	0.03632	0.04847	0.12356	0.01718	0.36559	0.44253	0.46808	0.81924
REACTOME_SLBP_DEPENDENT_PROCESSING_OF_REPLICATION_DEPENDENT_HISTONE_PRE_MRNAS	0.19849	0.02915	0.39762	0.17365	0.14365	0.60095	0.01935	0.56522	0.35524	0.04536	0.35823	0.16063	0.82592	0.44425	0.17009	0.34734	0.2728	0.63093	0.04953	0.1676	0.14428	0.01482	0.00793	0.06518	0.03061	0.07774	0.51022	0.23618	0.5988	0.23583	0.05562	0.0103	0.27925	0.00898	0.05352	0.06379	0.09683	0.59315	0.67934	0.71488	0.54143	0.01279	0.0715	0.26496	0.01542	0.58281	0.08262	0.61613	0.31723
REACTOME_VITAMIN_B5_PANTOTHENATE_METABOLISM	0.20124	0.25872	0.37218	0.44179	0.13901	0.19656	0.19441	0.17099	0.00939	0.46827	0.25041	0.3192	0.04897	0.02915	0.00835	0.26837	0.01454	0.76282	0.47629	0.65819	0.03978	0.08779	0.12564	0.07879	0.01887	0.00551	0.03215	0.00253	0.02002	0.00877	0.00994	0.04332	0.00891	0.39024	0.75599	0.15407	0.62055	0.51844	0.84252	0.22392	0.21937	0.18743	0.10878	0.05234	0.03836	0.12622	0.43452	0.4781	0.11163
BIOCARTA_EGF_PATHWAY	0.20242	0.08079	0.1047	0.27229	0.08904	0.08048	0.0167	0.15068	0.05475	0.17069	0.29285	0.2289	0.20621	0.1907	0.08342	0.45331	0.21576	0.21061	0.4897	0.25851	0.31898	0.17592	0.13414	0.20681	0.31092	0.1479	0.20263	0.12153	0.0841	0.11525	0.10803	0.23261	0.18694	0.21472	0.01875	0.28329	0.02696	0.13767	0.13709	0.3024	0.02557	0.32363	0.19448	0.25721	0.25269	0.09504	0.06808	0.1861	0.15643
KEGG_GLYOXYLATE_AND_DICARBOXYLATE_METABOLISM	0.20301	0.34001	0.09555	0.09897	0.03968	0.02397	0.38166	0.77118	0.23737	0.27124	0.34107	0.15323	0.88116	0.04737	0.32053	0.07098	0.17907	0.14276	0.27006	0.28938	0.1699	0.66509	0.8181	0.58483	0.74311	0.57382	0.64538	0.6445	0.76644	0.3996	0.93964	0.68707	0.73187	0.09864	0.15042	0.12583	0.09576	0.23036	0.66961	0.58201	0.91308	0.14579	0.12337	0.08412	0.11344	0.09833	0.43908	0.67495	0.57806
REACTOME_SYNTHESIS_OF_DNA	0.203405	0.07344	0.0032	0.39312	0.0034	0.00888	0.05837	0.2336	0.14016	0.26324	0.38216	0.32617	0.38067	0.00142	0.03757	0.0016	0.03183	0.15344	0.23896	0.29405	0.06597	0.26781	0.51094	0.0894	0.30396	0.30481	0.08796	0.69483	0.10993	0.15542	0.57861	0.10229	0.18218	0.24681	0.10882	0.24811	0.36694	0.56153	0.86186	0.90666	0.91503	0.14414	0.08588	0.20085	0.08554	0.08675	0.22608	0.01375	0.21776
BIOCARTA_BLYMPHOCYTE_PATHWAY	0.203445	0.04942	0.33718	0.06034	0.09335	0.34228	0.29869	0.2344	0.43463	0.06176	0.39008	0.15063	0.19317	0.04284	0.49365	0.21969	0.25274	0.4551	0.35118	0.52609	0.17982	0.44273	0.03548	0.07233	0.1175	0.53712	0.48594	0.68486	0.48625	0.166	0.2382	0.15337	0.26705	0.04266	0.09648	0.03713	0.17611	0.05077	0.00895	0.01336	0.08463	0.02606	0.01289	0.01589	0.01129	0.31182	0.11522	0.05863	0.80538
BIOCARTA_GLYCOLYSIS_PATHWAY	0.204295	0.88723	0.28802	0.96893	0.37709	0.13221	0.14156	0.81336	0.3722	0.8698	0.9768	0.68698	0.83395	0.06491	0.29628	0.0497	0.34541	0.58628	0.38847	0.2947	0.45065	0.2629	0.66392	0.9395	0.80644	0.07089	0.02002	0.0062	0.03267	0.15326	0.9114	0.49337	0.63554	0.14403	0.1591	0.14093	0.09274	0.53987	0.6202	0.45916	0.99345	0.21258	0.31522	0.18236	0.16311	0.08952	0.81805	0.58641	0.61388
REACTOME_SIGNALING_BY_FGFR1_FUSION_MUTANTS	0.20617	0.49021	0.02518	0.37203	0.1329	0.04354	0.00327	0.04845	0.02301	0.3503	0.21244	0.18075	0.76869	0.1005	0.01215	0.05814	0.09319	0.77815	0.20321	0.20791	0.39192	0.11147	0.12647	0.35105	0.35612	0.10765	0.04136	0.06212	0.06329	0.17058	0.14112	0.13367	0.35476	0.15877	0.11042	0.48343	0.01524	0.08809	0.02199	0.56169	0.01738	0.22547	0.43648	0.43149	0.32466	0.0034	0.00992	0.15024	0.03831
REACTOME_APC_C_CDH1_MEDIATED_DEGRADATION_OF_CDC20_AND_OTHER_APC_C_CDH1_TARGETED_PROTEINS_IN_LATE_MITOSIS_EARLY_G1	0.20804	0.06718	0.000458	0.24185	0.0019	0.00152	0.01552	0.07837	0.02646	0.15986	0.16945	0.12203	0.37174	0.0013	0.0169	0.00278	0.01413	0.37401	0.23321	0.40705	0.10024	0.3557	0.8663	0.16364	0.41555	0.33265	0.02503	0.15287	0.00857	0.10986	0.27503	0.34819	0.05862	0.28196	0.06912	0.29864	0.08886	0.2224	0.49553	0.73506	0.34504	0.39407	0.16367	0.25622	0.16388	0.01375	0.09646	0.00668	0.02783
REACTOME_DOWNSTREAM_SIGNALING_EVENTS_OF_B_CELL_RECEPTOR_BCR	0.20895	0.07914	0.00067	0.20877	0.00355	0.00866	0.03852	0.0817	0.08422	0.17075	0.20785	0.25593	0.57032	0.00327	0.03876	0.00057	0.02952	0.13951	0.08333	0.2279	0.08986	0.32287	0.40994	0.24329	0.4265	0.84095	0.18898	0.85455	0.03229	0.21201	0.62121	0.17381	0.28398	0.30491	0.08068	0.31179	0.12675	0.50199	0.61669	0.61817	0.47657	0.3527	0.27	0.38721	0.1396	0.12442	0.25272	0.01443	0.13041
REACTOME_INTERFERON_GAMMA_SIGNALING	0.20914	0.01006	0.36939	0.18837	0.09797	0.29204	0.11402	0.54416	0.10737	0.01794	0.14561	0.06433	0.0491	0.07383	0.08861	0.23917	0.202	0.02284	0.10503	0.21332	0.02956	0.18402	0.12739	0.21073	0.06082	0.37847	0.17181	0.27962	0.36498	0.08588	0.04908	0.12258	0.10939	0.35241	0.5827	0.3685	0.87511	0.8978	0.70012	0.3529	0.63993	0.02144	0.01372	0.02676	0.02461	0.88513	0.53611	0.86547	0.54005
REACTOME_MITOTIC_M_M_G1_PHASES	0.209615	0.24561	0.00744	0.12298	0.09472	0.01214	0.00752	0.03382	0.0821	0.24518	0.20851	0.09833	0.26654	0.01219	0.03062	0.00113	0.06184	0.09316	0.10556	0.19228	0.04422	0.14828	0.25517	0.06271	0.12435	0.04364	0.0167	0.34331	0.02194	0.17785	0.1159	0.10398	0.08337	0.42101	0.13178	0.05501	0.61877	0.22862	0.2298	0.68032	0.39801	0.20315	0.14167	0.11497	0.16886	0.12939	0.25283	0.00405	0.22889
REACTOME_ANDROGEN_BIOSYNTHESIS	0.21064	0.10582	0.41897	0.04411	0.31243	0.65953	0.9078	0.0997	0.2188	0.09329	0.00203	0.05465	0.1139	0.69432	0.69622	0.9168	0.22426	0.30091	0.54901	0.33551	0.1505	0.28575	0.35645	0.03359	0.05692	0.10968	0.8005	0.76622	0.66596	0.29984	0.09442	0.08251	0.03871	0.32302	0.20327	0.07006	0.78603	0.82462	0.90011	0.60057	0.66289	0.2481	0.11748	0.20966	0.38651	0.91761	0.58103	0.63831	0.18407
REACTOME_PKA_MEDIATED_PHOSPHORYLATION_OF_CREB	0.2112	0.32794	0.12088	0.41084	0.08112	0.28547	0.85372	0.68888	0.40834	0.05005	0.02532	0.06529	0.54853	0.39357	0.64505	0.68682	0.32909	0.8173	0.29285	0.2338	0.8148	0.22292	0.14625	0.43411	0.63831	0.50945	0.12136	0.14896	0.44248	0.52146	0.66511	0.46669	0.75301	0.05255	0.11061	0.47691	0.01123	0.23441	0.74542	0.20744	0.18477	0.08679	0.13039	0.15267	0.09894	0.05339	0.47962	0.82019	0.12437
REACTOME_CASPASE_MEDIATED_CLEAVAGE_OF_CYTOSKELETAL_PROTEINS	0.21347	0.64337	0.45106	0.60675	0.57766	0.39309	0.0828	0.09173	0.27348	0.57812	0.16356	0.59024	0.06603	0.32112	0.23293	0.29581	0.13274	0.66714	0.63043	0.47332	0.7424	0.04836	0.4419	0.03646	0.24973	0.23382	0.31072	0.17693	0.46316	0.19872	0.15006	0.11187	0.08113	0.56552	0.42673	0.39717	0.22216	0.01311	0.0208	0.00852	0.00515	0.42301	0.15684	0.15398	0.39415	0.11774	0.01194	0.10961	0.01546
REACTOME_IL_RECEPTOR_SHC_SIGNALING	0.21359	0.35955	0.61718	0.06059	0.64095	0.54371	0.04842	0.02161	0.19014	0.03523	0.06904	0.02828	0.49968	0.75675	0.35093	0.53998	0.39578	0.69275	0.01415	0.14497	0.11584	0.02638	0.0115	0.08732	0.03696	0.1403	0.2069	0.27196	0.09609	0.11065	0.08748	0.02008	0.16037	0.00375	0.0221	0.00671	0.06857	0.02215	0.0728	0.14492	0.07699	0.00539	0.07126	0.03302	0.06376	0.12701	0.37363	0.09706	0.60882
REACTOME_MEMBRANE_BINDING_AND_TARGETTING_OF_GAG_PROTEINS	0.214065	0.00318	0.00757	0.00785	0.01482	0.00489	0.00278	0.07689	0.00654	0.02812	0.38321	0.06989	0.16744	0.00359	0.00271	0.00295	0.00811	0.01241	0.10781	0.05489	0.05054	0.02679	0.03554	0.0576	0.02208	0.57404	0.62139	0.70133	0.83844	0.06302	0.01234	0.05817	0.02138	0.56877	0.36279	0.63029	0.35312	0.78285	0.33708	0.6944	0.05052	0.64225	0.50679	0.5578	0.7097	0.15054	0.00749	0.49744	0.01462
REACTOME_DNA_REPLICATION	0.21548	0.16875	0.00794	0.08752	0.10081	0.01513	0.02795	0.06094	0.19414	0.20121	0.24653	0.0843	0.31608	0.01452	0.05143	0.00144	0.11285	0.11715	0.13226	0.22064	0.06037	0.25172	0.30592	0.06002	0.1364	0.05526	0.01852	0.36385	0.05272	0.23073	0.18847	0.11359	0.13796	0.29916	0.12615	0.05392	0.63461	0.26228	0.30759	0.76081	0.64145	0.1193	0.08731	0.08256	0.15449	0.1376	0.38506	0.0106	0.38042
REACTOME_CYTOCHROME_P450_ARRANGED_BY_SUBSTRATE_TYPE	0.218025	0.50496	0.18558	0.31186	0.13029	0.22044	0.26654	0.48637	0.11079	0.27478	0.05109	0.48597	0.37077	0.05893	0.08765	0.04623	0.09526	0.42837	0.20744	0.21892	0.04769	0.04655	0.49057	0.3262	0.07837	0.60368	0.43675	0.4381	0.27476	0.02775	0.1431	0.02955	0.09187	0.45333	0.32638	0.41002	0.24157	0.7699	0.62577	0.7638	0.68329	0.43592	0.09401	0.4657	0.25365	0.10545	0.57511	0.19504	0.19828
BIOCARTA_CHEMICAL_PATHWAY	0.218375	0.90868	0.92601	0.87178	0.82584	0.94865	0.93137	0.6709	0.45429	0.71902	0.19898	0.1788	0.55421	0.74286	0.66403	0.85207	0.48369	0.36761	0.1124	0.13712	0.15493	0.49414	0.25403	0.42106	0.28592	0.13227	0.43252	0.02803	0.1794	0.18064	0.18804	0.26307	0.24512	0.2568	0.08192	0.04215	0.30052	0.19547	0.13945	0.02673	0.34421	0.01756	0.0122	0.00125	0.00467	0.57961	0.3202	0.28506	0.23815
KEGG_VALINE_LEUCINE_AND_ISOLEUCINE_BIOSYNTHESIS	0.2198	0.34473	0.4034	0.57658	0.29653	0.10518	0.50042	0.06099	0.23034	0.92208	0.55691	0.64935	0.24413	0.59508	0.02659	0.90676	0.11462	0.00829	0.00644	0.00306	0.00593	0.00276	0.00157	0.10211	0.00474	0.10556	0.3255	0.19413	0.0618	0.0935	0.11722	0.00958	0.25521	0.74104	0.57471	0.63367	0.46845	0.14171	0.52226	0.04056	0.53236	0.50933	0.55863	0.2487	0.44655	0.7503	0.57415	0.00925	0.29119
REACTOME_G_ALPHA1213_SIGNALLING_EVENTS	0.222815	0.01969	0.4007	0.5039	0.06102	0.34559	0.14312	0.64934	0.45633	0.23821	0.14564	0.52082	0.06197	0.20129	0.57781	0.53174	0.46891	0.07294	0.04109	0.04804	0.55698	0.24903	0.03184	0.16917	0.39856	0.30877	0.26752	0.23163	0.43539	0.64171	0.50975	0.43299	0.77659	0.39899	0.24887	0.62181	0.16987	0.38647	0.02481	0.0616	0.12925	0.44003	0.20705	0.52075	0.25005	0.66944	0.22151	0.56398	0.49736
BIOCARTA_WNT_PATHWAY	0.22369	0.12766	0.15404	0.23082	0.05877	0.27565	0.46001	0.25857	0.74493	0.13542	0.63658	0.04094	0.18792	0.1582	0.31532	0.11726	0.46556	0.07841	0.06906	0.06334	0.21032	0.88785	0.4603	0.57602	0.70716	0.57361	0.88881	0.86457	0.98479	0.66965	0.78561	0.57395	0.88397	0.21797	0.09274	0.15274	0.24613	0.10404	0.03601	0.07475	0.4303	0.12542	0.11491	0.01608	0.07686	0.35867	0.10548	0.09932	0.71545
REACTOME_RESOLUTION_OF_AP_SITES_VIA_THE_MULTIPLE_NUCLEOTIDE_PATCH_REPLACEMENT_PATHWAY	0.22402	0.06774	0.27087	0.14256	0.28448	0.15549	0.30954	0.10071	0.54545	0.15013	0.0285	0.20422	0.06934	0.13972	0.78497	0.20136	0.44326	0.03319	0.0239	0.03184	0.05527	0.09152	0.06898	0.23763	0.17432	0.6905	0.40068	0.55212	0.61581	0.05578	0.39591	0.04188	0.34263	0.00589	0.00134	0.00382	0.01669	0.00727	0.437	0.27213	0.3254	0.01718	0.02235	0.10536	0.02596	0.03294	0.12604	0.02646	0.62123
REACTOME_HYALURONAN_METABOLISM	0.224535	0.38546	0.39876	0.23751	0.18259	0.32437	0.11851	0.07073	0.18775	0.07993	0.24698	0.05732	0.75883	0.32205	0.27457	0.69173	0.24475	0.31766	0.08917	0.08483	0.10874	0.22703	0.09549	0.29021	0.06862	0.94135	0.96059	0.86488	0.56814	0.19605	0.10338	0.04064	0.17232	0.00987	0.03047	0.02489	0.07529	0.11491	0.28798	0.74164	0.46593	0.02087	0.23027	0.14724	0.18258	0.76489	0.40612	0.91992	0.39806
REACTOME_GABA_RECEPTOR_ACTIVATION	0.22729	0.03882	0.3682	0.57488	0.01413	0.11652	0.27268	0.45478	0.27482	0.31327	0.20003	0.31695	0.22081	0.10038	0.16109	0.22373	0.13866	0.39276	0.80201	0.7447	0.48725	0.34069	0.08757	0.42987	0.54443	0.08173	0.58966	0.19108	0.29601	0.39983	0.48326	0.8621	0.4862	0.03236	0.11893	0.33332	0.01111	0.09195	0.09278	0.24582	0.16542	0.19044	0.13675	0.35457	0.22164	0.02698	0.13497	0.39446	0.124
REACTOME_SYNTHESIS_SECRETION_AND_INACTIVATION_OF_GIP	0.22873	0.4155	0.26656	0.35247	0.17815	0.16597	0.09176	0.39603	0.02899	0.10647	0.02123	0.04192	0.32925	0.04157	0.03903	0.13897	0.07925	0.51676	0.26756	0.19745	0.05442	0.13596	0.27205	0.52316	0.1719	0.0109	0.03565	0.01991	0.14106	0.02421	0.29651	0.15474	0.12378	0.03041	0.06948	0.02147	0.10775	0.22165	0.28594	0.05165	0.29898	0.00214	0.00109	0.00337	0.00127	0.21159	0.82741	0.89809	0.4719
BIOCARTA_ACH_PATHWAY	0.22907	0.32559	0.65669	0.28039	0.26817	0.82512	0.42824	0.42561	0.25523	0.48119	0.46156	0.37836	0.25487	0.49034	0.3327	0.37549	0.05503	0.31122	0.12503	0.18256	0.36987	0.77926	0.30487	0.22707	0.36611	0.11404	0.46006	0.43059	0.19585	0.40707	0.09531	0.40214	0.10691	0.57922	0.61019	0.54601	0.42129	0.91525	0.17177	0.41439	0.31689	0.51052	0.42895	0.34379	0.57554	0.87376	0.47783	0.92851	0.06187
REACTOME_INTEGRATION_OF_PROVIRUS	0.229225	0.07742	0.08321	0.20299	0.04755	0.02036	0.02868	0.59453	0.097	0.33508	0.67205	0.69862	0.00852	0.04154	0.01211	0.03808	0.05628	0.35673	0.3008	0.24305	0.53788	0.08285	0.29415	0.45737	0.24649	0.00968	0.08325	0.05537	0.07915	0.14683	0.09697	0.36072	0.11151	0.25343	0.51492	0.78349	0.11611	0.32918	0.97297	0.99046	0.1444	0.88313	0.9642	0.99276	0.91823	0.00294	0.00766	0.48916	0.02524
KEGG_GLYCOLYSIS_GLUCONEOGENESIS	0.229455	0.85067	0.63157	0.86783	0.55557	0.06251	0.12682	0.33861	0.15023	0.94354	0.91053	0.95156	0.22389	0.32445	0.02548	0.46503	0.10555	0.44326	0.12868	0.07546	0.10062	0.00485	0.02306	0.67517	0.09111	0.07489	0.10023	0.02077	0.06892	0.16269	0.22967	0.14905	0.38799	0.28297	0.28806	0.20321	0.07594	0.05289	0.79726	0.59366	0.14127	0.50959	0.87785	0.65443	0.51901	0.14107	0.41255	0.10764	0.30529
REACTOME_PHOSPHOLIPASE_C_MEDIATED_CASCADE	0.2303	0.17152	0.29658	0.21706	0.15113	0.58583	0.7868	0.82924	0.54328	0.01319	0.01525	0.00629	0.64827	0.64846	0.86039	0.87355	0.60681	0.65289	0.38502	0.4861	0.46691	0.50836	0.03984	0.21802	0.20065	0.2136	0.36947	0.13341	0.53588	0.56876	0.41178	0.17935	0.56522	0.00284	0.01468	0.04989	0.022	0.20873	0.3026	0.19646	0.65518	0.00243	0.00901	0.01411	0.01164	0.14753	0.5587	0.92802	0.60963
KEGG_GLYCOSPHINGOLIPID_BIOSYNTHESIS_GLOBO_SERIES	0.230435	0.60287	0.22807	0.24643	0.56726	0.12081	0.00318	0.76226	0.06317	0.60917	0.62976	0.28007	0.69047	0.14559	0.03223	0.12982	0.06462	0.22876	0.02277	0.09055	0.14172	0.39307	0.67967	0.85711	0.29306	0.38245	0.10505	0.1219	0.11692	0.18241	0.09152	0.37359	0.14319	0.42417	0.30189	0.15864	0.55031	0.16968	0.06587	0.25841	0.22871	0.23218	0.12113	0.09348	0.11428	0.36096	0.06523	0.54051	0.09558
REACTOME_GABA_B_RECEPTOR_ACTIVATION	0.230845	0.02679	0.46489	0.41421	0.03788	0.1745	0.32493	0.31834	0.26827	0.21902	0.13663	0.23762	0.20274	0.1749	0.251	0.34229	0.18421	0.47811	0.70858	0.74843	0.47212	0.3477	0.05355	0.31379	0.42537	0.09115	0.5191	0.20465	0.28018	0.47018	0.36569	0.81191	0.40016	0.01893	0.10492	0.20784	0.01672	0.05589	0.09115	0.16156	0.12942	0.11277	0.10113	0.26245	0.16193	0.06427	0.21224	0.28334	0.18648
BIOCARTA_CELL2CELL_PATHWAY	0.23507	0.42421	0.48133	0.27954	0.76378	0.34954	0.42847	0.76798	0.63448	0.27615	0.20684	0.16343	0.11905	0.49272	0.6521	0.31821	0.63743	0.01982	0.0515	0.05149	0.3603	0.2851	0.70784	0.97103	0.56258	0.25917	0.22004	0.27192	0.09195	0.19544	0.49157	0.44779	0.57985	0.0123	0.01262	0.01975	0.07265	0.14965	0.83161	0.41566	0.85524	0.01156	0.1293	0.06657	0.03569	0.39261	0.32958	0.36545	0.48926
REACTOME_SIGNALING_BY_FGFR3_MUTANTS	0.23612	0.36348	0.31267	0.62021	0.09826	0.12436	0.03598	0.5742	0.09552	0.67658	0.69367	0.6632	0.42746	0.13135	0.29099	0.23757	0.04038	0.25753	0.81269	0.38657	0.54541	0.55293	0.65882	0.63535	0.73223	0.52548	0.64395	0.66743	0.31605	0.43704	0.66603	0.79934	0.4735	0.74203	0.77283	0.92137	0.57884	0.50733	0.01395	0.16697	0.152	0.67682	0.25938	0.58608	0.24639	0.55296	0.01787	0.49972	0.18918
BIOCARTA_INSULIN_PATHWAY	0.237175	0.21047	0.14137	0.3066	0.12132	0.06596	0.0075	0.0524	0.05573	0.28557	0.60821	0.33395	0.69798	0.1784	0.04539	0.30048	0.14445	0.53809	0.25487	0.1544	0.60743	0.07238	0.10707	0.30729	0.40434	0.26874	0.49631	0.09163	0.34703	0.14932	0.17054	0.2403	0.25369	0.27201	0.12947	0.4357	0.04175	0.12069	0.15407	0.66877	0.05876	0.58272	0.8189	0.5721	0.65825	0.03294	0.06702	0.26242	0.2022
REACTOME_NUCLEAR_RECEPTOR_TRANSCRIPTION_PATHWAY	0.23799	0.88813	0.74996	0.46724	0.69487	0.62951	0.76264	0.25591	0.27066	0.66047	0.42724	0.28893	0.31213	0.37891	0.22865	0.38534	0.12893	0.25344	0.65621	0.1709	0.4471	0.62452	0.90246	0.55367	0.38973	0.16523	0.18054	0.15234	0.28889	0.37233	0.40884	0.67471	0.27359	0.75946	0.36658	0.24583	0.22129	0.39124	0.23493	0.42685	0.11698	0.63065	0.28427	0.34422	0.55726	0.05847	0.23012	0.20025	0.05885
REACTOME_AUTODEGRADATION_OF_CDH1_BY_CDH1_APC_C	0.238565	0.07742	0.00608	0.26107	0.02038	0.02165	0.09503	0.05962	0.12569	0.12887	0.15226	0.10516	0.32891	0.05275	0.23064	0.04055	0.06376	0.34104	0.16291	0.23194	0.23777	0.41267	0.68197	0.10608	0.46052	0.22648	0.01247	0.3568	0.00418	0.37362	0.48964	0.27367	0.11799	0.16349	0.02954	0.23484	0.0517	0.12056	0.36945	0.55386	0.24033	0.29964	0.13614	0.29711	0.14013	0.03762	0.14794	0.0027	0.03951
KEGG_GLYCEROPHOSPHOLIPID_METABOLISM	0.24164	0.15383	0.29791	0.05168	0.82572	0.59852	0.13724	0.80952	0.79418	0.02361	0.07582	0.06364	0.03552	0.89107	0.41183	0.6458	0.8146	0.61627	0.63872	0.44618	0.84291	0.5851	0.13971	0.40609	0.16862	0.02238	0.42023	0.0861	0.40364	0.82206	0.32125	0.29721	0.59829	0.08814	0.13395	0.06883	0.43166	0.25325	0.63387	0.93241	0.49514	0.19263	0.75414	0.48493	0.50126	0.31056	0.07611	0.12675	0.65667
REACTOME_HOST_INTERACTIONS_OF_HIV_FACTORS	0.24208	0.07435	0.0036	0.19947	0.00389	0.02707	0.03086	0.34705	0.34134	0.38108	0.53587	0.35824	0.35365	0.01886	0.08956	0.03256	0.08838	0.25756	0.31162	0.24168	0.36418	0.19368	0.20015	0.23884	0.26512	0.13794	0.05021	0.3778	0.01958	0.36083	0.41721	0.50863	0.25169	0.18854	0.10319	0.55572	0.10079	0.3609	0.46654	0.96769	0.30759	0.49046	0.66462	0.79955	0.27253	0.01165	0.01685	0.00642	0.10154
REACTOME_SIGNALING_BY_THE_B_CELL_RECEPTOR_BCR	0.243145	0.17758	0.00412	0.39874	0.01201	0.02568	0.01427	0.03847	0.04407	0.26863	0.31159	0.24199	0.80154	0.00877	0.03556	0.00206	0.03182	0.12645	0.0464	0.29296	0.04105	0.1831	0.22654	0.08119	0.1901	0.77729	0.20499	0.82347	0.05023	0.08507	0.2443	0.0605	0.10607	0.28772	0.14122	0.19776	0.21571	0.40575	0.65911	0.63974	0.47795	0.21053	0.18444	0.21102	0.07176	0.10909	0.33963	0.03007	0.2263
BIOCARTA_PDGF_PATHWAY	0.24364	0.21386	0.15004	0.37271	0.0934	0.08653	0.00816	0.09238	0.04564	0.25801	0.39931	0.27695	0.72913	0.22363	0.07205	0.4446	0.19118	0.71431	0.52051	0.3753	0.42184	0.13048	0.14085	0.227	0.25512	0.20076	0.22564	0.11376	0.07963	0.12721	0.10761	0.26647	0.20197	0.24396	0.09288	0.45948	0.08469	0.37782	0.25828	0.63922	0.1246	0.45992	0.44794	0.47994	0.43372	0.14387	0.09312	0.51723	0.20361
REACTOME_GAMMA_CARBOXYLATION_TRANSPORT_AND_AMINO_TERMINAL_CLEAVAGE_OF_PROTEINS	0.24456	0.04748	0.07036	0.0392	0.24364	0.32333	0.72751	0.24374	0.71682	0.12051	0.11309	0.28674	0.01891	0.53661	0.66997	0.3223	0.80302	0.31217	0.11284	0.09297	0.52115	0.2734	0.29318	0.10182	0.29875	0.30116	0.14683	0.1158	0.25148	0.43127	0.26958	0.10003	0.3648	0.32283	0.38784	0.50232	0.35141	0.6055	0.96789	0.96535	0.96364	0.82926	0.9251	0.9628	0.83506	0.22049	0.91286	0.3597	0.51288
KEGG_ALDOSTERONE_REGULATED_SODIUM_REABSORPTION	0.24475	0.84334	0.40287	0.25649	0.81517	0.36552	0.12104	0.68523	0.86051	0.22005	0.2029	0.22804	0.21141	0.82837	0.62715	0.35802	0.84428	0.5887	0.07184	0.2716	0.68245	0.33579	0.11729	0.85213	0.82276	0.03758	0.18569	0.04833	0.01009	0.66524	0.86641	0.61648	0.88282	0.04343	0.06781	0.05965	0.03709	0.03368	0.06535	0.40688	0.27443	0.25109	0.65565	0.43926	0.64842	0.08125	0.41898	0.08765	0.6346
REACTOME_ORC1_REMOVAL_FROM_CHROMATIN	0.24475	0.08563	0.00225	0.38496	0.00281	0.0115	0.01691	0.08105	0.06034	0.27136	0.33815	0.34517	0.2568	0.00471	0.01645	0.0031	0.01887	0.44885	0.46806	0.64183	0.13129	0.34086	0.59562	0.10929	0.43548	0.24444	0.04866	0.44757	0.01853	0.38683	0.41786	0.3843	0.10795	0.36325	0.27885	0.44671	0.28439	0.44719	0.73191	0.88275	0.60857	0.38605	0.35221	0.40197	0.31792	0.06894	0.12378	0.00856	0.05043
BIOCARTA_HDAC_PATHWAY	0.245515	0.64133	0.74999	0.68787	0.34902	0.57034	0.06268	0.57495	0.18542	0.63097	0.66311	0.6372	0.52025	0.32033	0.06783	0.26661	0.12103	0.31934	0.29715	0.55367	0.55644	0.14171	0.10941	0.69131	0.62366	0.32159	0.348	0.26482	0.74999	0.36759	0.28006	0.47756	0.71606	0.12233	0.10364	0.11854	0.05729	0.22083	0.11203	0.30388	0.23325	0.12424	0.2159	0.26197	0.21191	0.12204	0.28207	0.40198	0.40229
REACTOME_AQUAPORIN_MEDIATED_TRANSPORT	0.24649	0.09443	0.4853	0.62455	0.07288	0.4157	0.84506	0.97275	0.5306	0.14631	0.04586	0.1253	0.50056	0.14927	0.59769	0.71448	0.27523	0.27456	0.36089	0.37097	0.4598	0.35099	0.21249	0.49566	0.61612	0.01928	0.10586	0.0129	0.19695	0.43483	0.7069	0.79486	0.63459	0.16588	0.33171	0.33913	0.07755	0.15049	0.27564	0.0183	0.50561	0.06772	0.02958	0.0335	0.03035	0.14951	0.59002	0.64754	0.33843
REACTOME_SIGNALLING_TO_ERKS	0.246795	0.17803	0.08858	0.25907	0.43267	0.29038	0.02391	0.02572	0.03664	0.11183	0.27159	0.27706	0.1516	0.68608	0.18978	0.60793	0.48956	0.07461	0.15405	0.24233	0.11569	0.13538	0.04221	0.01508	0.04566	0.11909	0.57914	0.44695	0.32936	0.05637	0.02539	0.04189	0.03589	0.17598	0.05623	0.42086	0.09821	0.06652	0.04527	0.13965	0.01239	0.09921	0.20507	0.32426	0.07083	0.39183	0.06451	0.60879	0.15138
REACTOME_FGFR2C_LIGAND_BINDING_AND_ACTIVATION	0.24716	0.25297	0.31965	0.34034	0.08058	0.20701	0.06066	0.57443	0.08865	0.32573	0.29886	0.34957	0.14493	0.15756	0.27245	0.34538	0.04096	0.39161	0.86321	0.40969	0.55317	0.46912	0.62625	0.4603	0.46494	0.42339	0.72687	0.63763	0.41604	0.46461	0.49406	0.70463	0.34822	0.70346	0.75776	0.85459	0.58974	0.52374	0.03452	0.33772	0.16618	0.60318	0.45292	0.54846	0.44797	0.61626	0.02415	0.42844	0.16572
REACTOME_CD28_DEPENDENT_VAV1_PATHWAY	0.24872	0.61259	0.7623	0.4883	0.44573	0.66646	0.13768	0.16845	0.25934	0.24234	0.14342	0.12975	0.14214	0.47613	0.20701	0.35904	0.44002	0.78031	0.06637	0.14302	0.18866	0.25627	0.09992	0.14183	0.07832	0.1838	0.27214	0.27115	0.13455	0.22176	0.11949	0.1709	0.19691	0.03152	0.03111	0.05855	0.04039	0.0133	0.56382	0.31497	0.04822	0.02422	0.11851	0.19858	0.06332	0.06359	0.03681	0.06188	0.22755
BIOCARTA_IGF1MTOR_PATHWAY	0.24984	0.58532	0.39807	0.88905	0.0706	0.49524	0.07758	0.40702	0.18055	0.47028	0.42627	0.35582	0.31243	0.26425	0.16175	0.50304	0.11442	0.56603	0.08611	0.0856	0.31598	0.36318	0.26415	0.75179	0.75622	0.63768	0.16555	0.31511	0.28526	0.64929	0.39903	0.37025	0.72993	0.4127	0.10135	0.50767	0.26214	0.33809	0.01554	0.19478	0.14156	0.25255	0.1662	0.12174	0.14596	0.52103	0.14193	0.29834	0.26372
REACTOME_PHASE1_FUNCTIONALIZATION_OF_COMPOUNDS	0.250915	0.72738	0.30957	0.38718	0.36128	0.34427	0.39548	0.7363	0.13357	0.52187	0.1491	0.74546	0.54079	0.14016	0.11562	0.11532	0.08966	0.5236	0.26918	0.21332	0.09731	0.08329	0.55945	0.39513	0.10395	0.75241	0.43874	0.60233	0.38842	0.06498	0.15678	0.05734	0.09994	0.62513	0.43449	0.49545	0.28303	0.71593	0.70254	0.7721	0.44632	0.63639	0.19121	0.63756	0.36903	0.17875	0.4263	0.2316	0.11302
REACTOME_CLASS_B_2_SECRETIN_FAMILY_RECEPTORS	0.2518	0.00715	0.06706	0.02545	0.01167	0.0155	0.31056	0.12969	0.06311	0.24373	0.78585	0.31141	0.50567	0.02329	0.2441	0.04684	0.05604	0.00235	0.3087	0.27306	0.02828	0.4673	0.21114	0.26143	0.20016	0.08802	0.73452	0.39675	0.71894	0.092	0.48147	0.52575	0.19773	0.10404	0.20451	0.11336	0.12639	0.18866	0.03968	0.05052	0.37995	0.50584	0.05491	0.19517	0.5059	0.06081	0.25715	0.25215	0.36535
REACTOME_BASE_EXCISION_REPAIR	0.252245	0.11188	0.34302	0.21235	0.32804	0.2281	0.39384	0.11216	0.54019	0.21574	0.04239	0.2582	0.07653	0.20299	0.81182	0.29601	0.42465	0.04899	0.02203	0.03544	0.06548	0.14991	0.11325	0.3312	0.24613	0.78389	0.37591	0.67381	0.41734	0.09043	0.45768	0.06269	0.43855	0.00984	0.00132	0.00283	0.02024	0.00274	0.49681	0.36388	0.39136	0.02182	0.03397	0.12123	0.03576	0.04841	0.13483	0.02004	0.70903
KEGG_ARACHIDONIC_ACID_METABOLISM	0.25355	0.48177	0.06963	0.35807	0.15189	0.05603	0.2775	0.99396	0.45358	0.25384	0.40882	0.60524	0.38535	0.11788	0.11103	0.19005	0.38307	0.66608	0.97626	0.75826	0.84404	0.51144	0.77284	0.74553	0.90823	0.3315	0.54462	0.22886	0.25801	0.47561	0.86652	0.84077	0.89519	0.34456	0.1376	0.30779	0.22398	0.26005	0.45226	0.24836	0.40267	0.50347	0.46175	0.519	0.47875	0.03647	0.13047	0.22538	0.49678
REACTOME_NUCLEOTIDE_BINDING_DOMAIN_LEUCINE_RICH_REPEAT_CONTAINING_RECEPTOR_NLR_SIGNALING_PATHWAYS	0.25378	0.11647	0.64357	0.09345	0.80166	0.90321	0.01024	0.00258	0.00781	0.13222	0.10632	0.12746	0.32586	0.74355	0.00317	0.66559	0.00528	0.90991	0.28301	0.52914	0.00422	0.00352	0.00058	0.00341	0.00343	0.12446	0.08391	0.24455	0.15104	0.00588	0.00312	0.00513	0.00504	0.87696	0.835	0.3869	0.20543	0.75365	0.02376	0.000364	0.00205	0.44746	0.24446	0.29224	0.12887	0.38004	0.00204	0.36044	0.00345
KEGG_PROSTATE_CANCER	0.25628	0.14127	0.2831	0.48485	0.04724	0.28955	0.27158	0.1135	0.45521	0.1965	0.40781	0.55291	0.30739	0.13134	0.51566	0.05366	0.48384	0.0753	0.10227	0.15543	0.56155	0.42907	0.14018	0.46335	0.84147	0.95647	0.93407	0.95765	0.80726	0.5488	0.83554	0.35907	0.95926	0.01806	0.00907	0.09181	0.00815	0.01809	0.00652	0.01221	0.01641	0.13447	0.20419	0.3596	0.26965	0.09855	0.10771	0.12645	0.40814
KEGG_PANTOTHENATE_AND_COA_BIOSYNTHESIS	0.25788	0.56612	0.22752	0.57775	0.32041	0.03154	0.24663	0.10867	0.02233	0.5345	0.13662	0.39121	0.42317	0.05538	0.05221	0.09484	0.07051	0.37294	0.65615	0.7238	0.10657	0.13274	0.45716	0.46462	0.13538	0.42801	0.34355	0.08468	0.33575	0.04794	0.13008	0.21897	0.04812	0.18695	0.11635	0.17082	0.13876	0.01496	0.23002	0.00597	0.04618	0.10224	0.01897	0.05271	0.02303	0.03228	0.21252	0.08864	0.0789
REACTOME_G_ALPHA_S_SIGNALLING_EVENTS	0.259055	0.00866	0.30814	0.06231	0.0878	0.2675	0.68987	0.21539	0.49853	0.14203	0.53185	0.84684	0.03436	0.22095	0.52581	0.25858	0.21933	0.01957	0.52355	0.19931	0.55798	0.38785	0.09639	0.56956	0.76125	0.000483	0.1552	0.01365	0.02785	0.5244	0.85596	0.82187	0.73847	0.15544	0.46832	0.54753	0.15385	0.74017	0.50875	0.379	0.62297	0.64911	0.47334	0.84153	0.42359	0.29627	0.6805	0.51403	0.43978
KEGG_ADHERENS_JUNCTION	0.26	0.2956	0.45579	0.66232	0.31045	0.13851	0.03893	0.18158	0.16806	0.66251	0.69692	0.70109	0.07056	0.13691	0.2301	0.04976	0.31467	0.00972	0.03901	0.15046	0.13539	0.16341	0.76733	0.59255	0.4586	0.28049	0.62025	0.19835	0.18788	0.09232	0.28052	0.25759	0.38804	0.2913	0.53256	0.32204	0.29378	0.14778	0.4779	0.12881	0.23569	0.26049	0.30028	0.14201	0.21226	0.07921	0.06606	0.05234	0.42984
REACTOME_HOMOLOGOUS_RECOMBINATION_REPAIR_OF_REPLICATION_INDEPENDENT_DOUBLE_STRAND_BREAKS	0.26158	0.58085	0.71741	0.55413	0.32515	0.71393	0.81185	0.05296	0.13184	0.35776	0.29294	0.3014	0.92335	0.60145	0.2999	0.88429	0.06731	0.14105	0.0012	0.000454	0.03835	0.55747	0.14527	0.03229	0.04833	0.8002	0.44619	0.87788	0.70729	0.20572	0.03322	0.00743	0.01939	0.10965	0.05978	0.15179	0.06	0.17361	0.28373	0.42895	0.12918	0.16733	0.19929	0.18613	0.16325	0.07985	0.17224	0.49143	0.01513
REACTOME_INCRETIN_SYNTHESIS_SECRETION_AND_INACTIVATION	0.263075	0.41007	0.45372	0.62462	0.09599	0.09033	0.21361	0.65174	0.04376	0.29749	0.11701	0.12311	0.3069	0.0134	0.08912	0.15805	0.0568	0.50386	0.61485	0.52259	0.12118	0.29356	0.31715	0.62271	0.47355	0.07184	0.11786	0.05757	0.43919	0.03398	0.67848	0.4216	0.34948	0.03081	0.04203	0.00758	0.09373	0.12446	0.15738	0.00534	0.51532	0.00124	0.000306	0.000328	0.00064	0.16015	0.96593	0.53154	0.71909
REACTOME_NCAM_SIGNALING_FOR_NEURITE_OUT_GROWTH	0.26325	0.69244	0.88596	0.75515	0.77577	0.68771	0.16987	0.05144	0.28326	0.72441	0.17646	0.28468	0.30623	0.81737	0.48443	0.96516	0.57307	0.54472	0.6671	0.53325	0.42469	0.03187	0.21357	0.08341	0.09569	0.15805	0.41217	0.21339	0.29633	0.08379	0.10755	0.06595	0.14115	0.36702	0.44789	0.41594	0.56804	0.0879	0.47191	0.57596	0.13474	0.23888	0.15314	0.29066	0.12841	0.41964	0.42783	0.63413	0.41193
REACTOME_FGFR_LIGAND_BINDING_AND_ACTIVATION	0.26365	0.15365	0.26385	0.22896	0.20717	0.45185	0.24554	0.69478	0.52432	0.08825	0.07743	0.04263	0.41257	0.51389	0.8077	0.60684	0.50684	0.16837	0.36758	0.31206	0.29176	0.55538	0.06235	0.36593	0.26345	0.74964	0.68088	0.69139	0.74922	0.50415	0.5854	0.17796	0.64528	0.142	0.13799	0.36218	0.38722	0.41147	0.03399	0.12854	0.60337	0.09515	0.03821	0.12686	0.08098	0.69086	0.15033	0.78252	0.7221
KEGG_FRUCTOSE_AND_MANNOSE_METABOLISM	0.264895	0.17716	0.41053	0.17333	0.5221	0.63607	0.72806	0.2742	0.42491	0.14107	0.34802	0.19519	0.01179	0.55996	0.50971	0.45836	0.40641	0.56111	0.50464	0.08461	0.58248	0.83966	0.9003	0.55768	0.52082	0.06041	0.02082	0.03606	0.06808	0.26581	0.45116	0.59144	0.29383	0.3218	0.34372	0.3574	0.10575	0.64343	0.90397	0.83629	0.49387	0.57073	0.88974	0.57795	0.50316	0.18597	0.63966	0.65484	0.26376
KEGG_GALACTOSE_METABOLISM	0.2654	0.78224	0.90063	0.75888	0.82681	0.76409	0.25442	0.50236	0.69914	0.78007	0.76405	0.54417	0.04172	0.38916	0.50576	0.18177	0.76121	0.47555	0.43999	0.50991	0.64824	0.1709	0.39234	0.72593	0.75761	0.07675	0.04829	0.08384	0.03756	0.30167	0.80697	0.52406	0.87538	0.18819	0.33808	0.19515	0.26538	0.06565	0.03079	0.03402	0.23053	0.21002	0.2687	0.23366	0.27298	0.23325	0.53773	0.35464	0.88753
BIOCARTA_CTLA4_PATHWAY	0.265585	0.9137	0.92987	0.73272	0.83267	0.86321	0.09028	0.11307	0.59042	0.55252	0.38909	0.44576	0.43051	0.72149	0.37101	0.62448	0.47718	0.71608	0.17215	0.12049	0.3958	0.12436	0.07471	0.36095	0.2951	0.42739	0.58513	0.824	0.40152	0.40632	0.20895	0.13338	0.44521	0.30371	0.18443	0.49938	0.15717	0.22195	0.0303	0.31421	0.15597	0.26298	0.23439	0.41852	0.2405	0.43307	0.10345	0.32426	0.273
REACTOME_PRE_NOTCH_EXPRESSION_AND_PROCESSING	0.266225	0.04702	0.31179	0.04344	0.32123	0.70931	0.94554	0.32394	0.26482	0.02537	0.00978	0.0306	0.28911	0.49806	0.20326	0.82612	0.0509	0.10633	0.17194	0.09389	0.12314	0.35109	0.42794	0.559	0.18547	0.20785	0.90977	0.3624	0.31983	0.27262	0.15051	0.12859	0.11291	0.06156	0.0481	0.06348	0.16581	0.68533	0.45227	0.45918	0.6038	0.01891	0.02425	0.08921	0.02402	0.88562	0.38494	0.78684	0.16369
REACTOME_FACTORS_INVOLVED_IN_MEGAKARYOCYTE_DEVELOPMENT_AND_PLATELET_PRODUCTION	0.268455	0.33003	0.42444	0.60825	0.3438	0.29041	0.7092	0.03245	0.03296	0.51016	0.3672	0.19518	0.22045	0.06311	0.11539	0.15526	0.08067	0.01998	0.13371	0.18889	0.03935	0.59273	0.65808	0.0715	0.09381	0.81519	0.35054	0.09088	0.7365	0.0378	0.04892	0.07048	0.03218	0.45284	0.25216	0.1314	0.26663	0.46177	0.64594	0.10201	0.31117	0.16964	0.0386	0.0567	0.1098	0.26159	0.44901	0.8509	0.11138
REACTOME_CELL_CELL_COMMUNICATION	0.268745	0.29344	0.3628	0.2328	0.64515	0.48456	0.25651	0.40394	0.58733	0.42413	0.16038	0.26719	0.24811	0.76115	0.29941	0.36957	0.45296	0.44186	0.5568	0.68704	0.37424	0.13803	0.42511	0.22565	0.18825	0.09315	0.13268	0.05204	0.13653	0.18104	0.1198	0.17367	0.18276	0.08947	0.35621	0.24774	0.2703	0.40473	0.71388	0.24527	0.3905	0.19944	0.30065	0.18631	0.1269	0.15289	0.26203	0.40137	0.21757
REACTOME_HIV_INFECTION	0.26939	0.04708	0.00438	0.1586	0.01272	0.0169	0.04233	0.57514	0.56313	0.38062	0.44129	0.63811	0.27183	0.01126	0.1264	0.01162	0.18376	0.05407	0.25955	0.20043	0.40226	0.18551	0.11429	0.38985	0.44457	0.31629	0.1691	0.7256	0.09734	0.33592	0.57782	0.52371	0.39913	0.18347	0.12772	0.70473	0.17406	0.69335	0.44311	0.94635	0.50371	0.58058	0.65662	0.92895	0.28338	0.04078	0.01395	0.06012	0.14722
REACTOME_APOBEC3G_MEDIATED_RESISTANCE_TO_HIV1_INFECTION	0.269515	0.15698	0.1024	0.37974	0.05789	0.0173	0.00773	0.59913	0.03149	0.64248	0.89267	0.80683	0.04665	0.03096	0.00429	0.04244	0.02184	0.40268	0.72232	0.31972	0.48581	0.02606	0.47649	0.65594	0.1739	0.00369	0.06664	0.03541	0.08977	0.05196	0.11195	0.55031	0.06453	0.6419	0.64011	0.96522	0.11703	0.2062	0.89692	0.98868	0.05891	0.99515	0.98645	0.99818	0.97435	0.00247	0.00251	0.31305	0.01073
KEGG_PATHOGENIC_ESCHERICHIA_COLI_INFECTION	0.269685	0.59265	0.61794	0.69899	0.34204	0.5454	0.33556	0.85176	0.25327	0.42527	0.0765	0.26645	0.48343	0.31441	0.16714	0.19393	0.1553	0.50036	0.1613	0.31481	0.07835	0.56919	0.35582	0.28082	0.23445	0.7528	0.56086	0.11734	0.35496	0.23012	0.0883	0.24284	0.11877	0.23681	0.19265	0.22409	0.2696	0.1671	0.12275	0.08076	0.42524	0.17548	0.04201	0.08803	0.15295	0.18843	0.19674	0.09624	0.31943
KEGG_FC_GAMMA_R_MEDIATED_PHAGOCYTOSIS	0.269765	0.41123	0.4741	0.17409	0.64379	0.63448	0.46432	0.39912	0.74367	0.24553	0.15362	0.3307	0.32007	0.39545	0.84986	0.16063	0.86692	0.51485	0.10119	0.33745	0.21992	0.14575	0.02858	0.02413	0.08841	0.19127	0.13879	0.17881	0.02838	0.38705	0.39674	0.05114	0.38843	0.17338	0.16257	0.15944	0.5074	0.08033	0.073	0.07436	0.12728	0.16891	0.09812	0.28594	0.28091	0.35444	0.52766	0.09615	0.89933
REACTOME_MITOTIC_PROMETAPHASE	0.270775	0.26668	0.1694	0.04622	0.67063	0.0918	0.09353	0.31272	0.41133	0.15561	0.1003	0.05981	0.2748	0.22846	0.25781	0.04728	0.55867	0.1154	0.38774	0.32372	0.14979	0.20483	0.26503	0.1515	0.11349	0.01639	0.01652	0.03719	0.06063	0.14018	0.11716	0.1461	0.22634	0.31081	0.42042	0.0998	0.7605	0.26496	0.31174	0.44149	0.34094	0.13839	0.14524	0.12746	0.08639	0.36069	0.72649	0.36991	0.65173
REACTOME_NEPHRIN_INTERACTIONS	0.27166	0.80252	0.29749	0.47623	0.52356	0.11611	0.07819	0.6196	0.50393	0.58852	0.28991	0.64515	0.43898	0.41673	0.37319	0.07268	0.86217	0.03682	0.0634	0.15515	0.24461	0.05495	0.20361	0.56646	0.57576	0.59083	0.88761	0.7268	0.67833	0.04736	0.53498	0.06992	0.73794	0.06	0.28249	0.54928	0.19028	0.24833	0.0514	0.21339	0.2276	0.40058	0.3307	0.5511	0.24736	0.04432	0.12169	0.37398	0.44757
KEGG_ALPHA_LINOLENIC_ACID_METABOLISM	0.272025	0.51441	0.37506	0.3877	0.63271	0.36381	0.3829	0.96469	0.67232	0.68688	0.45287	0.44044	0.03956	0.14704	0.59823	0.31116	0.38901	0.10256	0.53712	0.25737	0.31722	0.42518	0.56794	0.76794	0.59706	0.19392	0.4364	0.5437	0.06475	0.2898	0.79061	0.52648	0.62819	0.71334	0.07456	0.05257	0.78975	0.22571	0.66656	0.19129	0.27284	0.17011	0.21799	0.22148	0.17263	0.88076	0.20659	0.24783	0.85057
REACTOME_PRE_NOTCH_TRANSCRIPTION_AND_TRANSLATION	0.27236	0.02182	0.20104	0.01388	0.17346	0.575	0.9524	0.17969	0.27054	0.02923	0.00884	0.02445	0.23188	0.42167	0.20303	0.74273	0.02055	0.04514	0.22308	0.05196	0.09836	0.75096	0.69753	0.69031	0.23289	0.59791	0.99558	0.71061	0.69968	0.54368	0.17486	0.42367	0.12182	0.14533	0.07186	0.07768	0.0822	0.6813	0.34965	0.68703	0.47589	0.07595	0.07662	0.12006	0.06754	0.77754	0.15933	0.42394	0.05631
REACTOME_SCFSKP2_MEDIATED_DEGRADATION_OF_P27_P21	0.273505	0.06344	0.00701	0.21848	0.01391	0.08412	0.28098	0.06464	0.34367	0.13587	0.30767	0.11873	0.3505	0.06094	0.40679	0.05031	0.06668	0.38409	0.20342	0.27305	0.3559	0.55507	0.39117	0.06004	0.47029	0.67939	0.04431	0.62424	0.00718	0.72418	0.60832	0.27263	0.19262	0.17194	0.12425	0.43904	0.07966	0.28056	0.64027	0.74616	0.29734	0.34328	0.4542	0.47081	0.32871	0.05711	0.23861	0.0049	0.05
BIOCARTA_AHSP_PATHWAY	0.27353	0.03879	0.00187	0.02796	0.00615	0.00639	0.02938	0.46609	0.03942	0.04501	0.05919	0.07346	0.10065	0.00894	0.03484	0.0202	0.0809	0.74955	0.6278	0.91328	0.13745	0.04247	0.08827	0.07409	0.10808	0.47148	0.78329	0.40109	0.65477	0.09917	0.09961	0.2434	0.11885	0.29953	0.64058	0.42689	0.34214	0.75962	0.9142	0.24464	0.8632	0.36605	0.69062	0.38738	0.45625	0.04464	0.85982	0.73907	0.42103
KEGG_RIBOFLAVIN_METABOLISM	0.27436	0.04279	0.61774	0.13927	0.38161	0.76696	0.44335	0.7853	0.4863	0.06563	0.18817	0.18788	0.0103	0.64592	0.67927	0.57541	0.69216	0.11126	0.16791	0.06282	0.17333	0.56598	0.52343	0.52838	0.27041	0.6263	0.76358	0.86127	0.80967	0.37654	0.35354	0.05961	0.4111	0.40401	0.28208	0.51673	0.20233	0.34104	0.26464	0.43074	0.12285	0.31306	0.40494	0.52027	0.40658	0.42032	0.05458	0.4787	0.30323
REACTOME_GAP_JUNCTION_DEGRADATION	0.274605	0.74152	0.5056	0.85917	0.17752	0.7445	0.66632	0.84353	0.55656	0.83874	0.59736	0.68914	0.51631	0.48769	0.48211	0.76126	0.20423	0.4094	0.10004	0.02312	0.53122	0.28728	0.33651	0.40315	0.52797	0.77106	0.94954	0.9137	0.90087	0.8145	0.77882	0.43183	0.47736	0.29783	0.14172	0.42264	0.08243	0.35476	0.19406	0.83365	0.14413	0.17934	0.30399	0.19794	0.18486	0.51313	0.05205	0.43399	0.22708
REACTOME_P2Y_RECEPTORS	0.275425	0.53288	0.94909	0.95477	0.19967	0.80099	0.16613	0.60447	0.10387	0.67282	0.96817	0.98658	0.68127	0.4438	0.25131	0.72964	0.03011	0.46518	0.07139	0.01914	0.38439	0.09937	0.0223	0.32759	0.0983	0.95303	0.60791	0.61762	0.82273	0.52083	0.1456	0.28472	0.15994	0.369	0.39695	0.8022	0.0588	0.48899	0.09855	0.56341	0.0935	0.67672	0.62813	0.86545	0.41886	0.52447	0.31585	0.50203	0.03057
REACTOME_STRIATED_MUSCLE_CONTRACTION	0.27579	0.36025	0.3086	0.46284	0.20295	0.42567	0.50985	0.42351	0.76486	0.29011	0.38409	0.39974	0.35032	0.56269	0.75493	0.43288	0.68386	0.07232	0.11644	0.02882	0.38913	0.47603	0.52392	0.35133	0.64119	0.22081	0.29149	0.2468	0.10971	0.35377	0.7448	0.20426	0.75263	0.01324	0.01198	0.209	0.00847	0.01964	0.18153	0.47219	0.02674	0.08538	0.24998	0.45634	0.19133	0.04166	0.01865	0.31996	0.1777
REACTOME_SIGNALING_BY_FGFR_MUTANTS	0.276165	0.56738	0.15922	0.57612	0.40342	0.29202	0.006	0.13583	0.13415	0.61752	0.41525	0.51746	0.51864	0.5905	0.17066	0.55674	0.33558	0.84572	0.6389	0.4819	0.86846	0.26968	0.055	0.30095	0.43865	0.41092	0.25383	0.28981	0.19683	0.50594	0.29381	0.47121	0.60871	0.5173	0.49284	0.92077	0.17276	0.19148	0.00577	0.41858	0.04247	0.56821	0.50028	0.72684	0.44045	0.0696	0.01681	0.51505	0.24801
REACTOME_DOWNSTREAM_SIGNALING_OF_ACTIVATED_FGFR	0.27885	0.70221	0.64339	0.54198	0.60653	0.84812	0.55711	0.24654	0.43364	0.09781	0.03644	0.02636	0.82642	0.89614	0.76932	0.96753	0.60209	0.81638	0.51633	0.67009	0.46321	0.18329	0.01957	0.12744	0.11803	0.59764	0.63366	0.45983	0.66717	0.27195	0.2679	0.10507	0.36717	0.02165	0.028	0.08153	0.03142	0.27509	0.09086	0.27659	0.34339	0.00811	0.02129	0.03968	0.01865	0.52706	0.76362	0.95629	0.62438
BIOCARTA_TCRA_PATHWAY	0.278975	0.41564	0.45471	0.72293	0.2757	0.52697	0.01809	0.07506	0.18886	0.66895	0.40893	0.81486	0.10009	0.29359	0.18808	0.67859	0.29643	0.58847	0.3435	0.15101	0.40612	0.17729	0.12455	0.05725	0.186	0.34596	0.5139	0.36291	0.29754	0.26743	0.08776	0.23303	0.23523	0.62152	0.32272	0.75407	0.32713	0.26847	0.01402	0.06664	0.02574	0.68851	0.44142	0.68069	0.4816	0.17422	0.00607	0.05666	0.11466
REACTOME_REGULATION_OF_INSULIN_SECRETION	0.279195	0.03138	0.2452	0.36218	0.04064	0.14514	0.35611	0.88309	0.30874	0.0566	0.03436	0.01685	0.5468	0.03894	0.3379	0.36071	0.40699	0.37147	0.50334	0.52749	0.19697	0.38568	0.16119	0.17192	0.20561	0.03852	0.4063	0.05773	0.43657	0.11104	0.45439	0.28647	0.34594	0.00214	0.01237	0.00305	0.03559	0.04314	0.23617	0.01984	0.58151	5.3e-05	0.000385	0.00067	0.00054	0.15846	0.90713	0.58756	0.77512
REACTOME_REGULATION_OF_MITOTIC_CELL_CYCLE	0.2801	0.07167	0.00082	0.37745	0.00175	0.00819	0.04055	0.1074	0.06686	0.26656	0.44691	0.27546	0.53293	0.00428	0.03816	0.01221	0.02703	0.51181	0.1698	0.41632	0.176	0.31037	0.60012	0.14993	0.42197	0.56395	0.03729	0.19726	0.01819	0.25665	0.39659	0.36616	0.13164	0.31659	0.12366	0.37227	0.13017	0.3247	0.59411	0.65793	0.51643	0.41659	0.21977	0.34841	0.24458	0.028	0.17427	0.0232	0.05112
KEGG_GLYCINE_SERINE_AND_THREONINE_METABOLISM	0.280365	0.21376	0.15184	0.2897	0.13217	0.02045	0.10039	0.28477	0.4828	0.5703	0.56452	0.78886	0.73233	0.10872	0.60623	0.02734	0.75402	0.00683	0.72557	0.15649	0.83197	0.75342	0.51871	0.48151	0.9558	0.50671	0.30514	0.76592	0.61699	0.56154	0.84176	0.96672	0.95386	0.18756	0.16636	0.69587	0.05363	0.07442	0.00554	0.01077	0.01579	0.36945	0.0687	0.34902	0.12464	0.02016	0.01291	0.08877	0.31897
REACTOME_METABOLISM_OF_VITAMINS_AND_COFACTORS	0.281755	0.21211	0.4721	0.36641	0.20479	0.44345	0.23348	0.18419	0.07191	0.36538	0.59289	0.50281	0.0814	0.29176	0.16588	0.59573	0.12845	0.62655	0.17331	0.20873	0.3281	0.18671	0.53998	0.55543	0.19452	0.0124	0.42895	0.01461	0.32121	0.14458	0.06723	0.18174	0.20227	0.11444	0.15909	0.183	0.2067	0.38357	0.89262	0.73538	0.47495	0.26709	0.58855	0.60419	0.46899	0.28382	0.25267	0.80584	0.45263
BIOCARTA_INFLAM_PATHWAY	0.281905	0.69487	0.01842	0.02013	0.51123	0.23857	0.0423	0.17355	0.70061	0.28553	0.0808	0.07625	0.46036	0.61908	0.54078	0.06439	0.21319	0.69213	0.56993	0.29382	0.77192	0.06165	0.57503	0.03274	0.17474	0.0838	0.01873	0.23009	0.00422	0.62114	0.38387	0.58385	0.02778	0.36405	0.1027	0.18244	0.1951	0.25412	0.25443	0.67793	0.31846	0.31766	0.61245	0.58413	0.50121	0.17049	0.05596	0.00575	0.01964
REACTOME_DEGRADATION_OF_THE_EXTRACELLULAR_MATRIX	0.28191	0.29945	0.09744	0.27263	0.13073	0.12597	0.32461	0.16697	0.56735	0.1158	0.22603	0.40029	0.83611	0.09465	0.1923	0.14896	0.14167	0.46883	0.01871	0.00597	0.51875	0.49445	0.53774	0.52159	0.44863	0.3554	0.55043	0.09656	0.78314	0.64425	0.68747	0.20986	0.56327	0.1529	0.11745	0.32269	0.14038	0.77716	0.87989	0.82607	0.79931	0.49805	0.61346	0.65845	0.76288	0.15771	0.18015	0.90715	0.12503
REACTOME_TRANSLATION	0.282485	0.23778	0.05367	0.55579	0.02061	0.14417	0.33593	0.42345	0.10759	0.24278	0.22308	0.11601	0.95349	0.07878	0.25318	0.4105	0.08418	0.50816	0.20405	0.31711	0.05162	0.50469	0.35401	0.13134	0.13474	0.52259	0.03293	0.16159	0.25127	0.19634	0.17373	0.07712	0.10425	0.08932	0.01652	0.09853	0.25729	0.22753	0.22139	0.29286	0.56682	0.0831	0.02684	0.05429	0.0495	0.16689	0.46441	0.15618	0.4136
REACTOME_ADAPTIVE_IMMUNE_SYSTEM	0.28259	0.27276	0.01281	0.38652	0.06301	0.03991	0.05231	0.45509	0.20924	0.24784	0.27243	0.20696	0.61609	0.08774	0.15626	0.11653	0.18637	0.47274	0.30966	0.52743	0.27441	0.56432	0.43044	0.16408	0.6508	0.61238	0.11997	0.40799	0.11966	0.34228	0.45804	0.44748	0.35562	0.12697	0.08562	0.27157	0.1401	0.09438	0.25989	0.23614	0.30547	0.24225	0.34052	0.28893	0.09311	0.05218	0.15123	0.0286	0.36801
REACTOME_APOPTOTIC_CLEAVAGE_OF_CELLULAR_PROTEINS	0.2833	0.45698	0.37842	0.32853	0.78751	0.45303	0.38869	0.66274	0.71169	0.46913	0.17195	0.65383	0.07251	0.49415	0.56235	0.43519	0.53176	0.59649	0.9131	0.58137	0.97743	0.27065	0.66329	0.24505	0.73578	0.40029	0.42568	0.31443	0.80752	0.58469	0.64141	0.70886	0.47788	0.47931	0.34122	0.3894	0.2633	0.0172	0.01382	0.02529	0.0214	0.43127	0.14627	0.2398	0.31716	0.13757	0.01968	0.11383	0.06134
KEGG_BASE_EXCISION_REPAIR	0.28355	0.18563	0.68258	0.55925	0.49225	0.56455	0.47319	0.2484	0.3252	0.55166	0.19245	0.58856	0.36483	0.25527	0.54124	0.40217	0.30744	0.24608	0.21649	0.33841	0.10888	0.08237	0.16147	0.38309	0.20617	0.62811	0.57252	0.20651	0.58771	0.0838	0.28935	0.15048	0.27507	0.05914	0.01624	0.00628	0.17114	0.04401	0.57646	0.18938	0.62533	0.01436	0.03292	0.03336	0.00683	0.37193	0.49994	0.06517	0.89427
REACTOME_CD28_CO_STIMULATION	0.28359	0.54376	0.79607	0.29893	0.59074	0.90483	0.33907	0.56996	0.83884	0.12858	0.02389	0.05768	0.30284	0.76308	0.61819	0.59825	0.89574	0.80593	0.26895	0.50465	0.46254	0.37163	0.05289	0.23196	0.27934	0.36138	0.16066	0.539	0.17171	0.58784	0.31255	0.22256	0.66121	0.01537	0.01875	0.03046	0.12123	0.03787	0.02357	0.09498	0.11682	0.02281	0.03896	0.08052	0.02494	0.58088	0.20142	0.17613	0.8469
BIOCARTA_LAIR_PATHWAY	0.284465	0.10509	0.54237	0.18398	0.1657	0.59809	0.31764	0.17642	0.10529	0.3699	0.27595	0.5257	0.013	0.31994	0.18102	0.60864	0.02322	0.5818	0.65637	0.37352	0.39467	0.85171	0.95481	0.96101	0.7038	0.15703	0.30398	0.18754	0.11088	0.67092	0.36391	0.64919	0.34072	0.57616	0.56916	0.26687	0.67665	0.60816	0.26332	0.94334	0.36515	0.51353	0.80427	0.51798	0.51474	0.75458	0.09306	0.03171	0.44742
KEGG_ONE_CARBON_POOL_BY_FOLATE	0.285955	0.69917	0.43987	0.85248	0.31116	0.12258	0.23909	0.76301	0.50591	0.5079	0.48927	0.58691	0.68745	0.72694	0.8052	0.4467	0.42957	0.09311	0.33703	0.12905	0.62011	0.39058	0.65826	0.68956	0.83669	0.35925	0.49386	0.34689	0.35508	0.71865	0.81365	0.6329	0.86506	0.08207	0.12686	0.16866	0.04821	0.05838	0.39676	0.13677	0.22421	0.10542	0.14335	0.18242	0.13876	0.26519	0.41657	0.76961	0.37157
BIOCARTA_EXTRINSIC_PATHWAY	0.286055	0.44358	0.25776	0.08604	0.63414	0.37303	0.96577	0.18269	0.74182	0.23709	0.44171	0.203	0.55196	0.8011	0.85774	0.58294	0.81301	0.19367	0.37138	0.13474	0.31115	0.70977	0.51293	0.3997	0.52458	0.37119	0.08448	0.07473	0.12885	0.55731	0.55203	0.195	0.60591	0.13576	0.28834	0.08509	0.45845	0.25171	0.9762	0.71823	0.94479	0.1334	0.30056	0.27846	0.15776	0.26934	0.70691	0.54947	0.76729
REACTOME_SIGNALING_BY_ACTIVATED_POINT_MUTANTS_OF_FGFR1	0.28718	0.17047	0.20764	0.3429	0.03514	0.14265	0.09365	0.45254	0.07598	0.2523	0.23658	0.30114	0.16137	0.09623	0.29472	0.27677	0.04043	0.53898	0.90705	0.58109	0.4667	0.45195	0.48395	0.23647	0.40599	0.57614	0.66344	0.64434	0.40384	0.39207	0.45324	0.61006	0.30253	0.40669	0.66196	0.83963	0.51893	0.38339	0.07858	0.26583	0.26877	0.48137	0.3752	0.46933	0.36177	0.61733	0.30944	0.61081	0.44291
BIOCARTA_TRKA_PATHWAY	0.287545	0.67989	0.71526	0.80544	0.6689	0.61008	0.01219	0.01886	0.09609	0.53949	0.3842	0.35123	0.12959	0.72654	0.33131	0.42671	0.46644	0.05271	0.01931	0.06962	0.10102	0.11581	0.02056	0.14944	0.23117	0.11881	0.24779	0.18341	0.1609	0.08558	0.09374	0.05839	0.22282	0.76171	0.57049	0.57579	0.55936	0.13396	0.01996	0.29755	0.05313	0.50707	0.44355	0.36616	0.4178	0.3499	0.16174	0.15071	0.35502
REACTOME_TRAF3_DEPENDENT_IRF_ACTIVATION_PATHWAY	0.287965	0.05608	0.05298	0.07804	0.28304	0.05056	0.27358	0.17402	0.25898	0.19391	0.2735	0.43617	0.02475	0.22126	0.67586	0.10079	0.82129	0.02199	0.14075	0.58343	0.03352	0.3759	0.65383	0.42733	0.18524	0.16183	0.02785	0.11509	0.17295	0.05637	0.29471	0.34934	0.20888	0.44122	0.44211	0.22027	0.55979	0.59724	0.37794	0.26837	0.84734	0.16904	0.15243	0.09591	0.03212	0.55688	0.77918	0.2271	0.88852
REACTOME_FRS2_MEDIATED_CASCADE	0.288365	0.62084	0.49905	0.46188	0.6863	0.54628	0.04901	0.07678	0.2142	0.25315	0.23071	0.10735	0.78312	0.87221	0.73734	0.87288	0.6345	0.40398	0.57127	0.5808	0.3749	0.19058	0.02413	0.09305	0.11082	0.84066	0.64617	0.68369	0.68053	0.2574	0.25444	0.11003	0.28466	0.20258	0.18657	0.46393	0.28526	0.22124	0.05029	0.36396	0.16996	0.12868	0.15615	0.35641	0.21988	0.74254	0.25175	0.93086	0.7255
REACTOME_REGULATION_OF_INSULIN_SECRETION_BY_GLUCAGON_LIKE_PEPTIDE1	0.288435	0.01778	0.09718	0.12969	0.03803	0.09216	0.58413	0.85922	0.33074	0.01407	0.0231	0.01298	0.4993	0.18303	0.55517	0.58609	0.25835	0.16272	0.20872	0.37273	0.20396	0.33795	0.11476	0.16851	0.16841	0.46769	0.79732	0.57866	0.67438	0.22746	0.28176	0.30032	0.26564	0.0156	0.03376	0.03415	0.03597	0.04302	0.54373	0.1244	0.64384	0.01068	0.06883	0.03095	0.05493	0.07805	0.78645	0.28187	0.39527
REACTOME_INTERACTIONS_OF_VPR_WITH_HOST_CELLULAR_PROTEINS	0.29001	0.68353	0.52022	0.59691	0.30288	0.19521	0.25061	0.54298	0.64682	0.84509	0.79299	0.68051	0.79235	0.15492	0.23007	0.13127	0.31052	0.2295	0.58117	0.25834	0.504	0.13653	0.22898	0.41444	0.19542	0.09383	0.11498	0.31869	0.31302	0.14253	0.2902	0.28926	0.28614	0.43417	0.63364	0.64879	0.52011	0.26665	0.74581	0.52506	0.23651	0.59581	0.51745	0.76378	0.20782	0.11597	0.09747	0.61988	0.28757
REACTOME_SIGNALING_BY_NOTCH2	0.290125	0.15553	0.10536	0.35311	0.01717	0.20596	0.37444	0.96007	0.45297	0.26916	0.1635	0.19696	0.88287	0.02407	0.16405	0.0338	0.21493	0.18293	0.60259	0.45487	0.24616	0.24949	0.2817	0.415	0.40067	0.53952	0.2103	0.30926	0.60311	0.28433	0.54603	0.23893	0.55443	0.22647	0.34016	0.38499	0.22504	0.59284	0.31791	0.08448	0.69048	0.28573	0.153	0.24986	0.20835	0.42592	0.46457	0.81495	0.61501
REACTOME_IL_3_5_AND_GM_CSF_SIGNALING	0.290235	0.21848	0.57825	0.07273	0.41904	0.74508	0.15221	0.02948	0.24111	0.07556	0.11857	0.08529	0.52388	0.80454	0.44768	0.77398	0.39592	0.69032	0.02293	0.08371	0.27716	0.05211	0.02202	0.03993	0.05181	0.41816	0.40851	0.29117	0.33005	0.2893	0.08205	0.04163	0.13905	0.0419	0.11084	0.01762	0.31824	0.07848	0.32985	0.3505	0.21641	0.03471	0.35544	0.15716	0.30319	0.30199	0.38033	0.18417	0.66302
REACTOME_GLUCAGON_SIGNALING_IN_METABOLIC_REGULATION	0.291435	0.03621	0.34704	0.5627	0.02723	0.32138	0.90272	0.94505	0.48785	0.1015	0.08987	0.15446	0.59871	0.14703	0.68109	0.76659	0.14059	0.2936	0.44026	0.41687	0.70107	0.54235	0.08078	0.31819	0.69608	0.28981	0.51723	0.4273	0.66372	0.68074	0.75712	0.82901	0.77257	0.1051	0.17924	0.33447	0.0291	0.1398	0.46729	0.04805	0.38279	0.22774	0.16028	0.19644	0.17241	0.1252	0.5373	0.44337	0.17064
BIOCARTA_MAL_PATHWAY	0.291615	0.02879	0.03774	0.11367	0.01392	0.05846	0.56183	0.20058	0.30164	0.07574	0.27921	0.11434	0.16201	0.04746	0.31936	0.29218	0.33747	0.22999	0.08466	0.10816	0.47266	0.70675	0.44435	0.32374	0.53293	0.63826	0.28488	0.33292	0.3852	0.56881	0.37745	0.73321	0.62419	0.06354	0.0446	0.26277	0.05828	0.14159	0.49267	0.1201	0.20116	0.24935	0.26755	0.36798	0.49991	0.34281	0.7044	0.93533	0.49936
REACTOME_SHC_MEDIATED_CASCADE	0.29252	0.31525	0.29374	0.31936	0.35101	0.2913	0.01975	0.14658	0.17869	0.15544	0.10003	0.08105	0.6303	0.54994	0.5912	0.52013	0.46856	0.1862	0.29685	0.35844	0.23908	0.21541	0.0216	0.20648	0.16214	0.77112	0.59804	0.72406	0.76904	0.18472	0.32466	0.07937	0.42599	0.29485	0.269	0.51793	0.56909	0.31592	0.02892	0.2131	0.28218	0.22215	0.08899	0.28645	0.16101	0.57071	0.16177	0.80407	0.78366
REACTOME_DCC_MEDIATED_ATTRACTIVE_SIGNALING	0.292985	0.35355	0.62045	0.79401	0.56712	0.49637	0.1546	0.53514	0.45987	0.65198	0.11565	0.7359	0.12465	0.72009	0.17936	0.49203	0.58981	0.28661	0.64556	0.30107	0.6626	0.2658	0.8401	0.39264	0.56091	0.24537	0.37074	0.08302	0.10648	0.28194	0.24425	0.33427	0.44735	0.61201	0.66273	0.80963	0.75986	0.44235	0.47508	0.47381	0.21754	0.52262	0.24906	0.56761	0.18856	0.51874	0.03799	0.35149	0.18846
REACTOME_THROMBOXANE_SIGNALLING_THROUGH_TP_RECEPTOR	0.293635	0.00814	0.65945	0.44549	0.06614	0.23384	0.43635	0.85243	0.24448	0.36996	0.75725	0.39958	0.08677	0.08762	0.33882	0.60113	0.17858	0.03843	0.34703	0.41436	0.24241	0.61266	0.15848	0.25974	0.28815	0.00577	0.35416	0.04824	0.19055	0.4478	0.33116	0.69515	0.318	0.3034	0.51977	0.07662	0.59068	0.34132	0.30214	0.06441	0.61275	0.1198	0.17283	0.11026	0.19467	0.81449	0.64299	0.52065	0.50094
BIOCARTA_THELPER_PATHWAY	0.293945	0.26355	0.47524	0.13247	0.54028	0.69978	0.13856	0.18581	0.75923	0.1951	0.39223	0.37894	0.11196	0.6274	0.66706	0.9236	0.63272	0.79101	0.60212	0.38294	0.69297	0.42065	0.11914	0.10611	0.24501	0.47703	0.65059	0.79556	0.46531	0.77014	0.20204	0.36558	0.27498	0.11129	0.05047	0.13776	0.13789	0.10525	0.00318	0.0793	0.02189	0.17475	0.35476	0.20257	0.23003	0.49043	0.01682	0.04328	0.27801
BIOCARTA_EIF2_PATHWAY	0.294065	0.5014	0.17475	0.64342	0.02485	0.16587	0.30503	0.95922	0.03279	0.6583	0.7811	0.58707	0.72041	0.08302	0.05092	0.38325	0.02	0.6356	0.59951	0.47572	0.26162	0.33037	0.4248	0.57018	0.27322	0.23035	0.12576	0.32647	0.42237	0.24042	0.27709	0.62571	0.10567	0.12956	0.12222	0.42728	0.00959	0.32566	0.88969	0.96519	0.46716	0.42028	0.72102	0.54864	0.20608	0.02529	0.19948	0.17895	0.02064
BIOCARTA_IGF1_PATHWAY	0.294665	0.21034	0.03013	0.49053	0.02162	0.0105	0.00297	0.02941	0.01487	0.40447	0.56982	0.4435	0.9084	0.05886	0.02811	0.12046	0.05239	0.51648	0.52691	0.35235	0.45118	0.06269	0.14494	0.29091	0.4796	0.88646	0.66051	0.6346	0.7502	0.1282	0.26098	0.35131	0.28583	0.29501	0.08721	0.75196	0.02591	0.17017	0.07597	0.64913	0.02491	0.78333	0.81794	0.76105	0.82888	0.03586	0.05201	0.31255	0.10392
REACTOME_CLASS_C_3_METABOTROPIC_GLUTAMATE_PHEROMONE_RECEPTORS	0.295085	0.05966	0.46317	0.03633	0.68427	0.66131	0.8356	0.19074	0.69287	0.02239	0.11261	0.02162	0.49714	0.84148	0.86627	0.88104	0.83485	0.57563	0.90424	0.89352	0.48837	0.27788	0.65377	0.25781	0.15067	0.14638	0.31732	0.29726	0.63522	0.47169	0.27126	0.44444	0.41906	0.22858	0.28241	0.14689	0.46595	0.22612	0.10383	0.03577	0.32632	0.08061	0.12352	0.08316	0.07735	0.9281	0.79227	0.49858	0.60462
KEGG_DORSO_VENTRAL_AXIS_FORMATION	0.297115	0.52878	0.46529	0.47602	0.63349	0.17277	0.04191	0.00187	0.0017	0.34649	0.2502	0.44001	0.46747	0.29244	0.01061	0.25435	0.00679	0.07444	0.03626	0.25284	0.00235	0.03443	0.01109	0.00207	0.00221	0.26412	0.43117	0.18491	0.51576	0.00084	0.00212	0.00165	0.00275	0.32541	0.41027	0.12576	0.28764	0.39815	0.38352	0.74793	0.01245	0.12536	0.253	0.14935	0.05428	0.51146	0.56709	0.49457	0.01038
REACTOME_ADP_SIGNALLING_THROUGH_P2RY1	0.29842	0.0072	0.75982	0.43214	0.12814	0.29572	0.47784	0.85539	0.33395	0.38163	0.8227	0.50849	0.07837	0.14881	0.38379	0.67274	0.26377	0.05059	0.41272	0.49236	0.27283	0.66564	0.14297	0.21001	0.23986	0.00292	0.24248	0.02656	0.12913	0.4922	0.26588	0.72139	0.30783	0.26064	0.49568	0.08825	0.56324	0.29353	0.22564	0.07634	0.5439	0.12525	0.22304	0.14662	0.24344	0.78066	0.67557	0.55217	0.56396
REACTOME_SIGNAL_AMPLIFICATION	0.300535	0.00893	0.62875	0.61673	0.05793	0.18876	0.23084	0.53044	0.15658	0.57409	0.94697	0.74991	0.13627	0.08127	0.17505	0.44169	0.21777	0.09404	0.54808	0.54329	0.29214	0.3955	0.03278	0.07407	0.08674	0.00782	0.25579	0.0473	0.13437	0.47169	0.10504	0.49832	0.1848	0.2659	0.60986	0.21884	0.58245	0.50063	0.20806	0.1432	0.26475	0.19393	0.28477	0.29993	0.24155	0.78881	0.59302	0.76622	0.49126
REACTOME_MUSCLE_CONTRACTION	0.300855	0.78354	0.56257	0.90011	0.42899	0.56098	0.0628	0.23476	0.20988	0.76869	0.70078	0.84003	0.5618	0.7459	0.23206	0.68343	0.24614	0.16177	0.13411	0.03555	0.48326	0.19373	0.28709	0.15261	0.33406	0.24544	0.39969	0.24399	0.25719	0.41813	0.07993	0.14143	0.23697	0.09509	0.10911	0.46469	0.04676	0.16798	0.30891	0.66658	0.01505	0.32283	0.48683	0.85087	0.46878	0.17419	0.03543	0.46823	0.06334
REACTOME_REGULATION_OF_WATER_BALANCE_BY_RENAL_AQUAPORINS	0.30102	0.087	0.4925	0.62098	0.07322	0.4454	0.86535	0.96349	0.65849	0.21231	0.19723	0.28526	0.48725	0.21731	0.77043	0.85084	0.29526	0.29008	0.34963	0.30056	0.7419	0.44779	0.14854	0.53826	0.74807	0.05551	0.14895	0.04991	0.2022	0.75038	0.75436	0.90528	0.79105	0.20737	0.40044	0.4707	0.05668	0.19992	0.57846	0.08845	0.51896	0.33805	0.31035	0.3365	0.30157	0.14806	0.50103	0.59519	0.26084
REACTOME_G_ALPHA_Q_SIGNALLING_EVENTS	0.301055	0.07635	0.4359	0.1346	0.30341	0.47742	0.90679	0.99097	0.72243	0.09522	0.39964	0.18256	0.44397	0.18381	0.72351	0.45212	0.31978	0.14803	0.68959	0.43813	0.5038	0.71384	0.2724	0.67401	0.5216	0.34382	0.85216	0.42777	0.93534	0.69184	0.6793	0.86832	0.73079	0.17812	0.31749	0.11974	0.29914	0.46589	0.10723	0.18191	0.67263	0.07679	0.02834	0.04128	0.03267	0.8971	0.73409	0.78504	0.64813
REACTOME_PEPTIDE_HORMONE_BIOSYNTHESIS	0.301755	0.11581	0.65483	0.10541	0.68437	0.96087	0.15759	0.16697	0.88097	0.21614	0.05486	0.62128	0.00591	0.9854	0.74931	0.95001	0.79131	0.52425	0.68191	0.25206	0.96572	0.36639	0.26304	0.29372	0.17419	0.02227	0.22634	0.08189	0.08749	0.72344	0.15674	0.31445	0.33202	0.53888	0.92874	0.5803	0.77368	0.8924	0.38007	0.85649	0.51812	0.80312	0.77205	0.89289	0.8511	0.73829	0.4564	0.6814	0.45025
REACTOME_PROCESSIVE_SYNTHESIS_ON_THE_LAGGING_STRAND	0.301925	0.28621	0.70317	0.59822	0.21176	0.22884	0.70948	0.48653	0.31778	0.49487	0.37395	0.39488	0.30489	0.05206	0.73285	0.12415	0.26608	0.00405	0.00478	0.00583	0.01465	0.04657	0.04583	0.1154	0.07052	0.69757	0.82313	0.83666	0.96903	0.01168	0.19285	0.00753	0.17771	0.16112	0.05911	0.06192	0.29549	0.62874	0.82855	0.63812	0.97911	0.06794	0.03487	0.11871	0.01931	0.36899	0.71235	0.27955	0.85041
REACTOME_PHOSPHORYLATION_OF_CD3_AND_TCR_ZETA_CHAINS	0.30277	0.13285	0.48876	0.37458	0.4149	0.76049	0.10805	0.09757	0.4913	0.2104	0.39015	0.58382	0.04255	0.6842	0.66475	0.93595	0.68215	0.8106	0.6719	0.35783	0.6757	0.27837	0.04105	0.01674	0.06407	0.12546	0.07558	0.19185	0.08309	0.5267	0.03101	0.19667	0.17088	0.30604	0.36154	0.66971	0.35298	0.36146	0.02131	0.0861	0.04202	0.68169	0.53065	0.80547	0.46098	0.35134	0.06961	0.1485	0.28054
REACTOME_INTERFERON_ALPHA_BETA_SIGNALING	0.302805	0.0182	0.18358	0.15754	0.09459	0.3306	0.56836	0.55038	0.2735	0.03594	0.50119	0.3188	0.1231	0.31025	0.55928	0.80572	0.25964	0.28317	0.30296	0.29884	0.47458	0.63079	0.26251	0.19506	0.25819	0.23955	0.01696	0.14459	0.21193	0.64951	0.23149	0.68751	0.2085	0.40815	0.58563	0.66912	0.40378	0.88247	0.8788	0.57254	0.49596	0.5016	0.66283	0.55615	0.46348	0.3942	0.38938	0.84652	0.16091
BIOCARTA_CBL_PATHWAY	0.30365	0.22476	0.65154	0.50128	0.78501	0.33066	0.07487	0.53237	0.08038	0.62304	0.64138	0.50124	0.02928	0.54894	0.04186	0.40617	0.15707	0.17406	0.85394	0.5342	0.25439	0.13739	0.67981	0.1529	0.1508	0.0211	0.26127	0.01719	0.10759	0.05102	0.01415	0.28958	0.02143	0.32486	0.03069	0.12728	0.01453	0.03956	0.49013	0.32848	0.01983	0.39197	0.3905	0.28527	0.39421	0.01419	0.00815	0.00888	0.01213
BIOCARTA_SHH_PATHWAY	0.30407	0.57117	0.05539	0.42535	0.06211	0.08352	0.04883	0.08838	0.08411	0.32566	0.22819	0.56083	0.66587	0.061	0.0457	0.17255	0.04048	0.70391	0.7494	0.89824	0.3594	0.19935	0.21672	0.07255	0.08262	0.47557	0.29964	0.19432	0.47242	0.18204	0.03273	0.09777	0.06289	0.75039	0.81307	0.63223	0.68297	0.82274	0.65717	0.3413	0.45052	0.9606	0.76483	0.77553	0.92826	0.10973	0.39821	0.51889	0.08037
REACTOME_SIGNALING_BY_PDGF	0.304075	0.76875	0.59861	0.68789	0.35348	0.64344	0.73146	0.15813	0.31723	0.26116	0.20494	0.22186	0.9884	0.7616	0.62308	0.96297	0.53348	0.53874	0.26731	0.23394	0.49941	0.20898	0.07739	0.12496	0.20621	0.76768	0.79733	0.63625	0.86829	0.26277	0.19123	0.14201	0.33727	0.00353	0.00614	0.03218	0.01548	0.45474	0.42024	0.18131	0.28669	0.01547	0.13965	0.14723	0.04842	0.54688	0.89343	0.96927	0.56345
REACTOME_GLYCOPROTEIN_HORMONES	0.30441	0.15064	0.49829	0.1813	0.83819	0.88975	0.12543	0.27631	0.80832	0.19914	0.0478	0.69571	0.00621	0.98529	0.65668	0.88476	0.88484	0.40107	0.6422	0.29779	0.98977	0.40716	0.30245	0.62894	0.36543	0.01468	0.13318	0.05437	0.04329	0.77465	0.30889	0.48891	0.69432	0.45242	0.84596	0.69399	0.61188	0.95642	0.41044	0.92286	0.44198	0.78171	0.72011	0.9418	0.88658	0.55977	0.34547	0.69473	0.38134
BIOCARTA_BAD_PATHWAY	0.30468	0.83887	0.31949	0.96836	0.12859	0.36009	0.1347	0.71426	0.06425	0.8451	0.55627	0.75107	0.71085	0.16926	0.06272	0.30989	0.02889	0.73076	0.39491	0.45505	0.39803	0.14909	0.45636	0.41805	0.45535	0.34267	0.336	0.17472	0.18841	0.17181	0.21037	0.39695	0.25093	0.71513	0.62907	0.69305	0.07555	0.70776	0.23289	0.4524	0.13403	0.72382	0.53531	0.40511	0.63751	0.12055	0.17358	0.72948	0.02304
REACTOME_3_UTR_MEDIATED_TRANSLATIONAL_REGULATION	0.304775	0.06295	0.0496	0.38038	0.00298	0.15105	0.39781	0.47148	0.10032	0.17739	0.30738	0.07272	0.82388	0.05205	0.21989	0.39809	0.04247	0.62021	0.42189	0.51548	0.05859	0.51621	0.39765	0.1466	0.14842	0.75017	0.18718	0.48604	0.381	0.30605	0.13173	0.12098	0.0947	0.07134	0.03568	0.0863	0.1995	0.16205	0.45669	0.34157	0.65732	0.19911	0.25292	0.13948	0.36449	0.15517	0.40457	0.05455	0.19754
REACTOME_GLUCOSE_TRANSPORT	0.30624	0.84605	0.57536	0.68678	0.3289	0.27986	0.17744	0.41607	0.53504	0.82897	0.68769	0.77895	0.95132	0.04914	0.20307	0.03815	0.14586	0.27464	0.61966	0.38308	0.30971	0.30598	0.44541	0.54209	0.44272	0.06257	0.00701	0.02026	0.21058	0.07257	0.38198	0.37332	0.44388	0.40692	0.62639	0.37268	0.60709	0.1736	0.21683	0.04121	0.15494	0.29658	0.09076	0.29069	0.02747	0.20625	0.32791	0.79311	0.65226
KEGG_PRIMARY_BILE_ACID_BIOSYNTHESIS	0.30687	0.6667	0.99226	0.99494	0.77053	0.42575	0.36419	0.60651	0.27154	0.99102	0.73683	0.88233	0.34483	0.73054	0.21198	0.93426	0.33799	0.80778	0.66133	0.60687	0.28997	0.00237	0.01887	0.51434	0.09984	0.98742	0.67738	0.89586	0.16343	0.19542	0.24856	0.15308	0.22592	0.89366	0.4209	0.71492	0.15221	0.02298	0.37997	0.1161	0.0914	0.79134	0.56288	0.49752	0.45653	0.11579	0.19718	0.00159	0.15486
BIOCARTA_INTEGRIN_PATHWAY	0.30699	0.15982	0.21379	0.051	0.39168	0.23956	0.18726	0.04792	0.20032	0.04349	0.10587	0.02112	0.37182	0.36761	0.31558	0.51783	0.34799	0.10263	0.21888	0.19688	0.42247	0.21454	0.32198	0.16891	0.17443	0.18675	0.45271	0.17751	0.28572	0.1853	0.08868	0.17962	0.21064	0.0348	0.02736	0.05749	0.05263	0.22448	0.72848	0.54688	0.09298	0.04006	0.32293	0.28631	0.19136	0.3253	0.17882	0.8253	0.28143
REACTOME_NRAGE_SIGNALS_DEATH_THROUGH_JNK	0.30767	0.11092	0.19816	0.27729	0.13061	0.34253	0.08243	0.18513	0.37655	0.18193	0.10341	0.4606	0.05829	0.46437	0.51136	0.49736	0.51141	0.19009	0.02196	0.02752	0.61947	0.31532	0.09849	0.1695	0.54771	0.39712	0.03601	0.16721	0.13626	0.54119	0.55319	0.21267	0.73028	0.15988	0.16637	0.54408	0.08704	0.50272	0.44136	0.77164	0.56633	0.39482	0.59821	0.80949	0.41952	0.22668	0.36481	0.60126	0.46223
KEGG_HEDGEHOG_SIGNALING_PATHWAY	0.30778	0.62506	0.03133	0.09955	0.07445	0.04658	0.17244	0.39912	0.14237	0.10395	0.30522	0.07953	0.97096	0.1084	0.1207	0.07874	0.26578	0.17712	0.26894	0.4367	0.28387	0.26838	0.32715	0.21462	0.27483	0.76433	0.28811	0.59961	0.42564	0.25601	0.27989	0.24446	0.37031	0.2217	0.19266	0.26903	0.0974	0.14377	0.15794	0.23656	0.1286	0.62793	0.57219	0.56742	0.80605	0.01011	0.08927	0.13121	0.14199
REACTOME_SYNTHESIS_SECRETION_AND_DEACYLATION_OF_GHRELIN	0.308235	0.79688	0.48439	0.75084	0.67527	0.35923	0.10612	0.49242	0.37164	0.25617	0.08985	0.11709	0.73874	0.16995	0.14061	0.20384	0.65603	0.84096	0.37596	0.77697	0.1716	0.36298	0.09584	0.37587	0.26888	0.0249	0.13478	0.0276	0.52555	0.20941	0.60221	0.25707	0.63836	0.07116	0.03867	0.06793	0.19554	0.1683	0.03241	0.04388	0.50569	0.00419	0.00089	0.00378	0.00078	0.23229	0.45539	0.40439	0.89765
REACTOME_MRNA_SPLICING	0.308245	0.13786	0.13628	0.22683	0.20843	0.12246	0.28951	0.48297	0.13536	0.09049	0.07465	0.09192	0.50856	0.04206	0.08578	0.0821	0.0642	0.34804	0.28298	0.23834	0.08712	0.74202	0.52522	0.56259	0.36179	0.12053	0.06877	0.09512	0.0617	0.06963	0.42217	0.15932	0.14031	0.04982	0.38524	0.19477	0.44319	0.20714	0.76813	0.33538	0.92976	0.01239	0.02942	0.06061	0.01374	0.24661	0.62634	0.84626	0.46539
BIOCARTA_TCYTOTOXIC_PATHWAY	0.309545	0.1867	0.61677	0.1017	0.47813	0.81769	0.23569	0.16596	0.90137	0.16798	0.38973	0.36026	0.10584	0.61786	0.82623	0.91318	0.64987	0.81243	0.33141	0.2885	0.66396	0.52657	0.04019	0.02718	0.15608	0.53114	0.44196	0.83227	0.53	0.91992	0.1521	0.16813	0.23462	0.23861	0.13716	0.19359	0.30863	0.20597	0.0082	0.07716	0.03413	0.30004	0.52275	0.23632	0.39368	0.65297	0.03904	0.07037	0.4375
REACTOME_REGULATION_OF_KIT_SIGNALING	0.309965	0.23856	0.25841	0.02894	0.63365	0.09278	0.01096	0.02157	0.03537	0.09508	0.04429	0.09699	0.1683	0.53312	0.209	0.16815	0.14479	0.10733	0.28648	0.23815	0.05376	0.06799	0.4263	0.02384	0.0586	0.16853	0.2292	0.03317	0.11464	0.01711	0.01916	0.03414	0.01576	0.60598	0.75861	0.23328	0.87857	0.31957	0.90962	0.99778	0.2663	0.56014	0.73889	0.66468	0.69391	0.16829	0.13087	0.17112	0.09984
BIOCARTA_VEGF_PATHWAY	0.310835	0.93141	0.16273	0.26644	0.75408	0.27356	0.13434	0.7577	0.69851	0.52029	0.21314	0.14676	0.7384	0.77373	0.42726	0.53024	0.79171	0.64812	0.42586	0.33805	0.75374	0.33321	0.48726	0.84302	0.61316	0.02084	0.04244	0.01693	0.01559	0.63531	0.62402	0.76185	0.5874	0.22646	0.09584	0.24534	0.10483	0.15836	0.0475	0.28991	0.27337	0.16974	0.17615	0.12251	0.11612	0.06764	0.10121	0.1483	0.34088
REACTOME_BIOLOGICAL_OXIDATIONS	0.312125	0.76515	0.77468	0.33748	0.57457	0.86208	0.58594	0.51871	0.34266	0.172	0.04507	0.31289	0.58374	0.69171	0.36431	0.62297	0.1721	0.50773	0.14042	0.10274	0.12085	0.0404	0.38279	0.15288	0.06676	0.64733	0.56035	0.34474	0.48824	0.13406	0.18382	0.02618	0.15049	0.19717	0.20488	0.28715	0.33091	0.93336	0.80471	0.949	0.41716	0.11098	0.11282	0.43968	0.03424	0.83442	0.47251	0.65976	0.28237
REACTOME_ACTIVATION_OF_THE_MRNA_UPON_BINDING_OF_THE_CAP_BINDING_COMPLEX_AND_EIFS_AND_SUBSEQUENT_BINDING_TO_43S	0.312245	0.06863	0.09448	0.46468	0.00393	0.49532	0.56126	0.36896	0.16234	0.1369	0.21163	0.0838	0.72912	0.05679	0.19565	0.51857	0.0383	0.82441	0.78621	0.76695	0.15848	0.63423	0.37166	0.15958	0.26215	0.78805	0.44592	0.64641	0.56811	0.47585	0.26476	0.3103	0.15041	0.33573	0.19294	0.3277	0.40596	0.26566	0.47332	0.21163	0.57505	0.38034	0.17166	0.1424	0.61981	0.22428	0.50491	0.11039	0.21594
REACTOME_G_ALPHA_Z_SIGNALLING_EVENTS	0.3134	0.04765	0.83358	0.64183	0.14788	0.56353	0.6959	0.65876	0.58191	0.23509	0.07229	0.19601	0.06936	0.38165	0.69335	0.75414	0.46212	0.15511	0.2372	0.22586	0.37613	0.48622	0.06062	0.46956	0.37375	0.01233	0.38274	0.0771	0.10637	0.64142	0.6088	0.70606	0.6712	0.12735	0.26986	0.40403	0.10365	0.39456	0.14192	0.09502	0.46569	0.12049	0.0678	0.17782	0.10104	0.44361	0.54623	0.6997	0.51768
REACTOME_ADP_SIGNALLING_THROUGH_P2RY12	0.31353	0.0071	0.56278	0.5539	0.02942	0.1633	0.32363	0.35138	0.15693	0.57977	0.8718	0.83231	0.09436	0.0521	0.22206	0.23182	0.17293	0.02473	0.34879	0.32605	0.1574	0.28283	0.01956	0.04992	0.06606	0.0241	0.51689	0.23311	0.13877	0.33656	0.10734	0.3916	0.1388	0.37627	0.57743	0.36155	0.42373	0.27474	0.12029	0.04731	0.15197	0.48509	0.24331	0.36431	0.28136	0.47224	0.35729	0.25058	0.29136
KEGG_PORPHYRIN_AND_CHLOROPHYLL_METABOLISM	0.31364	0.31158	0.00751	0.14716	0.00453	0.00725	0.01988	0.20982	0.02973	0.10951	0.09179	0.14885	0.82401	0.02292	0.0134	0.05691	0.01959	0.40535	0.48725	0.61923	0.06058	0.13872	0.48176	0.19316	0.15378	0.80821	0.92237	0.72427	0.94332	0.04638	0.09853	0.15534	0.05545	0.21635	0.34347	0.32605	0.25069	0.65399	0.56959	0.55062	0.6663	0.43004	0.74928	0.55458	0.69373	0.0969	0.6135	0.79405	0.19159
REACTOME_FORMATION_OF_TUBULIN_FOLDING_INTERMEDIATES_BY_CCT_TRIC	0.314335	0.51732	0.51685	0.71978	0.20779	0.4556	0.8554	0.21151	0.83808	0.59026	0.96067	0.85292	0.14432	0.48384	0.82056	0.22346	0.66641	0.3413	0.38528	0.29119	0.73354	0.91106	0.34315	0.37754	0.9532	0.23846	0.18259	0.13937	0.0634	0.85967	0.81646	0.83966	0.74028	0.26491	0.66879	0.62712	0.15383	0.05564	0.25641	0.18731	0.43867	0.54343	0.63518	0.65337	0.58323	0.28771	0.8018	0.12114	0.75994
REACTOME_MEIOTIC_RECOMBINATION	0.31522	0.60004	0.52139	0.8576	0.29251	0.64393	0.27714	0.25419	0.04863	0.7803	0.73976	0.70558	0.06385	0.31479	0.05972	0.45883	0.02651	0.48721	0.07386	0.08591	0.19363	0.70762	0.61929	0.07184	0.1657	0.47533	0.60503	0.68907	0.77416	0.23986	0.04337	0.05444	0.02687	0.51235	0.25103	0.21192	0.20551	0.07808	0.46993	0.13562	0.12751	0.30953	0.41332	0.22651	0.41748	0.29972	0.18724	0.3288	0.02723
REACTOME_BMAL1_CLOCK_NPAS2_ACTIVATES_CIRCADIAN_EXPRESSION	0.31638	0.1269	0.11711	0.05202	0.22108	0.21649	0.56641	0.51017	0.54695	0.2778	0.70062	0.17508	0.2035	0.19663	0.43624	0.22359	0.41076	0.14635	0.53256	0.29471	0.46725	0.35429	0.37417	0.44696	0.39156	0.31337	0.23717	0.13568	0.44704	0.58026	0.4883	0.50561	0.40602	0.14814	0.05067	0.07013	0.14884	0.57305	0.33338	0.24843	0.44816	0.10198	0.29303	0.14464	0.16246	0.13155	0.2206	0.32761	0.2558
BIOCARTA_AT1R_PATHWAY	0.31644	0.21841	0.67886	0.14765	0.69767	0.47054	0.29995	0.23703	0.10238	0.27615	0.11954	0.18938	0.15024	0.68056	0.201	0.84832	0.22337	0.39246	0.81132	0.80042	0.39778	0.17649	0.14692	0.13539	0.09869	0.0029	0.06956	0.01106	0.01962	0.16558	0.05095	0.30866	0.07383	0.32465	0.64994	0.24711	0.70511	0.70848	0.97489	0.97909	0.48371	0.2432	0.42671	0.48216	0.33562	0.64136	0.82683	0.93659	0.47635
BIOCARTA_VDR_PATHWAY	0.316475	0.38411	0.44215	0.15677	0.63877	0.22934	0.93899	0.17209	0.39234	0.58168	0.47886	0.32837	0.06436	0.42815	0.65736	0.17211	0.37992	0.01883	0.0553	0.01184	0.1117	0.61659	0.70381	0.76985	0.35723	0.70516	0.60051	0.70232	0.88826	0.30318	0.46976	0.65166	0.36875	0.15875	0.03438	0.0882	0.07807	0.28907	0.64035	0.57086	0.4094	0.05228	0.06358	0.04879	0.03468	0.16923	0.24137	0.28843	0.2077
REACTOME_PROCESSING_OF_CAPPED_INTRON_CONTAINING_PRE_MRNA	0.31684	0.31664	0.17027	0.33293	0.27751	0.13752	0.26704	0.47765	0.26489	0.19447	0.13804	0.1139	0.79879	0.05275	0.13249	0.06041	0.1054	0.28506	0.26874	0.19979	0.08829	0.66724	0.42284	0.55697	0.34133	0.1803	0.09104	0.1713	0.14642	0.06242	0.45718	0.13689	0.22276	0.04747	0.40744	0.1864	0.56587	0.16429	0.85349	0.35648	0.95402	0.01138	0.02971	0.05894	0.00562	0.28555	0.68812	0.89513	0.68087
BIOCARTA_TFF_PATHWAY	0.317395	0.96304	0.93231	0.67707	0.97802	0.76642	0.07814	0.01868	0.07125	0.56073	0.2613	0.14955	0.35929	0.96368	0.3718	0.75967	0.34972	0.85495	0.37781	0.44196	0.58885	0.31522	0.06965	0.05964	0.12894	0.39593	0.45474	0.15672	0.23851	0.22638	0.03667	0.17888	0.07259	0.21556	0.22705	0.05693	0.23874	0.0656	0.05992	0.04864	0.02769	0.1037	0.30652	0.07549	0.23878	0.32827	0.29172	0.42507	0.12682
KEGG_INTESTINAL_IMMUNE_NETWORK_FOR_IGA_PRODUCTION	0.319165	0.29379	0.20562	0.14348	0.05158	0.57242	0.91263	0.79425	0.91076	0.14865	0.24205	0.20117	0.1015	0.32995	0.56732	0.65377	0.28989	0.91635	0.39427	0.20238	0.89643	0.91253	0.46477	0.45465	0.8033	0.09234	0.0741	0.247	0.12558	0.92602	0.84816	0.84717	0.78504	0.04341	0.09175	0.19338	0.033	0.12741	0.5864	0.52863	0.6343	0.14372	0.29965	0.54248	0.32139	0.03466	0.38377	0.2424	0.18305
REACTOME_PROTEIN_FOLDING	0.319255	0.29061	0.89103	0.67322	0.47002	0.92274	0.94182	0.32075	0.86568	0.40283	0.91781	0.71574	0.09495	0.62207	0.85775	0.87467	0.38191	0.5231	0.30208	0.27482	0.7571	0.9517	0.35971	0.39214	0.87835	0.06613	0.52526	0.30339	0.42127	0.83233	0.67965	0.64668	0.60145	0.21628	0.53913	0.17048	0.42521	0.17337	0.13423	0.21421	0.36662	0.33649	0.51367	0.42311	0.78165	0.74051	0.71191	0.35266	0.69193
BIOCARTA_ASBCELL_PATHWAY	0.321595	0.47327	0.62092	0.7511	0.28681	0.75176	0.3456	0.23589	0.11265	0.32053	0.41816	0.5954	0.57063	0.42276	0.25141	0.77881	0.12026	0.71486	0.19792	0.15045	0.27944	0.1996	0.1461	0.05722	0.0443	0.21395	0.3321	0.62783	0.25621	0.20288	0.03531	0.1581	0.04074	0.05213	0.05542	0.30726	0.03437	0.07215	0.19914	0.07374	0.01049	0.09408	0.10647	0.42255	0.08147	0.19942	0.08619	0.5114	0.02143
REACTOME_SYNTHESIS_SECRETION_AND_INACTIVATION_OF_GLP1	0.321685	0.55484	0.84188	0.80289	0.34024	0.31427	0.70561	0.51256	0.25827	0.32763	0.11358	0.21091	0.62242	0.17711	0.67952	0.60087	0.32794	0.55176	0.54544	0.57249	0.25608	0.51879	0.26493	0.53504	0.59548	0.38221	0.13796	0.20252	0.61683	0.17634	0.84662	0.48897	0.63287	0.05213	0.04439	0.01932	0.1891	0.0914	0.10764	0.00718	0.6146	0.0027	0.00085	0.00169	0.00122	0.41857	0.98793	0.49528	0.94669
REACTOME_G_PROTEIN_ACTIVATION	0.321835	0.00579	0.51086	0.37707	0.02675	0.14076	0.51457	0.36625	0.24605	0.52443	0.8643	0.78974	0.07225	0.03414	0.32189	0.13504	0.24815	0.00868	0.2582	0.34855	0.13346	0.45994	0.13859	0.10307	0.18352	0.02273	0.69136	0.28294	0.32423	0.26723	0.2689	0.37552	0.17894	0.34854	0.71791	0.14504	0.67277	0.23588	0.25196	0.02371	0.52206	0.31186	0.17979	0.15806	0.22482	0.68503	0.76428	0.31042	0.68993
REACTOME_EXTRACELLULAR_MATRIX_ORGANIZATION	0.32234	0.0587	0.19571	0.19317	0.11569	0.19405	0.55447	0.0888	0.40935	0.07621	0.39967	0.48494	0.17954	0.20438	0.60979	0.70339	0.16636	0.57701	0.18741	0.04152	0.43418	0.24429	0.21521	0.25785	0.19079	0.49633	0.60383	0.32868	0.81242	0.56638	0.4805	0.15053	0.56146	0.24875	0.11072	0.20991	0.26369	0.65798	0.6592	0.52082	0.82515	0.7756	0.86526	0.82681	0.89538	0.71295	0.30294	0.72332	0.34042
REACTOME_MRNA_PROCESSING	0.323225	0.2692	0.21078	0.41868	0.24226	0.14306	0.18375	0.48354	0.35346	0.21656	0.24377	0.21733	0.80767	0.07293	0.12908	0.06097	0.1603	0.439	0.4131	0.29229	0.13105	0.52279	0.35722	0.5076	0.32096	0.14001	0.13306	0.17178	0.30211	0.07865	0.46778	0.1458	0.27793	0.03369	0.33394	0.26244	0.53401	0.20403	0.84359	0.48525	0.95909	0.01402	0.06394	0.1396	0.0117	0.28705	0.56123	0.91072	0.71235
REACTOME_S_PHASE	0.323485	0.09337	0.00581	0.53259	0.00433	0.01112	0.13181	0.28502	0.19995	0.38768	0.53139	0.46281	0.41009	0.00183	0.05796	0.00239	0.04623	0.24609	0.33563	0.39213	0.14083	0.4005	0.66429	0.22543	0.56357	0.53805	0.15973	0.7194	0.1848	0.21184	0.82488	0.18431	0.36297	0.34602	0.20451	0.40725	0.43336	0.67786	0.94806	0.88895	0.96726	0.25831	0.18444	0.3285	0.21184	0.08653	0.37693	0.02555	0.38811
REACTOME_GENERIC_TRANSCRIPTION_PATHWAY	0.324	0.52065	0.33032	0.2578	0.60443	0.41931	0.57455	0.35886	0.31032	0.51148	0.60875	0.19163	0.25458	0.36047	0.3739	0.04694	0.39267	0.31148	0.63597	0.53761	0.24275	0.2429	0.57865	0.09463	0.1365	0.22854	0.11169	0.09319	0.07865	0.21883	0.16295	0.26535	0.07376	0.67305	0.51459	0.20358	0.67213	0.6398	0.5056	0.26952	0.17976	0.32375	0.1464	0.07667	0.21971	0.49056	0.76673	0.10092	0.16651
BIOCARTA_ATM_PATHWAY	0.324245	0.24503	0.06299	0.09172	0.17384	0.40949	0.85304	0.26279	0.21133	0.01114	0.00332	0.00592	0.92338	0.48116	0.40147	0.72089	0.09152	0.70521	0.21801	0.17178	0.05166	0.93448	0.27085	0.16028	0.09272	0.91866	0.55993	0.95017	0.56128	0.24142	0.15347	0.02477	0.05777	0.00369	0.00058	0.01086	0.02741	0.12801	0.18633	0.59	0.48314	0.00542	0.01691	0.0105	0.01998	0.42599	0.52128	0.87377	0.22653
REACTOME_NCAM1_INTERACTIONS	0.32428	0.44425	0.81596	0.83724	0.42118	0.53973	0.5677	0.12108	0.34021	0.67715	0.26274	0.37687	0.38639	0.35424	0.3831	0.82113	0.36035	0.28012	0.37156	0.36751	0.2042	0.0849	0.39339	0.35401	0.26515	0.1179	0.45766	0.26008	0.45612	0.15428	0.24838	0.13512	0.29293	0.37827	0.42366	0.43765	0.63888	0.43325	0.31691	0.24932	0.55724	0.33822	0.06071	0.13503	0.08962	0.67431	0.68212	0.6043	0.57932
REACTOME_DAG_AND_IP3_SIGNALING	0.324795	0.30902	0.3893	0.30223	0.2268	0.61279	0.95625	0.76303	0.49654	0.0272	0.04285	0.01862	0.71541	0.64018	0.72979	0.87752	0.59334	0.9257	0.42182	0.60826	0.58697	0.42672	0.0976	0.19307	0.23292	0.07365	0.2083	0.04372	0.3305	0.53922	0.29129	0.27755	0.43324	0.00329	0.02253	0.03247	0.01079	0.17562	0.86402	0.39899	0.57901	0.00413	0.04465	0.02427	0.02936	0.04969	0.87192	0.87659	0.43117
KEGG_LEUKOCYTE_TRANSENDOTHELIAL_MIGRATION	0.324795	0.54299	0.75219	0.48543	0.93306	0.60544	0.12747	0.51127	0.36405	0.28821	0.1062	0.1273	0.11112	0.52395	0.2673	0.37351	0.43768	0.3622	0.10021	0.3218	0.24058	0.37999	0.19925	0.58984	0.25773	0.19438	0.35147	0.05549	0.17926	0.30633	0.27835	0.2454	0.31605	0.03347	0.03698	0.01893	0.36831	0.06758	0.25329	0.24205	0.35004	0.01093	0.1034	0.04299	0.06453	0.50901	0.21361	0.32624	0.67989
REACTOME_ACTIVATED_POINT_MUTANTS_OF_FGFR2	0.32569	0.26876	0.66865	0.40712	0.3774	0.7062	0.45016	0.58065	0.50367	0.37271	0.40964	0.43128	0.17767	0.60314	0.79638	0.76587	0.28328	0.4119	0.92891	0.53808	0.83717	0.85587	0.35546	0.55109	0.54188	0.59445	0.69196	0.65516	0.55724	0.74884	0.59396	0.87943	0.61861	0.79921	0.83451	0.90183	0.77394	0.52928	0.03227	0.20105	0.35422	0.58943	0.29724	0.50696	0.36196	0.77106	0.07371	0.57678	0.42585
REACTOME_CELL_CYCLE_CHECKPOINTS	0.326125	0.32736	0.00364	0.51394	0.01855	0.03719	0.01514	0.03648	0.17835	0.26571	0.27522	0.11556	0.84302	0.06186	0.02699	0.03267	0.0684	0.71817	0.43021	0.40431	0.33668	0.4006	0.84623	0.27968	0.64804	0.52863	0.18954	0.76173	0.1728	0.56235	0.73102	0.36231	0.3152	0.12169	0.03174	0.0901	0.16191	0.30144	0.75944	0.64117	0.8285	0.06077	0.06263	0.12699	0.1368	0.17221	0.54567	0.02067	0.22001
REACTOME_SIGNALING_BY_NOTCH3	0.326165	0.10657	0.12059	0.49134	0.01494	0.20858	0.38981	0.94965	0.52763	0.30372	0.39128	0.33533	0.81973	0.02478	0.17832	0.03222	0.22611	0.1676	0.65966	0.45847	0.28931	0.28644	0.21847	0.38032	0.48193	0.4236	0.18285	0.19579	0.5115	0.34345	0.75024	0.42598	0.68746	0.33643	0.48143	0.7251	0.26203	0.6901	0.2341	0.08773	0.65192	0.50761	0.25957	0.38769	0.41981	0.42781	0.40672	0.84191	0.60719
KEGG_CIRCADIAN_RHYTHM_MAMMAL	0.32629	0.29047	0.09606	0.142	0.3359	0.16726	0.25633	0.90188	0.69959	0.35472	0.53125	0.113	0.63227	0.27262	0.52175	0.21917	0.43672	0.76203	0.81309	0.95436	0.62778	0.50357	0.45443	0.0605	0.22853	0.75059	0.23918	0.53417	0.24025	0.61147	0.22496	0.33061	0.12011	0.41677	0.35762	0.18571	0.6856	0.60637	0.07677	0.07989	0.15422	0.25764	0.64362	0.21161	0.6034	0.4222	0.21302	0.08078	0.24145
BIOCARTA_ACTINY_PATHWAY	0.32659	0.73733	0.63846	0.7625	0.5292	0.55996	0.58812	0.5411	0.26266	0.75442	0.19418	0.70352	0.09057	0.38617	0.16194	0.23713	0.24934	0.06908	0.08655	0.33669	0.03302	0.13465	0.48066	0.63762	0.23728	0.50873	0.52353	0.62843	0.0601	0.12752	0.15194	0.13936	0.22141	0.83555	0.81771	0.79287	0.75294	0.62777	0.34647	0.22814	0.48618	0.63629	0.14425	0.28797	0.29784	0.6247	0.30515	0.42084	0.3278
REACTOME_FGFR4_LIGAND_BINDING_AND_ACTIVATION	0.327215	0.22233	0.10177	0.29265	0.09076	0.0473	0.02287	0.39737	0.05813	0.37794	0.39071	0.48484	0.14201	0.06554	0.11955	0.10833	0.0639	0.41593	0.89844	0.57767	0.46916	0.26517	0.64258	0.37882	0.47412	0.38997	0.73879	0.53132	0.42411	0.33624	0.47498	0.58493	0.34402	0.88447	0.71134	0.92557	0.5595	0.33025	0.02262	0.39846	0.15328	0.89735	0.80602	0.77412	0.83582	0.28746	0.0139	0.34743	0.18418
REACTOME_FORMATION_OF_THE_TERNARY_COMPLEX_AND_SUBSEQUENTLY_THE_43S_COMPLEX	0.32797	0.04511	0.07359	0.39552	0.001	0.39443	0.3312	0.44752	0.09762	0.12599	0.22819	0.15696	0.77883	0.02993	0.09189	0.43288	0.02585	0.87287	0.68551	0.58376	0.22999	0.67747	0.23165	0.14458	0.31928	0.88319	0.85736	0.76658	0.73717	0.59249	0.22241	0.21611	0.17996	0.30702	0.23865	0.38601	0.21838	0.27772	0.45956	0.19399	0.34986	0.55784	0.53549	0.38309	0.83897	0.15645	0.26133	0.11141	0.11748
REACTOME_SIGNALING_BY_NOTCH4	0.328665	0.14732	0.09182	0.55574	0.01113	0.15738	0.31453	0.95773	0.45682	0.38202	0.34715	0.33663	0.89805	0.01735	0.13157	0.02185	0.17447	0.13448	0.57198	0.37978	0.22948	0.25178	0.26461	0.35717	0.49011	0.52235	0.15902	0.27941	0.51341	0.26925	0.72677	0.34308	0.61692	0.29642	0.41657	0.64917	0.20461	0.625	0.24372	0.07589	0.61518	0.45455	0.22103	0.32943	0.39099	0.34626	0.38234	0.78016	0.53138
REACTOME_REMOVAL_OF_THE_FLAP_INTERMEDIATE_FROM_THE_C_STRAND	0.32941	0.19907	0.73486	0.41452	0.31218	0.23856	0.46019	0.32736	0.22006	0.53417	0.34805	0.32062	0.2367	0.04822	0.5589	0.07271	0.16176	0.00318	0.01397	0.00948	0.01141	0.04588	0.04668	0.13881	0.03399	0.41438	0.75081	0.57338	0.83818	0.01138	0.10081	0.01071	0.07805	0.22451	0.08821	0.05457	0.49149	0.47912	0.85329	0.55061	0.96078	0.04646	0.02306	0.07942	0.014	0.52986	0.76077	0.34484	0.76157
REACTOME_DESTABILIZATION_OF_MRNA_BY_KSRP	0.32965	0.54242	0.40647	0.52215	0.22565	0.62014	0.49611	0.56672	0.86134	0.21156	0.31922	0.52162	0.83106	0.61878	0.47506	0.46426	0.7015	0.94639	0.29893	0.15928	0.50471	0.90708	0.28703	0.35703	0.57774	0.35291	0.08137	0.16019	0.23683	0.76363	0.41485	0.15273	0.68341	0.05741	0.08941	0.28047	0.06726	0.50669	0.39581	0.33934	0.52704	0.08079	0.10943	0.23688	0.02542	0.14336	0.50878	0.57013	0.64029
REACTOME_HYALURONAN_UPTAKE_AND_DEGRADATION	0.32975	0.28624	0.49539	0.11487	0.29668	0.28413	0.11901	0.09739	0.15003	0.02711	0.07943	0.0158	0.74313	0.24913	0.14737	0.71136	0.19007	0.84392	0.41903	0.45615	0.07615	0.26069	0.07117	0.12752	0.02246	0.9232	0.96144	0.87162	0.8666	0.12405	0.02905	0.02114	0.05938	0.00374	0.00949	0.00477	0.04345	0.0417	0.13111	0.64999	0.21291	0.00494	0.07335	0.04574	0.07896	0.52327	0.22314	0.7814	0.32158
REACTOME_IL_2_SIGNALING	0.33017	0.66379	0.74746	0.22481	0.8306	0.7682	0.08377	0.01952	0.19081	0.14979	0.26926	0.0866	0.78015	0.94892	0.49564	0.93966	0.47576	0.86388	0.07576	0.33773	0.18995	0.04402	0.01624	0.06248	0.04343	0.43973	0.29742	0.46242	0.1227	0.20928	0.10898	0.05028	0.1444	0.03131	0.06203	0.02572	0.15552	0.04988	0.12301	0.41536	0.08773	0.03519	0.33436	0.18615	0.3178	0.47834	0.57288	0.29212	0.76759
BIOCARTA_ACE2_PATHWAY	0.33094	0.21317	0.24017	0.59583	0.2468	0.21243	0.15044	0.16027	0.78695	0.39905	0.45518	0.53054	0.48629	0.34653	0.47839	0.30124	0.52551	0.39656	0.71794	0.28622	0.85514	0.09025	0.13552	0.25436	0.49419	0.36153	0.7189	0.35077	0.91198	0.70913	0.55516	0.26932	0.84257	0.47966	0.3342	0.25942	0.76155	0.28176	0.41601	0.14546	0.43555	0.24318	0.24165	0.18611	0.54306	0.85195	0.57837	0.16815	0.7411
REACTOME_SYNTHESIS_OF_PA	0.33146	0.19221	0.39767	0.13362	0.74837	0.70259	0.68282	0.42195	0.83834	0.1029	0.31059	0.19116	0.01416	0.91641	0.9261	0.77485	0.88969	0.15235	0.14321	0.08346	0.49239	0.51158	0.08103	0.21959	0.16089	0.1885	0.31078	0.79365	0.17263	0.78985	0.36087	0.10289	0.66659	0.32658	0.40026	0.55888	0.28067	0.47039	0.72555	0.88006	0.34491	0.54411	0.81258	0.61083	0.63689	0.66638	0.31896	0.38568	0.87804
REACTOME_SIGNALING_BY_FGFR	0.331545	0.65397	0.70228	0.59227	0.64357	0.90872	0.62498	0.28394	0.42014	0.12246	0.05785	0.0368	0.80692	0.92833	0.8272	0.9844	0.52643	0.81557	0.44486	0.70079	0.38598	0.27483	0.02179	0.07778	0.09324	0.54842	0.68	0.56037	0.48556	0.32418	0.18997	0.10321	0.2484	0.03708	0.03491	0.08865	0.06283	0.40047	0.11844	0.42874	0.42339	0.01701	0.04495	0.05872	0.03281	0.66215	0.85946	0.96498	0.62175
REACTOME_INHIBITION_OF_INSULIN_SECRETION_BY_ADRENALINE_NORADRENALINE	0.331845	0.00351	0.61182	0.49513	0.01583	0.20792	0.5966	0.58679	0.35501	0.2008	0.70398	0.58495	0.07339	0.04304	0.50738	0.27372	0.23606	0.0138	0.21581	0.29561	0.23356	0.39757	0.01838	0.17833	0.29398	0.02052	0.59526	0.33187	0.11245	0.38934	0.39087	0.36039	0.40371	0.12765	0.61153	0.33218	0.3736	0.41778	0.3068	0.09066	0.62377	0.26294	0.26225	0.39065	0.22503	0.63216	0.73785	0.46636	0.67475
REACTOME_COMMON_PATHWAY	0.333375	0.59526	0.18904	0.1739	0.61097	0.11129	0.08972	0.07983	0.16178	0.41117	0.4613	0.40658	0.3867	0.61086	0.16451	0.20981	0.5652	0.41571	0.38908	0.2307	0.15868	0.09844	0.23837	0.18133	0.18645	0.15952	0.11749	0.09729	0.14855	0.19485	0.13774	0.09729	0.24295	0.48788	0.62097	0.58711	0.47537	0.52229	0.76248	0.91537	0.56391	0.63037	0.71923	0.86457	0.49729	0.06044	0.46265	0.27536	0.33668
BIOCARTA_RAS_PATHWAY	0.333835	0.84596	0.98545	0.95651	0.91354	0.88275	0.13045	0.23213	0.36119	0.77466	0.44185	0.29225	0.35284	0.6813	0.42337	0.56157	0.43639	0.61021	0.14686	0.40069	0.34808	0.19181	0.35258	0.43871	0.62423	0.42581	0.63802	0.30017	0.42077	0.39469	0.39555	0.53653	0.38499	0.42603	0.13541	0.11818	0.16891	0.04137	0.00885	0.00533	0.02253	0.07724	0.01755	0.00868	0.04722	0.59192	0.04619	0.16845	0.1483
REACTOME_TRANSPORT_OF_VITAMINS_NUCLEOSIDES_AND_RELATED_MOLECULES	0.334125	0.1817	0.85406	0.29715	0.45655	0.8258	0.73245	0.80483	0.33484	0.34926	0.80364	0.59263	0.41625	0.68999	0.30797	0.78399	0.19814	0.72851	0.91052	0.59741	0.93332	0.91606	0.22348	0.12593	0.20298	0.00403	0.08997	0.01413	0.01011	0.6721	0.16537	0.63972	0.12898	0.40453	0.92197	0.39154	0.68996	0.98116	0.98535	0.87401	0.76097	0.48718	0.91507	0.6646	0.67422	0.77577	0.65757	0.79036	0.15788
REACTOME_PREFOLDIN_MEDIATED_TRANSFER_OF_SUBSTRATE_TO_CCT_TRIC	0.33449	0.60694	0.66909	0.82714	0.26139	0.74133	0.9083	0.1097	0.8601	0.66945	0.93832	0.86664	0.14018	0.58295	0.79732	0.43978	0.57943	0.42775	0.31753	0.26165	0.60896	0.87462	0.29927	0.23111	0.75775	0.11778	0.25004	0.11996	0.10626	0.77651	0.62965	0.51329	0.57398	0.40861	0.76524	0.55841	0.35202	0.07766	0.37671	0.17281	0.44484	0.58034	0.64189	0.55562	0.72077	0.50205	0.87543	0.17144	0.8273
REACTOME_NONSENSE_MEDIATED_DECAY_ENHANCED_BY_THE_EXON_JUNCTION_COMPLEX	0.335285	0.04591	0.08728	0.21152	0.01288	0.23388	0.39229	0.40934	0.39019	0.15179	0.41786	0.09048	0.80217	0.16013	0.43099	0.43657	0.17419	0.50916	0.40406	0.5192	0.15052	0.46486	0.09619	0.08972	0.1653	0.72704	0.2179	0.49105	0.39857	0.41332	0.14132	0.09927	0.20361	0.02192	0.04365	0.14445	0.08787	0.19236	0.25941	0.2666	0.44414	0.21364	0.46711	0.32753	0.35007	0.11334	0.27419	0.04606	0.23614
KEGG_COLORECTAL_CANCER	0.33545	0.48404	0.42013	0.51465	0.12324	0.72916	0.78445	0.51798	0.90383	0.2537	0.88207	0.18913	0.59002	0.50987	0.74854	0.64881	0.51084	0.80729	0.15013	0.34041	0.93323	0.6825	0.04418	0.52135	0.90532	0.67386	0.36104	0.85804	0.0997	0.98779	0.97774	0.6008	0.98809	0.01148	0.04511	0.02877	0.03016	0.04423	0.03382	0.01437	0.10834	0.16852	0.5944	0.13411	0.23335	0.17764	0.39987	0.03042	0.84916
KEGG_CHEMOKINE_SIGNALING_PATHWAY	0.33632	0.52669	0.45508	0.59886	0.36404	0.27271	0.13955	0.85898	0.68776	0.32122	0.46521	0.2725	0.84871	0.35293	0.61593	0.34247	0.71886	0.33836	0.32919	0.26421	0.85373	0.323	0.08289	0.48366	0.86988	0.75047	0.50229	0.41689	0.63853	0.76737	0.95521	0.93239	0.95321	0.09469	0.01996	0.16281	0.02014	0.02649	0.02821	0.104	0.12139	0.07097	0.07817	0.16938	0.15855	0.14124	0.21609	0.07941	0.59456
BIOCARTA_SARS_PATHWAY	0.337725	0.94139	0.99738	0.63015	0.96818	0.80539	0.05458	0.18392	0.14808	0.59079	0.69736	0.10921	0.12331	0.62617	0.09655	0.75637	0.25184	0.75419	0.47817	0.91665	0.08687	0.18019	0.33689	0.81962	0.17768	0.18215	0.49678	0.18834	0.25272	0.16408	0.10891	0.30666	0.19745	0.55521	0.39157	0.04239	0.92089	0.08153	0.03373	0.11383	0.37725	0.06226	0.05861	0.00945	0.09907	0.53393	0.17572	0.03091	0.72904
KEGG_SNARE_INTERACTIONS_IN_VESICULAR_TRANSPORT	0.33844	0.56705	0.69902	0.93573	0.53091	0.37139	0.12909	0.70069	0.48601	0.71061	0.52037	0.87209	0.69761	0.44004	0.41914	0.50134	0.36336	0.21255	0.13713	0.02793	0.7174	0.73561	0.91147	0.8554	0.93463	0.12736	0.30719	0.07162	0.70387	0.43097	0.79657	0.64114	0.75485	0.64909	0.49522	0.91601	0.32521	0.33262	0.09489	0.70128	0.23584	0.73582	0.23052	0.55873	0.22008	0.27846	0.13472	0.22248	0.29068
KEGG_GRAFT_VERSUS_HOST_DISEASE	0.33865	0.89404	0.90885	0.55902	0.38976	0.94581	0.39094	0.04146	0.11571	0.66658	0.59904	0.66806	0.375	0.75741	0.12785	0.94028	0.04836	0.72723	0.12374	0.08045	0.41453	0.15785	0.18411	0.08385	0.0888	0.56104	0.95885	0.84665	0.79368	0.47688	0.04648	0.1784	0.05475	0.48846	0.48944	0.47605	0.2873	0.54215	0.42475	0.22756	0.01834	0.33651	0.55714	0.63222	0.42548	0.74665	0.08663	0.65325	0.01966
KEGG_VASOPRESSIN_REGULATED_WATER_REABSORPTION	0.338775	0.08076	0.14813	0.27017	0.10499	0.58082	0.71906	0.98356	0.91931	0.16776	0.12352	0.15189	0.5274	0.28719	0.86572	0.30036	0.65692	0.50341	0.51155	0.23348	0.91575	0.7228	0.50004	0.73587	0.95727	0.75725	0.33947	0.0278	0.50939	0.93523	0.99225	0.91701	0.9877	0.17478	0.39235	0.74127	0.04892	0.46664	0.81159	0.3375	0.76042	0.33808	0.40205	0.4384	0.37329	0.12089	0.70763	0.95958	0.30757
KEGG_AUTOIMMUNE_THYROID_DISEASE	0.3388	0.36762	0.81102	0.6483	0.36963	0.9564	0.70201	0.6353	0.40661	0.42007	0.27848	0.84356	0.33225	0.71699	0.53397	0.93514	0.22602	0.86068	0.52783	0.52462	0.5789	0.19344	0.12797	0.1403	0.12177	0.22596	0.75915	0.84502	0.65642	0.55598	0.15105	0.22964	0.20011	0.50637	0.65239	0.87878	0.43138	0.57767	0.6641	0.27381	0.06453	0.61061	0.52052	0.8558	0.33657	0.69891	0.41741	0.83649	0.10816
BIOCARTA_NUCLEARRS_PATHWAY	0.338905	0.34311	0.18134	0.16182	0.09333	0.33914	0.91392	0.20263	0.2402	0.05197	0.12086	0.0076	0.83281	0.14838	0.53733	0.36059	0.32611	0.2647	0.26685	0.44006	0.08094	0.95787	0.70006	0.64339	0.44789	0.6695	0.74156	0.57094	0.85413	0.20468	0.72778	0.55881	0.47815	0.1488	0.10306	0.09119	0.16489	0.78967	0.42524	0.23555	0.91284	0.09027	0.0688	0.01878	0.16528	0.29917	0.96601	0.81371	0.74932
KEGG_PROGESTERONE_MEDIATED_OOCYTE_MATURATION	0.33937	0.81638	0.3014	0.66904	0.28661	0.2238	0.29218	0.38782	0.54026	0.29688	0.31277	0.26752	0.96826	0.35767	0.5623	0.13878	0.87494	0.87062	0.20582	0.53595	0.77344	0.38103	0.0984	0.79882	0.89363	0.56322	0.34948	0.34056	0.44471	0.57447	0.92061	0.55988	0.95527	0.02601	0.06449	0.15552	0.02624	0.15287	0.10037	0.20327	0.33531	0.08616	0.23028	0.28136	0.14544	0.05341	0.62707	0.61151	0.79824
REACTOME_CTNNB1_PHOSPHORYLATION_CASCADE	0.34069	0.31802	0.19911	0.25457	0.2334	0.27581	0.09219	0.28807	0.12512	0.03495	0.17782	0.00754	0.46927	0.32108	0.01747	0.43139	0.27762	0.74323	0.31411	0.52761	0.13459	0.35369	0.25445	0.10334	0.09786	0.13155	0.70435	0.27201	0.98801	0.1357	0.08473	0.12461	0.08251	0.03111	0.04223	0.05572	0.12329	0.07626	0.33355	0.21438	0.28613	0.0111	0.06346	0.00957	0.04771	0.1952	0.26378	0.26083	0.24092
REACTOME_EFFECTS_OF_PIP2_HYDROLYSIS	0.34074	0.15076	0.45259	0.05024	0.68953	0.26147	0.28712	0.94737	0.39639	0.00826	0.11174	0.00829	0.27532	0.42713	0.48749	0.27034	0.685	0.21836	0.4335	0.72431	0.12668	0.17164	0.27592	0.52279	0.04673	0.06684	0.2219	0.0558	0.13529	0.13704	0.11703	0.06504	0.27072	0.00488	0.02282	0.00347	0.07301	0.07285	0.42205	0.27747	0.4561	0.00066	0.00115	0.00212	0.000137	0.31375	0.28235	0.40449	0.60224
KEGG_ENDOMETRIAL_CANCER	0.34132	0.46967	0.54345	0.69531	0.37473	0.56904	0.12104	0.16314	0.58553	0.33055	0.82907	0.42177	0.30741	0.40974	0.27628	0.24362	0.47867	0.71121	0.28951	0.54251	0.88655	0.44741	0.04935	0.25961	0.75283	0.64805	0.28357	0.84165	0.38736	0.62021	0.44671	0.46263	0.69528	0.16444	0.0713	0.09395	0.08333	0.01084	0.00602	0.01047	0.0138	0.51912	0.69858	0.42241	0.79301	0.19325	0.1564	0.02166	0.54057
REACTOME_ENDOSOMAL_SORTING_COMPLEX_REQUIRED_FOR_TRANSPORT_ESCRT	0.34168	0.06148	0.14753	0.07897	0.28674	0.09793	0.03582	0.32767	0.05143	0.09426	0.7542	0.23769	0.03733	0.19573	0.02153	0.11022	0.12789	0.1699	0.21307	0.12435	0.29783	0.13487	0.26935	0.29684	0.11509	0.03626	0.4101	0.41059	0.21577	0.36681	0.09593	0.2622	0.13954	0.11109	0.16782	0.26663	0.28793	0.44475	0.51379	0.95562	0.24776	0.20638	0.69692	0.64618	0.53124	0.60195	0.11293	0.611	0.26231
BIOCARTA_PS1_PATHWAY	0.341735	0.46287	0.13242	0.48518	0.04253	0.41731	0.53904	0.72194	0.80627	0.12552	0.73189	0.14027	0.48124	0.17092	0.24108	0.57225	0.2011	0.96295	0.88655	0.69907	0.85322	0.62495	0.17393	0.55981	0.8352	0.27195	0.3728	0.40937	0.53896	0.83902	0.8432	0.79429	0.84733	0.04428	0.02355	0.03324	0.08517	0.07359	0.01272	0.15231	0.63225	0.07005	0.17477	0.0916	0.13269	0.34578	0.53308	0.08834	0.6268
REACTOME_LIGAND_GATED_ION_CHANNEL_TRANSPORT	0.34207	0.65923	0.27711	0.98152	0.05219	0.15841	0.18564	0.9499	0.38715	0.83797	0.66343	0.85881	0.59324	0.14329	0.15243	0.31205	0.21382	0.41267	0.8882	0.6666	0.64409	0.44041	0.51152	0.69975	0.83369	0.19171	0.36351	0.3732	0.67885	0.5003	0.60577	0.69084	0.84609	0.85708	0.8328	0.99699	0.28841	0.91318	0.21165	0.49745	0.42454	0.99392	0.7132	0.88003	0.95733	0.07309	0.20827	0.86977	0.20519
KEGG_ACUTE_MYELOID_LEUKEMIA	0.34208	0.68421	0.81344	0.60041	0.54468	0.64852	0.07813	0.21717	0.17732	0.35911	0.89249	0.22602	0.85246	0.38682	0.38827	0.14281	0.34236	0.64652	0.17002	0.6496	0.41932	0.16937	0.07544	0.4112	0.758	0.36929	0.52917	0.62441	0.10066	0.44802	0.75559	0.40079	0.73126	0.41237	0.47251	0.15898	0.56372	0.47819	0.02451	0.07838	0.1461	0.37734	0.29026	0.23239	0.4344	0.59417	0.57507	0.30596	0.86038
KEGG_TASTE_TRANSDUCTION	0.343075	0.57549	0.66709	0.59227	0.33992	0.58809	0.42082	0.95611	0.48315	0.0783	0.16945	0.04602	0.54016	0.64654	0.34065	0.71861	0.26261	0.93541	0.58044	0.51722	0.92121	0.54935	0.46259	0.8444	0.80731	0.26824	0.61761	0.31388	0.44918	0.73933	0.89046	0.7011	0.87581	0.01041	0.09322	0.17077	0.01155	0.28608	0.61891	0.43501	0.38518	0.02117	0.11724	0.2409	0.02546	0.06089	0.46048	0.6888	0.19596
BIOCARTA_PAR1_PATHWAY	0.34426	0.65296	0.36657	0.60657	0.56121	0.63125	0.19728	0.55758	0.58801	0.51405	0.20716	0.17827	0.39969	0.43735	0.2153	0.1796	0.47609	0.85133	0.2517	0.23407	0.86747	0.96371	0.73461	0.86233	0.9142	0.17161	0.27799	0.08826	0.14342	0.81603	0.7437	0.73773	0.74359	0.16624	0.1041	0.06865	0.08402	0.29346	0.05039	0.14179	0.22341	0.02354	0.03574	0.04743	0.03039	0.4732	0.30944	0.86163	0.38764
KEGG_GNRH_SIGNALING_PATHWAY	0.345065	0.36659	0.45912	0.16162	0.8803	0.78292	0.50303	0.48433	0.57736	0.02021	0.01027	0.01568	0.29907	0.97532	0.76776	0.94356	0.92817	0.87094	0.18872	0.48237	0.53097	0.44295	0.17631	0.1905	0.18589	0.12138	0.31256	0.20298	0.28374	0.47511	0.15975	0.10265	0.47427	0.00242	0.00717	0.03721	0.03286	0.17838	0.88738	0.92648	0.39539	0.00504	0.36954	0.23239	0.08426	0.30355	0.65427	0.94045	0.68353
REACTOME_SIGNALING_BY_FGFR_IN_DISEASE	0.34529	0.63483	0.52215	0.53454	0.59819	0.84789	0.38354	0.24652	0.26992	0.11016	0.04314	0.02853	0.83854	0.88448	0.62387	0.9651	0.46081	0.88572	0.50787	0.7894	0.36315	0.21403	0.0214	0.06956	0.07928	0.38309	0.42755	0.37908	0.23254	0.27667	0.13356	0.07969	0.224	0.03133	0.02813	0.08793	0.0354	0.2905	0.08473	0.48349	0.22718	0.01298	0.0518	0.0596	0.0309	0.41675	0.5883	0.91858	0.48566
REACTOME_GASTRIN_CREB_SIGNALLING_PATHWAY_VIA_PKC_AND_MAPK	0.34573	0.18982	0.5515	0.20984	0.50173	0.54983	0.78776	0.86665	0.6279	0.15841	0.46741	0.24571	0.63983	0.32998	0.7696	0.57246	0.43921	0.24912	0.64441	0.47281	0.51009	0.60583	0.14816	0.36289	0.33761	0.39343	0.75197	0.33822	0.88544	0.51	0.47669	0.63764	0.57593	0.22163	0.41629	0.20639	0.30662	0.47043	0.17559	0.31713	0.5033	0.12478	0.06694	0.11387	0.05744	0.84029	0.81956	0.90184	0.71933
REACTOME_POST_CHAPERONIN_TUBULIN_FOLDING_PATHWAY	0.3458	0.23489	0.60474	0.60853	0.16522	0.58477	0.93994	0.37965	0.63787	0.55332	0.90126	0.79306	0.26847	0.30161	0.68366	0.38701	0.27091	0.26686	0.33221	0.2748	0.37591	0.95764	0.74597	0.35461	0.86764	0.1841	0.45427	0.21838	0.18677	0.79297	0.63311	0.76725	0.56492	0.55356	0.91614	0.71971	0.63566	0.92268	0.84284	0.70068	0.94598	0.87207	0.93479	0.88999	0.94012	0.68787	0.93708	0.49867	0.76193
REACTOME_PLATELET_ACTIVATION_SIGNALING_AND_AGGREGATION	0.34686	0.08907	0.71707	0.31063	0.46641	0.39922	0.40481	0.87813	0.37076	0.09866	0.20883	0.13746	0.05695	0.40645	0.37184	0.55841	0.56485	0.15186	0.73215	0.60994	0.27934	0.30474	0.45435	0.58568	0.19283	0.00837	0.13771	0.00472	0.09124	0.17729	0.21346	0.36128	0.36528	0.0096	0.00457	0.00488	0.02609	0.04435	0.32517	0.25451	0.26018	0.00532	0.03967	0.07011	0.01797	0.04663	0.12911	0.12937	0.49266
BIOCARTA_AMI_PATHWAY	0.34717	0.12844	0.13799	0.07529	0.22157	0.20805	0.56152	0.15261	0.43387	0.10843	0.27283	0.08975	0.3356	0.45502	0.76381	0.56294	0.54274	0.53554	0.59454	0.63941	0.30232	0.10988	0.0838	0.14068	0.18728	0.34343	0.5478	0.09317	0.42354	0.34745	0.21033	0.09231	0.34149	0.11751	0.33766	0.03436	0.66395	0.28537	0.79204	0.28253	0.89277	0.1049	0.30585	0.14084	0.14596	0.55343	0.85058	0.39802	0.79079
KEGG_GAP_JUNCTION	0.34762	0.50181	0.58668	0.50081	0.62736	0.75189	0.56839	0.50869	0.48298	0.09257	0.12589	0.15063	0.57365	0.82004	0.53993	0.86956	0.77555	0.68521	0.72175	0.5915	0.69101	0.90649	0.4695	0.31484	0.59632	0.2396	0.27203	0.10176	0.32951	0.57307	0.34616	0.4968	0.36108	0.01866	0.05538	0.17746	0.02316	0.476	0.7259	0.68057	0.33124	0.024	0.1742	0.23501	0.10769	0.20633	0.33076	0.77453	0.42663
BIOCARTA_RAC1_PATHWAY	0.34825	0.30242	0.51249	0.56563	0.49192	0.35009	0.10369	0.01531	0.13853	0.57811	0.50618	0.74922	0.18298	0.48854	0.15028	0.50515	0.26502	0.37555	0.14294	0.39493	0.14111	0.09904	0.03695	0.02941	0.08697	0.75888	0.88076	0.80306	0.26801	0.27185	0.03413	0.10532	0.11379	0.78741	0.83411	0.87223	0.82255	0.32299	0.09225	0.28786	0.12389	0.78644	0.75642	0.75454	0.8315	0.81165	0.41386	0.7254	0.37886
REACTOME_NUCLEOTIDE_LIKE_PURINERGIC_RECEPTORS	0.348935	0.41207	0.93154	0.67834	0.33938	0.71575	0.2703	0.52672	0.09657	0.27828	0.54297	0.80285	0.4544	0.61519	0.49778	0.81225	0.06024	0.59835	0.20703	0.08218	0.38993	0.04653	0.02509	0.33039	0.04981	0.95707	0.85843	0.72165	0.89225	0.36337	0.09538	0.17211	0.11732	0.25595	0.47322	0.74455	0.15628	0.48521	0.32365	0.73217	0.08475	0.49682	0.77426	0.94066	0.3953	0.75492	0.56165	0.68918	0.078
REACTOME_GLUCONEOGENESIS	0.349	0.4795	0.11591	0.6013	0.01573	0.03102	0.26944	0.79915	0.30183	0.35785	0.73799	0.25597	0.79519	0.01148	0.08165	0.08516	0.12656	0.89531	0.60705	0.73035	0.75732	0.52769	0.7149	0.90898	0.96015	0.4561	0.14567	0.11662	0.38561	0.53072	0.8277	0.85727	0.88657	0.17196	0.43232	0.19712	0.13707	0.07377	0.80857	0.56513	0.96678	0.30275	0.48695	0.25184	0.53128	0.05831	0.87973	0.75483	0.508
BIOCARTA_UCALPAIN_PATHWAY	0.34921	0.3178	0.66594	0.24071	0.71867	0.66298	0.83595	0.35096	0.87518	0.18533	0.02981	0.09554	0.04382	0.4503	0.79997	0.31921	0.68184	0.03668	0.20298	0.2063	0.39539	0.18169	0.56876	0.20036	0.23218	0.06631	0.29075	0.14887	0.09333	0.16335	0.17425	0.11865	0.38075	0.32772	0.39333	0.39982	0.80916	0.53491	0.78339	0.36089	0.47586	0.10478	0.13904	0.18916	0.07427	0.78488	0.34333	0.85762	0.37613
REACTOME_NGF_SIGNALLING_VIA_TRKA_FROM_THE_PLASMA_MEMBRANE	0.3495	0.8933	0.80155	0.57214	0.87128	0.95887	0.76285	0.1855	0.32609	0.12166	0.07174	0.07843	0.79205	0.97172	0.67487	0.98199	0.70766	0.66223	0.11817	0.28699	0.30323	0.26417	0.03073	0.06305	0.13376	0.24674	0.72146	0.34585	0.68887	0.19832	0.15634	0.07494	0.17864	0.00537	0.00856	0.03699	0.01453	0.13086	0.16606	0.27522	0.07769	0.00105	0.03431	0.03271	0.00717	0.34417	0.59116	0.93869	0.36572
KEGG_PANCREATIC_CANCER	0.34957	0.72803	0.94236	0.85339	0.94642	0.97129	0.37853	0.19496	0.61593	0.49054	0.2994	0.39169	0.20549	0.92017	0.73423	0.84472	0.85265	0.45957	0.08359	0.16537	0.35499	0.23171	0.12579	0.27865	0.53998	0.25099	0.64472	0.43454	0.06521	0.63583	0.45641	0.14644	0.59909	0.09479	0.01662	0.02856	0.05293	0.01481	0.00659	0.01093	0.01971	0.03563	0.02007	0.01993	0.03537	0.5599	0.11945	0.12288	0.50544
REACTOME_METABOLISM_OF_NON_CODING_RNA	0.34992	0.25313	0.18324	0.15679	0.18613	0.29742	0.26742	0.49819	0.82244	0.08785	0.25998	0.06593	0.98903	0.20377	0.49749	0.18502	0.68041	0.54506	0.28874	0.39715	0.53554	0.34878	0.05122	0.15272	0.24104	0.63242	0.50666	0.75481	0.69885	0.34601	0.448	0.05605	0.8176	0.0045	0.07127	0.03402	0.24592	0.14715	0.80736	0.37115	0.74065	0.01105	0.11813	0.19626	0.00785	0.31715	0.69631	0.7868	0.95744
KEGG_STEROID_HORMONE_BIOSYNTHESIS	0.35002	0.60183	0.52233	0.16053	0.61977	0.31941	0.50301	0.49019	0.0823	0.18602	0.00814	0.03209	0.83057	0.14687	0.21623	0.08838	0.09112	0.06433	0.0487	0.10196	0.019	0.17203	0.66421	0.5781	0.08844	0.64054	0.93158	0.71143	0.83831	0.02206	0.14865	0.05422	0.05128	0.03611	0.03148	0.01125	0.25511	0.66473	0.87943	0.36513	0.78203	0.00476	0.00659	0.00957	0.00668	0.65271	0.48242	0.57705	0.20782
KEGG_SYSTEMIC_LUPUS_ERYTHEMATOSUS	0.350585	0.54328	0.75526	0.67897	0.70017	0.39218	0.21427	0.71069	0.25755	0.60494	0.58951	0.47226	0.02294	0.11761	0.32819	0.14397	0.56266	0.12524	0.25068	0.46233	0.24177	0.34452	0.35114	0.29436	0.26153	0.1449	0.34434	0.27794	0.40608	0.08305	0.143	0.08123	0.26888	0.17393	0.47235	0.22904	0.29239	0.08857	0.36595	0.10191	0.32122	0.06563	0.02804	0.11459	0.02787	0.18702	0.24004	0.62623	0.5003
REACTOME_ION_CHANNEL_TRANSPORT	0.350725	0.45953	0.4835	0.67677	0.27885	0.22268	0.15433	0.97031	0.28065	0.57586	0.24232	0.48674	0.358	0.23847	0.23732	0.66661	0.28559	0.44515	0.82885	0.90886	0.31693	0.03575	0.02585	0.48644	0.22002	0.07211	0.42786	0.07691	0.31812	0.16003	0.31471	0.52128	0.35184	0.67778	0.74928	0.55567	0.66005	0.42463	0.39558	0.22816	0.72193	0.80207	0.51917	0.39353	0.83038	0.28257	0.69927	0.57867	0.42837
KEGG_GLYCOSAMINOGLYCAN_BIOSYNTHESIS_KERATAN_SULFATE	0.3513	0.81367	0.69906	0.85466	0.82287	0.76986	0.06294	0.46616	0.34813	0.75591	0.34368	0.77946	0.81982	0.84758	0.37743	0.65538	0.71587	0.25151	0.01736	0.03423	0.55417	0.12531	0.30334	0.25699	0.28363	0.64964	0.42466	0.63942	0.58881	0.50619	0.22325	0.15992	0.32437	0.2773	0.18669	0.34511	0.32225	0.34235	0.25527	0.68173	0.07218	0.24948	0.26286	0.58355	0.07597	0.6876	0.05262	0.29073	0.197
REACTOME_NOTCH_HLH_TRANSCRIPTION_PATHWAY	0.351495	0.17648	0.41089	0.03715	0.82054	0.43042	0.68006	0.03946	0.28788	0.12178	0.07018	0.09593	0.06501	0.57837	0.3657	0.38602	0.39034	0.02034	0.12388	0.25908	0.03962	0.52511	0.55314	0.32266	0.10348	0.37397	0.95873	0.48471	0.48211	0.22735	0.07239	0.17699	0.10682	0.25194	0.25437	0.06413	0.32034	0.74391	0.78003	0.65089	0.65686	0.08322	0.22794	0.06509	0.12296	0.86981	0.45057	0.35538	0.39224
BIOCARTA_ECM_PATHWAY	0.351635	0.42207	0.86811	0.7725	0.76282	0.60664	0.01797	0.05462	0.23315	0.50522	0.44137	0.44979	0.2501	0.66237	0.2822	0.57687	0.42797	0.6384	0.53021	0.45809	0.70194	0.12115	0.10411	0.05005	0.18616	0.25502	0.41609	0.08794	0.1746	0.39303	0.08123	0.26455	0.24352	0.43019	0.53889	0.7377	0.39212	0.03621	0.04108	0.24332	0.01163	0.23978	0.34255	0.47334	0.4184	0.34993	0.03112	0.59317	0.11398
BIOCARTA_TEL_PATHWAY	0.35217	0.70333	0.33353	0.90983	0.34944	0.35364	0.07036	0.60134	0.17586	0.61271	0.3836	0.62148	0.15179	0.24752	0.07175	0.20411	0.19262	0.57868	0.16714	0.70813	0.14239	0.45963	0.1807	0.46337	0.37919	0.14302	0.74051	0.11501	0.30044	0.14992	0.29143	0.13973	0.42903	0.57863	0.45833	0.71776	0.52723	0.55114	0.10341	0.32716	0.3483	0.63704	0.46713	0.47433	0.47176	0.36652	0.34024	0.75344	0.60821
REACTOME_PPARA_ACTIVATES_GENE_EXPRESSION	0.352215	0.10796	0.16514	0.08534	0.45789	0.08384	0.53916	0.73747	0.65103	0.41598	0.73582	0.4787	0.1251	0.1744	0.65502	0.03494	0.52567	0.01054	0.30278	0.10585	0.39109	0.20437	0.62926	0.47294	0.67026	0.12607	0.08624	0.44671	0.15311	0.44564	0.90284	0.74928	0.49569	0.23324	0.07262	0.06352	0.23761	0.76291	0.24003	0.72806	0.65775	0.17575	0.17869	0.32486	0.068	0.21894	0.51562	0.02624	0.43666
KEGG_BIOSYNTHESIS_OF_UNSATURATED_FATTY_ACIDS	0.352255	0.4811	0.92556	0.60308	0.49143	0.80189	0.66644	0.95119	0.5238	0.32411	0.1973	0.25147	0.27068	0.28424	0.58687	0.70064	0.21687	0.69067	0.82883	0.39123	0.33559	0.33274	0.32686	0.53586	0.32749	0.26401	0.23377	0.55765	0.06123	0.28161	0.52625	0.36413	0.25901	0.56134	0.4141	0.31929	0.42065	0.35244	0.86494	0.284	0.43799	0.38774	0.4008	0.42056	0.41963	0.66548	0.75725	0.66719	0.43152
REACTOME_DOWNSTREAM_SIGNAL_TRANSDUCTION	0.352405	0.6141	0.47004	0.52072	0.38847	0.66151	0.69177	0.26867	0.4275	0.0905	0.09308	0.08068	0.96969	0.77645	0.56835	0.9357	0.686	0.83617	0.39879	0.36807	0.67405	0.22074	0.04271	0.19481	0.26576	0.58397	0.59626	0.52279	0.66214	0.33735	0.31728	0.22192	0.50638	0.00256	0.00784	0.03801	0.00868	0.33484	0.33308	0.29666	0.2727	0.0051	0.06793	0.10279	0.02269	0.24661	0.90374	0.94407	0.62196
REACTOME_ASSOCIATION_OF_TRIC_CCT_WITH_TARGET_PROTEINS_DURING_BIOSYNTHESIS	0.352785	0.32177	0.84856	0.49624	0.73887	0.84379	0.73067	0.54824	0.79902	0.23254	0.73954	0.50046	0.11017	0.72345	0.83251	0.90043	0.53248	0.62935	0.42205	0.37864	0.92581	0.84607	0.22389	0.56744	0.88602	0.22044	0.55375	0.61727	0.64649	0.78055	0.68156	0.76502	0.60404	0.08419	0.17508	0.07582	0.14162	0.02945	0.01814	0.11253	0.08515	0.10504	0.19076	0.21121	0.35171	0.52294	0.25938	0.2725	0.34974
BIOCARTA_SPRY_PATHWAY	0.35288	0.16974	0.3071	0.57781	0.40764	0.14075	0.07216	0.06837	0.02226	0.53045	0.62835	0.82117	0.18463	0.27761	0.11907	0.5946	0.14817	0.09862	0.72661	0.62989	0.20204	0.14683	0.293	0.02566	0.13191	0.50636	0.46461	0.32858	0.4066	0.04156	0.02717	0.24267	0.02238	0.60147	0.17575	0.40666	0.16804	0.18992	0.70469	0.46472	0.0138	0.75305	0.6106	0.69386	0.72389	0.18122	0.21725	0.40793	0.05385
REACTOME_RECEPTOR_LIGAND_BINDING_INITIATES_THE_SECOND_PROTEOLYTIC_CLEAVAGE_OF_NOTCH_RECEPTOR	0.35338	0.03289	0.06697	0.11816	0.03731	0.18411	0.80374	0.42647	0.77995	0.07224	0.10984	0.12161	0.68155	0.0888	0.65745	0.07933	0.48379	0.21367	0.80017	0.56022	0.46906	0.60675	0.29402	0.06154	0.23814	0.73392	0.24626	0.56064	0.67179	0.62885	0.32606	0.21438	0.39268	0.26449	0.29272	0.52337	0.31479	0.82745	0.27291	0.17283	0.73751	0.3417	0.19371	0.45638	0.20494	0.7398	0.89487	0.91265	0.65528
REACTOME_PI_3K_CASCADE	0.353455	0.61214	0.5749	0.56664	0.52805	0.84218	0.55362	0.36756	0.67747	0.35987	0.12083	0.16745	0.59023	0.69028	0.69529	0.72391	0.49334	0.40389	0.5015	0.48326	0.35958	0.40419	0.06951	0.34435	0.28127	0.913	0.78778	0.89658	0.77499	0.30292	0.58512	0.12413	0.60549	0.3549	0.19723	0.34822	0.35201	0.58391	0.01898	0.11968	0.48099	0.15946	0.03893	0.12467	0.06227	0.86057	0.50509	0.66417	0.73427
BIOCARTA_INTRINSIC_PATHWAY	0.35482	0.14118	0.05416	0.09089	0.22434	0.06565	0.52055	0.13565	0.3113	0.12932	0.31129	0.20392	0.34049	0.26862	0.48014	0.21719	0.52285	0.44572	0.55345	0.43048	0.2469	0.22325	0.30675	0.16493	0.33663	0.53624	0.57174	0.14782	0.42216	0.33528	0.39449	0.10632	0.57086	0.22333	0.41321	0.21298	0.67664	0.3387	0.86501	0.49677	0.6971	0.25207	0.35613	0.44618	0.24589	0.36706	0.70842	0.46421	0.84067
REACTOME_INTERFERON_SIGNALING	0.354835	0.11236	0.10032	0.23662	0.18438	0.10165	0.04225	0.39958	0.13393	0.07847	0.39254	0.12397	0.50145	0.11004	0.15781	0.22635	0.25477	0.2611	0.27611	0.38372	0.0895	0.20182	0.22801	0.16056	0.07664	0.33542	0.01715	0.18329	0.50231	0.09787	0.09197	0.27236	0.11577	0.4844	0.59404	0.67272	0.79521	0.72002	0.86605	0.69915	0.46221	0.15363	0.14818	0.19327	0.04212	0.4236	0.43997	0.84507	0.28854
REACTOME_INTRINSIC_PATHWAY_FOR_APOPTOSIS	0.35498	0.11572	0.73297	0.18947	0.47848	0.9089	0.47092	0.26487	0.60381	0.01724	0.05579	0.02425	0.34118	0.90162	0.60808	0.85244	0.64426	0.90799	0.16151	0.44027	0.30025	0.33714	0.1122	0.38511	0.21098	0.2993	0.95847	0.48566	0.90897	0.55316	0.18042	0.12809	0.41177	0.08325	0.247	0.08768	0.59396	0.39714	0.12609	0.18363	0.79088	0.07474	0.07888	0.01581	0.0957	0.73384	0.79597	0.58008	0.74054
BIOCARTA_ERK5_PATHWAY	0.355545	0.47854	0.55284	0.3314	0.52304	0.63516	0.23108	0.0886	0.30624	0.54796	0.52654	0.56029	0.35816	0.64556	0.49981	0.42457	0.68649	0.09481	0.28856	0.31301	0.52107	0.46314	0.14814	0.23161	0.55547	0.28424	0.3446	0.62261	0.29122	0.44284	0.36437	0.22479	0.54903	0.6029	0.86225	0.81888	0.35109	0.35435	0.11606	0.37655	0.05535	0.73703	0.5596	0.75043	0.69692	0.20966	0.39505	0.66717	0.43299
KEGG_CYSTEINE_AND_METHIONINE_METABOLISM	0.35574	0.30827	0.6217	0.21381	0.22218	0.52332	0.60694	0.61487	0.37122	0.30468	0.55208	0.43353	0.20409	0.18333	0.2691	0.3218	0.14113	0.29484	0.43213	0.36198	0.48901	0.33586	0.08733	0.34186	0.30351	0.31911	0.5441	0.60623	0.26276	0.82523	0.47773	0.64373	0.66074	0.77207	0.98452	0.78025	0.81327	0.76795	0.28058	0.19169	0.48102	0.75605	0.70326	0.40699	0.76728	0.66734	0.60791	0.72057	0.37529
REACTOME_SRP_DEPENDENT_COTRANSLATIONAL_PROTEIN_TARGETING_TO_MEMBRANE	0.356075	0.19279	0.07927	0.44865	0.04113	0.16198	0.30582	0.38329	0.24222	0.19591	0.22126	0.1068	0.96862	0.17129	0.43101	0.36012	0.247	0.55169	0.24777	0.44301	0.09154	0.57591	0.23232	0.09441	0.17818	0.7867	0.13362	0.30222	0.60592	0.30962	0.19267	0.06242	0.19044	0.03771	0.01784	0.0657	0.11992	0.13857	0.28763	0.32412	0.4982	0.06658	0.09858	0.12917	0.07132	0.16874	0.46722	0.0962	0.47053
REACTOME_ACYL_CHAIN_REMODELLING_OF_PC	0.357785	0.35592	0.4346	0.23939	0.70032	0.38229	0.80946	0.7792	0.87573	0.46852	0.36713	0.63077	0.06147	0.45721	0.85049	0.53447	0.65493	0.19303	0.37324	0.22275	0.88433	0.79144	0.55925	0.77607	0.87255	0.17208	0.10701	0.31501	0.10646	0.6279	0.72508	0.82098	0.88912	0.50565	0.40211	0.35965	0.65169	0.0398	0.70565	0.547	0.32383	0.68785	0.74595	0.83783	0.7548	0.25589	0.13905	0.24374	0.71053
REACTOME_ASSOCIATION_OF_LICENSING_FACTORS_WITH_THE_PRE_REPLICATIVE_COMPLEX	0.35859	0.13606	0.30898	0.23319	0.18408	0.73511	0.6294	0.27263	0.55729	0.02841	0.0131	0.01645	0.14556	0.66576	0.49965	0.61232	0.53595	0.45497	0.15733	0.24095	0.10092	0.69814	0.30466	0.11033	0.16598	0.02124	0.31101	0.71736	0.17712	0.61675	0.36691	0.15987	0.25973	0.25886	0.16571	0.09747	0.77825	0.73997	0.11008	0.81416	0.96476	0.0532	0.03951	0.03747	0.07128	0.8504	0.59423	0.28207	0.89343
REACTOME_DESTABILIZATION_OF_MRNA_BY_TRISTETRAPROLIN_TTP	0.35895	0.528	0.57459	0.61093	0.27251	0.67079	0.59702	0.37804	0.66811	0.27328	0.54225	0.793	0.76007	0.69683	0.53998	0.77772	0.46307	0.89509	0.56207	0.39007	0.49851	0.85364	0.45865	0.57454	0.59709	0.46484	0.59865	0.42716	0.49879	0.68172	0.53958	0.41813	0.58017	0.11202	0.16224	0.31374	0.06286	0.5604	0.7435	0.68855	0.53905	0.1773	0.20869	0.25418	0.09977	0.20812	0.44713	0.50728	0.34493
REACTOME_HIV_LIFE_CYCLE	0.36003	0.08973	0.08217	0.26083	0.08759	0.05898	0.08999	0.7204	0.75596	0.32055	0.30477	0.63803	0.5305	0.04705	0.17047	0.02334	0.47568	0.06748	0.32284	0.1996	0.42992	0.17673	0.07872	0.37725	0.35338	0.17655	0.39196	0.65898	0.42691	0.26869	0.53571	0.35759	0.66442	0.09466	0.22886	0.7503	0.34965	0.77982	0.67441	0.83503	0.72267	0.44355	0.50758	0.90751	0.16347	0.1695	0.06488	0.83938	0.52042
BIOCARTA_CHREBP2_PATHWAY	0.36025	0.4667	0.43738	0.44689	0.17118	0.26612	0.71242	0.41848	0.22304	0.17755	0.25077	0.17386	0.98398	0.0766	0.13331	0.39649	0.10074	0.32015	0.57651	0.52369	0.25849	0.30355	0.41538	0.21875	0.37669	0.88863	0.44997	0.51898	0.84047	0.20215	0.27317	0.21187	0.23943	0.46178	0.60111	0.33741	0.40712	0.71257	0.97475	0.16985	0.72618	0.28184	0.27751	0.1975	0.32467	0.25407	0.4144	0.74658	0.07605
REACTOME_SHC_RELATED_EVENTS	0.36053	0.99047	0.39108	0.7339	0.918	0.42753	0.02183	0.01944	0.12584	0.42751	0.39756	0.22683	0.76167	0.89302	0.2351	0.85702	0.61811	0.69889	0.29121	0.21938	0.55941	0.03995	0.05035	0.08194	0.13166	0.30684	0.28374	0.19482	0.12858	0.10997	0.12425	0.12669	0.13663	0.49752	0.13733	0.42184	0.1054	0.04338	0.20021	0.82042	0.03559	0.45823	0.74891	0.71387	0.78905	0.15217	0.14859	0.69467	0.31181
REACTOME_CDC6_ASSOCIATION_WITH_THE_ORC_ORIGIN_COMPLEX	0.360655	0.18842	0.47496	0.28385	0.313	0.73967	0.54307	0.58835	0.45881	0.0522	0.01353	0.04056	0.13317	0.7137	0.2915	0.64359	0.36258	0.49935	0.27644	0.17088	0.29139	0.65132	0.63984	0.50768	0.39624	0.00944	0.31165	0.45252	0.25206	0.67076	0.48324	0.33892	0.44487	0.29942	0.35137	0.12985	0.6879	0.61776	0.41105	0.80416	0.8778	0.09415	0.06375	0.09742	0.1435	0.72032	0.43505	0.39082	0.69587
REACTOME_FGFR1_LIGAND_BINDING_AND_ACTIVATION	0.36068	0.21228	0.48584	0.39292	0.20228	0.60663	0.52638	0.61582	0.49071	0.25663	0.34503	0.35889	0.15288	0.49975	0.78742	0.67667	0.28089	0.64314	0.94087	0.65449	0.8158	0.85495	0.27497	0.27705	0.47328	0.66488	0.571	0.5808	0.46984	0.79932	0.51638	0.79244	0.59809	0.48082	0.75584	0.90512	0.65442	0.40493	0.06895	0.23499	0.44785	0.54425	0.47158	0.59207	0.50322	0.74285	0.55484	0.70515	0.72438
REACTOME_GLUCAGON_TYPE_LIGAND_RECEPTORS	0.36126	0.02221	0.64107	0.43319	0.14674	0.35206	0.53103	0.31672	0.29313	0.46421	0.68167	0.89379	0.10488	0.18366	0.45468	0.49772	0.07952	0.01497	0.17456	0.11615	0.36843	0.82837	0.21108	0.35074	0.60725	0.02715	0.83456	0.56305	0.31657	0.4705	0.5908	0.66698	0.37575	0.70887	0.7824	0.66833	0.50582	0.43752	0.34648	0.17482	0.42249	0.86866	0.58887	0.78955	0.78645	0.62671	0.44654	0.49098	0.22026
BIOCARTA_EPO_PATHWAY	0.36134	0.01565	0.1288	0.21518	0.05927	0.13846	0.02667	0.04358	0.10995	0.16322	0.62213	0.19299	0.61354	0.24928	0.33938	0.69933	0.35876	0.52516	0.58985	0.78447	0.31592	0.1884	0.0598	0.06609	0.15405	0.52011	0.30879	0.41216	0.32684	0.19614	0.1847	0.13617	0.23023	0.10546	0.22398	0.27883	0.08923	0.02378	0.3471	0.48265	0.03467	0.38375	0.6376	0.50295	0.51359	0.06654	0.0467	0.06544	0.45743
REACTOME_PTM_GAMMA_CARBOXYLATION_HYPUSINE_FORMATION_AND_ARYLSULFATASE_ACTIVATION	0.36201	0.24313	0.34889	0.18527	0.64432	0.59234	0.5869	0.02926	0.83678	0.49207	0.26692	0.60146	0.05644	0.83993	0.74607	0.22442	0.93466	0.16551	0.19666	0.10482	0.53079	0.19692	0.52144	0.20768	0.57652	0.57275	0.38794	0.17195	0.6674	0.55187	0.5045	0.10336	0.66833	0.85112	0.87175	0.90702	0.71651	0.6412	0.99027	0.94249	0.90535	0.98822	0.96772	0.98778	0.98314	0.44711	0.7114	0.34191	0.51537
BIOCARTA_PROTEASOME_PATHWAY	0.36211	0.08475	0.10109	0.32571	0.05006	0.15489	0.82554	0.03897	0.18776	0.07552	0.13254	0.16487	0.32125	0.14808	0.31109	0.49832	0.08419	0.14803	0.1109	0.15443	0.11314	0.78857	0.23665	0.3579	0.28624	0.64514	0.47127	0.83119	0.17307	0.35247	0.44396	0.1246	0.39848	0.08418	0.07111	0.36873	0.02472	0.31523	0.48878	0.89433	0.09599	0.27375	0.40795	0.49705	0.23853	0.04863	0.05536	0.11678	0.04505
REACTOME_THROMBIN_SIGNALLING_THROUGH_PROTEINASE_ACTIVATED_RECEPTORS_PARS	0.363965	0.01176	0.68797	0.48025	0.10592	0.26498	0.49055	0.82585	0.22455	0.56833	0.91663	0.62079	0.10087	0.13814	0.37738	0.54972	0.28484	0.09543	0.68586	0.71054	0.41679	0.61683	0.33404	0.23261	0.38652	0.00918	0.49666	0.07595	0.13622	0.46677	0.37452	0.78509	0.37152	0.36715	0.67272	0.15289	0.51462	0.28528	0.50916	0.14879	0.55372	0.24249	0.39672	0.25146	0.45719	0.50845	0.72306	0.47125	0.57153
REACTOME_MRNA_DECAY_BY_3_TO_5_EXORIBONUCLEASE	0.364135	0.48927	0.438	0.70468	0.25823	0.61253	0.40202	0.44192	0.90554	0.20828	0.36249	0.81405	0.5329	0.8191	0.66494	0.56097	0.74098	0.86623	0.51269	0.19671	0.9526	0.79818	0.21022	0.6099	0.86645	0.2746	0.18086	0.2018	0.23934	0.94929	0.71865	0.3047	0.98916	0.13	0.13891	0.52811	0.0572	0.41826	0.54894	0.39771	0.38737	0.38328	0.3184	0.59769	0.24751	0.12737	0.38946	0.21453	0.56727
BIOCARTA_GH_PATHWAY	0.364435	0.77028	0.59311	0.53257	0.50738	0.47738	0.0988	0.10116	0.30418	0.4739	0.55465	0.5343	0.35018	0.72732	0.33277	0.76211	0.42361	0.54482	0.2589	0.12734	0.58984	0.34057	0.17097	0.31496	0.48865	0.1641	0.52658	0.05753	0.11585	0.29454	0.26566	0.3672	0.35652	0.60425	0.33992	0.61842	0.22927	0.35817	0.28544	0.7413	0.18838	0.60729	0.68624	0.64937	0.80314	0.17894	0.39799	0.85432	0.46921
KEGG_TYPE_I_DIABETES_MELLITUS	0.36453	0.58506	0.70157	0.58673	0.48687	0.82508	0.13992	0.39507	0.27687	0.36237	0.29106	0.52306	0.12402	0.69446	0.10363	0.71757	0.22552	0.79068	0.27665	0.37915	0.75448	0.23487	0.32103	0.28486	0.20562	0.1578	0.80519	0.36095	0.58445	0.46982	0.09188	0.38238	0.21436	0.29618	0.37524	0.62588	0.23365	0.09706	0.21432	0.06154	0.01645	0.34154	0.53185	0.60082	0.42728	0.26422	0.03015	0.11151	0.06359
REACTOME_PLC_BETA_MEDIATED_EVENTS	0.36523	0.30771	0.36297	0.47591	0.1697	0.41079	0.90339	0.65732	0.39006	0.06638	0.14683	0.07205	0.81877	0.31671	0.56691	0.42276	0.64924	0.59562	0.48391	0.53061	0.48452	0.55474	0.15082	0.33352	0.41745	0.0711	0.2392	0.0639	0.30554	0.43012	0.44815	0.26584	0.56346	0.00214	0.02933	0.04975	0.0137	0.23338	0.75901	0.4436	0.63438	0.00525	0.02609	0.03278	0.02544	0.07816	0.83641	0.95467	0.59441
REACTOME_REGULATION_OF_GLUCOKINASE_BY_GLUCOKINASE_REGULATORY_PROTEIN	0.36554	0.76058	0.38487	0.64305	0.259	0.20348	0.30232	0.41817	0.54345	0.78781	0.70619	0.63876	0.90507	0.10118	0.2406	0.09473	0.23596	0.22835	0.5543	0.2524	0.44163	0.36928	0.35066	0.4212	0.4056	0.09512	0.04173	0.1583	0.2477	0.11402	0.37657	0.32557	0.4994	0.34563	0.6052	0.56019	0.48927	0.39456	0.79502	0.36747	0.48745	0.41633	0.29563	0.52173	0.07065	0.11405	0.37389	0.78793	0.5971
BIOCARTA_CXCR4_PATHWAY	0.365675	0.92014	0.56444	0.4325	0.93432	0.73376	0.12658	0.48542	0.33851	0.47345	0.16867	0.076	0.42282	0.81488	0.40517	0.51894	0.57628	0.74715	0.33684	0.24206	0.40094	0.64596	0.55319	0.42568	0.56621	0.12224	0.20601	0.07909	0.11927	0.58266	0.47555	0.58435	0.33596	0.17671	0.03042	0.055	0.16582	0.60393	0.11645	0.42021	0.34407	0.0047	0.01724	0.02735	0.02395	0.85178	0.46701	0.50662	0.32294
BIOCARTA_PTDINS_PATHWAY	0.36664	0.54725	0.99467	0.95321	0.76559	0.99585	0.97916	0.95052	0.89389	0.76633	0.5731	0.54262	0.08024	0.61772	0.77659	0.85072	0.45303	0.44517	0.60347	0.1623	0.3475	0.54695	0.92036	0.44285	0.48214	0.58976	0.26308	0.70956	0.1645	0.42877	0.62347	0.27016	0.49734	0.5611	0.41685	0.33993	0.23924	0.73097	0.02477	0.08569	0.47579	0.26142	0.06744	0.10928	0.0374	0.63317	0.63709	0.38963	0.68168
REACTOME_SYNTHESIS_OF_BILE_ACIDS_AND_BILE_SALTS_VIA_7ALPHA_HYDROXYCHOLESTEROL	0.368085	0.59651	0.99501	0.98733	0.88662	0.60759	0.45238	0.67959	0.46378	0.96517	0.54064	0.79492	0.15707	0.84157	0.33736	0.96485	0.5591	0.69783	0.62681	0.51243	0.4133	0.00209	0.01216	0.48599	0.10335	0.93078	0.71813	0.85028	0.32413	0.29097	0.30011	0.21806	0.30622	0.95954	0.72284	0.95468	0.64029	0.08559	0.25675	0.06948	0.09113	0.5908	0.35526	0.36706	0.22175	0.75702	0.31123	0.00527	0.35913
REACTOME_SEROTONIN_RECEPTORS	0.368275	0.1685	0.39159	0.07409	0.63164	0.82801	0.675	0.99815	0.44089	0.06078	0.0327	0.03487	0.0402	0.80466	0.51928	0.75416	0.50341	0.46797	0.18574	0.30067	0.22076	0.05458	0.03959	0.10781	0.028	0.72374	0.62663	0.36714	0.21676	0.31076	0.08741	0.08679	0.16959	0.20905	0.1501	0.02822	0.58061	0.19591	0.58227	0.38894	0.3812	0.0588	0.26386	0.03323	0.23947	0.90275	0.63137	0.17991	0.81117
REACTOME_FORMATION_OF_ATP_BY_CHEMIOSMOTIC_COUPLING	0.36871	0.21516	0.41698	0.08324	0.61236	0.56496	0.46837	0.81343	0.4609	0.13768	0.28524	0.03261	0.3268	0.39181	0.33825	0.40816	0.32225	0.19734	0.28224	0.20504	0.40921	0.66001	0.57495	0.76679	0.33818	0.06065	0.6523	0.16602	0.14089	0.48998	0.33057	0.56376	0.44034	0.26353	0.25867	0.15524	0.56179	0.6553	0.46963	0.47072	0.24155	0.24685	0.60859	0.31578	0.50906	0.69154	0.21548	0.7366	0.37162
REACTOME_CLASS_I_MHC_MEDIATED_ANTIGEN_PROCESSING_PRESENTATION	0.371605	0.17947	0.00165	0.41649	0.01903	0.00233	0.02428	0.57552	0.21209	0.48726	0.63218	0.55337	0.31123	0.04576	0.1627	0.05996	0.15481	0.32486	0.89822	0.91418	0.56846	0.62345	0.85026	0.3929	0.90696	0.12637	0.06899	0.11125	0.02298	0.50215	0.71708	0.9385	0.39597	0.6648	0.24543	0.75433	0.29557	0.1961	0.40977	0.53492	0.39233	0.82292	0.66115	0.6533	0.59533	0.02227	0.15209	0.00583	0.17531
REACTOME_CA_DEPENDENT_EVENTS	0.373155	0.44707	0.41762	0.58244	0.23189	0.49182	0.96105	0.82442	0.54908	0.16683	0.18806	0.18955	0.71994	0.59956	0.73495	0.81335	0.59607	0.83915	0.65087	0.65778	0.83336	0.44655	0.20152	0.39372	0.57829	0.07038	0.16522	0.04657	0.24736	0.6346	0.59025	0.61356	0.71141	0.04068	0.11639	0.23249	0.03061	0.3504	0.92688	0.64605	0.55092	0.1314	0.3156	0.3075	0.25293	0.08383	0.83674	0.91691	0.38813
REACTOME_GPVI_MEDIATED_ACTIVATION_CASCADE	0.37345	0.63461	0.98181	0.73647	0.81191	0.96707	0.25807	0.25743	0.42969	0.44897	0.1292	0.32274	0.07763	0.81796	0.50938	0.83019	0.43889	0.61194	0.29883	0.38845	0.28884	0.27105	0.23931	0.17829	0.14688	0.4494	0.40992	0.25039	0.24735	0.42944	0.16835	0.24545	0.22832	0.52695	0.22521	0.18803	0.39522	0.2417	0.00604	0.04683	0.02407	0.24866	0.13874	0.18946	0.28453	0.71247	0.05244	0.03137	0.24006
KEGG_PATHWAYS_IN_CANCER	0.37357	0.29516	0.69178	0.55627	0.16367	0.81421	0.76259	0.26527	0.46759	0.53354	0.63976	0.30037	0.23436	0.54497	0.73265	0.66235	0.36612	0.40123	0.69111	0.55617	0.57912	0.64748	0.33152	0.28897	0.6102	0.81454	0.90747	0.92006	0.53513	0.69135	0.56333	0.57339	0.58753	0.50217	0.33909	0.51221	0.41022	0.42902	0.04517	0.02427	0.08903	0.48998	0.12639	0.20567	0.21232	0.61776	0.16331	0.40079	0.41301
REACTOME_CIRCADIAN_REPRESSION_OF_EXPRESSION_BY_REV_ERBA	0.373885	0.22422	0.08476	0.03207	0.35877	0.16557	0.75166	0.31664	0.54448	0.12489	0.57915	0.09059	0.15065	0.60471	0.39	0.40378	0.27571	0.17472	0.54141	0.15851	0.66302	0.89706	0.70994	0.53054	0.46553	0.73057	0.9142	0.79065	0.71364	0.85756	0.5604	0.7542	0.40206	0.02305	0.0042	0.00531	0.04305	0.14749	0.65821	0.8524	0.71764	0.01654	0.43122	0.09326	0.07371	0.08225	0.28832	0.16077	0.17172
BIOCARTA_EPONFKB_PATHWAY	0.374205	0.08085	0.25043	0.64113	0.1228	0.40537	0.19296	0.86455	0.59857	0.35339	0.58994	0.43136	0.64468	0.30157	0.76227	0.63733	0.72054	0.36566	0.62903	0.80186	0.21027	0.55887	0.2823	0.53529	0.5445	0.98196	0.87834	0.95504	0.73683	0.30924	0.80284	0.49457	0.75584	0.33462	0.37	0.47186	0.45495	0.04	0.14469	0.20675	0.27928	0.36984	0.1831	0.301	0.32546	0.23614	0.11858	0.13525	0.86097
BIOCARTA_P35ALZHEIMERS_PATHWAY	0.37484	0.26728	0.37579	0.16193	0.33806	0.71968	0.98944	0.79641	0.99297	0.10485	0.24795	0.19511	0.23662	0.36169	0.94172	0.60457	0.58824	0.27575	0.47816	0.24141	0.70854	0.92877	0.53738	0.43306	0.73566	0.14022	0.16985	0.36514	0.22774	0.78387	0.87912	0.37369	0.79716	0.29333	0.3117	0.32771	0.59965	0.70034	0.74033	0.75657	0.88582	0.42706	0.8679	0.69856	0.62244	0.6054	0.64008	0.2121	0.75094
KEGG_VEGF_SIGNALING_PATHWAY	0.37631	0.904	0.55166	0.33513	0.9443	0.77969	0.31188	0.51696	0.83883	0.15249	0.02824	0.06235	0.18381	0.9323	0.75647	0.79692	0.91107	0.98047	0.46676	0.82005	0.90009	0.60392	0.37366	0.66521	0.83012	0.11629	0.23093	0.17821	0.01476	0.84176	0.75497	0.71461	0.88091	0.01601	0.00132	0.00328	0.05512	0.00598	0.01227	0.04603	0.05468	0.01732	0.15968	0.11273	0.16167	0.42251	0.15816	0.06864	0.8274
REACTOME_METABOLISM_OF_PORPHYRINS	0.37645	0.45224	0.01411	0.26342	0.04782	0.01177	0.01259	0.09608	0.01793	0.31019	0.16027	0.37932	0.37447	0.03781	0.02823	0.04515	0.0917	0.49564	0.26566	0.72775	0.04243	0.03079	0.19977	0.08563	0.07403	0.69243	0.82561	0.42901	0.79055	0.0305	0.06424	0.08103	0.05324	0.45557	0.73227	0.66969	0.32703	0.56568	0.68916	0.23461	0.55943	0.62078	0.78788	0.62294	0.63631	0.02465	0.51101	0.54551	0.27062
KEGG_GLYCEROLIPID_METABOLISM	0.3765	0.47697	0.56706	0.19751	0.90345	0.52832	0.37974	0.89999	0.51381	0.21786	0.70076	0.40329	0.4447	0.94698	0.5376	0.46019	0.6392	0.18595	0.36927	0.57451	0.40874	0.25759	0.08702	0.35066	0.0774	0.03175	0.17254	0.267	0.24863	0.33504	0.16928	0.10705	0.31774	0.16117	0.52902	0.15753	0.33593	0.36242	0.89787	0.92296	0.32072	0.38587	0.62813	0.69338	0.26484	0.41423	0.37727	0.69975	0.34979
KEGG_PRIMARY_IMMUNODEFICIENCY	0.37687	0.63633	0.88286	0.47831	0.80831	0.9716	0.83339	0.06179	0.90903	0.67837	0.68643	0.65417	0.25479	0.84288	0.84935	0.99354	0.92049	0.46295	0.54666	0.22743	0.68888	0.80178	0.29072	0.16748	0.61453	0.39202	0.16721	0.37079	0.22802	0.81138	0.42951	0.42923	0.62763	0.37383	0.29636	0.29658	0.61707	0.2922	0.2245	0.06087	0.61093	0.36384	0.51269	0.19233	0.56091	0.86933	0.57472	0.63855	0.86035
REACTOME_REGULATION_OF_IFNA_SIGNALING	0.37754	0.1332	0.33593	0.32513	0.39753	0.41913	0.80498	0.80955	0.92204	0.14152	0.3414	0.61091	0.10724	0.58673	0.87064	0.584	0.90872	0.48245	0.86284	0.91212	0.65653	0.90935	0.71958	0.4446	0.86078	0.28479	0.09646	0.20312	0.06487	0.72169	0.70397	0.82679	0.79326	0.32344	0.31891	0.55642	0.54669	0.88564	0.88144	0.70938	0.81391	0.26196	0.30992	0.67941	0.07448	0.4566	0.49458	0.71815	0.82015
REACTOME_DOUBLE_STRAND_BREAK_REPAIR	0.37771	0.46043	0.71506	0.52472	0.34258	0.75209	0.94774	0.09288	0.34964	0.30088	0.31717	0.39468	0.51205	0.7073	0.57784	0.85831	0.16693	0.23342	0.00189	0.00104	0.10546	0.8279	0.1896	0.0544	0.11176	0.83216	0.56109	0.90691	0.72662	0.47717	0.05153	0.01205	0.03886	0.08658	0.10335	0.22808	0.09403	0.32659	0.59574	0.68069	0.31013	0.25167	0.37697	0.40866	0.32325	0.10945	0.39746	0.71312	0.03823
REACTOME_MITOCHONDRIAL_FATTY_ACID_BETA_OXIDATION	0.37874	0.14369	0.10884	0.35249	0.06686	0.05202	0.41318	0.17615	0.43345	0.14949	0.23656	0.30005	0.58635	0.16601	0.31181	0.06994	0.40742	0.3266	0.29269	0.34396	0.24297	0.25559	0.13082	0.05902	0.17727	0.2672	0.1323	0.25487	0.38575	0.205	0.24974	0.07184	0.45566	0.70129	0.57064	0.99009	0.6988	0.81664	0.66351	0.34803	0.20672	0.7548	0.2716	0.74607	0.38315	0.31128	0.37587	0.67137	0.42057
KEGG_AMINO_SUGAR_AND_NUCLEOTIDE_SUGAR_METABOLISM	0.379015	0.50661	0.75665	0.44259	0.84242	0.59457	0.08016	0.35686	0.27738	0.45072	0.39488	0.26106	0.06056	0.39265	0.32102	0.17747	0.51096	0.19456	0.02639	0.01468	0.3148	0.49268	0.485	0.80376	0.60153	0.04786	0.04186	0.02428	0.05904	0.30316	0.45719	0.40689	0.69249	0.17884	0.31834	0.27463	0.21705	0.35212	0.15571	0.19572	0.18108	0.09277	0.14421	0.21565	0.02735	0.47696	0.0599	0.75041	0.23772
REACTOME_DESTABILIZATION_OF_MRNA_BY_BRF1	0.379755	0.5205	0.57486	0.61	0.28612	0.74343	0.58931	0.42375	0.84314	0.2382	0.52486	0.59179	0.73858	0.78445	0.53784	0.76621	0.60276	0.89953	0.37128	0.28775	0.53511	0.96498	0.52064	0.61721	0.73432	0.61486	0.57933	0.47243	0.51986	0.90894	0.52635	0.28724	0.80246	0.13839	0.17156	0.28635	0.09823	0.47604	0.69515	0.68654	0.5569	0.21642	0.28175	0.32571	0.15466	0.21192	0.47487	0.50908	0.43479
REACTOME_MRNA_SPLICING_MINOR_PATHWAY	0.379785	0.13346	0.29965	0.34287	0.17759	0.28869	0.50399	0.45171	0.31813	0.07692	0.06264	0.12293	0.73222	0.09748	0.19547	0.26535	0.2055	0.85639	0.51243	0.73889	0.5102	0.78394	0.22594	0.24739	0.45831	0.13641	0.14957	0.09925	0.03825	0.34957	0.28847	0.28208	0.42553	0.02723	0.26274	0.32077	0.20217	0.29071	0.85089	0.6408	0.83329	0.04712	0.30446	0.42084	0.12297	0.23016	0.2344	0.8676	0.44669
KEGG_THYROID_CANCER	0.380165	0.2806	0.56316	0.67323	0.21972	0.6875	0.63221	0.28052	0.33821	0.67689	0.89618	0.86056	0.39877	0.5678	0.519	0.6835	0.29599	0.54448	0.77864	0.57025	0.74658	0.65066	0.33245	0.51369	0.80581	0.81326	0.62742	0.87749	0.55559	0.53798	0.55538	0.64917	0.57869	0.33682	0.27534	0.4653	0.1933	0.13449	0.20448	0.12655	0.12262	0.65978	0.83578	0.77634	0.81596	0.19644	0.36616	0.21693	0.45456
REACTOME_SIGNALLING_TO_P38_VIA_RIT_AND_RIN	0.380315	0.51755	0.32865	0.41198	0.74437	0.61511	0.26408	0.04343	0.32132	0.36964	0.75072	0.54388	0.25322	0.91251	0.64453	0.77812	0.82298	0.08813	0.25505	0.22343	0.36613	0.22072	0.06945	0.15926	0.3045	0.21949	0.37213	0.46086	0.33393	0.37742	0.38705	0.4765	0.39922	0.45793	0.37408	0.54594	0.25371	0.1306	0.14846	0.48339	0.08129	0.381	0.61347	0.68516	0.53516	0.68976	0.33234	0.45281	0.43277
REACTOME_INTEGRATION_OF_ENERGY_METABOLISM	0.380435	0.0498	0.37508	0.49086	0.08089	0.27706	0.55482	0.7796	0.36012	0.15161	0.02748	0.0502	0.61389	0.08021	0.41167	0.38539	0.51372	0.38475	0.52393	0.60357	0.21504	0.42403	0.22496	0.27291	0.30038	0.0678	0.48382	0.10997	0.39413	0.15642	0.58459	0.38273	0.4607	0.0138	0.03292	0.03057	0.06313	0.1186	0.37325	0.02119	0.49283	0.0007	0.00097	0.00292	0.00291	0.18495	0.90825	0.56106	0.6715
REACTOME_ACYL_CHAIN_REMODELLING_OF_PI	0.38046	0.36811	0.21227	0.31523	0.69512	0.10832	0.54764	0.90264	0.87789	0.65431	0.21336	0.87369	0.07915	0.21141	0.84304	0.22284	0.91464	0.14778	0.5857	0.51261	0.9078	0.46546	0.61973	0.65432	0.95969	0.23754	0.01607	0.26502	0.14393	0.34046	0.74914	0.91954	0.95111	0.82524	0.40344	0.87662	0.5961	0.09637	0.58707	0.37954	0.1355	0.90941	0.52393	0.95359	0.67657	0.15771	0.09264	0.30516	0.74569
BIOCARTA_TPO_PATHWAY	0.381455	0.26385	0.16054	0.71226	0.10423	0.09058	0.013	0.05979	0.0379	0.48881	0.71976	0.32861	0.80237	0.15743	0.07562	0.32104	0.17582	0.58926	0.56767	0.7373	0.19675	0.12897	0.1737	0.17087	0.29564	0.28896	0.33988	0.10156	0.18009	0.09057	0.16709	0.27232	0.17581	0.70988	0.70132	0.8395	0.36867	0.26884	0.15293	0.59312	0.11477	0.65489	0.53348	0.3717	0.73379	0.16249	0.31149	0.41546	0.41906
REACTOME_ABACAVIR_TRANSPORT_AND_METABOLISM	0.381655	0.38156	0.85256	0.64059	0.96609	0.95738	0.47424	0.70754	0.63142	0.77933	0.51867	0.49744	0.92816	0.76661	0.70529	0.8054	0.67847	0.15341	0.14845	0.10668	0.16274	0.78397	0.2489	0.25075	0.16134	0.53158	0.58659	0.5727	0.6953	0.43465	0.08241	0.27579	0.17353	0.75157	0.19824	0.43335	0.41936	0.26406	0.05122	0.06312	0.15981	0.33776	0.07548	0.11074	0.13116	0.47695	0.01718	0.10167	0.16559
REACTOME_PLATELET_CALCIUM_HOMEOSTASIS	0.381705	0.61749	0.781	0.33416	0.69501	0.8299	0.80311	0.30694	0.63479	0.15931	0.32475	0.05899	0.92909	0.71428	0.82527	0.90039	0.61528	0.10749	0.11966	0.23641	0.08194	0.73971	0.5419	0.71873	0.51875	0.86775	0.83447	0.5856	0.3924	0.30936	0.40624	0.1915	0.28528	0.01625	0.04378	0.00916	0.0642	0.10109	0.26789	0.24799	0.60154	0.00289	0.00391	0.00292	0.00395	0.28886	0.45096	0.32235	0.54421
REACTOME_TRYPTOPHAN_CATABOLISM	0.38261	0.17745	0.14432	0.01293	0.55958	0.11901	0.31159	0.07393	0.42952	0.46372	0.76937	0.80955	0.34559	0.51734	0.31769	0.1224	0.50137	0.03862	0.10508	0.08833	0.69886	0.42824	0.09856	0.13469	0.31001	0.51046	0.74003	0.28106	0.81695	0.72142	0.23719	0.32883	0.45807	0.26561	0.49384	0.25348	0.53533	0.71997	0.68988	0.68356	0.491	0.70717	0.885	0.78996	0.78684	0.71319	0.51824	0.24907	0.42034
BIOCARTA_IGF1R_PATHWAY	0.384315	0.98949	0.32617	0.98647	0.22604	0.20802	0.02619	0.09816	0.0291	0.93464	0.87109	0.84114	0.955	0.22844	0.06628	0.44708	0.04493	0.74465	0.42485	0.51572	0.34247	0.11658	0.19048	0.1444	0.37788	0.87641	0.41372	0.36828	0.57471	0.11847	0.11711	0.21433	0.19176	0.81231	0.6209	0.81167	0.04752	0.56803	0.26636	0.48829	0.04073	0.87854	0.63495	0.62504	0.74844	0.06442	0.17828	0.82973	0.03029
REACTOME_G_BETA_GAMMA_SIGNALLING_THROUGH_PLC_BETA	0.384555	0.01283	0.7978	0.45603	0.08822	0.40181	0.76827	0.88356	0.48525	0.49413	0.73949	0.73309	0.11872	0.09364	0.54024	0.55402	0.20334	0.01589	0.34423	0.24817	0.25386	0.76228	0.19338	0.30803	0.40846	0.02021	0.74796	0.25961	0.29207	0.45183	0.54271	0.76874	0.45272	0.39943	0.49856	0.19614	0.3433	0.2819	0.15806	0.03302	0.48799	0.43108	0.14975	0.22114	0.30858	0.57606	0.38951	0.21538	0.42599
REACTOME_PEPTIDE_CHAIN_ELONGATION	0.38509	0.07651	0.04408	0.21272	0.01005	0.13666	0.32325	0.45242	0.15948	0.15668	0.38865	0.08851	0.89379	0.12351	0.28104	0.37971	0.10768	0.79928	0.58838	0.7351	0.13698	0.5989	0.24147	0.04784	0.10911	0.82282	0.28779	0.43407	0.38209	0.40609	0.07722	0.07572	0.09253	0.04258	0.05524	0.08539	0.12369	0.14688	0.42711	0.40438	0.30735	0.28164	0.65482	0.43494	0.5507	0.09676	0.37991	0.06731	0.20617
REACTOME_KERATAN_SULFATE_DEGRADATION	0.386165	0.52917	0.75334	0.50396	0.4687	0.46984	0.02567	0.68234	0.12885	0.29481	0.41863	0.08587	0.51592	0.18789	0.32903	0.26533	0.17543	0.70724	0.19201	0.26467	0.21974	0.20201	0.45916	0.74708	0.55188	0.18628	0.09368	0.11063	0.03313	0.21925	0.43849	0.15392	0.42094	0.222	0.46846	0.11398	0.5421	0.56517	0.14814	0.43728	0.69719	0.04643	0.03779	0.03845	0.10632	0.80495	0.511	0.85599	0.68994
REACTOME_GAP_JUNCTION_TRAFFICKING	0.38677	0.77914	0.75161	0.93801	0.30733	0.95659	0.96056	0.85107	0.66567	0.8876	0.67583	0.80769	0.58773	0.52969	0.56652	0.91812	0.16528	0.57655	0.20117	0.03674	0.57746	0.66332	0.68108	0.72504	0.7092	0.90535	0.96822	0.90816	0.889	0.8449	0.95281	0.6607	0.68849	0.43139	0.13307	0.67845	0.13686	0.643	0.3517	0.87978	0.47095	0.29967	0.46145	0.34347	0.26825	0.65864	0.09081	0.38331	0.40335
REACTOME_CHONDROITIN_SULFATE_BIOSYNTHESIS	0.38749	0.5409	0.19279	0.42775	0.2383	0.20484	0.03175	0.26603	0.33452	0.58535	0.72855	0.35635	0.80099	0.21313	0.45055	0.08574	0.68972	0.02452	0.0288	0.0362	0.2504	0.136	0.30677	0.12785	0.37747	0.97538	0.79899	0.80121	0.98371	0.41219	0.41818	0.06994	0.45243	0.14213	0.09746	0.06965	0.18119	0.20747	0.62967	0.2952	0.48055	0.11216	0.14724	0.11773	0.09534	0.16775	0.73662	0.15423	0.74834
BIOCARTA_PML_PATHWAY	0.387895	0.02098	0.04786	0.02114	0.13309	0.06856	0.28817	0.06838	0.04533	0.01065	0.15189	0.01649	0.33169	0.11823	0.12846	0.23616	0.1607	0.11102	0.48108	0.57872	0.05172	0.79794	0.43306	0.18889	0.08374	0.88438	0.58039	0.437	0.7267	0.12901	0.16017	0.36982	0.06326	0.18486	0.41114	0.20124	0.33226	0.77992	0.65574	0.31684	0.16204	0.07726	0.10066	0.0289	0.08609	0.60156	0.63646	0.96262	0.14925
REACTOME_OPIOID_SIGNALLING	0.388245	0.08196	0.53692	0.61507	0.12106	0.49009	0.89848	0.56454	0.49102	0.2407	0.48306	0.27451	0.57794	0.3011	0.65679	0.57114	0.52148	0.15417	0.239	0.42199	0.45201	0.5506	0.1072	0.26145	0.44263	0.06423	0.66505	0.23897	0.388	0.5729	0.54188	0.39658	0.60789	0.01771	0.07381	0.03692	0.0506	0.0429	0.33322	0.03738	0.3845	0.02576	0.04844	0.04027	0.06103	0.25134	0.86347	0.51695	0.69859
REACTOME_IL_6_SIGNALING	0.388685	0.6081	0.84205	0.53349	0.81782	0.93714	0.58927	0.15418	0.43038	0.83386	0.71643	0.72448	0.18412	0.76189	0.56175	0.72576	0.35853	0.49393	0.69062	0.44671	0.29113	0.69587	0.76257	0.34932	0.4328	0.20918	0.14777	0.13053	0.06291	0.37561	0.30246	0.48547	0.18209	0.85377	0.70721	0.36341	0.91504	0.60614	0.73071	0.49073	0.61297	0.27542	0.20033	0.16541	0.29218	0.87131	0.73428	0.60612	0.37077
REACTOME_SYNTHESIS_OF_BILE_ACIDS_AND_BILE_SALTS_VIA_24_HYDROXYCHOLESTEROL	0.38871	0.61484	0.97151	0.94332	0.73693	0.82448	0.3627	0.50387	0.24173	0.94874	0.79306	0.92175	0.23372	0.5122	0.1848	0.7753	0.34912	0.75619	0.74338	0.62974	0.37365	0.20347	0.16042	0.24361	0.10833	0.91139	0.58123	0.81935	0.2427	0.12031	0.1091	0.18345	0.08684	0.67227	0.22828	0.33156	0.10554	0.0973	0.83426	0.1887	0.21604	0.72685	0.69623	0.50933	0.77996	0.12179	0.3621	0.01663	0.19597
KEGG_RIBOSOME	0.388855	0.11593	0.05769	0.29071	0.01052	0.12709	0.35251	0.60076	0.19905	0.17709	0.34612	0.08259	0.93473	0.07686	0.2347	0.37608	0.09891	0.86827	0.65532	0.7946	0.16216	0.60495	0.30778	0.08915	0.16925	0.89232	0.28565	0.45807	0.5609	0.40575	0.14291	0.11918	0.12912	0.04661	0.04549	0.08945	0.16728	0.11998	0.5154	0.42419	0.62146	0.18955	0.36299	0.25094	0.43507	0.1008	0.45151	0.09848	0.25991
KEGG_ALLOGRAFT_REJECTION	0.38889	0.65699	0.92156	0.86097	0.37887	0.95797	0.49269	0.31987	0.29867	0.64656	0.78318	0.81717	0.59218	0.627	0.33629	0.83783	0.21276	0.86356	0.38812	0.37661	0.50472	0.1959	0.18767	0.11354	0.10964	0.41076	0.62693	0.74663	0.64655	0.4354	0.08347	0.27869	0.12787	0.49702	0.56017	0.80533	0.28084	0.38415	0.3717	0.13337	0.03509	0.49157	0.46146	0.66218	0.44556	0.40087	0.18843	0.74725	0.04694
REACTOME_ION_TRANSPORT_BY_P_TYPE_ATPASES	0.389045	0.428	0.54144	0.46254	0.58887	0.2733	0.1388	0.87365	0.1711	0.39647	0.14003	0.26827	0.38388	0.30083	0.22549	0.60319	0.33085	0.45784	0.4551	0.81189	0.12395	0.02466	0.01782	0.43054	0.09267	0.14921	0.57265	0.10009	0.29226	0.09307	0.17612	0.34142	0.15833	0.51914	0.61419	0.25566	0.75024	0.22123	0.62372	0.25106	0.82385	0.43837	0.33189	0.18379	0.57544	0.603	0.87229	0.45731	0.60564
KEGG_GLYCOSPHINGOLIPID_BIOSYNTHESIS_LACTO_AND_NEOLACTO_SERIES	0.389455	0.94167	0.39952	0.75843	0.94432	0.24057	0.05924	0.0085	0.00721	0.93607	0.6513	0.51868	0.82519	0.48876	0.01839	0.51159	0.01205	0.18083	0.02234	0.20598	0.01034	0.05897	0.28207	0.00651	0.00599	0.5232	0.43179	0.25447	0.14203	0.00759	0.00115	0.00863	0.00287	0.86153	0.53641	0.27804	0.88301	0.14501	0.53106	0.47477	0.04478	0.51449	0.48681	0.31143	0.43986	0.65382	0.52133	0.4557	0.01389
REACTOME_PYRUVATE_METABOLISM	0.38983	0.69959	0.35973	0.74605	0.27733	0.05028	0.48586	0.19185	0.28147	0.96951	0.90309	0.9205	0.98154	0.38488	0.04795	0.16934	0.33988	0.02935	0.01466	0.0109	0.0172	0.00534	0.00484	0.44657	0.02352	0.74411	0.65819	0.46877	0.07368	0.11823	0.27016	0.01526	0.52882	0.6809	0.75861	0.76648	0.68854	0.2128	0.95453	0.84493	0.77518	0.76552	0.74321	0.76307	0.5364	0.3343	0.67204	0.01327	0.60226
BIOCARTA_P27_PATHWAY	0.389865	0.04061	0.07251	0.08201	0.02795	0.46497	0.91942	0.99189	0.82327	0.03624	0.07726	0.09964	0.03249	0.24391	0.46442	0.47688	0.27031	0.6878	0.31843	0.24929	0.91389	0.7446	0.45955	0.32842	0.70638	0.69618	0.74662	0.28415	0.60469	0.86695	0.91168	0.56272	0.77579	0.10806	0.16897	0.48968	0.06516	0.54004	0.46064	0.39595	0.66375	0.18352	0.36695	0.46244	0.39657	0.1999	0.64409	0.82653	0.30594
REACTOME_INTEGRIN_ALPHAIIB_BETA3_SIGNALING	0.39009	0.06706	0.08743	0.08714	0.31863	0.19174	0.27031	0.11633	0.28955	0.01738	0.01945	0.03388	0.13934	0.7478	0.37831	0.42743	0.67625	0.35499	0.36819	0.27596	0.35456	0.35483	0.31088	0.36246	0.22922	0.5958	0.50822	0.51101	0.43854	0.21747	0.13173	0.09714	0.2828	0.02758	0.00808	0.08447	0.10628	0.2723	0.89858	0.89748	0.34206	0.02496	0.41188	0.45249	0.2591	0.35917	0.55987	0.76011	0.66968
REACTOME_REGULATION_OF_SIGNALING_BY_CBL	0.3909	0.30345	0.56544	0.18195	0.51648	0.847	0.22434	0.17672	0.39662	0.15185	0.25102	0.16989	0.63544	0.74498	0.39433	0.65071	0.43722	0.85187	0.28692	0.63627	0.59399	0.20554	0.06793	0.08614	0.22195	0.84101	0.91697	0.65301	0.94396	0.60967	0.1555	0.25061	0.24391	0.19173	0.21619	0.02896	0.56131	0.05152	0.05575	0.22453	0.08123	0.13425	0.53149	0.28154	0.4632	0.48496	0.12642	0.06863	0.5395
REACTOME_CYCLIN_E_ASSOCIATED_EVENTS_DURING_G1_S_TRANSITION_	0.39098	0.11963	0.01384	0.35417	0.02956	0.07814	0.42583	0.0909	0.42551	0.2453	0.29108	0.19463	0.3112	0.06487	0.44007	0.05149	0.13303	0.49554	0.30418	0.41316	0.4538	0.75669	0.66782	0.15727	0.69284	0.84274	0.0671	0.48286	0.01895	0.6618	0.7995	0.40412	0.34441	0.387	0.28364	0.63149	0.20966	0.4291	0.69196	0.75329	0.50153	0.54055	0.54826	0.61217	0.51545	0.07779	0.39496	0.01121	0.13507
REACTOME_CS_DS_DEGRADATION	0.39145	0.28406	0.59932	0.23008	0.4792	0.43146	0.15047	0.11454	0.15826	0.17471	0.38433	0.04932	0.91335	0.38218	0.55457	0.40018	0.39877	0.33041	0.05362	0.20377	0.08953	0.6371	0.15464	0.26115	0.16758	0.85052	0.95738	0.80644	0.74589	0.38271	0.23562	0.034	0.31693	0.00538	0.05388	0.00607	0.20962	0.03501	0.16273	0.50348	0.72433	0.00224	0.01852	0.0039	0.0074	0.52673	0.51894	0.11882	0.88061
BIOCARTA_ALK_PATHWAY	0.391775	0.80052	0.26307	0.92091	0.0703	0.26114	0.17173	0.60986	0.209	0.74946	0.66509	0.48967	0.65344	0.02645	0.06328	0.10578	0.08774	0.73919	0.60185	0.68979	0.58651	0.39892	0.52327	0.69919	0.80981	0.7132	0.41294	0.53178	0.75841	0.37357	0.69797	0.4365	0.7508	0.47733	0.4416	0.43939	0.37081	0.21784	0.0635	0.18767	0.61389	0.52449	0.51583	0.39934	0.5979	0.08104	0.42194	0.33831	0.64234
REACTOME_GRB2_SOS_PROVIDES_LINKAGE_TO_MAPK_SIGNALING_FOR_INTERGRINS_	0.392185	0.6925	0.53373	0.33456	0.776	0.19982	0.20226	0.02372	0.17665	0.47374	0.25796	0.32319	0.61395	0.81994	0.37662	0.35023	0.60016	0.21554	0.3695	0.20786	0.38426	0.12399	0.31951	0.41847	0.26201	0.36563	0.39192	0.2287	0.32641	0.10174	0.17811	0.17232	0.2664	0.19066	0.09799	0.25589	0.27666	0.14435	0.84126	0.93291	0.22157	0.20672	0.46755	0.63602	0.3717	0.30352	0.28976	0.68642	0.36693
BIOCARTA_IL4_PATHWAY	0.392975	0.74966	0.93655	0.92535	0.79636	0.92845	0.50142	0.61155	0.8383	0.63624	0.22695	0.38224	0.8768	0.62753	0.58791	0.50489	0.58146	0.50025	0.37399	0.39228	0.33212	0.562	0.73975	0.71202	0.74664	0.06981	0.02573	0.17145	0.04614	0.44113	0.73515	0.313	0.84289	0.63204	0.43809	0.41046	0.79272	0.58715	0.40923	0.29256	0.70539	0.22514	0.0378	0.3261	0.06303	0.45577	0.66865	0.69675	0.91627
KEGG_TYPE_II_DIABETES_MELLITUS	0.39346	0.73235	0.97035	0.61887	0.92615	0.72269	0.21526	0.68582	0.74978	0.54188	0.69433	0.50069	0.76252	0.52286	0.73762	0.34798	0.93329	0.48204	0.26122	0.62082	0.27735	0.18442	0.21903	0.5639	0.48466	0.33961	0.23074	0.16676	0.24346	0.25979	0.67791	0.42082	0.66652	0.0953	0.13768	0.06604	0.22201	0.2302	0.03685	0.04836	0.06511	0.11049	0.06152	0.11772	0.03662	0.62543	0.59803	0.61768	0.80184
REACTOME_BIOSYNTHESIS_OF_THE_N_GLYCAN_PRECURSOR_DOLICHOL_LIPID_LINKED_OLIGOSACCHARIDE_LLO_AND_TRANSFER_TO_A_NASCENT_PROTEIN	0.394255	0.72834	0.6024	0.64223	0.73135	0.49631	0.13163	0.2729	0.16983	0.72664	0.94679	0.74794	0.49373	0.8238	0.41445	0.55518	0.75353	0.68656	0.32676	0.10348	0.42259	0.32815	0.34915	0.16467	0.36208	0.75752	0.23662	0.20801	0.21696	0.50877	0.32701	0.22149	0.47905	0.91331	0.86649	0.97775	0.59166	0.3959	0.07369	0.72836	0.07091	0.95414	0.76028	0.89018	0.87387	0.13057	0.10045	0.15242	0.40046
REACTOME_CELL_CYCLE_MITOTIC	0.39436	0.44465	0.09824	0.44663	0.25918	0.15192	0.14669	0.19485	0.55089	0.45722	0.5372	0.30151	0.64216	0.17798	0.32169	0.06859	0.37698	0.4554	0.21359	0.31892	0.23786	0.27216	0.38987	0.09159	0.21832	0.2645	0.12317	0.61373	0.26157	0.38641	0.28422	0.15213	0.3075	0.44791	0.30902	0.25562	0.78113	0.57201	0.68693	0.88414	0.87746	0.34581	0.39068	0.42634	0.35584	0.22073	0.60572	0.03296	0.67452
REACTOME_SPHINGOLIPID_DE_NOVO_BIOSYNTHESIS	0.395195	0.77776	0.83621	0.21773	0.80302	0.42006	0.17273	0.36978	0.04101	0.39469	0.49691	0.68427	0.44524	0.28508	0.05708	0.37944	0.0939	0.78847	0.72122	0.92435	0.31576	0.3134	0.06943	0.20957	0.08537	0.0533	0.06302	0.08892	0.08271	0.22525	0.06825	0.1532	0.10042	0.67806	0.82744	0.34515	0.89588	0.86001	0.92375	0.91684	0.85234	0.64904	0.5695	0.64298	0.83216	0.46794	0.85146	0.66419	0.41586
BIOCARTA_EIF_PATHWAY	0.39551	0.79735	0.77318	0.48644	0.96494	0.8264	0.91812	0.38992	0.88409	0.64789	0.77127	0.1953	0.47989	0.81678	0.90922	0.76344	0.90799	0.24488	0.28668	0.22247	0.33087	0.87622	0.87914	0.2359	0.47894	0.1858	0.0611	0.28578	0.48771	0.87787	0.45664	0.86621	0.3948	0.54687	0.38528	0.25849	0.87929	0.39426	0.63276	0.23678	0.40224	0.24409	0.32079	0.08078	0.38653	0.79357	0.59023	0.38204	0.54393
REACTOME_PROCESSING_OF_CAPPED_INTRONLESS_PRE_MRNA	0.39613	0.12777	0.4304	0.51908	0.39607	0.56726	0.00686	0.58593	0.60935	0.36936	0.79998	0.73077	0.63467	0.44437	0.17038	0.18707	0.43883	0.34678	0.03245	0.07307	0.38265	0.09374	0.05742	0.42147	0.26921	0.13938	0.55281	0.2832	0.41896	0.56277	0.392	0.0634	0.80416	0.12469	0.33595	0.32492	0.3995	0.71569	0.71235	0.72358	0.71139	0.12564	0.2428	0.69785	0.06491	0.82499	0.18177	0.83585	0.64006
REACTOME_CONVERSION_FROM_APC_C_CDC20_TO_APC_C_CDH1_IN_LATE_ANAPHASE	0.39657	0.47476	0.38312	0.60446	0.3531	0.1486	0.24538	0.83941	0.14581	0.55587	0.42686	0.41235	0.66708	0.18509	0.1153	0.26335	0.24342	0.49147	0.58284	0.60641	0.32418	0.15279	0.94808	0.86754	0.69072	0.15766	0.16462	0.07332	0.31212	0.09473	0.52461	0.68598	0.35645	0.52798	0.23966	0.27571	0.26816	0.24779	0.464	0.17615	0.77722	0.36488	0.10938	0.19571	0.19807	0.15572	0.55017	0.39718	0.22585
REACTOME_P130CAS_LINKAGE_TO_MAPK_SIGNALING_FOR_INTEGRINS	0.39766	0.31865	0.20421	0.09514	0.53598	0.31022	0.90161	0.22996	0.77097	0.11364	0.08764	0.0736	0.38039	0.89465	0.67153	0.4503	0.88571	0.23555	0.34457	0.0711	0.76812	0.50716	0.69549	0.93337	0.71145	0.56203	0.73339	0.40166	0.53248	0.63417	0.70237	0.53948	0.82583	0.00822	0.00185	0.04132	0.01817	0.21098	0.84826	0.80138	0.51168	0.00669	0.14979	0.2284	0.06385	0.35452	0.38239	0.66838	0.40173
REACTOME_PROSTACYCLIN_SIGNALLING_THROUGH_PROSTACYCLIN_RECEPTOR	0.399525	0.00929	0.77616	0.44504	0.09898	0.36534	0.63412	0.83003	0.42462	0.52291	0.69008	0.74611	0.10155	0.10433	0.42606	0.5991	0.14739	0.0216	0.35377	0.38688	0.26355	0.65586	0.16708	0.22938	0.3263	0.02067	0.6831	0.27737	0.23633	0.48279	0.43337	0.73574	0.3601	0.65571	0.68888	0.24173	0.79491	0.24873	0.22467	0.04827	0.52294	0.6474	0.33039	0.34905	0.51137	0.72059	0.55039	0.22558	0.50856
REACTOME_SYNTHESIS_OF_BILE_ACIDS_AND_BILE_SALTS	0.400825	0.77441	0.99825	0.99679	0.89643	0.61042	0.50557	0.73565	0.42696	0.99007	0.68002	0.85796	0.33957	0.87194	0.34022	0.97556	0.48436	0.86799	0.68846	0.66658	0.39674	0.00351	0.02954	0.66527	0.14053	0.98174	0.67045	0.90043	0.13863	0.30607	0.35872	0.2695	0.32568	0.92524	0.52138	0.76247	0.2267	0.03496	0.44491	0.1654	0.1322	0.73117	0.57316	0.48691	0.39521	0.22824	0.27767	0.00224	0.25573
KEGG_UBIQUITIN_MEDIATED_PROTEOLYSIS	0.40098	0.10506	0.07504	0.30334	0.07749	0.09187	0.23339	0.79162	0.73494	0.202	0.40991	0.21894	0.08625	0.45539	0.41999	0.67698	0.57016	0.32196	0.92513	0.69024	0.71342	0.51272	0.84759	0.69151	0.89153	0.6216	0.94029	0.72572	0.77966	0.72864	0.8039	0.98095	0.64032	0.51899	0.18187	0.45082	0.35557	0.36572	0.5769	0.22076	0.4877	0.49689	0.50491	0.19706	0.32063	0.4738	0.35342	0.16073	0.40171
BIOCARTA_KREB_PATHWAY	0.40249	0.69439	0.75584	0.78838	0.8712	0.89371	0.61264	0.72345	0.93171	0.88268	0.41051	0.4964	0.24676	0.61348	0.80546	0.58104	0.84622	0.15678	0.302	0.2607	0.36816	0.56384	0.8828	0.70153	0.72761	0.36786	0.70842	0.23426	0.50549	0.53451	0.65163	0.51349	0.59082	0.75465	0.5041	0.48077	0.61559	0.71784	0.31374	0.37764	0.66499	0.43586	0.2458	0.29909	0.23781	0.66894	0.48658	0.63105	0.3098
REACTOME_REGULATORY_RNA_PATHWAYS	0.40325	0.86795	0.85477	0.78406	0.82786	0.89011	0.57423	0.8386	0.67909	0.82391	0.22661	0.65011	0.63047	0.51365	0.26307	0.66811	0.11954	0.94329	0.64091	0.32789	0.7264	0.7036	0.70812	0.34908	0.44962	0.19959	0.2324	0.17384	0.08653	0.87188	0.25388	0.88436	0.18896	0.61713	0.56712	0.60125	0.35459	0.31628	0.44388	0.71298	0.08143	0.7169	0.82339	0.93733	0.80044	0.31456	0.02165	0.44917	0.04618
BIOCARTA_IL2RB_PATHWAY	0.40456	0.68352	0.56346	0.88404	0.27576	0.28767	0.03191	0.03978	0.02533	0.59468	0.63038	0.52651	0.69612	0.31777	0.04817	0.54427	0.04435	0.68471	0.22738	0.52973	0.18884	0.11565	0.19558	0.03338	0.08291	0.76145	0.30547	0.67124	0.42227	0.10182	0.02929	0.09867	0.04247	0.92899	0.89598	0.85911	0.62481	0.32614	0.06185	0.06277	0.01318	0.75297	0.28319	0.38482	0.41508	0.2982	0.14141	0.32833	0.08035
BIOCARTA_BCELLSURVIVAL_PATHWAY	0.40466	0.88405	0.50939	0.1333	0.78541	0.80814	0.19259	0.0735	0.6684	0.22466	0.54077	0.15778	0.23204	0.95515	0.79347	0.77326	0.61852	0.96574	0.34106	0.62122	0.70099	0.13138	0.00575	0.01205	0.04365	0.94835	0.7423	0.94422	0.44804	0.88191	0.03624	0.11735	0.13891	0.15001	0.09624	0.06942	0.40204	0.15201	0.00194	0.10797	0.08819	0.17351	0.38591	0.11364	0.61931	0.63075	0.49067	0.09172	0.46349
REACTOME_DEFENSINS	0.40501	0.33089	0.37373	0.39036	0.3055	0.20738	0.41487	0.31631	0.2196	0.21971	0.61141	0.24253	0.17939	0.25142	0.084	0.33405	0.31764	0.54026	0.52965	0.69785	0.13827	0.26101	0.47247	0.36012	0.27727	0.16977	0.15418	0.12543	0.13931	0.107	0.14265	0.41512	0.23483	0.30939	0.46058	0.46219	0.20686	0.42736	0.62699	0.61743	0.27934	0.36826	0.60403	0.21601	0.42638	0.04441	0.52267	0.27064	0.1796
REACTOME_G_BETA_GAMMA_SIGNALLING_THROUGH_PI3KGAMMA	0.405115	0.01441	0.86608	0.52417	0.15241	0.4573	0.58376	0.61612	0.48973	0.38579	0.6427	0.59435	0.054	0.18085	0.65185	0.45844	0.39116	0.05178	0.31469	0.48127	0.29795	0.66396	0.12747	0.21549	0.32792	0.04087	0.53038	0.38341	0.13911	0.58398	0.30625	0.48734	0.46726	0.53769	0.56125	0.17953	0.6835	0.21415	0.08501	0.01226	0.21518	0.40464	0.21107	0.20538	0.39453	0.81132	0.63484	0.20676	0.67805
BIOCARTA_PGC1A_PATHWAY	0.40524	0.45871	0.87785	0.40844	0.56834	0.68884	0.81916	0.95888	0.53616	0.49683	0.32048	0.61272	0.34353	0.52046	0.37857	0.72478	0.19898	0.2973	0.97129	0.9407	0.67986	0.56038	0.71152	0.87206	0.75199	0.23071	0.38198	0.22399	0.92634	0.53076	0.52379	0.96252	0.66066	0.47522	0.64525	0.13791	0.75061	0.95733	0.99904	0.72623	0.93816	0.42724	0.51451	0.46167	0.29238	0.73112	0.98315	0.76689	0.71424
REACTOME_SIGNALING_BY_ERBB2	0.405415	0.34692	0.47256	0.24795	0.41002	0.80338	0.7349	0.16032	0.63691	0.03906	0.00731	0.01736	0.35616	0.79785	0.70048	0.91799	0.76385	0.78849	0.5922	0.75388	0.48285	0.21946	0.04908	0.06834	0.15471	0.54441	0.62644	0.5681	0.66691	0.27425	0.19495	0.15894	0.35274	0.0215	0.00422	0.02559	0.02147	0.03765	0.11201	0.09428	0.11516	0.00909	0.0182	0.02651	0.02382	0.32872	0.83215	0.68868	0.5972
REACTOME_LAGGING_STRAND_SYNTHESIS	0.406975	0.1797	0.33001	0.40586	0.22103	0.21471	0.77021	0.65889	0.55035	0.33389	0.21934	0.27511	0.48579	0.05591	0.76577	0.1447	0.45283	0.00885	0.01064	0.01554	0.02079	0.10684	0.08573	0.1654	0.09997	0.76462	0.6632	0.89201	0.97275	0.02033	0.37931	0.01068	0.31267	0.10494	0.04219	0.06042	0.40809	0.5713	0.73614	0.65198	0.98982	0.02158	0.00725	0.05384	0.01178	0.54171	0.84102	0.47344	0.95054
REACTOME_BINDING_AND_ENTRY_OF_HIV_VIRION	0.40755	0.61815	0.04665	0.52643	0.12481	0.0604	0.03353	0.5243	0.16245	0.61583	0.66359	0.65572	0.97364	0.15999	0.05286	0.18431	0.21918	0.59706	0.83768	0.60931	0.59443	0.41797	0.90642	0.81654	0.73023	0.3172	0.27579	0.32595	0.25832	0.29593	0.6323	0.96107	0.49802	0.16986	0.14467	0.51305	0.11363	0.28519	0.26257	0.75455	0.30295	0.41656	0.55221	0.78308	0.37379	0.04163	0.04138	0.41956	0.13178
KEGG_LYSINE_DEGRADATION	0.40915	0.06886	0.34521	0.19318	0.1318	0.4501	0.46447	0.60612	0.10868	0.12791	0.23005	0.83243	0.10061	0.48931	0.40353	0.32861	0.22002	0.20285	0.35178	0.65587	0.0433	0.11155	0.28793	0.07952	0.07643	0.44584	0.95605	0.90262	0.79248	0.07114	0.05494	0.04766	0.08079	0.7794	0.85859	0.88827	0.75114	0.6517	0.56078	0.32426	0.46925	0.89789	0.93188	0.97205	0.65773	0.79159	0.64024	0.65479	0.42387
REACTOME_TERMINATION_OF_O_GLYCAN_BIOSYNTHESIS	0.409155	0.79311	0.60206	0.40468	0.95408	0.73255	0.02557	0.20026	0.45008	0.23217	0.16246	0.28788	0.79523	0.8635	0.47294	0.17671	0.93033	0.36906	0.00502	0.04357	0.14236	0.03364	0.01754	0.22575	0.05338	0.13103	0.33813	0.38544	0.46547	0.08828	0.06637	0.01553	0.39005	0.32935	0.4759	0.39526	0.68679	0.95665	0.70698	0.85609	0.8777	0.3413	0.48566	0.55054	0.3664	0.97856	0.96979	0.81574	0.87727
REACTOME_REGULATION_OF_IFNG_SIGNALING	0.409255	0.12348	0.54664	0.46384	0.33088	0.47667	0.64489	0.47729	0.58606	0.1854	0.48484	0.41219	0.04861	0.38379	0.57444	0.48359	0.65759	0.07426	0.2571	0.57661	0.115	0.40759	0.57824	0.68973	0.67742	0.55931	0.34126	0.57785	0.2001	0.32478	0.54764	0.52965	0.74633	0.73035	0.80686	0.69179	0.89627	0.81232	0.77565	0.54254	0.88689	0.23964	0.15293	0.19225	0.13182	0.80245	0.68746	0.63943	0.8891
REACTOME_CELL_CELL_JUNCTION_ORGANIZATION	0.40986	0.67009	0.5422	0.62207	0.44744	0.54015	0.2617	0.81239	0.40407	0.41768	0.19073	0.14542	0.62647	0.67033	0.14151	0.80143	0.16282	0.98948	0.74991	0.88092	0.47912	0.21642	0.66625	0.84057	0.44031	0.25477	0.21894	0.0836	0.50657	0.45752	0.44433	0.41137	0.52725	0.05702	0.06897	0.07147	0.02691	0.16247	0.69092	0.58611	0.70445	0.11635	0.35599	0.09169	0.23424	0.05995	0.36706	0.17345	0.25854
REACTOME_METABOLISM_OF_STEROID_HORMONES_AND_VITAMINS_A_AND_D	0.41073	0.02959	0.15411	0.08015	0.04248	0.30486	0.89316	0.83634	0.36519	0.01206	0.00281	0.02512	0.23487	0.21587	0.56142	0.79443	0.26363	0.53041	0.42844	0.49777	0.28696	0.41731	0.33805	0.23989	0.24968	0.52714	0.94528	0.84933	0.89577	0.52319	0.51134	0.32992	0.24301	0.36085	0.23838	0.19411	0.56686	0.4428	0.71611	0.41406	0.78845	0.20205	0.18071	0.11362	0.23671	0.66721	0.73265	0.48303	0.38261
KEGG_PROTEIN_EXPORT	0.411805	0.56425	0.62688	0.89252	0.40155	0.57446	0.66615	0.13844	0.34987	0.51298	0.10749	0.59279	0.8996	0.355	0.64178	0.31235	0.52987	0.23794	0.18211	0.27393	0.14198	0.43141	0.20817	0.17258	0.30285	0.37226	0.11627	0.25245	0.66032	0.1548	0.6105	0.10329	0.39241	0.45949	0.31419	0.41495	0.73612	0.75315	0.06028	0.09686	0.41661	0.07519	0.00394	0.07291	0.00662	0.9483	0.72452	0.95997	0.92009
REACTOME_OPSINS	0.412445	0.76368	0.06019	0.25323	0.41429	0.03574	0.00971	0.27204	0.0482	0.68312	0.43192	0.43949	0.90561	0.29154	0.07793	0.16057	0.27464	0.23228	0.72711	0.82554	0.3868	0.07266	0.31757	0.64174	0.3757	0.7322	0.61902	0.81198	0.9887	0.12923	0.30358	0.38335	0.23229	0.29891	0.02426	0.20919	0.04476	0.04241	0.02341	0.16009	0.07286	0.30768	0.18158	0.40454	0.32246	0.13091	0.06702	0.08701	0.17497
REACTOME_GAB1_SIGNALOSOME	0.41324	0.41285	0.69953	0.58564	0.74561	0.89324	0.88814	0.3526	0.71873	0.47947	0.27734	0.55465	0.1462	0.71909	0.54649	0.68807	0.60852	0.28068	0.44877	0.38555	0.48256	0.41498	0.1966	0.20117	0.23625	0.60685	0.46041	0.71251	0.37014	0.26259	0.19461	0.15314	0.37295	0.38227	0.10545	0.27903	0.09677	0.51198	0.10286	0.15845	0.09685	0.34022	0.13355	0.30641	0.08332	0.68476	0.63906	0.29759	0.40504
REACTOME_ADHERENS_JUNCTIONS_INTERACTIONS	0.413545	0.56636	0.1705	0.65321	0.1843	0.25632	0.16503	0.71831	0.60075	0.3537	0.40787	0.23432	0.54156	0.55182	0.15194	0.52283	0.25803	0.98903	0.66796	0.72473	0.80442	0.56668	0.71984	0.90891	0.76995	0.10675	0.06695	0.07094	0.33388	0.70772	0.84439	0.69131	0.8826	0.02506	0.04215	0.09336	0.00872	0.24553	0.7758	0.61666	0.79049	0.09257	0.30835	0.17719	0.22833	0.02242	0.57851	0.1085	0.30419
REACTOME_COSTIMULATION_BY_THE_CD28_FAMILY	0.41423	0.74694	0.88842	0.51621	0.85436	0.93826	0.30144	0.4703	0.8063	0.20463	0.03132	0.04083	0.6275	0.89469	0.56101	0.75638	0.90917	0.86625	0.2874	0.43158	0.47408	0.45704	0.14995	0.28315	0.33097	0.59729	0.35636	0.67193	0.44213	0.59354	0.30857	0.27991	0.52592	0.02688	0.02293	0.03625	0.15457	0.04951	0.04134	0.15053	0.13092	0.01397	0.02501	0.05217	0.02311	0.59399	0.1174	0.18691	0.57324
REACTOME_COLLAGEN_FORMATION	0.414705	0.05694	0.4166	0.22916	0.22146	0.37084	0.65601	0.11725	0.33183	0.15587	0.55804	0.51753	0.05902	0.43876	0.82192	0.92575	0.27796	0.58109	0.69538	0.41796	0.37981	0.18978	0.14762	0.19287	0.14808	0.56022	0.56065	0.62975	0.68611	0.45803	0.34025	0.19832	0.49538	0.42346	0.22672	0.23014	0.46556	0.48212	0.40939	0.30315	0.69384	0.7992	0.85683	0.78241	0.83064	0.92205	0.46609	0.45831	0.58853
REACTOME_SIGNALING_BY_NOTCH	0.41494	0.06427	0.17914	0.15626	0.02786	0.55077	0.65403	0.75902	0.49557	0.09131	0.0484	0.0872	0.74467	0.08322	0.18665	0.2413	0.10893	0.31626	0.57528	0.33723	0.3882	0.36649	0.32595	0.36167	0.32007	0.48105	0.72048	0.50436	0.71086	0.40481	0.37025	0.30333	0.38345	0.28885	0.4077	0.42206	0.4748	0.69582	0.37632	0.14714	0.58109	0.15329	0.0821	0.25629	0.05769	0.78064	0.50938	0.66608	0.46733
KEGG_RETINOL_METABOLISM	0.415485	0.27207	0.14123	0.84891	0.10667	0.06548	0.36644	0.90105	0.29127	0.25756	0.7387	0.69115	0.74085	0.03905	0.29449	0.06716	0.24545	0.30568	0.49544	0.49802	0.3424	0.33535	0.87205	0.59729	0.76728	0.8598	0.40356	0.33513	0.85556	0.18358	0.79314	0.57638	0.56956	0.29049	0.51248	0.40728	0.25472	0.16447	0.46931	0.05323	0.44049	0.22006	0.07942	0.21697	0.13343	0.11213	0.46818	0.23748	0.43326
REACTOME_MICRORNA_MIRNA_BIOGENESIS	0.415605	0.85168	0.76527	0.78032	0.78222	0.82872	0.50332	0.71628	0.6144	0.73951	0.14422	0.53194	0.57072	0.47864	0.24506	0.58686	0.15839	0.95066	0.48434	0.31005	0.6677	0.64242	0.58072	0.22814	0.35142	0.16987	0.18463	0.15184	0.06339	0.84522	0.17572	0.82132	0.14137	0.48559	0.46527	0.68365	0.217	0.22193	0.35894	0.65851	0.04606	0.65097	0.83397	0.92635	0.85868	0.21245	0.01274	0.5947	0.03062
REACTOME_ACYL_CHAIN_REMODELLING_OF_PE	0.41598	0.49551	0.36283	0.36429	0.65954	0.31601	0.82926	0.96838	0.96808	0.7369	0.50052	0.8401	0.17065	0.44267	0.93234	0.56181	0.90052	0.30287	0.37766	0.28804	0.9809	0.82339	0.78051	0.93164	0.99784	0.30868	0.0824	0.37017	0.09481	0.78216	0.96916	0.97443	0.99647	0.56487	0.38014	0.55394	0.5489	0.0303	0.62077	0.40847	0.28022	0.77136	0.70632	0.88544	0.83342	0.21782	0.14327	0.27757	0.78804
BIOCARTA_IL6_PATHWAY	0.416485	0.62209	0.55888	0.60594	0.58945	0.39295	0.07691	0.02515	0.17025	0.74725	0.76313	0.66698	0.44717	0.69442	0.39028	0.73221	0.35407	0.58826	0.74971	0.2531	0.4538	0.29518	0.51658	0.26297	0.465	0.30352	0.17081	0.21028	0.08836	0.26274	0.37069	0.39614	0.25095	0.67696	0.3527	0.83642	0.22445	0.22165	0.78844	0.81633	0.11769	0.67521	0.64037	0.71183	0.72308	0.29858	0.32766	0.42795	0.27265
REACTOME_STEROID_HORMONES	0.41736	0.01102	0.10738	0.03281	0.02593	0.32207	0.84303	0.66401	0.32835	0.01026	0.00146	0.05127	0.14614	0.15142	0.53184	0.66023	0.2145	0.51419	0.58486	0.61971	0.37085	0.31215	0.23631	0.12876	0.21097	0.32	0.93993	0.90042	0.87531	0.55538	0.39038	0.29596	0.19218	0.62246	0.55225	0.30596	0.93375	0.86965	0.95024	0.55958	0.93711	0.41902	0.36048	0.32798	0.44938	0.90802	0.94283	0.75675	0.45291
REACTOME_SIGNAL_ATTENUATION	0.41744	0.73759	0.13401	0.51817	0.61559	0.23904	0.04539	0.04481	0.08607	0.24231	0.25098	0.2687	0.39008	0.67764	0.24663	0.58368	0.5417	0.56797	0.25327	0.22539	0.558	0.10354	0.39316	0.14636	0.33925	0.27017	0.28752	0.2058	0.1085	0.09976	0.18652	0.22352	0.16152	0.65107	0.1673	0.57555	0.09493	0.02921	0.47062	0.69646	0.02842	0.45972	0.70323	0.67492	0.79341	0.05778	0.12477	0.5081	0.18252
REACTOME_RNA_POL_I_PROMOTER_OPENING	0.417505	0.86342	0.76169	0.98967	0.69574	0.44455	0.07526	0.0581	0.01147	0.96571	0.64953	0.97231	0.00882	0.26529	0.03882	0.11199	0.10109	0.67962	0.05672	0.23656	0.07282	0.40235	0.46065	0.02049	0.06331	0.21096	0.31347	0.0312	0.41191	0.0452	0.02123	0.03261	0.01979	0.54347	0.5145	0.40351	0.18514	0.0999	0.7019	0.1648	0.06881	0.38624	0.58713	0.56257	0.63997	0.20409	0.54043	0.95605	0.04269
KEGG_STARCH_AND_SUCROSE_METABOLISM	0.41756	0.84488	0.59086	0.75014	0.52727	0.25117	0.37494	0.56332	0.83271	0.62354	0.50899	0.50528	0.84881	0.32985	0.72952	0.18277	0.90967	0.53555	0.38103	0.29451	0.62815	0.45135	0.43077	0.78002	0.9388	0.35644	0.11486	0.08793	0.2879	0.5371	0.98937	0.65027	0.98604	0.06504	0.04831	0.33228	0.04129	0.0892	0.02729	0.18307	0.21884	0.17764	0.2899	0.51292	0.15568	0.15718	0.3117	0.44004	0.89799
REACTOME_CELL_JUNCTION_ORGANIZATION	0.417835	0.56654	0.63088	0.73677	0.52653	0.71582	0.37293	0.8178	0.60413	0.53412	0.35051	0.24327	0.33365	0.7428	0.23214	0.87852	0.23533	0.91601	0.8237	0.92865	0.46192	0.17612	0.62571	0.72674	0.37914	0.08727	0.11745	0.0555	0.14586	0.4891	0.3971	0.53093	0.35561	0.2409	0.33049	0.29517	0.16068	0.31294	0.80108	0.17714	0.58325	0.22818	0.36222	0.10266	0.25957	0.22619	0.40522	0.31195	0.22475
KEGG_CITRATE_CYCLE_TCA_CYCLE	0.417845	0.27631	0.37558	0.30324	0.43003	0.36835	0.77766	0.55533	0.8264	0.53752	0.52902	0.6503	0.27729	0.68197	0.31537	0.81012	0.36222	0.04367	0.03721	0.02067	0.07398	0.01359	0.01198	0.56228	0.15582	0.39233	0.6022	0.49563	0.30699	0.72072	0.77248	0.13278	0.82981	0.82458	0.89208	0.65633	0.90219	0.65725	0.93633	0.7785	0.96283	0.8369	0.88118	0.78461	0.71046	0.91135	0.91557	0.18644	0.59493
BIOCARTA_MYOSIN_PATHWAY	0.419065	0.32857	0.53498	0.51023	0.39847	0.70182	0.41518	0.76474	0.6598	0.40027	0.24048	0.31122	0.19187	0.63425	0.39627	0.85004	0.57327	0.78223	0.59189	0.36127	0.85505	0.9781	0.78966	0.77668	0.84022	0.2044	0.43844	0.14381	0.24411	0.82804	0.80252	0.75948	0.69626	0.24912	0.24115	0.25554	0.20771	0.465	0.14616	0.74282	0.34723	0.21961	0.4629	0.50377	0.49527	0.47822	0.35855	0.95253	0.49601
REACTOME_LATE_PHASE_OF_HIV_LIFE_CYCLE	0.420815	0.10984	0.11678	0.27514	0.13111	0.13257	0.06144	0.59105	0.55021	0.32375	0.26383	0.53996	0.79784	0.08618	0.09111	0.04415	0.33608	0.12806	0.44991	0.36336	0.49344	0.29598	0.09121	0.32951	0.34316	0.36063	0.53034	0.77013	0.52218	0.42894	0.42115	0.48297	0.55841	0.16444	0.32593	0.74419	0.45438	0.76087	0.52389	0.73504	0.66709	0.43912	0.53217	0.83584	0.20238	0.39288	0.07634	0.83658	0.48269
REACTOME_RAP1_SIGNALLING	0.421605	0.4169	0.04779	0.10025	0.234	0.15813	0.68947	0.68927	0.35441	0.02853	0.03087	0.01927	0.81742	0.18493	0.33959	0.43466	0.3405	0.87048	0.58917	0.52084	0.30591	0.68358	0.6596	0.76668	0.6671	0.83649	0.19633	0.21755	0.72714	0.41887	0.80429	0.71352	0.58475	0.12266	0.11593	0.13246	0.19516	0.15503	0.96122	0.59763	0.893	0.09108	0.28804	0.12474	0.42096	0.05435	0.54295	0.90806	0.53607
REACTOME_PI3K_AKT_ACTIVATION	0.42168	0.89413	0.85703	0.72833	0.7783	0.97148	0.93456	0.22025	0.76233	0.47554	0.26521	0.41975	0.63558	0.81166	0.68938	0.75982	0.60235	0.26487	0.09077	0.21044	0.3349	0.44885	0.14143	0.45761	0.50403	0.96323	0.74072	0.97638	0.88688	0.43222	0.66594	0.20138	0.74308	0.23633	0.17523	0.16702	0.22342	0.48438	0.08819	0.10324	0.25893	0.1291	0.12516	0.1914	0.07388	0.89835	0.84045	0.40344	0.63332
REACTOME_ANTIVIRAL_MECHANISM_BY_IFN_STIMULATED_GENES	0.42331	0.60915	0.06447	0.38449	0.35166	0.08872	0.06881	0.34381	0.3592	0.3781	0.47453	0.34632	0.87198	0.26805	0.36648	0.17948	0.55443	0.48405	0.4948	0.41853	0.35585	0.3216	0.44553	0.28319	0.2806	0.22161	0.02042	0.24892	0.22126	0.18368	0.42637	0.45712	0.36458	0.48399	0.36471	0.71969	0.51485	0.3763	0.74426	0.79295	0.32671	0.49362	0.50869	0.71281	0.10794	0.19246	0.33785	0.61115	0.35148
KEGG_SELENOAMINO_ACID_METABOLISM	0.42334	0.15883	0.88283	0.17852	0.84298	0.99958	0.94431	0.76416	0.9227	0.15628	0.0508	0.20747	0.10242	0.99626	0.81716	0.99906	0.6563	0.93185	0.51249	0.45903	0.8064	0.46325	0.24258	0.17155	0.1931	0.1584	0.104	0.3394	0.06451	0.91643	0.30148	0.36061	0.39329	0.37914	0.6305	0.46659	0.84032	0.96144	0.78096	0.66303	0.67536	0.36721	0.69763	0.38688	0.25019	0.96822	0.58074	0.94847	0.41476
REACTOME_REGULATION_OF_COMPLEMENT_CASCADE	0.423365	0.46285	0.11997	0.32232	0.44322	0.21935	0.69509	0.77694	0.50906	0.47312	0.19451	0.70851	0.22262	0.54822	0.17497	0.67643	0.50261	0.8801	0.56589	0.68814	0.82593	0.77709	0.71961	0.76493	0.86553	0.25784	0.09331	0.08715	0.26541	0.74512	0.72932	0.86006	0.78875	0.22189	0.22734	0.19492	0.1507	0.26883	0.66345	0.56174	0.69654	0.31239	0.76468	0.60905	0.7893	0.03725	0.54214	0.11018	0.33712
KEGG_DRUG_METABOLISM_OTHER_ENZYMES	0.42408	0.15615	0.41668	0.08963	0.29679	0.12807	0.10591	0.03037	0.27222	0.14346	0.02155	0.08955	0.04211	0.27024	0.4689	0.01886	0.64979	0.05681	0.11827	0.30646	0.05461	0.01518	0.03056	0.11253	0.04873	0.30106	0.81404	0.42646	0.51349	0.06038	0.12781	0.02466	0.26673	0.0837	0.26116	0.1669	0.5684	0.3725	0.53091	0.2982	0.41634	0.07563	0.11837	0.31617	0.04838	0.60144	0.32216	0.49303	0.69472
REACTOME_VEGF_LIGAND_RECEPTOR_INTERACTIONS	0.424355	0.28695	0.14462	0.33517	0.18698	0.17105	0.75512	0.66949	0.74628	0.27197	0.4017	0.71223	0.57628	0.52174	0.85032	0.8189	0.85797	0.17771	0.90221	0.70315	0.7705	0.30352	0.38953	0.57982	0.75756	0.77429	0.98659	0.81862	0.79309	0.79706	0.89338	0.72067	0.93743	0.0233	0.1244	0.10098	0.07955	0.05344	0.06468	0.03172	0.18271	0.07289	0.23855	0.23	0.15443	0.40734	0.5745	0.31797	0.9182
REACTOME_FATTY_ACID_TRIACYLGLYCEROL_AND_KETONE_BODY_METABOLISM	0.424955	0.066	0.34446	0.10774	0.33938	0.25665	0.69125	0.84997	0.6295	0.32622	0.81434	0.40701	0.08049	0.19206	0.52174	0.04988	0.44283	0.08969	0.60593	0.29574	0.7065	0.44969	0.36986	0.24529	0.48013	0.12802	0.08872	0.57535	0.18965	0.66651	0.6852	0.62745	0.41895	0.53847	0.41495	0.28985	0.44089	0.80852	0.5007	0.68743	0.44938	0.45389	0.58716	0.5616	0.46079	0.48275	0.6444	0.09912	0.38488
BIOCARTA_MTOR_PATHWAY	0.42529	0.71502	0.77117	0.75941	0.6789	0.9747	0.31625	0.72129	0.83812	0.39695	0.33459	0.06741	0.54401	0.82249	0.58013	0.90255	0.55484	0.83691	0.24806	0.33587	0.72469	0.73794	0.39793	0.59299	0.72176	0.52471	0.17895	0.60579	0.40763	0.94265	0.39091	0.65511	0.6063	0.58571	0.2123	0.28889	0.86742	0.27721	0.06051	0.33467	0.58524	0.16439	0.16666	0.04057	0.38212	0.97891	0.71145	0.37906	0.53848
BIOCARTA_D4GDI_PATHWAY	0.42627	0.18915	0.43991	0.32094	0.17468	0.77625	0.86257	0.27272	0.51514	0.34989	0.17844	0.11929	0.39476	0.65436	0.43877	0.92003	0.30846	0.93351	0.86709	0.83679	0.72032	0.48977	0.17782	0.17799	0.28201	0.171	0.64249	0.10007	0.48448	0.73138	0.28788	0.33332	0.31225	0.50783	0.54277	0.19411	0.64699	0.67858	0.40162	0.08859	0.34824	0.30896	0.21396	0.06705	0.11052	0.55279	0.66721	0.29496	0.36588
BIOCARTA_LONGEVITY_PATHWAY	0.42637	0.8807	0.20434	0.74095	0.31925	0.23312	0.0722	0.23033	0.16688	0.63271	0.571	0.66794	0.94619	0.39438	0.16791	0.1609	0.17938	0.85181	0.45398	0.67072	0.70828	0.50486	0.14737	0.42666	0.65226	0.9828	0.92123	0.97195	0.90011	0.50396	0.53976	0.55261	0.59094	0.4442	0.2962	0.7496	0.22008	0.37489	0.03281	0.58064	0.19683	0.80291	0.77227	0.80665	0.92663	0.23255	0.30916	0.66541	0.28692
REACTOME_ANTIGEN_PROCESSING_UBIQUITINATION_PROTEASOME_DEGRADATION	0.42645	0.23655	0.00268	0.50202	0.02003	0.00384	0.02137	0.60067	0.24973	0.61592	0.60604	0.63359	0.41268	0.03433	0.14196	0.06088	0.09602	0.40977	0.99051	0.97585	0.65409	0.65933	0.93623	0.54691	0.94707	0.2339	0.17436	0.30114	0.0349	0.56435	0.80762	0.98512	0.34543	0.87639	0.4411	0.86041	0.54366	0.40345	0.39888	0.49452	0.45415	0.90375	0.68486	0.70081	0.61706	0.07914	0.16378	0.01502	0.12903
REACTOME_CELL_DEATH_SIGNALLING_VIA_NRAGE_NRIF_AND_NADE	0.426975	0.15476	0.18165	0.44742	0.05685	0.38614	0.09026	0.41604	0.49908	0.23049	0.16437	0.3825	0.1541	0.27624	0.46962	0.34422	0.54025	0.47124	0.07097	0.09359	0.5714	0.40633	0.17087	0.14213	0.58403	0.44308	0.04562	0.11225	0.0715	0.61687	0.71192	0.23604	0.80985	0.29459	0.20734	0.6234	0.20629	0.71391	0.47242	0.85192	0.83294	0.50505	0.586	0.79008	0.52897	0.32131	0.48258	0.76301	0.76475
REACTOME_SIGNALLING_BY_NGF	0.427185	0.78142	0.85708	0.59212	0.76757	0.98767	0.69787	0.42433	0.51088	0.11855	0.02404	0.09196	0.61308	0.95067	0.72572	0.97948	0.72045	0.89461	0.16926	0.27777	0.5045	0.34031	0.05479	0.03743	0.18088	0.26606	0.44077	0.24238	0.32995	0.33202	0.23347	0.07506	0.25814	0.01576	0.0144	0.07942	0.04623	0.42758	0.28561	0.42641	0.251	0.00523	0.07365	0.104	0.01685	0.5311	0.71337	0.96302	0.57331
REACTOME_APC_CDC20_MEDIATED_DEGRADATION_OF_NEK2A	0.42788	0.37339	0.32566	0.38956	0.26068	0.24836	0.17611	0.48615	0.20634	0.2911	0.41276	0.16855	0.86327	0.25461	0.18504	0.36471	0.41871	0.78466	0.28278	0.51558	0.2812	0.30284	0.69365	0.43451	0.32592	0.26761	0.12601	0.12501	0.31594	0.23435	0.25518	0.30134	0.34493	0.23225	0.14412	0.05202	0.256	0.13913	0.48696	0.26157	0.85247	0.1536	0.0726	0.12272	0.14929	0.26538	0.75287	0.52578	0.45145
BIOCARTA_AKAP13_PATHWAY	0.42812	0.56542	0.66756	0.75766	0.63287	0.79949	0.96304	0.74236	0.68037	0.26082	0.20731	0.23558	0.66498	0.58619	0.91717	0.57557	0.69694	0.17269	0.04843	0.06582	0.28554	0.36781	0.58224	0.21046	0.44188	0.90007	0.62474	0.53388	0.83313	0.36105	0.33242	0.26958	0.48129	0.2709	0.20517	0.58629	0.29663	0.51754	0.73091	0.08563	0.51508	0.10218	0.16218	0.20151	0.08815	0.72582	0.43503	0.98662	0.41225
REACTOME_NEGATIVE_REGULATION_OF_FGFR_SIGNALING	0.428885	0.25393	0.47335	0.42099	0.4272	0.63647	0.34954	0.44148	0.31467	0.19785	0.24149	0.11282	0.64594	0.7329	0.80172	0.78708	0.41929	0.27199	0.45045	0.59728	0.22602	0.80529	0.13216	0.07998	0.16487	0.69639	0.6721	0.70932	0.44518	0.39098	0.26394	0.17389	0.19622	0.24642	0.22488	0.44775	0.46105	0.354	0.10461	0.42337	0.40256	0.21402	0.16462	0.32578	0.22681	0.63944	0.33772	0.87525	0.53262
REACTOME_HORMONE_LIGAND_BINDING_RECEPTORS	0.42892	0.25304	0.81994	0.33055	0.81569	0.93382	0.60913	0.92979	0.59855	0.40451	0.2066	0.91682	0.02041	0.8892	0.55922	0.93712	0.65946	0.44546	0.7535	0.52751	0.89976	0.32532	0.54346	0.67069	0.33899	0.03826	0.3456	0.15553	0.14783	0.55495	0.47904	0.71812	0.52282	0.81773	0.91217	0.96156	0.66008	0.99249	0.83951	0.99037	0.34524	0.88876	0.89506	0.93943	0.93145	0.3808	0.31957	0.79168	0.23607
REACTOME_METABOLISM_OF_AMINO_ACIDS_AND_DERIVATIVES	0.429355	0.37808	0.16967	0.58087	0.07183	0.34833	0.4291	0.12365	0.44099	0.79496	0.62398	0.95093	0.47845	0.38251	0.45744	0.18309	0.2101	0.56364	0.61245	0.40008	0.74165	0.706	0.63465	0.3849	0.52716	0.94673	0.75821	0.95441	0.45935	0.8193	0.63784	0.58976	0.45359	0.5233	0.57459	0.74519	0.37084	0.10828	0.17085	0.42929	0.12779	0.70056	0.46675	0.71693	0.58587	0.33176	0.28214	0.07053	0.23333
REACTOME_G_PROTEIN_BETA_GAMMA_SIGNALLING	0.429505	0.02259	0.91107	0.56373	0.18604	0.5873	0.6596	0.74715	0.59353	0.45182	0.67211	0.67824	0.07896	0.172	0.666	0.49513	0.40223	0.05349	0.3587	0.38688	0.35959	0.78762	0.18123	0.3218	0.44262	0.04641	0.65331	0.41706	0.19827	0.59839	0.43834	0.56291	0.59549	0.44854	0.46019	0.14681	0.51704	0.26907	0.07032	0.0117	0.24393	0.34917	0.12671	0.17071	0.32875	0.80975	0.52651	0.23728	0.6812
KEGG_ERBB_SIGNALING_PATHWAY	0.4298	0.60306	0.69636	0.54951	0.64858	0.95018	0.67687	0.40888	0.87967	0.31081	0.42132	0.21753	0.24009	0.87969	0.87835	0.87936	0.87142	0.94755	0.64076	0.53621	0.89968	0.81683	0.31084	0.36973	0.79504	0.40562	0.20111	0.27128	0.09897	0.84135	0.53969	0.70086	0.73869	0.17153	0.03995	0.05341	0.17442	0.08467	0.04065	0.12526	0.17818	0.1155	0.11122	0.11302	0.22929	0.74833	0.80173	0.35348	0.82276
REACTOME_ACTIVATION_OF_CHAPERONE_GENES_BY_XBP1S	0.430165	0.72443	0.30198	0.98187	0.17459	0.07366	0.05816	0.89734	0.11724	0.93376	0.89834	0.81145	0.15393	0.11366	0.08022	0.11395	0.11348	0.54228	0.44787	0.40399	0.51312	0.22481	0.84715	0.89847	0.84871	0.16558	0.14058	0.10013	0.34313	0.34461	0.83468	0.91982	0.65823	0.73275	0.65819	0.60367	0.23713	0.33415	0.52411	0.45794	0.35118	0.34507	0.44644	0.48949	0.4242	0.17406	0.21908	0.59658	0.24125
REACTOME_GLUTATHIONE_CONJUGATION	0.4302	0.68371	0.94232	0.83716	0.43836	0.97108	0.67882	0.09215	0.65427	0.38015	0.21128	0.5065	0.56256	0.89174	0.76954	0.90312	0.27678	0.67396	0.46581	0.16391	0.84325	0.16645	0.75671	0.83721	0.8444	0.07463	0.18898	0.0702	0.0957	0.87035	0.86981	0.50474	0.76974	0.2722	0.18843	0.58284	0.28953	0.81746	0.50544	0.43921	0.13875	0.15788	0.16632	0.46849	0.06891	0.94278	0.4545	0.82012	0.34999
REACTOME_TRAF6_MEDIATED_IRF7_ACTIVATION	0.430555	0.05461	0.04865	0.29213	0.17442	0.03238	0.34488	0.22096	0.23581	0.49932	0.92622	0.95244	0.26137	0.0709	0.61206	0.07534	0.66702	0.00179	0.07468	0.14441	0.05039	0.47325	0.88918	0.77199	0.48701	0.46741	0.03994	0.23105	0.47063	0.08898	0.67442	0.60872	0.48675	0.75677	0.76076	0.43018	0.80834	0.83287	0.53603	0.3642	0.93942	0.52446	0.3306	0.34099	0.06111	0.68975	0.80058	0.48095	0.87765
REACTOME_PURINE_METABOLISM	0.430835	0.22761	0.56933	0.09575	0.82093	0.693	0.88498	0.55582	0.98414	0.05434	0.02315	0.09927	0.21284	0.94332	0.96043	0.61846	0.89959	0.51024	0.69935	0.58423	0.82311	0.8217	0.51362	0.2703	0.42358	0.24378	0.19554	0.06801	0.2661	0.6637	0.34612	0.37424	0.41156	0.20301	0.15411	0.24989	0.54818	0.10797	0.18017	0.09903	0.1318	0.09325	0.15564	0.24337	0.08487	0.59114	0.56098	0.67974	0.60129
KEGG_PPAR_SIGNALING_PATHWAY	0.43144	0.62928	0.98918	0.91521	0.89048	0.4415	0.07196	0.64877	0.11274	0.96606	0.8411	0.6843	0.20351	0.41604	0.17552	0.25595	0.33018	0.57252	0.38648	0.74022	0.13045	0.00415	0.0829	0.84756	0.07993	0.17692	0.27264	0.23011	0.26969	0.11366	0.11371	0.22099	0.28755	0.90774	0.89619	0.51289	0.91288	0.45678	0.56657	0.656	0.54541	0.61111	0.32523	0.29622	0.29314	0.45072	0.7639	0.05481	0.69824
REACTOME_SIGNALING_BY_SCF_KIT	0.431575	0.86591	0.87823	0.38361	0.9724	0.94416	0.4354	0.02968	0.44462	0.43171	0.10353	0.2023	0.79453	0.97832	0.71518	0.88709	0.60773	0.63185	0.34903	0.32147	0.23686	0.12073	0.10818	0.03265	0.07079	0.85986	0.81299	0.58599	0.53758	0.14074	0.09984	0.04507	0.08288	0.52177	0.30596	0.15377	0.58392	0.41077	0.35457	0.43899	0.15286	0.22172	0.27435	0.24254	0.27344	0.96457	0.8146	0.581	0.58558
REACTOME_TRANSPORT_OF_ORGANIC_ANIONS	0.431865	0.33122	0.2356	0.12922	0.46243	0.45706	0.50202	0.70173	0.78622	0.27775	0.4739	0.45487	0.79068	0.61544	0.75223	0.46864	0.93861	0.53327	0.88698	0.7227	0.93892	0.89575	0.21414	0.71955	0.66949	0.03253	0.02408	0.01392	0.00858	0.94037	0.94356	0.94523	0.91743	0.12147	0.4855	0.4045	0.08642	0.85851	0.96089	0.81049	0.94823	0.42961	0.84726	0.72345	0.83651	0.14459	0.80054	0.35987	0.82884
KEGG_T_CELL_RECEPTOR_SIGNALING_PATHWAY	0.43332	0.80212	0.49534	0.5782	0.61187	0.43146	0.01566	0.1426	0.36415	0.59076	0.66689	0.72429	0.92981	0.53971	0.45517	0.21073	0.79092	0.81393	0.20902	0.47113	0.66631	0.14618	0.05316	0.17872	0.52633	0.90112	0.31554	0.7697	0.75946	0.56451	0.53677	0.34484	0.78335	0.20561	0.17089	0.31999	0.34068	0.08881	0.0042	0.02253	0.08634	0.42201	0.39213	0.53991	0.39394	0.32708	0.20079	0.10802	0.89435
REACTOME_INHIBITION_OF_THE_PROTEOLYTIC_ACTIVITY_OF_APC_C_REQUIRED_FOR_THE_ONSET_OF_ANAPHASE_BY_MITOTIC_SPINDLE_CHECKPOINT_COMPONENTS	0.433475	0.50327	0.46455	0.66251	0.36584	0.25441	0.28602	0.55879	0.16996	0.45642	0.45362	0.35748	0.74114	0.29474	0.13679	0.40944	0.31132	0.70487	0.43228	0.49159	0.27544	0.30929	0.93623	0.75374	0.51314	0.15252	0.12595	0.08272	0.35714	0.16145	0.34281	0.46388	0.32662	0.44428	0.26454	0.20874	0.33947	0.23414	0.52472	0.17374	0.77858	0.2307	0.06937	0.14289	0.18259	0.22916	0.622	0.47088	0.31881
BIOCARTA_MCALPAIN_PATHWAY	0.43394	0.53167	0.6433	0.56834	0.58159	0.69118	0.86122	0.18661	0.4251	0.50371	0.42362	0.49316	0.14891	0.45315	0.63635	0.73678	0.40797	0.10754	0.44395	0.33654	0.53081	0.5794	0.5615	0.03644	0.29502	0.56489	0.58429	0.2607	0.35871	0.42394	0.06472	0.23442	0.17756	0.65723	0.29153	0.35712	0.36608	0.21471	0.58781	0.44028	0.05834	0.46468	0.60173	0.60594	0.59652	0.55624	0.23724	0.54878	0.0811
KEGG_OOCYTE_MEIOSIS	0.434175	0.53227	0.37512	0.53911	0.37868	0.40337	0.52047	0.63704	0.33348	0.11661	0.13221	0.06482	0.86137	0.66674	0.3209	0.73583	0.58396	0.53351	0.15183	0.43211	0.39656	0.3407	0.54684	0.64822	0.56794	0.63173	0.80388	0.50234	0.93364	0.42205	0.44735	0.41487	0.48142	0.04166	0.07085	0.11154	0.01829	0.23951	0.64347	0.12413	0.27503	0.02217	0.07676	0.07545	0.04985	0.0935	0.22022	0.80179	0.21703
REACTOME_HDL_MEDIATED_LIPID_TRANSPORT	0.43482	0.03787	0.32202	0.16224	0.24648	0.39378	0.37945	0.84099	0.51229	0.06077	0.44302	0.11106	0.06664	0.28774	0.76748	0.68441	0.50605	0.99118	0.99675	0.99809	0.70393	0.09646	0.08301	0.12676	0.1214	0.39383	0.33141	0.14165	0.49449	0.34393	0.11665	0.34506	0.25312	0.41228	0.71317	0.39082	0.92332	0.717	0.80066	0.99517	0.8197	0.41403	0.93726	0.69385	0.90099	0.59179	0.85488	0.9828	0.89239
REACTOME_BASE_FREE_SUGAR_PHOSPHATE_REMOVAL_VIA_THE_SINGLE_NUCLEOTIDE_REPLACEMENT_PATHWAY	0.434935	0.08734	0.12578	0.04934	0.44214	0.35181	0.36128	0.12988	0.94304	0.05711	0.02281	0.11116	0.03893	0.90651	0.87824	0.81059	0.8185	0.90187	0.55557	0.71962	0.91728	0.47476	0.28054	0.34868	0.55442	0.60895	0.40541	0.47727	0.37693	0.90667	0.59156	0.77058	0.67618	0.00438	0.0031	0.00866	0.00578	0.00309	0.27709	0.27484	0.07092	0.0961	0.4319	0.37929	0.5215	0.02001	0.05952	0.02142	0.35526
BIOCARTA_CSK_PATHWAY	0.437985	0.19656	0.23049	0.35832	0.31654	0.4441	0.55199	0.10567	0.63826	0.50497	0.36603	0.76056	0.09752	0.26442	0.70485	0.66116	0.58595	0.28725	0.39148	0.27916	0.44548	0.56936	0.38649	0.17622	0.54054	0.74456	0.6213	0.61537	0.69858	0.55174	0.38391	0.53223	0.61374	0.79644	0.69268	0.76817	0.55761	0.85536	0.26149	0.28797	0.52997	0.93264	0.70724	0.85871	0.80492	0.53235	0.35862	0.66592	0.41742
REACTOME_DSCAM_INTERACTIONS	0.438605	0.0157	0.09395	0.01443	0.47027	0.40394	0.76385	0.73678	0.95006	0.09038	0.18284	0.32595	0.07467	0.62488	0.82753	0.31863	0.96391	0.3547	0.9084	0.74551	0.8565	0.89697	0.18809	0.08973	0.21495	0.29766	0.14005	0.2193	0.30339	0.93355	0.2019	0.64874	0.61559	0.19074	0.44481	0.25612	0.84337	0.80788	0.6631	0.24642	0.4857	0.22881	0.30409	0.31761	0.11532	0.86673	0.73867	0.69936	0.932
KEGG_NEUROACTIVE_LIGAND_RECEPTOR_INTERACTION	0.43906	0.25374	0.63822	0.26876	0.70223	0.65126	0.57132	0.60471	0.17441	0.40139	0.73517	0.29719	0.32744	0.33366	0.39311	0.12644	0.17257	0.07152	0.35195	0.55799	0.02991	0.05438	0.15735	0.08047	0.02044	0.7092	0.89663	0.56127	0.95245	0.05466	0.05007	0.05334	0.03995	0.89644	0.97762	0.47697	0.99081	0.95381	0.9266	0.72273	0.50029	0.37037	0.45167	0.10435	0.60442	0.93969	0.98888	0.65284	0.35174
BIOCARTA_RHO_PATHWAY	0.43962	0.25673	0.54449	0.30565	0.54313	0.42737	0.26538	0.42565	0.40339	0.40766	0.50192	0.67074	0.11849	0.40563	0.66375	0.36535	0.58332	0.27093	0.12101	0.3472	0.27783	0.36044	0.33852	0.24937	0.29141	0.48695	0.46787	0.50256	0.14154	0.58845	0.21138	0.25515	0.44436	0.20088	0.39229	0.51394	0.37426	0.02676	0.29881	0.23378	0.0541	0.60413	0.73065	0.86497	0.77545	0.3735	0.36435	0.51518	0.63457
REACTOME_DOWNSTREAM_TCR_SIGNALING	0.44008	0.55244	0.213	0.30895	0.44581	0.40276	0.01558	0.34216	0.43945	0.4781	0.46722	0.73036	0.70926	0.36203	0.27736	0.13464	0.5314	0.82421	0.21953	0.35348	0.52634	0.37431	0.24463	0.76557	0.7319	0.8533	0.67346	0.69261	0.6416	0.73596	0.5487	0.68079	0.80958	0.30225	0.29025	0.36692	0.70545	0.78261	0.00931	0.22383	0.33025	0.39754	0.33481	0.5826	0.46844	0.84433	0.17509	0.41518	0.6274
REACTOME_ACTIVATION_OF_KAINATE_RECEPTORS_UPON_GLUTAMATE_BINDING	0.44045	0.08914	0.96267	0.82964	0.35377	0.57149	0.63879	0.78323	0.3754	0.87246	0.90812	0.94139	0.38259	0.2606	0.47641	0.48648	0.24205	0.0103	0.16553	0.12666	0.19954	0.49834	0.42601	0.43632	0.48823	0.05932	0.88216	0.52227	0.43891	0.40825	0.40746	0.61434	0.26365	0.88919	0.87239	0.50062	0.89465	0.65035	0.28477	0.11574	0.50939	0.72306	0.21298	0.27625	0.43272	0.91745	0.54166	0.29767	0.3511
REACTOME_MYOGENESIS	0.44045	0.60005	0.40678	0.27911	0.93767	0.56633	0.23886	0.89091	0.81689	0.2108	0.01882	0.03095	0.77592	0.65639	0.68618	0.30337	0.92806	0.56902	0.34727	0.75444	0.41622	0.19721	0.11519	0.40281	0.2112	0.36855	0.04249	0.15721	0.36452	0.40421	0.55176	0.47325	0.76582	0.29539	0.29133	0.27281	0.60323	0.28773	0.10837	0.10643	0.39599	0.14685	0.05024	0.10802	0.0344	0.3536	0.45171	0.31763	0.88982
REACTOME_CELL_EXTRACELLULAR_MATRIX_INTERACTIONS	0.44052	0.30317	0.80112	0.67404	0.59545	0.81015	0.29257	0.70482	0.47194	0.64541	0.64689	0.55035	0.55041	0.49133	0.2055	0.72443	0.39913	0.15373	0.6484	0.58997	0.12068	0.0636	0.15574	0.50479	0.07503	0.19366	0.65477	0.52122	0.50373	0.13638	0.10549	0.30533	0.11353	0.84466	0.96359	0.89568	0.94594	0.83338	0.7828	0.17019	0.48109	0.52468	0.47291	0.32643	0.38042	0.95729	0.3994	0.77872	0.40372
REACTOME_TCR_SIGNALING	0.44127	0.3806	0.24676	0.34362	0.3368	0.49246	0.0365	0.31521	0.45558	0.50078	0.51168	0.73457	0.6557	0.28433	0.44568	0.15846	0.78965	0.5841	0.11681	0.26217	0.29406	0.2596	0.0461	0.13372	0.21898	0.81124	0.54887	0.61901	0.74477	0.51754	0.13655	0.20137	0.51993	0.36942	0.5704	0.31133	0.73533	0.77497	0.0082	0.02129	0.22184	0.33032	0.31045	0.29661	0.20477	0.82673	0.28848	0.44758	0.73799
REACTOME_INSULIN_RECEPTOR_SIGNALLING_CASCADE	0.44151	0.78282	0.37607	0.61064	0.60526	0.84436	0.25861	0.48864	0.68686	0.29738	0.20254	0.13592	0.80976	0.76001	0.79223	0.76161	0.8558	0.43376	0.27688	0.40197	0.61792	0.4244	0.07837	0.59588	0.6742	0.9434	0.64147	0.88874	0.82342	0.72016	0.83442	0.5259	0.87903	0.52823	0.34271	0.51672	0.62151	0.41125	0.05598	0.36084	0.66916	0.27149	0.33989	0.28896	0.45518	0.91913	0.6715	0.74349	0.96573
REACTOME_KERATAN_SULFATE_KERATIN_METABOLISM	0.441965	0.67289	0.86443	0.74643	0.77813	0.69551	0.04201	0.56112	0.12006	0.72903	0.49374	0.55743	0.73257	0.40932	0.24601	0.42353	0.42299	0.21625	0.01663	0.03673	0.36647	0.09781	0.35743	0.58312	0.34766	0.1672	0.24829	0.17535	0.1329	0.19801	0.24915	0.15595	0.36631	0.39931	0.57995	0.35398	0.79081	0.90872	0.48454	0.8126	0.59976	0.15111	0.15544	0.29617	0.08333	0.97122	0.55691	0.96086	0.64191
KEGG_HEMATOPOIETIC_CELL_LINEAGE	0.443085	0.88954	0.63483	0.57107	0.89421	0.64702	0.14759	0.24071	0.80506	0.9184	0.46121	0.52395	0.7693	0.93279	0.64968	0.36771	0.60324	0.90691	0.48323	0.38587	0.75268	0.19428	0.44396	0.04254	0.22284	0.29318	0.03462	0.47102	0.00972	0.74953	0.21875	0.38818	0.07384	0.73195	0.53278	0.5189	0.45546	0.04149	0.26614	0.6695	0.11346	0.85381	0.89009	0.8635	0.86814	0.04693	0.11869	0.00249	0.09478
REACTOME_TELOMERE_MAINTENANCE	0.443135	0.65374	0.3345	0.66356	0.30623	0.35899	0.49508	0.37131	0.1488	0.73176	0.77142	0.76729	0.74642	0.12406	0.32508	0.23255	0.15141	0.13306	0.04606	0.07149	0.03709	0.18206	0.20651	0.10023	0.12145	0.79783	0.85552	0.94277	0.99857	0.03347	0.10926	0.01781	0.11215	0.40609	0.23197	0.25238	0.58045	0.77488	0.85563	0.90068	0.97386	0.15861	0.09817	0.27357	0.15153	0.80871	0.94732	0.77256	0.70572
REACTOME_LIPOPROTEIN_METABOLISM	0.443605	0.25548	0.60564	0.73607	0.22809	0.59096	0.70806	0.93971	0.70585	0.58258	0.88555	0.6341	0.3739	0.11083	0.70661	0.37547	0.39124	0.58398	0.94624	0.97777	0.5381	0.15024	0.14183	0.33292	0.5049	0.85239	0.25081	0.44776	0.52183	0.25352	0.5722	0.62806	0.62468	0.81061	0.83748	0.43645	0.94313	0.86157	0.78854	0.37842	0.8615	0.50475	0.37171	0.42329	0.41129	0.82029	0.9525	0.97836	0.97399
KEGG_ABC_TRANSPORTERS	0.443715	0.36639	0.66079	0.70232	0.38232	0.46453	0.23028	0.12692	0.41785	0.96764	0.91166	0.88764	0.90728	0.33278	0.6543	0.60024	0.73988	0.494	0.56904	0.7729	0.26281	0.37171	0.27125	0.39056	0.47295	0.72644	0.6301	0.57993	0.29174	0.55436	0.29885	0.26612	0.66789	0.88575	0.81249	0.8164	0.97665	0.87133	0.18774	0.15932	0.82547	0.80382	0.22342	0.36598	0.3752	0.93766	0.79349	0.82535	0.82126
REACTOME_MEIOSIS	0.443925	0.56944	0.4437	0.70144	0.27693	0.75461	0.57596	0.46454	0.23666	0.66926	0.62811	0.74655	0.17732	0.48525	0.24938	0.61784	0.12505	0.56283	0.15359	0.09022	0.47603	0.74295	0.64201	0.13674	0.26988	0.61033	0.58123	0.80553	0.70944	0.54328	0.15327	0.17313	0.12402	0.64159	0.66095	0.45661	0.40492	0.39633	0.77348	0.163	0.26957	0.49547	0.67334	0.47796	0.5719	0.69393	0.49904	0.70507	0.12438
REACTOME_SHC1_EVENTS_IN_EGFR_SIGNALING	0.44428	0.77547	0.55981	0.51147	0.97242	0.37515	0.0349	0.01556	0.07842	0.58355	0.61574	0.51783	0.25135	0.85841	0.29069	0.79287	0.602	0.12738	0.49612	0.4232	0.38122	0.0532	0.04291	0.0332	0.08177	0.70539	0.49352	0.61554	0.49158	0.08284	0.04198	0.14542	0.06334	0.56879	0.09279	0.34346	0.07661	0.05476	0.1966	0.27462	0.00701	0.58581	0.58535	0.74522	0.66617	0.30435	0.1285	0.40203	0.15254
BIOCARTA_CARM1_PATHWAY	0.444945	0.21728	0.15702	0.34416	0.27733	0.42415	0.98604	0.14122	0.66448	0.48274	0.76352	0.64303	0.40633	0.36996	0.90898	0.5504	0.71008	0.1788	0.24792	0.23004	0.31352	0.6846	0.49705	0.18738	0.325	0.96868	0.61114	0.56366	0.88854	0.54197	0.40651	0.23977	0.5548	0.38808	0.11336	0.27567	0.36069	0.58596	0.80184	0.39895	0.82122	0.32755	0.32153	0.44462	0.32045	0.5163	0.63819	0.54364	0.77896
REACTOME_MTORC1_MEDIATED_SIGNALLING	0.446165	0.65124	0.63527	0.44091	0.33899	0.98653	0.99975	0.8746	0.89897	0.14065	0.04214	0.01013	0.60074	0.53117	0.87179	0.91173	0.30532	0.79709	0.55697	0.38187	0.33777	0.92534	0.76051	0.46284	0.62578	0.6103	0.09973	0.41278	0.35362	0.84484	0.69121	0.77407	0.43623	0.60423	0.28055	0.13978	0.93175	0.29465	0.65738	0.16577	0.99533	0.12049	0.05367	0.01455	0.10956	0.99741	0.99897	0.14149	0.82795
REACTOME_REGULATION_OF_PYRUVATE_DEHYDROGENASE_PDH_COMPLEX	0.446195	0.34702	0.15285	0.58082	0.10283	0.04293	0.65971	0.06613	0.23811	0.89411	0.79934	0.93486	0.9507	0.44679	0.03401	0.63963	0.26783	0.01851	0.01248	0.00692	0.01296	0.00461	0.00289	0.17773	0.01126	0.62088	0.77531	0.4029	0.10386	0.22597	0.14914	0.01889	0.43774	0.55712	0.63523	0.97128	0.42466	0.1796	0.91618	0.74141	0.46138	0.87192	0.87613	0.95469	0.70998	0.38128	0.44229	0.02365	0.32666
KEGG_CELL_ADHESION_MOLECULES_CAMS	0.44635	0.66366	0.94615	0.91848	0.6881	0.96696	0.58589	0.62276	0.30751	0.63299	0.45807	0.46865	0.31235	0.7766	0.26886	0.88476	0.27029	0.986	0.71172	0.52449	0.32214	0.32808	0.43604	0.27251	0.18925	0.23214	0.2984	0.0667	0.63625	0.23172	0.15385	0.17478	0.1342	0.7178	0.55281	0.64688	0.62859	0.46592	0.22409	0.14317	0.14119	0.44559	0.19328	0.20101	0.23695	0.62901	0.10915	0.44711	0.21752
REACTOME_ACTIVATION_OF_GENES_BY_ATF4	0.44715	0.52499	0.27604	0.42685	0.52949	0.69661	0.78005	0.72688	0.8632	0.09547	0.13567	0.4973	0.77708	0.88821	0.8029	0.91866	0.62316	0.96504	0.80459	0.41933	0.66905	0.94912	0.42706	0.27453	0.19876	0.40494	0.34594	0.30288	0.37136	0.79259	0.20621	0.30704	0.264	0.20095	0.19657	0.40607	0.27341	0.4104	0.56159	0.90277	0.85039	0.28412	0.34201	0.56156	0.17076	0.388	0.71369	0.25972	0.7058
REACTOME_DEVELOPMENTAL_BIOLOGY	0.447305	0.71337	0.37619	0.70417	0.8575	0.32325	0.19935	0.45139	0.8597	0.8374	0.66716	0.52106	0.3088	0.72086	0.85163	0.24234	0.99378	0.15352	0.13305	0.06577	0.65095	0.1815	0.56837	0.45064	0.77465	0.37283	0.16852	0.35731	0.22265	0.43533	0.8415	0.47403	0.90699	0.38128	0.32854	0.47884	0.61585	0.03064	0.0718	0.32839	0.11225	0.21939	0.09305	0.29882	0.04189	0.29708	0.36438	0.18377	0.92414
REACTOME_ENOS_ACTIVATION_AND_REGULATION	0.44763	0.48215	0.37961	0.88463	0.12088	0.13053	0.10535	0.74982	0.02114	0.40906	0.14188	0.57614	0.64384	0.20672	0.02842	0.38383	0.03299	0.51526	0.19242	0.2562	0.63538	0.65446	0.77828	0.94633	0.89293	0.59041	0.97896	0.82275	0.81401	0.56317	0.62087	0.63228	0.42813	0.50397	0.25239	0.88035	0.08187	0.23771	0.48853	0.67987	0.07717	0.64817	0.80217	0.76227	0.63297	0.13359	0.01906	0.34062	0.03614
REACTOME_TRANSPORT_OF_INORGANIC_CATIONS_ANIONS_AND_AMINO_ACIDS_OLIGOPEPTIDES	0.44972	0.75779	0.81025	0.61957	0.69407	0.72867	0.56206	0.30158	0.60562	0.40705	0.31455	0.34879	0.7801	0.66458	0.46803	0.73732	0.45085	0.90232	0.71994	0.75178	0.48586	0.69141	0.93616	0.31941	0.35833	0.77089	0.92338	0.47371	0.8042	0.49864	0.33772	0.53737	0.29172	0.20991	0.33158	0.16254	0.54755	0.5218	0.97379	0.96325	0.94617	0.1463	0.41982	0.35283	0.44512	0.67373	0.82103	0.38753	0.66299
REACTOME_PI3K_CASCADE	0.449915	0.64669	0.50832	0.6448	0.4438	0.85596	0.59376	0.91644	0.86325	0.39735	0.242	0.21811	0.73321	0.50634	0.781	0.51606	0.79643	0.26845	0.20161	0.35939	0.54739	0.79776	0.1599	0.88564	0.8764	0.86339	0.56963	0.84204	0.80737	0.82253	0.9602	0.63606	0.97837	0.53539	0.57156	0.57061	0.76154	0.61243	0.07444	0.29143	0.95562	0.32364	0.22122	0.22513	0.31306	0.84108	0.67328	0.53288	0.98173
REACTOME_O_LINKED_GLYCOSYLATION_OF_MUCINS	0.451225	0.89812	0.85368	0.89202	0.91606	0.72398	0.02699	0.14737	0.0896	0.8435	0.95704	0.92979	0.96279	0.75798	0.36877	0.21197	0.44091	0.17666	0.00149	0.01224	0.10816	0.10641	0.07021	0.26179	0.11861	0.49482	0.36122	0.74701	0.88953	0.16363	0.06229	0.03892	0.23495	0.33463	0.37174	0.56835	0.2157	0.81585	0.80348	0.68348	0.29865	0.44254	0.52537	0.75327	0.21481	0.59325	0.52863	0.67104	0.19741
KEGG_PRION_DISEASES	0.45176	0.88557	0.49145	0.50243	0.65107	0.36778	0.10139	0.56668	0.34238	0.42348	0.63154	0.39639	0.3608	0.70834	0.18604	0.84122	0.40034	0.78953	0.84776	0.72973	0.95878	0.34807	0.63197	0.67794	0.75599	0.14466	0.2541	0.03511	0.38175	0.50915	0.49534	0.83877	0.65131	0.30546	0.47415	0.40184	0.21276	0.25467	0.61289	0.90655	0.20649	0.4047	0.80294	0.81861	0.73215	0.0859	0.08293	0.42287	0.18649
REACTOME_UNFOLDED_PROTEIN_RESPONSE	0.452775	0.72985	0.28636	0.95533	0.2855	0.21411	0.1572	0.86044	0.22194	0.70805	0.62604	0.81629	0.34843	0.38257	0.1637	0.37257	0.27737	0.82886	0.56687	0.59295	0.38165	0.52458	0.79378	0.63765	0.41064	0.17928	0.12732	0.05175	0.34229	0.36664	0.37213	0.57921	0.35172	0.6465	0.52033	0.60514	0.27906	0.45164	0.65419	0.78164	0.70032	0.30816	0.36918	0.48781	0.20283	0.30154	0.46258	0.57529	0.51498
REACTOME_RECRUITMENT_OF_NUMA_TO_MITOTIC_CENTROSOMES	0.45283	0.18803	0.15067	0.39554	0.03659	0.51938	0.8123	0.8942	0.63602	0.17509	0.22267	0.27537	0.45333	0.32093	0.71565	0.36219	0.41322	0.51134	0.32855	0.33168	0.14669	0.14911	0.10048	0.15465	0.08067	0.97261	0.97749	0.98599	0.98579	0.20666	0.47043	0.03893	0.53387	0.17313	0.19017	0.40189	0.50023	0.91962	0.42048	0.2903	0.90491	0.26042	0.44841	0.42869	0.23195	0.52928	0.86571	0.49255	0.95837
BIOCARTA_MCM_PATHWAY	0.45313	0.47822	0.80745	0.78175	0.39748	0.92026	0.19973	0.87838	0.59664	0.59406	0.67216	0.52776	0.19604	0.55018	0.12075	0.39483	0.25476	0.65012	0.84968	0.69468	0.61246	0.4173	0.52149	0.4812	0.65645	0.09224	0.79537	0.57892	0.71517	0.72625	0.5976	0.63497	0.60882	0.53743	0.83506	0.39813	0.77911	0.93546	0.97184	0.63542	0.93105	0.19758	0.37329	0.24208	0.33243	0.9476	0.42558	0.49239	0.41908
REACTOME_SIGNALING_BY_RHO_GTPASES	0.454735	0.2413	0.46461	0.3762	0.6964	0.74885	0.3329	0.65001	0.80337	0.30539	0.12847	0.51748	0.06669	0.92955	0.89679	0.82264	0.79213	0.30992	0.06041	0.02766	0.81264	0.38465	0.17043	0.11036	0.37593	0.22209	0.0784	0.29313	0.29383	0.88277	0.42302	0.33721	0.63202	0.82699	0.72286	0.95719	0.49113	0.91188	0.83637	0.83818	0.36671	0.90445	0.90815	0.94759	0.83256	0.56666	0.32872	0.74332	0.30732
KEGG_GLYCOSPHINGOLIPID_BIOSYNTHESIS_GANGLIO_SERIES	0.4548	0.22595	0.21074	0.03388	0.55113	0.17498	0.0049	0.25611	0.06791	0.02415	0.07681	0.00738	0.36174	0.18389	0.15918	0.07501	0.20183	0.20376	0.00491	0.02293	0.04327	0.18141	0.14504	0.47496	0.07489	0.45211	0.82205	0.65747	0.6232	0.04957	0.05293	0.01523	0.07815	0.09678	0.24274	0.06687	0.56925	0.35665	0.12731	0.95736	0.56633	0.04349	0.11982	0.0862	0.05505	0.85479	0.7577	0.80125	0.71947
BIOCARTA_EDG1_PATHWAY	0.45519	0.82698	0.95779	0.8861	0.96715	0.77826	0.27175	0.39334	0.36215	0.82116	0.28212	0.37978	0.42235	0.82656	0.21937	0.58517	0.60358	0.85645	0.73481	0.65861	0.73209	0.45794	0.50567	0.20444	0.36533	0.12965	0.5187	0.1532	0.09891	0.50576	0.14777	0.48291	0.21634	0.68225	0.63711	0.71976	0.2615	0.71551	0.17448	0.2953	0.1008	0.45636	0.26163	0.46671	0.46027	0.32586	0.19857	0.84283	0.07985
REACTOME_KINESINS	0.455395	0.38431	0.69521	0.37435	0.69411	0.36206	0.76948	0.47377	0.21478	0.37651	0.5854	0.19631	0.42614	0.37191	0.38023	0.47881	0.54176	0.18879	0.3385	0.57357	0.04383	0.26575	0.37895	0.28662	0.07302	0.65045	0.44151	0.33433	0.48065	0.0923	0.07404	0.11139	0.12822	0.17932	0.28475	0.16053	0.35051	0.27188	0.41871	0.38038	0.51412	0.30159	0.31978	0.24279	0.72797	0.15625	0.69486	0.54617	0.59401
KEGG_PHENYLALANINE_METABOLISM	0.456235	0.21817	0.29364	0.6722	0.03388	0.19914	0.22826	0.2745	0.30838	0.38416	0.82664	0.76911	0.59771	0.11693	0.35674	0.25502	0.25273	0.79845	0.82359	0.8029	0.52394	0.21914	0.10046	0.43418	0.35046	0.83341	0.96438	0.85759	0.85171	0.43637	0.51555	0.52289	0.66728	0.11236	0.30074	0.47578	0.18164	0.38286	0.34733	0.4127	0.40724	0.24074	0.38717	0.36464	0.41088	0.66287	0.74612	0.88751	0.76051
REACTOME_ELEVATION_OF_CYTOSOLIC_CA2_LEVELS	0.456285	0.35003	0.67187	0.15205	0.85746	0.88271	0.91145	0.48748	0.78556	0.04166	0.237	0.02205	0.9725	0.81735	0.83675	0.92717	0.76379	0.04448	0.09591	0.11236	0.11172	0.66523	0.36665	0.48706	0.3683	0.54091	0.71324	0.69264	0.47845	0.4481	0.28321	0.18379	0.25564	0.00257	0.00988	0.00393	0.00844	0.01689	0.29261	0.35071	0.23621	0.00073	0.00349	0.00263	0.00266	0.11465	0.15464	0.28614	0.19534
REACTOME_SHC_MEDIATED_SIGNALLING	0.457325	0.99106	0.32943	0.60065	0.91947	0.40502	0.02102	0.01507	0.08715	0.2921	0.27159	0.1383	0.94066	0.95944	0.34507	0.92591	0.57947	0.81169	0.6131	0.45139	0.47668	0.04264	0.04708	0.05135	0.0849	0.7264	0.34777	0.51196	0.33965	0.11939	0.08982	0.14543	0.08756	0.39967	0.11755	0.32599	0.17363	0.06216	0.21064	0.80287	0.02853	0.36621	0.74424	0.63772	0.7489	0.44775	0.31459	0.8456	0.33383
KEGG_NITROGEN_METABOLISM	0.4576	0.48849	0.87209	0.75617	0.09263	0.94603	0.80434	0.34473	0.56611	0.53866	0.32673	0.30637	0.98022	0.33369	0.26984	0.76862	0.1424	0.55818	0.61596	0.23782	0.59462	0.53319	0.30158	0.22657	0.35313	0.76212	0.3118	0.5514	0.84297	0.51123	0.40885	0.38032	0.3327	0.65336	0.80483	0.51817	0.57704	0.51441	0.50593	0.01669	0.25724	0.14419	0.02256	0.0362	0.04118	0.63866	0.31134	0.84831	0.23924
KEGG_MELANOMA	0.45767	0.75952	0.64633	0.65276	0.76677	0.74497	0.38866	0.46582	0.78002	0.34382	0.30739	0.45723	0.73402	0.89893	0.69195	0.73	0.83777	0.43692	0.34296	0.22404	0.93884	0.84182	0.20719	0.67729	0.89561	0.86351	0.9069	0.95262	0.74107	0.95714	0.74646	0.77677	0.95992	0.1562	0.066	0.40256	0.05423	0.12192	0.003	0.09962	0.03495	0.318	0.20786	0.52389	0.33984	0.59325	0.02865	0.7904	0.4015
REACTOME_ZINC_TRANSPORTERS	0.457785	0.59279	0.57061	0.61837	0.84323	0.75871	0.46937	0.22952	0.46792	0.88382	0.84391	0.94737	0.2639	0.75333	0.35761	0.40945	0.56314	0.25679	0.16541	0.08343	0.64146	0.44544	0.06249	0.17198	0.25541	0.03541	0.06298	0.08396	0.03313	0.476	0.21714	0.34565	0.19278	0.71317	0.81332	0.75225	0.49997	0.4932	0.41672	0.62816	0.36777	0.74408	0.58013	0.688	0.46813	0.16656	0.31798	0.4128	0.1503
REACTOME_TIE2_SIGNALING	0.45903	0.9947	0.60855	0.82911	0.87118	0.30457	0.00201	0.0191	0.02955	0.63323	0.73518	0.50563	0.989	0.53481	0.04768	0.26709	0.50019	0.9256	0.07367	0.3849	0.38713	0.04973	0.01159	0.28116	0.29855	0.3609	0.26396	0.31327	0.7101	0.09018	0.08333	0.12078	0.15481	0.34191	0.6287	0.52392	0.41439	0.29153	0.03596	0.30438	0.07158	0.47224	0.44621	0.5429	0.70474	0.07248	0.35085	0.40018	0.40945
REACTOME_ABC_FAMILY_PROTEINS_MEDIATED_TRANSPORT	0.459245	0.2737	0.61781	0.87444	0.20466	0.28201	0.49333	0.11595	0.35212	0.95881	0.79813	0.86129	0.87758	0.14562	0.75009	0.49003	0.69106	0.30498	0.50885	0.6498	0.13139	0.47729	0.53839	0.25994	0.53827	0.97475	0.70817	0.86402	0.58309	0.31853	0.48517	0.21716	0.57617	0.85666	0.6635	0.83718	0.95809	0.82483	0.4402	0.10201	0.80898	0.72685	0.13055	0.25968	0.20263	0.92237	0.90664	0.90178	0.77709
REACTOME_TGF_BETA_RECEPTOR_SIGNALING_IN_EMT_EPITHELIAL_TO_MESENCHYMAL_TRANSITION	0.459505	0.5977	0.3657	0.51043	0.32733	0.46906	0.71287	0.20527	0.80171	0.44666	0.20194	0.10043	0.98056	0.40197	0.85473	0.25164	0.72336	0.29874	0.48171	0.48619	0.17197	0.54475	0.42553	0.44501	0.35137	0.82338	0.54368	0.65209	0.71564	0.26165	0.74512	0.2526	0.60073	0.07386	0.05955	0.13374	0.07645	0.15583	0.22783	0.1245	0.6568	0.09098	0.0373	0.07562	0.07565	0.40679	0.93175	0.36802	0.71482
KEGG_REGULATION_OF_ACTIN_CYTOSKELETON	0.459945	0.31973	0.32459	0.60142	0.52846	0.20311	0.08168	0.9522	0.55139	0.65371	0.62459	0.98022	0.04862	0.36938	0.24386	0.2744	0.76304	0.10831	0.40739	0.63117	0.81024	0.30939	0.17531	0.72878	0.78579	0.84909	0.90509	0.81712	0.4807	0.46254	0.66275	0.75717	0.92721	0.48985	0.42904	0.8004	0.41996	0.11787	0.05234	0.19738	0.11444	0.70474	0.72331	0.92282	0.54931	0.26401	0.07227	0.52343	0.76288
REACTOME_OTHER_SEMAPHORIN_INTERACTIONS	0.460145	0.8313	0.90889	0.87791	0.696	0.79247	0.91157	0.20985	0.40643	0.53803	0.11485	0.32828	0.6878	0.4918	0.69746	0.57659	0.56097	0.16931	0.08291	0.10932	0.04486	0.06677	0.18078	0.23714	0.24167	0.11862	0.4287	0.32505	0.34386	0.09286	0.42077	0.04381	0.38276	0.16388	0.3244	0.25187	0.40686	0.08047	0.18157	0.27391	0.4316	0.18651	0.10734	0.20301	0.14029	0.59069	0.77975	0.50581	0.73418
BIOCARTA_HSP27_PATHWAY	0.46067	0.7624	0.83528	0.73023	0.5472	0.81606	0.36402	0.09665	0.05582	0.61162	0.33451	0.3108	0.41878	0.60872	0.13416	0.82477	0.09108	0.89714	0.16748	0.68632	0.3544	0.89397	0.49246	0.03883	0.14211	0.28182	0.89512	0.6139	0.37539	0.41612	0.01754	0.16138	0.03964	0.34184	0.19792	0.08968	0.34032	0.4794	0.24087	0.0152	0.01853	0.46472	0.6588	0.2805	0.33242	0.64177	0.22781	0.29495	0.0473
REACTOME_GPCR_LIGAND_BINDING	0.46121	0.16345	0.31352	0.06591	0.53984	0.21464	0.44686	0.9486	0.38293	0.32464	0.66987	0.24238	0.40839	0.33408	0.46138	0.31845	0.36932	0.06302	0.70783	0.55324	0.216	0.25817	0.44657	0.8018	0.47416	0.46008	0.85219	0.57529	0.96064	0.47092	0.75912	0.84732	0.533	0.44381	0.39092	0.11897	0.51743	0.31844	0.17234	0.26935	0.58777	0.19818	0.10414	0.03823	0.25469	0.63965	0.74654	0.4292	0.75298
REACTOME_GLYCEROPHOSPHOLIPID_BIOSYNTHESIS	0.461585	0.45151	0.83649	0.48339	0.96553	0.94877	0.8723	0.79255	0.97833	0.23879	0.21607	0.30585	0.00575	0.99108	0.98058	0.98384	0.98138	0.57521	0.47204	0.16701	0.92597	0.86845	0.53336	0.50471	0.72284	0.07072	0.09649	0.31583	0.0662	0.94444	0.70683	0.64972	0.84109	0.50762	0.45498	0.6201	0.59872	0.25693	0.64825	0.87028	0.39536	0.56024	0.84125	0.75034	0.81738	0.64572	0.32079	0.25434	0.70137
BIOCARTA_NTHI_PATHWAY	0.46164	0.45616	0.26759	0.40506	0.62947	0.34385	0.32866	0.35376	0.47693	0.83956	0.89374	0.90832	0.2379	0.08277	0.55641	0.02742	0.52274	0.11579	0.19647	0.39054	0.15997	0.69814	0.86699	0.74775	0.65285	0.44676	0.1892	0.55562	0.18624	0.41059	0.76539	0.60586	0.60072	0.89043	0.62007	0.30685	0.86824	0.36164	0.36973	0.13423	0.4553	0.32947	0.11064	0.23568	0.1015	0.72986	0.78815	0.23089	0.69387
REACTOME_FORMATION_OF_FIBRIN_CLOT_CLOTTING_CASCADE	0.461865	0.65493	0.235	0.17874	0.74043	0.09123	0.18821	0.0612	0.22906	0.53128	0.46876	0.51205	0.49721	0.51752	0.19797	0.19117	0.5372	0.30202	0.66132	0.5253	0.23388	0.22151	0.46141	0.27754	0.27925	0.21778	0.07631	0.13665	0.34146	0.31012	0.16948	0.17977	0.38466	0.73417	0.83658	0.615	0.92429	0.71696	0.85718	0.89732	0.77411	0.78319	0.60572	0.88644	0.59348	0.29917	0.7223	0.51295	0.70967
REACTOME_BILE_ACID_AND_BILE_SALT_METABOLISM	0.46197	0.84134	0.95944	0.97016	0.95667	0.71381	0.3771	0.88884	0.67218	0.97525	0.75639	0.87586	0.59176	0.94119	0.60048	0.95311	0.75977	0.91552	0.57639	0.6176	0.61958	0.00552	0.04123	0.84397	0.20868	0.73124	0.17119	0.39993	0.02983	0.52103	0.59262	0.29715	0.52443	0.89673	0.45554	0.79791	0.33424	0.08603	0.39375	0.37572	0.26976	0.73674	0.53098	0.65337	0.37055	0.34295	0.40089	0.00307	0.49054
REACTOME_INHIBITION_OF_VOLTAGE_GATED_CA2_CHANNELS_VIA_GBETA_GAMMA_SUBUNITS	0.462285	0.03949	0.86524	0.4729	0.19405	0.39032	0.50672	0.28564	0.28281	0.52942	0.46391	0.56298	0.22342	0.24906	0.34767	0.73119	0.18331	0.29648	0.97723	0.98244	0.28074	0.46236	0.15536	0.18627	0.24142	0.08854	0.8191	0.31922	0.39534	0.34696	0.22758	0.82069	0.19876	0.35954	0.51591	0.26609	0.45309	0.24986	0.25523	0.21354	0.33403	0.46494	0.28866	0.43149	0.61743	0.38471	0.50443	0.21864	0.33215
REACTOME_AMINE_LIGAND_BINDING_RECEPTORS	0.46279	0.18582	0.68868	0.1707	0.73888	0.69601	0.24129	0.86638	0.49233	0.04959	0.05279	0.0177	0.28715	0.66735	0.27765	0.67929	0.57811	0.46878	0.24031	0.55507	0.07312	0.01604	0.01591	0.16864	0.02944	0.66982	0.72701	0.40441	0.37157	0.15292	0.11381	0.026	0.25986	0.1948	0.31297	0.06027	0.81472	0.26078	0.67304	0.45128	0.61858	0.01745	0.05094	0.01022	0.0878	0.95421	0.75879	0.56061	0.94136
KEGG_P53_SIGNALING_PATHWAY	0.462865	0.79952	0.78154	0.71719	0.71326	0.90964	0.79453	0.29048	0.60811	0.72049	0.45534	0.23447	0.82139	0.55245	0.41309	0.29434	0.53301	0.38329	0.43731	0.3558	0.31258	0.8105	0.51027	0.2068	0.59568	0.88416	0.94243	0.72289	0.9865	0.51146	0.39517	0.32982	0.44159	0.44239	0.42995	0.31266	0.6461	0.53472	0.08919	0.00898	0.24397	0.04138	0.01031	0.00552	0.02864	0.94439	0.81971	0.86879	0.72474
BIOCARTA_IL22BP_PATHWAY	0.46301	0.37796	0.94008	0.83379	0.92786	0.95971	0.40554	0.07243	0.74549	0.63236	0.40753	0.51313	0.24141	0.96985	0.88455	0.82059	0.99592	0.24627	0.46193	0.38816	0.40204	0.67393	0.39379	0.46495	0.57839	0.05839	0.13724	0.11699	0.02273	0.78433	0.35779	0.45652	0.78972	0.7367	0.50545	0.80473	0.78042	0.4609	0.08821	0.15882	0.18208	0.38059	0.10504	0.35802	0.22342	0.94956	0.21768	0.64128	0.74254
REACTOME_TRANSLOCATION_OF_ZAP_70_TO_IMMUNOLOGICAL_SYNAPSE	0.46321	0.84386	0.63709	0.91568	0.65688	0.57329	0.40148	0.2783	0.39525	0.89665	0.432	0.68815	0.31696	0.44191	0.42178	0.85093	0.36574	0.39887	0.28806	0.08238	0.43197	0.59595	0.90976	0.70486	0.65511	0.5214	0.52778	0.38687	0.20845	0.3777	0.40524	0.87154	0.37019	0.40082	0.20413	0.53873	0.21419	0.44187	0.17628	0.60219	0.33937	0.55181	0.48543	0.61808	0.49521	0.30872	0.08596	0.28928	0.1664
KEGG_CELL_CYCLE	0.463745	0.6065	0.57394	0.79873	0.30698	0.79842	0.91136	0.39412	0.926	0.48501	0.46933	0.30365	0.8432	0.73041	0.7496	0.85781	0.65849	0.31535	0.13403	0.03865	0.61781	0.9524	0.75269	0.81046	0.92223	0.7384	0.83092	0.88734	0.87411	0.90026	0.89415	0.6975	0.94608	0.27069	0.16699	0.26161	0.22716	0.56997	0.48551	0.30047	0.83347	0.20206	0.17119	0.17975	0.33959	0.54424	0.34141	0.76455	0.68692
KEGG_SPHINGOLIPID_METABOLISM	0.46437	0.77998	0.81894	0.20385	0.84846	0.40045	0.14667	0.41662	0.1173	0.32677	0.16714	0.28863	0.39215	0.43416	0.09873	0.4404	0.11256	0.78598	0.73112	0.48613	0.45181	0.38509	0.24999	0.20476	0.12266	0.0415	0.35606	0.05428	0.67749	0.34853	0.16626	0.2545	0.08788	0.77494	0.78772	0.39584	0.81907	0.77118	0.89043	0.95696	0.71843	0.71087	0.63314	0.48004	0.89421	0.22605	0.6104	0.46569	0.16341
REACTOME_METAL_ION_SLC_TRANSPORTERS	0.464685	0.88341	0.87803	0.7923	0.98068	0.94907	0.51078	0.18356	0.58862	0.96118	0.83963	0.93389	0.41362	0.90468	0.38161	0.61626	0.5634	0.4694	0.23193	0.1448	0.69927	0.59289	0.1416	0.13338	0.2538	0.01403	0.06425	0.01705	0.04499	0.46715	0.28531	0.26805	0.16388	0.79315	0.68717	0.51825	0.62364	0.64118	0.43674	0.66373	0.37902	0.40429	0.17408	0.38514	0.16247	0.32235	0.33777	0.58125	0.16542
REACTOME_SIGNALING_BY_CONSTITUTIVELY_ACTIVE_EGFR	0.46492	0.32932	0.18658	0.4377	0.48672	0.16054	0.00506	0.04689	0.06896	0.4437	0.39425	0.44303	0.11063	0.35241	0.12421	0.20119	0.35688	0.16963	0.20943	0.41776	0.24202	0.15222	0.04168	0.03398	0.16028	0.58058	0.56471	0.65782	0.52669	0.11978	0.03616	0.11208	0.07966	0.78193	0.14563	0.40342	0.28218	0.22592	0.01635	0.16222	0.01606	0.72298	0.34367	0.46185	0.61768	0.32013	0.16184	0.35827	0.14148
BIOCARTA_G1_PATHWAY	0.465335	0.38043	0.41068	0.40604	0.21014	0.84418	0.99718	0.70753	0.89531	0.23639	0.09984	0.14296	0.90814	0.60038	0.85492	0.82788	0.23168	0.57095	0.64473	0.13223	0.78534	0.58968	0.27203	0.84481	0.87089	0.99279	0.91128	0.74968	0.90958	0.82776	0.98889	0.46048	0.9768	0.20374	0.25714	0.3745	0.1846	0.76287	0.15094	0.17558	0.71492	0.15724	0.04319	0.11237	0.06777	0.5766	0.66403	0.53731	0.56061
REACTOME_HEMOSTASIS	0.466105	0.48824	0.56705	0.70899	0.60224	0.28766	0.3571	0.20438	0.07488	0.41913	0.41953	0.17847	0.73134	0.21623	0.07886	0.34919	0.28209	0.50258	0.84093	0.94693	0.14238	0.55054	0.60854	0.35461	0.18322	0.4091	0.27059	0.02856	0.48706	0.06546	0.06432	0.16657	0.11136	0.14341	0.04813	0.02633	0.14922	0.16286	0.64019	0.60311	0.4481	0.048	0.09055	0.14897	0.16825	0.0346	0.46857	0.28997	0.48992
KEGG_VIRAL_MYOCARDITIS	0.46612	0.63456	0.85592	0.56406	0.51223	0.80412	0.57508	0.72972	0.70329	0.55822	0.81837	0.28672	0.73007	0.5015	0.31276	0.86474	0.29651	0.91129	0.87031	0.77353	0.82979	0.76509	0.63074	0.8487	0.77056	0.34129	0.48402	0.63222	0.67483	0.80045	0.46002	0.77736	0.64219	0.35723	0.39525	0.15991	0.43915	0.34872	0.32367	0.2234	0.56022	0.11544	0.12817	0.0431	0.05865	0.54479	0.14348	0.16268	0.55588
REACTOME_YAP1_AND_WWTR1_TAZ_STIMULATED_GENE_EXPRESSION	0.466805	0.11839	0.17659	0.05339	0.45006	0.20489	0.84945	0.63533	0.84107	0.31654	0.55796	0.27654	0.10048	0.51089	0.86562	0.27349	0.64188	0.01418	0.26917	0.03581	0.56159	0.77664	0.79632	0.72944	0.78745	0.63921	0.8006	0.69193	0.56132	0.73158	0.92647	0.94298	0.81914	0.11291	0.07967	0.10027	0.1075	0.31916	0.98177	0.92811	0.70544	0.1757	0.54194	0.27516	0.27821	0.15151	0.81579	0.25319	0.68701
REACTOME_NEGATIVE_REGULATORS_OF_RIG_I_MDA5_SIGNALING	0.467475	0.23247	0.07644	0.19886	0.33324	0.08119	0.18564	0.02713	0.09995	0.55172	0.75819	0.62779	0.74807	0.29088	0.40866	0.26665	0.43915	0.28742	0.21028	0.46737	0.05799	0.40757	0.46758	0.02162	0.06331	0.63164	0.03138	0.16236	0.12414	0.10558	0.03344	0.10903	0.03892	0.82111	0.71791	0.52051	0.60534	0.89852	0.30585	0.18065	0.07126	0.78144	0.37964	0.52925	0.16786	0.48418	0.39618	0.71579	0.06456
KEGG_MATURITY_ONSET_DIABETES_OF_THE_YOUNG	0.468675	0.49121	0.53904	0.89784	0.20495	0.30944	0.38528	0.15326	0.76142	0.82187	0.94881	0.67115	0.18171	0.20939	0.31125	0.24396	0.44828	0.11667	0.23145	0.10201	0.38652	0.60323	0.43716	0.19988	0.74781	0.1943	0.18435	0.16071	0.09415	0.42413	0.48002	0.7504	0.57106	0.40641	0.27129	0.4905	0.25096	0.1202	0.29929	0.08327	0.06317	0.37227	0.15954	0.33546	0.20475	0.08875	0.45351	0.21372	0.22574
REACTOME_INFLUENZA_VIRAL_RNA_TRANSCRIPTION_AND_REPLICATION	0.468775	0.26318	0.16421	0.44596	0.07369	0.3983	0.31743	0.63218	0.38262	0.26687	0.1497	0.09916	0.84702	0.21382	0.31025	0.53254	0.19623	0.97681	0.65629	0.84961	0.24879	0.75213	0.28604	0.11467	0.19396	0.69035	0.17857	0.34746	0.15482	0.63533	0.13147	0.17498	0.15894	0.07059	0.04924	0.07621	0.13849	0.11238	0.50393	0.57682	0.49701	0.26549	0.66022	0.4298	0.51676	0.08073	0.16213	0.06257	0.26517
REACTOME_AKT_PHOSPHORYLATES_TARGETS_IN_THE_CYTOSOL	0.468805	0.99216	0.99047	0.96175	0.9288	0.96201	0.93577	0.51268	0.7093	0.87562	0.42929	0.48391	0.56631	0.79696	0.47188	0.73269	0.27825	0.72373	0.38641	0.36379	0.43108	0.66633	0.47163	0.76785	0.71109	0.85961	0.72914	0.8789	0.67975	0.7433	0.66471	0.40339	0.56293	0.41348	0.31196	0.1132	0.28403	0.35663	0.19415	0.24794	0.32544	0.23276	0.23783	0.15083	0.19537	0.77309	0.65055	0.32754	0.32131
REACTOME_ACTIVATED_TAK1_MEDIATES_P38_MAPK_ACTIVATION	0.46893	0.35973	0.19943	0.13034	0.58121	0.54885	0.21237	0.28942	0.74077	0.29952	0.54926	0.7108	0.67654	0.53786	0.55951	0.16494	0.76736	0.91185	0.73444	0.80934	0.85318	0.91481	0.25247	0.15532	0.35986	0.41104	0.17998	0.28264	0.31365	0.92108	0.12789	0.27159	0.37743	0.25401	0.23949	0.37097	0.50268	0.74971	0.05164	0.03728	0.04995	0.37914	0.29775	0.73938	0.14449	0.65236	0.13605	0.51128	0.30507
REACTOME_GLYCOLYSIS	0.46981	0.95476	0.90904	0.99498	0.71863	0.46399	0.6212	0.24467	0.23821	0.97972	0.99479	0.85775	0.45171	0.51438	0.28267	0.71307	0.35403	0.83824	0.50621	0.53106	0.73893	0.46022	0.74203	0.62557	0.6998	0.4802	0.20985	0.2134	0.135	0.47791	0.38101	0.51377	0.37318	0.25353	0.2773	0.36066	0.1092	0.14433	0.61092	0.33939	0.2767	0.50347	0.78198	0.38817	0.72653	0.12425	0.7968	0.44438	0.26545
KEGG_PENTOSE_PHOSPHATE_PATHWAY	0.470005	0.48048	0.52496	0.7667	0.40703	0.20887	0.38328	0.6633	0.6248	0.7194	0.76577	0.69766	0.14224	0.39097	0.25344	0.63669	0.52413	0.86986	0.57646	0.67773	0.92834	0.57422	0.88467	0.95554	0.9108	0.05072	0.04571	0.08998	0.02304	0.75338	0.76434	0.94568	0.84509	0.09629	0.25389	0.44848	0.03031	0.21568	0.95334	0.92504	0.71661	0.30087	0.75925	0.54622	0.44316	0.05511	0.49828	0.63231	0.41568
BIOCARTA_AKT_PATHWAY	0.4702	0.73177	0.95625	0.89547	0.51553	0.97343	0.22747	0.5385	0.61825	0.71438	0.53675	0.51647	0.26411	0.71822	0.55635	0.66783	0.23418	0.61137	0.11308	0.30675	0.25412	0.25093	0.0726	0.26514	0.2987	0.92192	0.99238	0.9805	0.80092	0.37409	0.33016	0.20368	0.44327	0.55155	0.27533	0.23817	0.38201	0.66601	0.02755	0.09428	0.17262	0.40332	0.27507	0.12236	0.33677	0.94349	0.48586	0.52435	0.27342
REACTOME_APC_C_CDC20_MEDIATED_DEGRADATION_OF_CYCLIN_B	0.470535	0.2845	0.15826	0.45638	0.13866	0.12268	0.29036	0.73371	0.17972	0.34362	0.39074	0.22861	0.70035	0.1644	0.15477	0.24836	0.31717	0.70675	0.6762	0.72483	0.27032	0.25974	0.84451	0.35355	0.33225	0.2825	0.17441	0.15557	0.28435	0.1188	0.42999	0.38812	0.28164	0.38109	0.10255	0.18591	0.28925	0.35734	0.29844	0.1673	0.81789	0.28675	0.07761	0.17323	0.17233	0.21331	0.70974	0.4352	0.41563
BIOCARTA_NGF_PATHWAY	0.470835	0.28795	0.24975	0.15901	0.48617	0.27389	0.01196	0.01181	0.10402	0.17998	0.22291	0.08867	0.70311	0.62908	0.22401	0.38173	0.40469	0.65037	0.26222	0.65859	0.54999	0.12126	0.04573	0.14844	0.31699	0.33649	0.38144	0.45735	0.44316	0.27581	0.21534	0.20908	0.32449	0.2743	0.27662	0.56059	0.14583	0.08225	0.09784	0.75955	0.04041	0.5143	0.82153	0.64223	0.79481	0.17595	0.10007	0.14512	0.31747
KEGG_PROXIMAL_TUBULE_BICARBONATE_RECLAMATION	0.471335	0.78207	0.9081	0.87522	0.34491	0.65439	0.25827	0.62873	0.42948	0.84855	0.27586	0.37262	0.68736	0.10436	0.37699	0.14926	0.52726	0.08464	0.24989	0.67414	0.04794	0.11856	0.22918	0.82187	0.32516	0.05507	0.22606	0.05905	0.13233	0.06108	0.65235	0.25883	0.57146	0.32439	0.38067	0.11234	0.88906	0.42553	0.20998	0.01633	0.95913	0.0202	0.00501	0.0047	0.02873	0.92583	0.97643	0.72912	0.99661
BIOCARTA_ETS_PATHWAY	0.47174	0.14676	0.17341	0.51289	0.11399	0.31226	0.22766	0.7028	0.17888	0.14001	0.11936	0.17939	0.47058	0.16051	0.14277	0.43836	0.10957	0.72871	0.17918	0.50812	0.39866	0.75808	0.65	0.78686	0.68806	0.17429	0.09598	0.20824	0.51464	0.43514	0.62851	0.54153	0.7317	0.57014	0.32359	0.82667	0.19808	0.31	0.43822	0.59436	0.33193	0.77476	0.6432	0.58807	0.82348	0.08766	0.0645	0.20972	0.22212
BIOCARTA_CFTR_PATHWAY	0.472655	0.52433	0.27222	0.41309	0.38721	0.66948	0.93855	0.96244	0.75945	0.57223	0.41554	0.57587	0.83912	0.45639	0.68365	0.81898	0.60513	0.89774	0.88827	0.9125	0.39035	0.67091	0.63422	0.28198	0.4424	0.58293	0.27181	0.18562	0.67503	0.37157	0.3673	0.43598	0.48038	0.54999	0.49267	0.4844	0.60464	0.80994	0.87904	0.61795	0.99163	0.70846	0.53126	0.45523	0.64145	0.37539	0.92974	0.95204	0.50628
REACTOME_REGULATION_OF_INSULIN_LIKE_GROWTH_FACTOR_IGF_ACTIVITY_BY_INSULIN_LIKE_GROWTH_FACTOR_BINDING_PROTEINS_IGFBPS	0.472815	0.20562	0.48418	0.33008	0.12051	0.41552	0.9123	0.91526	0.62002	0.39425	0.93732	0.52915	0.20157	0.16097	0.40355	0.2935	0.1959	0.51688	0.83693	0.75674	0.77748	0.82984	0.78131	0.62148	0.54455	0.33439	0.8925	0.47327	0.81769	0.86358	0.68518	0.84538	0.56948	0.26032	0.32933	0.06011	0.66748	0.60536	0.64913	0.32644	0.90971	0.14052	0.43686	0.14669	0.20646	0.52161	0.84686	0.12129	0.86562
REACTOME_RESOLUTION_OF_AP_SITES_VIA_THE_SINGLE_NUCLEOTIDE_REPLACEMENT_PATHWAY	0.47304	0.16436	0.18504	0.09245	0.50602	0.49959	0.47205	0.148	0.91105	0.10584	0.03755	0.16141	0.04875	0.95152	0.89234	0.90786	0.75779	0.92177	0.45661	0.68003	0.89438	0.64416	0.42219	0.49398	0.69164	0.74378	0.37691	0.64089	0.20967	0.95678	0.66238	0.86399	0.77939	0.00741	0.00371	0.00579	0.00798	0.00093	0.35454	0.39579	0.10781	0.11156	0.5336	0.41274	0.5861	0.0357	0.0709	0.01559	0.47783
KEGG_SPLICEOSOME	0.47319	0.08748	0.52432	0.28713	0.45538	0.46165	0.75967	0.16956	0.24878	0.06229	0.08066	0.10178	0.03154	0.29891	0.2576	0.18284	0.4343	0.32468	0.34921	0.71099	0.07894	0.75868	0.4386	0.273	0.15309	0.25958	0.70572	0.38928	0.42722	0.07842	0.14511	0.06404	0.16279	0.15568	0.61163	0.27843	0.67212	0.6846	0.78532	0.18596	0.98242	0.07163	0.16544	0.11343	0.05625	0.65329	0.89563	0.55659	0.74827
REACTOME_NETRIN1_SIGNALING	0.473445	0.85071	0.69647	0.67565	0.98282	0.7142	0.20073	0.73354	0.58307	0.71119	0.42767	0.5722	0.51355	0.94374	0.54867	0.51192	0.87197	0.65432	0.85024	0.76618	0.81613	0.3557	0.74614	0.75576	0.62301	0.65824	0.51409	0.56557	0.43038	0.48759	0.43463	0.7519	0.62298	0.37177	0.38167	0.35885	0.44161	0.04416	0.10452	0.30941	0.0318	0.27632	0.12562	0.30933	0.14766	0.64058	0.0532	0.31778	0.22547
KEGG_NON_SMALL_CELL_LUNG_CANCER	0.47364	0.8956	0.93426	0.86358	0.97435	0.96802	0.3961	0.08704	0.77027	0.54051	0.2537	0.3576	0.4732	0.93292	0.75236	0.89584	0.81462	0.68314	0.2382	0.31941	0.63841	0.73744	0.10575	0.31656	0.7401	0.22893	0.47531	0.4217	0.07798	0.69948	0.56676	0.34781	0.76636	0.33853	0.09544	0.08255	0.23576	0.08952	0.00522	0.03643	0.02763	0.27821	0.107	0.16499	0.31339	0.79807	0.37852	0.35091	0.84406
REACTOME_PLATELET_AGGREGATION_PLUG_FORMATION	0.47379	0.10193	0.25717	0.15781	0.51514	0.34537	0.39224	0.19038	0.43785	0.03043	0.02408	0.04725	0.16929	0.86413	0.45231	0.61254	0.78611	0.67243	0.54149	0.53534	0.4691	0.50087	0.44342	0.45007	0.27596	0.37614	0.36458	0.33111	0.45683	0.33139	0.14589	0.14903	0.39067	0.03434	0.02524	0.10569	0.21626	0.28215	0.93194	0.95839	0.56621	0.03032	0.42857	0.43607	0.2294	0.39671	0.73442	0.88346	0.78746
BIOCARTA_IL7_PATHWAY	0.47386	0.81492	0.84982	0.87627	0.91841	0.7705	0.13809	0.06539	0.33156	0.90805	0.64121	0.80067	0.34174	0.6688	0.44031	0.32532	0.59539	0.14662	0.04119	0.32665	0.07758	0.38261	0.26835	0.59553	0.2789	0.61924	0.45616	0.60017	0.24819	0.26833	0.22163	0.28094	0.39771	0.76361	0.26866	0.51595	0.59171	0.52744	0.09946	0.49365	0.55953	0.35133	0.26662	0.31908	0.14624	0.71506	0.20519	0.18898	0.83507
REACTOME_KERATAN_SULFATE_BIOSYNTHESIS	0.47437	0.793	0.83771	0.88916	0.83886	0.7335	0.1589	0.51709	0.26538	0.92322	0.65436	0.90866	0.64837	0.57884	0.37602	0.46738	0.73596	0.13377	0.02931	0.06299	0.54045	0.12083	0.42112	0.4831	0.413	0.1152	0.15718	0.1412	0.10443	0.26271	0.35851	0.36354	0.4782	0.62539	0.65121	0.61329	0.83695	0.94831	0.71935	0.73866	0.55559	0.37268	0.30669	0.55396	0.13909	0.94858	0.67352	0.90913	0.66579
BIOCARTA_SKP2E2F_PATHWAY	0.47448	0.11371	0.18578	0.21942	0.05005	0.56285	0.8956	0.90958	0.72016	0.11911	0.17014	0.13369	0.5258	0.15643	0.51745	0.29544	0.3152	0.55735	0.31199	0.28266	0.70855	0.48748	0.35471	0.4487	0.68847	0.94676	0.75745	0.22167	0.65035	0.68781	0.91696	0.45162	0.90206	0.33949	0.49206	0.62501	0.37323	0.78263	0.40618	0.26054	0.78073	0.39633	0.30799	0.4438	0.52912	0.26409	0.51471	0.89561	0.57844
REACTOME_EXTENSION_OF_TELOMERES	0.475735	0.37171	0.35208	0.43916	0.36033	0.28342	0.83004	0.57431	0.52282	0.43549	0.33258	0.41029	0.70486	0.10655	0.80281	0.15422	0.40245	0.0333	0.04172	0.06747	0.02976	0.26826	0.15326	0.11605	0.13339	0.90347	0.80069	0.96578	0.98333	0.02957	0.3148	0.01505	0.24894	0.20181	0.09003	0.10337	0.59601	0.62782	0.83333	0.84495	0.99836	0.0658	0.02491	0.13226	0.04707	0.74736	0.96956	0.52099	0.97301
REACTOME_CIRCADIAN_CLOCK	0.476905	0.2093	0.21861	0.17648	0.30214	0.44036	0.77035	0.64362	0.84592	0.39666	0.8033	0.27285	0.39712	0.43751	0.80803	0.47758	0.76593	0.38671	0.7068	0.56825	0.67329	0.6403	0.508	0.42642	0.50797	0.42558	0.24289	0.25612	0.46005	0.77072	0.75147	0.40082	0.70298	0.17998	0.10647	0.17023	0.29767	0.86584	0.55899	0.55871	0.7056	0.14865	0.40003	0.29995	0.17125	0.28955	0.55607	0.66877	0.60943
REACTOME_TRANSPORT_OF_MATURE_MRNA_DERIVED_FROM_AN_INTRONLESS_TRANSCRIPT	0.47708	0.46038	0.40876	0.40979	0.37173	0.51171	0.59755	0.59323	0.97831	0.608	0.85932	0.55033	0.86005	0.38552	0.85893	0.16237	0.78066	0.16787	0.24352	0.19984	0.55734	0.44865	0.10411	0.5156	0.53998	0.73589	0.60401	0.86037	0.82989	0.55952	0.79998	0.32908	0.93903	0.12086	0.37564	0.39125	0.44132	0.31415	0.74032	0.31548	0.6368	0.30144	0.44962	0.56708	0.12267	0.563	0.60027	0.79338	0.91357
KEGG_DNA_REPLICATION	0.47746	0.36882	0.2763	0.72304	0.36427	0.14056	0.30567	0.53788	0.3029	0.61473	0.4589	0.65273	0.63625	0.0583	0.31577	0.14539	0.40403	0.01822	0.08872	0.20111	0.02151	0.12419	0.34033	0.29522	0.17126	0.8507	0.84988	0.88566	0.96053	0.01474	0.40669	0.03728	0.22576	0.42596	0.35178	0.3766	0.84703	0.84924	0.74168	0.66508	0.99264	0.15491	0.02939	0.15221	0.04092	0.75931	0.87922	0.76667	0.93352
REACTOME_CHROMOSOME_MAINTENANCE	0.47797	0.29495	0.28622	0.19166	0.52179	0.4784	0.75663	0.48772	0.64527	0.32167	0.47754	0.48392	0.30652	0.33843	0.84933	0.3994	0.64849	0.0327	0.07103	0.07921	0.14187	0.45766	0.40141	0.14881	0.2959	0.54469	0.5342	0.89721	0.87754	0.15903	0.30497	0.07215	0.41418	0.55312	0.49011	0.29455	0.76272	0.72203	0.61304	0.61244	0.75218	0.22056	0.14352	0.24538	0.1722	0.92223	0.88611	0.83361	0.88849
REACTOME_ANTIGEN_PRESENTATION_FOLDING_ASSEMBLY_AND_PEPTIDE_LOADING_OF_CLASS_I_MHC	0.47931	0.30993	0.58846	0.23276	0.53909	0.95454	0.93994	0.5864	0.97987	0.25974	0.56489	0.38372	0.47261	0.85164	0.92647	0.95559	0.68633	0.29975	0.50543	0.24106	0.70358	0.68793	0.37384	0.15632	0.45003	0.38562	0.3404	0.66026	0.54927	0.90263	0.60603	0.66989	0.64911	0.35277	0.20803	0.33431	0.35942	0.51876	0.24037	0.33517	0.41265	0.37067	0.34621	0.30311	0.28353	0.81691	0.23915	0.19119	0.40185
BIOCARTA_TCAPOPTOSIS_PATHWAY	0.479785	0.98399	0.6718	0.97033	0.70405	0.62058	0.15961	0.19793	0.11366	0.93062	0.56892	0.90565	0.39127	0.75447	0.18025	0.98708	0.07419	0.74398	0.73316	0.19742	0.71745	0.38406	0.61407	0.10244	0.17644	0.47893	0.48064	0.62175	0.17639	0.29525	0.04183	0.61043	0.02994	0.49042	0.22424	0.82419	0.10073	0.40524	0.09002	0.34111	0.00583	0.72365	0.76232	0.94873	0.75504	0.33874	0.0273	0.51723	0.00745
REACTOME_TANDEM_PORE_DOMAIN_POTASSIUM_CHANNELS	0.48085	0.35421	0.62015	0.33302	0.71323	0.40096	0.56493	0.34788	0.52249	0.50917	0.466	0.22713	0.87738	0.80853	0.94468	0.95068	0.58313	0.29396	0.59718	0.78011	0.31787	0.06863	0.32432	0.17956	0.14662	0.54958	0.61183	0.3639	0.66532	0.25766	0.33572	0.22212	0.30359	0.43095	0.38288	0.18218	0.75834	0.15232	0.09124	0.19545	0.11959	0.11854	0.08619	0.03835	0.13235	0.70738	0.76331	0.37387	0.59558
REACTOME_RNA_POL_I_RNA_POL_III_AND_MITOCHONDRIAL_TRANSCRIPTION	0.481435	0.79502	0.48818	0.93407	0.65473	0.30018	0.27982	0.18739	0.09957	0.96124	0.90667	0.92945	0.51832	0.44164	0.10544	0.4365	0.24538	0.88404	0.69583	0.92086	0.32587	0.66936	0.53849	0.18979	0.29164	0.45434	0.2537	0.09922	0.12569	0.18828	0.09229	0.27267	0.09666	0.23037	0.1567	0.20299	0.06744	0.10673	0.38722	0.65786	0.1267	0.4055	0.74939	0.48719	0.62287	0.0502	0.37145	0.35376	0.13772
REACTOME_METABOLISM_OF_POLYAMINES	0.481875	0.7967	0.82026	0.80863	0.43641	0.70823	0.40663	0.08226	0.07707	0.58316	0.68626	0.653	0.76441	0.5208	0.26231	0.24851	0.16112	0.63155	0.36212	0.58999	0.10544	0.36255	0.23856	0.17263	0.07222	0.84829	0.52798	0.8912	0.31653	0.26247	0.08344	0.07902	0.12371	0.58713	0.87626	0.55755	0.89547	0.66411	0.44046	0.16146	0.37024	0.61598	0.36521	0.45907	0.5259	0.91627	0.77282	0.37344	0.29301
REACTOME_SIGNALING_BY_GPCR	0.481875	0.1808	0.2941	0.06155	0.65247	0.34901	0.62635	0.91612	0.62151	0.18482	0.68802	0.15681	0.55185	0.56225	0.72417	0.28232	0.82253	0.15334	0.64499	0.58433	0.35633	0.35986	0.31079	0.5418	0.40383	0.48197	0.66019	0.38916	0.80355	0.5653	0.71467	0.60658	0.74803	0.20317	0.16895	0.08393	0.33944	0.26174	0.24581	0.28606	0.43408	0.06599	0.06804	0.07302	0.05355	0.60552	0.75632	0.71763	0.90895
REACTOME_ROLE_OF_DCC_IN_REGULATING_APOPTOSIS	0.48224	0.97981	0.59814	0.7608	0.74822	0.71246	0.86965	0.19036	0.54846	0.91548	0.87808	0.4132	0.5334	0.40574	0.6161	0.49374	0.65857	0.60002	0.39909	0.4382	0.49568	0.89899	0.87939	0.31144	0.77666	0.4376	0.10022	0.25099	0.33922	0.50106	0.76863	0.90489	0.52166	0.35388	0.11567	0.09166	0.22758	0.02912	0.00575	0.01211	0.01132	0.26706	0.13428	0.09607	0.17241	0.44835	0.24298	0.04529	0.28806
BIOCARTA_RB_PATHWAY	0.48254	0.81389	0.60023	0.68254	0.27486	0.95422	0.90357	0.21612	0.73902	0.60893	0.33014	0.44263	0.96166	0.44033	0.41632	0.70419	0.21523	0.72141	0.3561	0.1758	0.54828	0.69185	0.13669	0.20588	0.4068	0.95619	0.69136	0.36645	0.95962	0.6531	0.65273	0.42524	0.52524	0.1815	0.098	0.16995	0.08381	0.72521	0.52506	0.06511	0.3505	0.10529	0.10977	0.14131	0.12846	0.76196	0.83483	0.97099	0.25041
REACTOME_CYTOKINE_SIGNALING_IN_IMMUNE_SYSTEM	0.482595	0.17951	0.37661	0.10244	0.5023	0.7326	0.11463	0.1213	0.42071	0.11841	0.4306	0.22874	0.71594	0.7394	0.64708	0.83645	0.57321	0.69597	0.17423	0.35425	0.33778	0.17068	0.03091	0.04097	0.03786	0.8064	0.28963	0.61808	0.87318	0.40572	0.05931	0.13451	0.10033	0.3568	0.52647	0.39552	0.88905	0.71801	0.71118	0.77129	0.36117	0.31104	0.67867	0.58716	0.3938	0.90358	0.58277	0.93124	0.58064
REACTOME_RORA_ACTIVATES_CIRCADIAN_EXPRESSION	0.483115	0.26967	0.10917	0.09232	0.41226	0.19326	0.82033	0.43027	0.833	0.29646	0.74667	0.28664	0.17909	0.66471	0.67446	0.43614	0.57806	0.17275	0.60631	0.18225	0.8649	0.92755	0.92489	0.88974	0.87063	0.78456	0.93692	0.87887	0.72596	0.93071	0.94306	0.94992	0.87647	0.06729	0.0099	0.04666	0.05792	0.28096	0.67516	0.88587	0.77188	0.08671	0.61413	0.32267	0.16418	0.10641	0.315	0.19725	0.39098
BIOCARTA_RNA_PATHWAY	0.484375	0.95193	0.31479	0.66585	0.44458	0.24398	0.25498	0.70467	0.18394	0.74259	0.59189	0.54702	0.76204	0.20881	0.20232	0.41711	0.15802	0.56237	0.40433	0.87341	0.09054	0.3003	0.73589	0.89489	0.57315	0.45412	0.0393	0.20818	0.223	0.20321	0.66228	0.68614	0.47803	0.63124	0.30874	0.30723	0.62173	0.45393	0.57281	0.68339	0.77205	0.34071	0.13304	0.13472	0.18849	0.8277	0.48965	0.64915	0.59868
REACTOME_NEP_NS2_INTERACTS_WITH_THE_CELLULAR_EXPORT_MACHINERY	0.484855	0.71569	0.61638	0.66579	0.62526	0.50498	0.43019	0.48673	0.954	0.75252	0.64536	0.6042	0.96242	0.47141	0.70921	0.26063	0.7732	0.30286	0.55089	0.28151	0.56841	0.37034	0.30487	0.49339	0.43763	0.31042	0.33196	0.44533	0.49382	0.38245	0.59635	0.34029	0.79033	0.39738	0.60843	0.57216	0.70019	0.36423	0.65292	0.41889	0.55567	0.43707	0.37572	0.62604	0.11782	0.43065	0.37972	0.58393	0.87593
REACTOME_INFLUENZA_LIFE_CYCLE	0.48501	0.50237	0.33231	0.60514	0.18475	0.55471	0.38472	0.67364	0.70118	0.52768	0.37258	0.23059	0.97426	0.33925	0.48572	0.5197	0.35758	0.90372	0.59515	0.66067	0.31332	0.5017	0.19775	0.10215	0.1422	0.67094	0.26526	0.42537	0.28431	0.54605	0.13935	0.13648	0.21831	0.11302	0.119	0.15437	0.25953	0.13353	0.64713	0.63732	0.49161	0.33674	0.69237	0.60118	0.32921	0.1403	0.16006	0.1199	0.39566
BIOCARTA_MTA3_PATHWAY	0.485175	0.2443	0.65141	0.73908	0.36986	0.5864	0.96607	0.24714	0.79573	0.34184	0.59597	0.50479	0.74919	0.60189	0.95062	0.67908	0.88896	0.35033	0.26167	0.16803	0.45148	0.6624	0.72003	0.21624	0.61454	0.83074	0.45313	0.49154	0.41508	0.35237	0.21818	0.12222	0.39417	0.57318	0.42164	0.66777	0.52606	0.57287	0.84588	0.22318	0.28542	0.6923	0.61018	0.81226	0.64941	0.71489	0.49427	0.42446	0.59767
KEGG_ENDOCYTOSIS	0.485265	0.20363	0.09045	0.50891	0.14552	0.1548	0.12975	0.6875	0.27544	0.60072	0.93992	0.83009	0.4221	0.21916	0.07775	0.13828	0.45943	0.31164	0.79005	0.41087	0.65652	0.44416	0.90611	0.61252	0.67863	0.16468	0.65981	0.45222	0.71906	0.43375	0.47648	0.76191	0.54358	0.27659	0.17068	0.5982	0.11876	0.44763	0.52605	0.52352	0.25002	0.39477	0.33786	0.72979	0.17476	0.18401	0.10819	0.55053	0.27524
KEGG_BASAL_TRANSCRIPTION_FACTORS	0.485405	0.54941	0.06369	0.28286	0.45018	0.16379	0.07472	0.76645	0.61564	0.49153	0.4807	0.83677	0.57199	0.18682	0.1402	0.04084	0.73433	0.62905	0.77464	0.9489	0.73004	0.37431	0.45671	0.89561	0.6876	0.4875	0.31691	0.58918	0.53195	0.31386	0.71418	0.75939	0.76089	0.22879	0.44028	0.38467	0.53189	0.4868	0.08516	0.52523	0.78822	0.45139	0.60504	0.65093	0.47386	0.28152	0.38517	0.4843	0.91357
REACTOME_ACTIVATION_OF_THE_AP1_FAMILY_OF_TRANSCRIPTION_FACTORS	0.48585	0.0601	0.12212	0.07383	0.20803	0.21591	0.45939	0.39794	0.32028	0.10031	0.34137	0.15982	0.49177	0.42061	0.41303	0.44976	0.48516	0.90236	0.95581	0.968	0.64456	0.66596	0.55291	0.33429	0.41159	0.5762	0.35803	0.40973	0.33746	0.62795	0.54186	0.47744	0.43891	0.0971	0.17489	0.25996	0.19947	0.33344	0.7103	0.53296	0.28339	0.30908	0.69381	0.57569	0.29823	0.25777	0.74554	0.60168	0.5606
REACTOME_RNA_POL_III_TRANSCRIPTION	0.48671	0.74651	0.48164	0.82542	0.65822	0.43792	0.40979	0.24775	0.45627	0.86928	0.82545	0.75916	0.97045	0.67271	0.3664	0.77876	0.50145	0.9616	0.93652	0.88913	0.80552	0.64446	0.66139	0.55753	0.62202	0.17091	0.07414	0.06311	0.01063	0.73747	0.35529	0.7829	0.31985	0.27102	0.23723	0.38293	0.14921	0.2447	0.12898	0.54183	0.07687	0.49291	0.46169	0.45034	0.44241	0.11365	0.13533	0.26596	0.12246
BIOCARTA_TALL1_PATHWAY	0.48864	0.44883	0.53455	0.47044	0.36537	0.77824	0.62109	0.83328	0.53266	0.3613	0.90288	0.44124	0.38358	0.46574	0.33536	0.84029	0.21161	0.97593	0.81779	0.85578	0.43791	0.56935	0.4695	0.57887	0.53274	0.55285	0.26242	0.25223	0.44623	0.57488	0.59442	0.67148	0.36762	0.29117	0.25386	0.21808	0.32012	0.64976	0.73217	0.8434	0.62387	0.32354	0.49318	0.30423	0.57105	0.42033	0.59742	0.52309	0.34661
KEGG_SULFUR_METABOLISM	0.48915	0.51903	0.26929	0.46456	0.21587	0.1311	0.00526	0.1998	0.17762	0.62083	0.68792	0.70942	0.48968	0.1716	0.13701	0.12058	0.24263	0.16405	0.23238	0.41508	0.29643	0.01158	0.11045	0.0737	0.10422	0.74934	0.65645	0.28062	0.77348	0.23091	0.22177	0.18837	0.33727	0.77627	0.54149	0.34757	0.68411	0.50413	0.68478	0.20354	0.46736	0.68095	0.63348	0.55605	0.70561	0.76636	0.57591	0.29257	0.53428
BIOCARTA_PPARA_PATHWAY	0.48921	0.44271	0.59535	0.54447	0.56138	0.50409	0.85572	0.22795	0.53758	0.73286	0.79188	0.72043	0.06171	0.53896	0.80727	0.48886	0.58676	0.49623	0.52774	0.41076	0.70601	0.48577	0.53394	0.36598	0.56786	0.14272	0.2721	0.10467	0.07283	0.519	0.62942	0.60257	0.6207	0.77617	0.43027	0.5995	0.31923	0.49423	0.28891	0.5208	0.3492	0.75975	0.74987	0.87944	0.80111	0.15338	0.48799	0.29418	0.22276
KEGG_BUTANOATE_METABOLISM	0.48972	0.24714	0.51605	0.61972	0.30878	0.26055	0.87731	0.46171	0.50604	0.48457	0.24883	0.56471	0.46958	0.66629	0.12513	0.85552	0.2168	0.1524	0.14028	0.15249	0.03994	0.0119	0.00738	0.28766	0.03157	0.25281	0.68679	0.70969	0.44166	0.19446	0.19767	0.022	0.43304	0.47141	0.51662	0.2669	0.36386	0.0554	0.41886	0.22004	0.26201	0.37859	0.61504	0.60543	0.37852	0.51565	0.53438	0.01386	0.56949
REACTOME_BETA_DEFENSINS	0.489805	0.59738	0.44871	0.58463	0.29389	0.23001	0.60204	0.39034	0.39061	0.58796	0.87506	0.71306	0.71937	0.23911	0.18449	0.29813	0.4452	0.55532	0.49814	0.72124	0.16986	0.26745	0.55887	0.40419	0.40812	0.70822	0.19481	0.49148	0.43531	0.17071	0.3602	0.49398	0.38509	0.53988	0.77453	0.63259	0.40413	0.54265	0.42722	0.44038	0.1912	0.62925	0.582	0.32206	0.60877	0.07318	0.59736	0.27741	0.30858
KEGG_TOLL_LIKE_RECEPTOR_SIGNALING_PATHWAY	0.490275	0.82233	0.87372	0.66849	0.72121	0.98364	0.31642	0.55337	0.75233	0.52412	0.75394	0.56519	0.9672	0.74747	0.70501	0.77315	0.76218	0.99485	0.42305	0.92948	0.33387	0.60564	0.04721	0.24193	0.34318	0.89433	0.81572	0.91704	0.42919	0.75454	0.31037	0.28425	0.56542	0.18275	0.36061	0.14353	0.70119	0.53119	0.01773	0.15332	0.32607	0.24426	0.2599	0.3199	0.09856	0.94722	0.71245	0.6267	0.96259
BIOCARTA_RAB_PATHWAY	0.49046	0.80145	0.80124	0.89727	0.80417	0.72431	0.95777	0.63724	0.71317	0.77112	0.87793	0.80314	0.77267	0.90705	0.87461	0.94917	0.84592	0.97127	0.41185	0.47515	0.89141	0.48189	0.50591	0.82162	0.7066	0.8052	0.88786	0.85234	0.78599	0.96043	0.86268	0.7102	0.86146	0.32485	0.16618	0.76553	0.09553	0.11413	0.62981	0.59443	0.4436	0.74131	0.89563	0.87028	0.84023	0.22996	0.27408	0.88897	0.26816
BIOCARTA_VITCB_PATHWAY	0.492255	0.03502	0.32406	0.2281	0.11395	0.28182	0.21575	0.20992	0.65716	0.33709	0.49035	0.44801	0.18647	0.31125	0.91304	0.62349	0.74848	0.61478	0.97529	0.98225	0.87739	0.04341	0.10352	0.16058	0.30819	0.51633	0.77523	0.80311	0.78128	0.7314	0.39546	0.38393	0.75381	0.43545	0.63704	0.80055	0.54495	0.13946	0.10709	0.06071	0.14426	0.69217	0.35784	0.64939	0.65985	0.63538	0.15852	0.20545	0.83317
REACTOME_REGULATED_PROTEOLYSIS_OF_P75NTR	0.49259	0.41941	0.34992	0.50516	0.15877	0.70232	0.2827	0.71924	0.31754	0.27233	0.23669	0.15184	0.64947	0.14412	0.18083	0.20148	0.25639	0.73961	0.60446	0.78165	0.0848	0.38504	0.51218	0.36748	0.38572	0.44507	0.46851	0.28326	0.30517	0.25838	0.52889	0.32778	0.44752	0.51197	0.44849	0.41387	0.82265	0.52081	0.58563	0.43422	0.90488	0.25717	0.28388	0.192	0.45735	0.6674	0.40494	0.76838	0.84187
REACTOME_METABOLISM_OF_PROTEINS	0.49284	0.24254	0.58466	0.60398	0.32104	0.86855	0.46664	0.39226	0.35993	0.35159	0.66499	0.31296	0.67173	0.77946	0.55491	0.88519	0.25815	0.70195	0.12911	0.1526	0.24321	0.8057	0.70753	0.35596	0.44028	0.44502	0.58222	0.82287	0.58358	0.755	0.28802	0.29814	0.29959	0.23504	0.13909	0.37453	0.19105	0.22111	0.23257	0.80331	0.3369	0.4601	0.50334	0.44941	0.50815	0.49334	0.32288	0.1372	0.31572
BIOCARTA_PTC1_PATHWAY	0.49526	0.27456	0.10651	0.34068	0.13466	0.06908	0.3088	0.34832	0.29094	0.30103	0.25367	0.36609	0.76655	0.14997	0.16465	0.28539	0.35033	0.57186	0.84815	0.5495	0.56993	0.40733	0.49507	0.73186	0.33639	0.78613	0.55032	0.33361	0.89541	0.14321	0.54929	0.44655	0.56121	0.39756	0.17124	0.38293	0.29539	0.66486	0.52584	0.64732	0.67676	0.65205	0.66588	0.7608	0.84036	0.11697	0.46853	0.57333	0.73852
REACTOME_NOTCH1_INTRACELLULAR_DOMAIN_REGULATES_TRANSCRIPTION	0.495495	0.43774	0.31357	0.36604	0.23007	0.32941	0.17379	0.15248	0.31937	0.55752	0.38134	0.28429	0.35945	0.20037	0.26268	0.1618	0.30989	0.1761	0.25224	0.40112	0.19031	0.47392	0.60598	0.23787	0.29221	0.83045	0.62612	0.68485	0.62417	0.32929	0.2468	0.39146	0.34233	0.5358	0.42321	0.23965	0.66032	0.22763	0.41399	0.0929	0.26956	0.17466	0.21241	0.10701	0.06191	0.69503	0.34706	0.13369	0.57378
KEGG_GLYCOSAMINOGLYCAN_BIOSYNTHESIS_CHONDROITIN_SULFATE	0.49563	0.80246	0.24895	0.53772	0.25222	0.36482	0.09287	0.37543	0.50773	0.63344	0.6033	0.65965	0.94846	0.27908	0.51343	0.24975	0.53568	0.22617	0.12894	0.0989	0.35839	0.38804	0.29428	0.12946	0.33245	0.99911	0.85439	0.96703	0.99692	0.49568	0.2881	0.20675	0.33033	0.37037	0.16692	0.24596	0.31611	0.3356	0.30266	0.27153	0.38332	0.44661	0.26311	0.46799	0.2265	0.31315	0.70345	0.21958	0.79742
REACTOME_POL_SWITCHING	0.495775	0.21834	0.19074	0.38663	0.32311	0.3924	0.92478	0.62901	0.86764	0.27797	0.25829	0.26614	0.5081	0.34153	0.84417	0.39203	0.91743	0.22663	0.10409	0.3317	0.29482	0.89919	0.42493	0.45344	0.69304	0.76797	0.5908	0.78091	0.89213	0.38248	0.79897	0.26894	0.84175	0.15668	0.18466	0.22234	0.32899	0.31456	0.47322	0.79284	0.96837	0.1034	0.06351	0.17114	0.22005	0.29582	0.70664	0.42875	0.91566
BIOCARTA_CCR3_PATHWAY	0.49609	0.88602	0.7763	0.42125	0.98249	0.74222	0.1902	0.37458	0.44893	0.83856	0.38875	0.27638	0.64485	0.76944	0.46671	0.43884	0.73815	0.62578	0.61879	0.56052	0.42603	0.82582	0.94002	0.60835	0.63441	0.13585	0.08546	0.02168	0.03188	0.43401	0.53924	0.64107	0.33087	0.85583	0.84497	0.45155	0.91317	0.42595	0.54806	0.56419	0.39561	0.2211	0.21343	0.27112	0.30227	0.85395	0.69805	0.76941	0.64813
REACTOME_DNA_REPAIR	0.49617	0.19932	0.06767	0.19888	0.18781	0.18124	0.82112	0.50525	0.81728	0.19348	0.08748	0.37699	0.75931	0.41093	0.84019	0.3665	0.77564	0.43974	0.11088	0.2826	0.41878	0.97254	0.32806	0.2615	0.46822	0.92276	0.62509	0.93366	0.39314	0.79067	0.55535	0.3532	0.60338	0.01784	0.01457	0.05678	0.06384	0.04375	0.61532	0.6812	0.80391	0.19463	0.47915	0.46946	0.53172	0.02983	0.40715	0.12737	0.74915
REACTOME_SLC_MEDIATED_TRANSMEMBRANE_TRANSPORT	0.496365	0.89865	0.97036	0.67615	0.9004	0.94213	0.51911	0.36134	0.7603	0.80393	0.81639	0.7519	0.91931	0.75401	0.59062	0.62788	0.57514	0.87454	0.77943	0.67866	0.84372	0.77257	0.68926	0.3687	0.45965	0.255	0.60618	0.15934	0.38918	0.51088	0.43974	0.6088	0.42038	0.47178	0.81707	0.2917	0.85865	0.72098	0.92983	0.87837	0.79976	0.37662	0.60945	0.63748	0.41518	0.88131	0.80865	0.77922	0.74382
REACTOME_SYNTHESIS_OF_SUBSTRATES_IN_N_GLYCAN_BIOSYTHESIS	0.49718	0.91096	0.84759	0.79097	0.625	0.61173	0.49204	0.71719	0.1493	0.85833	0.87021	0.89406	0.83684	0.73038	0.26331	0.61988	0.26997	0.99823	0.59098	0.56018	0.72728	0.3111	0.42794	0.63047	0.44584	0.89907	0.38337	0.55946	0.32189	0.55677	0.41279	0.67026	0.53724	0.74248	0.85977	0.83974	0.61088	0.62311	0.67234	0.96882	0.3963	0.85048	0.98019	0.8705	0.84869	0.24787	0.3003	0.38102	0.31132
REACTOME_SIGNALING_BY_EGFR_IN_CANCER	0.497525	0.74697	0.84467	0.70009	0.83053	0.89424	0.9221	0.47229	0.57357	0.1932	0.1247	0.1547	0.58567	0.91542	0.75315	0.94522	0.73885	0.83187	0.61568	0.65665	0.5679	0.33273	0.11585	0.08108	0.13054	0.54341	0.61166	0.39747	0.6921	0.2874	0.10909	0.19788	0.20952	0.03664	0.02792	0.09442	0.0432	0.36152	0.37295	0.53472	0.27961	0.04849	0.1551	0.21431	0.06845	0.48641	0.91188	0.94242	0.50658
REACTOME_MITOCHONDRIAL_PROTEIN_IMPORT	0.49868	0.02788	0.42973	0.38082	0.0518	0.58405	0.95683	0.90316	0.52676	0.36375	0.68972	0.35118	0.21667	0.34449	0.54419	0.8718	0.21211	0.41494	0.77665	0.7482	0.46357	0.88794	0.95729	0.86924	0.66297	0.31871	0.86146	0.50259	0.27248	0.66033	0.82862	0.88817	0.56886	0.22004	0.42276	0.27631	0.19835	0.63189	0.75312	0.73293	0.6784	0.49073	0.66921	0.33036	0.56254	0.46843	0.66832	0.80381	0.24457
BIOCARTA_NFAT_PATHWAY	0.498835	0.66172	0.84713	0.78235	0.61279	0.75117	0.41049	0.13511	0.56369	0.784	0.767	0.76453	0.32719	0.50844	0.5745	0.49714	0.67632	0.5646	0.50685	0.75327	0.50844	0.5112	0.40275	0.37379	0.74621	0.78464	0.2249	0.47574	0.75165	0.63444	0.51065	0.45839	0.88447	0.55475	0.61957	0.33606	0.75186	0.47011	0.5433	0.73156	0.9856	0.61834	0.77272	0.64267	0.70438	0.5868	0.97353	0.11335	0.98674
REACTOME_PIP3_ACTIVATES_AKT_SIGNALING	0.49901	0.89365	0.82036	0.8111	0.69299	0.91876	0.99443	0.36626	0.6618	0.71562	0.25376	0.54475	0.77855	0.63212	0.56352	0.75856	0.38895	0.5609	0.50136	0.48695	0.29454	0.45641	0.45541	0.34691	0.28097	0.95625	0.84298	0.97088	0.80634	0.20336	0.53412	0.13921	0.41502	0.48007	0.24051	0.23632	0.28362	0.7919	0.44215	0.32531	0.57174	0.27212	0.15535	0.27051	0.08116	0.90673	0.96262	0.552	0.63587
BIOCARTA_HCMV_PATHWAY	0.499165	0.88848	0.6327	0.75168	0.86915	0.82231	0.0462	0.04973	0.2468	0.45608	0.59032	0.30173	0.77088	0.92424	0.36688	0.7013	0.75002	0.95331	0.18573	0.64723	0.32089	0.15267	0.01943	0.03505	0.11109	0.90375	0.72415	0.56768	0.55299	0.60569	0.08374	0.04386	0.3641	0.59864	0.45427	0.50316	0.63084	0.389	0.00661	0.16334	0.07905	0.38267	0.43754	0.38122	0.80853	0.97198	0.70203	0.83667	0.82469
KEGG_RNA_DEGRADATION	0.49941	0.10522	0.20806	0.12592	0.21827	0.16842	0.47238	0.74633	0.68395	0.0994	0.38932	0.45546	0.10824	0.38818	0.16288	0.41501	0.60022	0.91885	0.90722	0.84318	0.62925	0.33852	0.31511	0.60741	0.39804	0.29594	0.61738	0.1992	0.57576	0.64754	0.3301	0.60842	0.66298	0.30627	0.4763	0.68992	0.28519	0.59297	0.66984	0.91846	0.55426	0.74334	0.81112	0.83672	0.7153	0.1132	0.40316	0.77585	0.46898
REACTOME_PHASE_II_CONJUGATION	0.500285	0.51294	0.94252	0.32839	0.63043	0.98965	0.79859	0.36708	0.81645	0.07675	0.11702	0.1433	0.60213	0.97348	0.87394	0.98483	0.54599	0.4768	0.23833	0.22316	0.3986	0.07121	0.17874	0.10091	0.16134	0.54709	0.66351	0.27897	0.66864	0.56304	0.38413	0.07362	0.50316	0.10201	0.20475	0.22426	0.53693	0.95188	0.61992	0.78361	0.39617	0.03566	0.16548	0.26121	0.01328	0.99888	0.57224	0.90999	0.78675
KEGG_LYSOSOME	0.50046	0.51605	0.21375	0.1375	0.57693	0.20612	0.24248	0.64283	0.7049	0.45811	0.36828	0.6554	0.08257	0.31592	0.70585	0.20756	0.77442	0.08562	0.03448	0.04479	0.48987	0.48142	0.28746	0.71437	0.71328	0.38612	0.52372	0.86432	0.49591	0.61073	0.80909	0.54354	0.83486	0.4351	0.43379	0.42943	0.35919	0.12495	0.31536	0.56492	0.36568	0.75064	0.7685	0.75285	0.76995	0.29652	0.24808	0.2081	0.58658
BIOCARTA_IL2_PATHWAY	0.500655	0.19575	0.27751	0.49919	0.09246	0.0774	0.05209	0.01437	0.037	0.42733	0.68335	0.49092	0.81443	0.15537	0.13069	0.46065	0.14068	0.68047	0.58163	0.86099	0.1512	0.04327	0.18755	0.09205	0.08239	0.31633	0.09617	0.2203	0.07794	0.06329	0.10353	0.0666	0.13176	0.4039	0.51821	0.66592	0.26078	0.28659	0.90122	0.95873	0.25131	0.67284	0.79061	0.84157	0.76804	0.07398	0.48401	0.28723	0.56662
REACTOME_TRANSMEMBRANE_TRANSPORT_OF_SMALL_MOLECULES	0.50092	0.68103	0.98107	0.79541	0.77864	0.91908	0.43298	0.66908	0.69575	0.78228	0.4552	0.64692	0.8792	0.55822	0.67274	0.78497	0.59671	0.87119	0.87908	0.92173	0.68704	0.41602	0.25793	0.4156	0.42307	0.04888	0.57731	0.02921	0.47049	0.3635	0.45277	0.68747	0.50001	0.61777	0.926	0.55154	0.97007	0.75376	0.84809	0.41953	0.93889	0.34123	0.2529	0.30254	0.20821	0.92754	0.94724	0.97274	0.82176
REACTOME_MEMBRANE_TRAFFICKING	0.501265	0.07254	0.27182	0.06154	0.57746	0.66628	0.4126	0.92752	0.70337	0.20932	0.62131	0.10948	0.01482	0.55375	0.52132	0.58635	0.70639	0.23948	0.42273	0.15836	0.38381	0.30514	0.50777	0.29079	0.1954	0.0405	0.59745	0.54086	0.07364	0.65599	0.58491	0.68379	0.45709	0.19958	0.15565	0.23775	0.46804	0.58106	0.4675	0.98868	0.58516	0.16226	0.46316	0.19449	0.38892	0.83779	0.36007	0.42765	0.70538
REACTOME_RETROGRADE_NEUROTROPHIN_SIGNALLING	0.501435	0.76782	0.92129	0.69021	0.84065	0.9497	0.98572	0.52101	0.83196	0.91115	0.96134	0.95145	0.06783	0.91219	0.87917	0.70071	0.89873	0.0711	0.09869	0.02204	0.65483	0.7794	0.70869	0.97659	0.97701	0.27434	0.67283	0.46001	0.75833	0.65749	0.98722	0.91752	0.96935	0.82855	0.72952	0.87755	0.54024	0.44828	0.31384	0.71006	0.52951	0.56657	0.70921	0.68395	0.37063	0.52782	0.06654	0.57091	0.49547
REACTOME_CELL_CYCLE	0.50171	0.56639	0.0898	0.44222	0.32372	0.33091	0.18518	0.20266	0.67301	0.50061	0.55675	0.39216	0.81543	0.31447	0.32917	0.15784	0.45839	0.61373	0.30094	0.37908	0.33903	0.42308	0.47748	0.0827	0.29066	0.60601	0.26698	0.8354	0.50373	0.55346	0.31205	0.18751	0.38912	0.61137	0.50502	0.33575	0.87271	0.71055	0.75875	0.87123	0.91075	0.47935	0.50801	0.48263	0.43707	0.49142	0.79953	0.07786	0.81118
KEGG_FC_EPSILON_RI_SIGNALING_PATHWAY	0.502835	0.82049	0.85326	0.58029	0.97097	0.90773	0.06423	0.2145	0.51259	0.53055	0.25556	0.29609	0.47392	0.9292	0.53945	0.79566	0.84928	0.81003	0.48818	0.80234	0.63282	0.1076	0.09501	0.12627	0.23342	0.19547	0.36045	0.29991	0.11416	0.42148	0.33367	0.19031	0.46312	0.60859	0.3405	0.13325	0.81698	0.2309	0.04201	0.33298	0.09729	0.32206	0.66622	0.45643	0.52776	0.73497	0.24448	0.15829	0.95352
KEGG_NOTCH_SIGNALING_PATHWAY	0.502885	0.03549	0.62519	0.05441	0.41703	0.71733	0.8111	0.40741	0.34488	0.05207	0.19838	0.0953	0.40724	0.48257	0.48336	0.48388	0.40199	0.08204	0.39599	0.38691	0.2056	0.50701	0.59427	0.56152	0.26566	0.31933	0.64793	0.51073	0.83263	0.33188	0.16542	0.20283	0.24162	0.13109	0.42514	0.18293	0.50031	0.52415	0.43964	0.43716	0.45695	0.07898	0.29969	0.23576	0.11521	0.96284	0.41251	0.65203	0.55622
REACTOME_REVERSIBLE_HYDRATION_OF_CARBON_DIOXIDE	0.50329	0.37313	0.70162	0.93994	0.09031	0.87481	0.51496	0.49283	0.78327	0.64065	0.82754	0.72225	0.95247	0.28506	0.14912	0.80956	0.22107	0.44668	0.41883	0.09361	0.69237	0.34076	0.05755	0.06856	0.26765	0.53151	0.18256	0.50858	0.48971	0.63247	0.21806	0.28863	0.36129	0.60634	0.82581	0.8605	0.39335	0.73612	0.69274	0.25175	0.1679	0.68619	0.32918	0.51128	0.29521	0.35815	0.03348	0.84173	0.05642
BIOCARTA_TGFB_PATHWAY	0.50331	0.65737	0.39203	0.59684	0.65858	0.30669	0.63257	0.0964	0.40356	0.67414	0.84825	0.58598	0.40213	0.4746	0.58961	0.20737	0.69609	0.14648	0.1489	0.17665	0.25009	0.91585	0.64637	0.55767	0.68462	0.80131	0.84073	0.67959	0.23513	0.59145	0.70273	0.39614	0.58378	0.13617	0.06861	0.15462	0.01898	0.04218	0.26182	0.35361	0.27967	0.10533	0.39441	0.28234	0.26168	0.06776	0.46417	0.30639	0.38509
REACTOME_GOLGI_ASSOCIATED_VESICLE_BIOGENESIS	0.505825	0.07186	0.09152	0.07464	0.32307	0.22319	0.047	0.77709	0.29461	0.16152	0.25987	0.08211	0.14384	0.23391	0.21294	0.26426	0.56187	0.4196	0.42141	0.42121	0.34249	0.21267	0.34004	0.18126	0.12177	0.36231	0.71659	0.51463	0.52102	0.38054	0.20015	0.48156	0.31844	0.37058	0.382	0.42608	0.49445	0.53582	0.69998	0.88566	0.35453	0.42445	0.53323	0.29362	0.5594	0.47634	0.29566	0.53068	0.37179
KEGG_FOLATE_BIOSYNTHESIS	0.50609	0.30923	0.07176	0.33157	0.01587	0.0902	0.22782	0.87108	0.05854	0.12506	0.07026	0.14108	0.64819	0.09657	0.0526	0.57787	0.01523	0.97442	0.67673	0.65856	0.61062	0.94905	0.98367	0.87688	0.61236	0.94145	0.84658	0.86787	0.77982	0.59111	0.73069	0.95736	0.22792	0.11117	0.06668	0.18218	0.01709	0.16629	0.14883	0.64498	0.08094	0.20115	0.16271	0.26029	0.24408	0.03093	0.02654	0.14552	0.02152
REACTOME_REGULATION_OF_GENE_EXPRESSION_IN_BETA_CELLS	0.506205	0.36834	0.50929	0.9572	0.2508	0.34089	0.25803	0.18753	0.71331	0.84573	0.95763	0.95642	0.17973	0.14615	0.19266	0.13137	0.52431	0.22474	0.36912	0.22453	0.34339	0.25256	0.18424	0.1006	0.47215	0.09416	0.2202	0.08125	0.05563	0.15967	0.26104	0.24711	0.43428	0.78728	0.70767	0.78786	0.70813	0.62142	0.38232	0.16265	0.12065	0.70686	0.39181	0.8261	0.452	0.1963	0.63398	0.52805	0.49604
REACTOME_MEIOTIC_SYNAPSIS	0.507585	0.45299	0.29391	0.30229	0.3711	0.68544	0.41053	0.42292	0.37801	0.36688	0.36543	0.46234	0.57991	0.60687	0.48214	0.57538	0.5437	0.60891	0.23398	0.22598	0.46001	0.48072	0.45122	0.15443	0.23714	0.49016	0.62694	0.81465	0.69469	0.56268	0.18348	0.20965	0.38602	0.59744	0.87181	0.583	0.60979	0.66234	0.59901	0.22214	0.29684	0.45323	0.60037	0.39587	0.49425	0.8662	0.54302	0.83293	0.43778
REACTOME_TRANSPORT_OF_RIBONUCLEOPROTEINS_INTO_THE_HOST_NUCLEUS	0.50849	0.90693	0.60118	0.62339	0.6419	0.50592	0.49218	0.58335	0.91051	0.78635	0.6587	0.52371	0.99219	0.47307	0.74265	0.25609	0.68009	0.37764	0.52786	0.37324	0.51628	0.22598	0.15171	0.28734	0.22133	0.55883	0.29382	0.7068	0.56635	0.31398	0.37357	0.21952	0.53252	0.39348	0.62252	0.5424	0.74522	0.40236	0.69389	0.52557	0.52831	0.4552	0.43321	0.6659	0.13344	0.53584	0.55077	0.81696	0.78614
REACTOME_TIGHT_JUNCTION_INTERACTIONS	0.50862	0.68268	0.94271	0.51717	0.83976	0.84481	0.55086	0.60561	0.28767	0.55013	0.15541	0.21387	0.65653	0.70319	0.31363	0.90163	0.21623	0.81688	0.64376	0.83461	0.18846	0.09381	0.50073	0.40247	0.184	0.62185	0.49229	0.25923	0.6602	0.24481	0.13822	0.21466	0.17721	0.47786	0.38702	0.2251	0.511	0.23606	0.48785	0.49332	0.47188	0.36287	0.43778	0.16869	0.36971	0.54135	0.25316	0.49249	0.33774
REACTOME_PACKAGING_OF_TELOMERE_ENDS	0.509105	0.89848	0.35526	0.83475	0.30177	0.53211	0.10966	0.17478	0.03678	0.9295	0.99884	0.97681	0.59414	0.37078	0.04819	0.55261	0.06493	0.8874	0.28411	0.2875	0.27652	0.18906	0.48239	0.21091	0.24843	0.33291	0.68877	0.54408	0.98152	0.23035	0.05725	0.18335	0.07773	0.81273	0.79871	0.79913	0.45101	0.7821	0.61721	0.75086	0.37802	0.71799	0.839	0.73214	0.83776	0.65992	0.5414	0.90576	0.09937
BIOCARTA_HIF_PATHWAY	0.50967	0.01045	0.39938	0.33585	0.1392	0.77492	0.39309	0.55317	0.84499	0.36104	0.69264	0.55533	0.32219	0.60605	0.94356	0.94211	0.85026	0.77379	0.84866	0.82689	0.92792	0.32386	0.06893	0.09679	0.17807	0.55101	0.75968	0.75382	0.61646	0.92402	0.28821	0.29892	0.61939	0.33655	0.3121	0.43709	0.3683	0.11974	0.49636	0.10894	0.21136	0.5033	0.63289	0.34016	0.5081	0.49845	0.27713	0.02491	0.65969
REACTOME_IMMUNOREGULATORY_INTERACTIONS_BETWEEN_A_LYMPHOID_AND_A_NON_LYMPHOID_CELL	0.50968	0.46022	0.65008	0.71766	0.22431	0.75338	0.38248	0.25614	0.28916	0.52564	0.29666	0.29875	0.54088	0.35225	0.30454	0.92867	0.05676	0.98265	0.58463	0.56573	0.45574	0.8196	0.80003	0.38281	0.58081	0.78076	0.32401	0.73136	0.62526	0.45364	0.36462	0.52596	0.15958	0.44841	0.52373	0.41157	0.38492	0.46833	0.23449	0.58671	0.57868	0.37666	0.49743	0.2237	0.15458	0.70181	0.31013	0.36344	0.15376
REACTOME_INHIBITION_OF_REPLICATION_INITIATION_OF_DAMAGED_DNA_BY_RB1_E2F1	0.51172	0.34899	0.42184	0.61349	0.21717	0.58445	0.89591	0.36209	0.34098	0.14655	0.12492	0.18376	0.54573	0.50437	0.56986	0.76926	0.4204	0.2072	0.03967	0.11248	0.13929	0.30046	0.242	0.2765	0.36178	0.98939	0.97744	0.93138	0.9905	0.26903	0.52336	0.05369	0.48473	0.35813	0.15946	0.53298	0.20008	0.5805	0.14037	0.40908	0.20285	0.4542	0.26456	0.40669	0.34744	0.39542	0.33912	0.48545	0.37579
REACTOME_NEURONAL_SYSTEM	0.51188	0.51818	0.84035	0.63141	0.88947	0.63542	0.16003	0.15474	0.16838	0.73924	0.19897	0.34671	0.62913	0.95178	0.1936	0.95505	0.25552	0.32228	0.79269	0.57863	0.29857	0.10141	0.18843	0.37825	0.38465	0.67007	0.9961	0.86532	0.95776	0.18178	0.34155	0.41349	0.34314	0.77837	0.53743	0.78258	0.17376	0.38975	0.03625	0.01478	0.01463	0.50853	0.16255	0.4002	0.36952	0.21247	0.00698	0.57188	0.09323
BIOCARTA_CTCF_PATHWAY	0.51284	0.95862	0.88998	0.96059	0.56088	0.9745	0.66982	0.23329	0.98124	0.85639	0.49177	0.43996	0.87757	0.84388	0.8059	0.87018	0.54901	0.62618	0.14242	0.08785	0.8867	0.74551	0.07764	0.8346	0.9442	0.9519	0.89398	0.9569	0.89436	0.99603	0.9776	0.58092	0.99922	0.14547	0.09319	0.4086	0.04613	0.26704	0.03332	0.21034	0.4541	0.14522	0.26913	0.20359	0.19669	0.47976	0.47306	0.52964	0.59237
REACTOME_PYRUVATE_METABOLISM_AND_CITRIC_ACID_TCA_CYCLE	0.51327	0.41806	0.49627	0.55097	0.51439	0.34934	0.79935	0.51859	0.84419	0.82691	0.67502	0.83836	0.26147	0.7647	0.38142	0.51402	0.67201	0.06767	0.10236	0.03708	0.13583	0.01816	0.02909	0.58848	0.22945	0.55213	0.58217	0.45485	0.12704	0.62111	0.65888	0.11671	0.77592	0.87213	0.92554	0.92097	0.9098	0.61693	0.96236	0.98751	0.93804	0.94171	0.95287	0.95547	0.83859	0.65284	0.80408	0.08682	0.70719
REACTOME_E2F_ENABLED_INHIBITION_OF_PRE_REPLICATION_COMPLEX_FORMATION	0.51411	0.53029	0.69959	0.75538	0.43908	0.63616	0.46492	0.45201	0.20837	0.62559	0.66536	0.64733	0.17725	0.77037	0.25849	0.60094	0.38036	0.87862	0.81623	0.85622	0.31544	0.36991	0.36009	0.29832	0.18208	0.0407	0.58906	0.64224	0.59347	0.22032	0.21079	0.23054	0.18569	0.38792	0.57652	0.1617	0.92437	0.82422	0.88337	0.76557	0.95809	0.1622	0.3183	0.22078	0.24223	0.87762	0.84946	0.3585	0.80379
REACTOME_ORGANIC_CATION_ANION_ZWITTERION_TRANSPORT	0.514115	0.7738	0.35321	0.77192	0.19302	0.32572	0.63702	0.34673	0.19346	0.72001	0.84311	0.72702	0.84905	0.03352	0.08742	0.15724	0.04958	0.37881	0.26129	0.30658	0.25539	0.77479	0.21971	0.34698	0.30526	0.79251	0.63182	0.67406	0.4559	0.14547	0.32679	0.50229	0.21655	0.77739	0.45206	0.59302	0.55615	0.50155	0.65806	0.43249	0.40651	0.8388	0.548	0.80649	0.90052	0.48407	0.63372	0.81071	0.25636
REACTOME_ACTIVATION_OF_BH3_ONLY_PROTEINS	0.515045	0.20463	0.56843	0.12279	0.70588	0.85955	0.59085	0.40975	0.89422	0.02892	0.02728	0.04074	0.59355	0.90455	0.75819	0.66971	0.75566	0.49433	0.13515	0.26593	0.30232	0.57056	0.25716	0.82963	0.43815	0.77765	0.98979	0.8615	0.98526	0.65984	0.73323	0.17127	0.86491	0.24643	0.33058	0.44834	0.51468	0.62587	0.27915	0.67543	0.89976	0.36813	0.22328	0.18813	0.20571	0.92619	0.75303	0.97799	0.8364
BIOCARTA_RARRXR_PATHWAY	0.51506	0.76812	0.61034	0.48446	0.65427	0.80662	0.8092	0.94756	0.92841	0.41805	0.40157	0.09337	0.66244	0.84947	0.74758	0.95175	0.4547	0.60734	0.38186	0.20627	0.58203	0.8885	0.8862	0.93951	0.77435	0.54478	0.48754	0.59011	0.61795	0.73481	0.942	0.8356	0.85689	0.05879	0.03676	0.03719	0.1306	0.28955	0.45557	0.49237	0.87163	0.05471	0.20863	0.07875	0.11771	0.50389	0.39379	0.33878	0.64163
REACTOME_AMINO_ACID_TRANSPORT_ACROSS_THE_PLASMA_MEMBRANE	0.515325	0.33736	0.78604	0.16826	0.7559	0.91011	0.87981	0.15436	0.95349	0.2356	0.29475	0.1556	0.26131	0.85433	0.74629	0.94529	0.88121	0.87992	0.83547	0.51507	0.65287	0.80005	0.81288	0.36433	0.25348	0.26106	0.39914	0.03409	0.40273	0.63447	0.61296	0.67108	0.4576	0.1623	0.17929	0.22842	0.3314	0.49181	0.56229	0.79112	0.70279	0.09311	0.42048	0.21108	0.39099	0.54762	0.17491	0.34457	0.61754
BIOCARTA_ATRBRCA_PATHWAY	0.51567	0.57293	0.29491	0.42271	0.2896	0.75672	0.94262	0.08524	0.29438	0.18714	0.1817	0.1584	0.88958	0.80276	0.64856	0.90939	0.1113	0.96689	0.62184	0.34481	0.34562	0.90331	0.37042	0.24894	0.14856	0.89985	0.73245	0.97631	0.57723	0.50592	0.21102	0.18531	0.04886	0.15807	0.08089	0.15618	0.10871	0.28308	0.87978	0.82484	0.48727	0.21862	0.42908	0.16618	0.4614	0.41471	0.91422	0.51538	0.15031
REACTOME_PERK_REGULATED_GENE_EXPRESSION	0.515675	0.60751	0.37027	0.58385	0.59756	0.76425	0.83201	0.80861	0.83528	0.16444	0.16989	0.53971	0.77356	0.92323	0.8486	0.94315	0.73175	0.86004	0.65051	0.4474	0.43374	0.91588	0.51404	0.35543	0.2001	0.38047	0.28619	0.23631	0.41991	0.67016	0.24836	0.31316	0.30117	0.27658	0.18073	0.48261	0.2798	0.49265	0.59771	0.89501	0.87846	0.26297	0.22666	0.40715	0.10301	0.52229	0.6868	0.40431	0.77324
KEGG_ARGININE_AND_PROLINE_METABOLISM	0.51588	0.77343	0.36681	0.80242	0.15895	0.263	0.66536	0.26826	0.5496	0.70086	0.21972	0.49165	0.94022	0.18052	0.28821	0.11054	0.39667	0.5218	0.80383	0.87108	0.61012	0.76484	0.89028	0.97981	0.88804	0.75773	0.19537	0.69982	0.68423	0.37066	0.86116	0.65639	0.75943	0.3111	0.22093	0.29966	0.18452	0.03937	0.05773	0.11102	0.30213	0.17129	0.0866	0.15135	0.21097	0.09693	0.29864	0.09696	0.52914
BIOCARTA_ARF_PATHWAY	0.516465	0.4904	0.48423	0.43377	0.51256	0.8864	0.61641	0.16106	0.8184	0.02942	0.00411	0.01228	0.54013	0.90069	0.64192	0.77661	0.66402	0.94427	0.18213	0.21873	0.58549	0.39862	0.02786	0.3248	0.36197	0.63405	0.91197	0.60606	0.61083	0.69585	0.40017	0.10911	0.57852	0.08738	0.039	0.41028	0.02306	0.14449	0.00667	0.22033	0.14776	0.08615	0.02058	0.03648	0.03618	0.25467	0.18272	0.22517	0.34009
KEGG_TIGHT_JUNCTION	0.516955	0.87444	0.94895	0.48813	0.95876	0.51136	0.21448	0.50822	0.2494	0.3039	0.09984	0.05917	0.72358	0.50987	0.4601	0.28434	0.49869	0.09716	0.14465	0.74587	0.04843	0.11264	0.50051	0.97435	0.39945	0.77022	0.84382	0.39791	0.60323	0.04044	0.58363	0.11772	0.47446	0.68587	0.77834	0.30676	0.95099	0.50695	0.35772	0.62859	0.96362	0.26777	0.36942	0.068	0.33057	0.84369	0.85119	0.60663	0.79959
REACTOME_INTERACTION_BETWEEN_L1_AND_ANKYRINS	0.517675	0.79088	0.85153	0.41338	0.94375	0.86268	0.38721	0.80367	0.96885	0.49463	0.2715	0.25992	0.03879	0.98909	0.94514	0.62018	0.98727	0.4355	0.32761	0.20564	0.92387	0.29302	0.74516	0.5253	0.66973	0.76472	0.21708	0.73546	0.19213	0.64913	0.75956	0.37708	0.72868	0.44051	0.27954	0.18896	0.20681	0.02602	0.48106	0.87912	0.10058	0.53369	0.81691	0.81321	0.62127	0.04567	0.30589	0.01443	0.31137
BIOCARTA_GLEEVEC_PATHWAY	0.517835	0.56042	0.52025	0.4192	0.55017	0.46556	0.0853	0.04088	0.11568	0.41214	0.56619	0.22891	0.54453	0.66527	0.26194	0.61015	0.37256	0.78861	0.33269	0.64002	0.24487	0.30246	0.12922	0.24845	0.27245	0.75759	0.52189	0.58496	0.32526	0.26794	0.17398	0.11971	0.29753	0.38395	0.38096	0.21634	0.35169	0.17083	0.41733	0.57254	0.17712	0.4352	0.5441	0.33329	0.72737	0.52017	0.60182	0.42686	0.692
BIOCARTA_CTL_PATHWAY	0.517885	0.63807	0.83186	0.33829	0.65589	0.87098	0.59909	0.28352	0.29149	0.74011	0.78411	0.60109	0.44819	0.84284	0.30552	0.92951	0.10913	0.89107	0.78072	0.51494	0.87278	0.62091	0.57186	0.1705	0.26103	0.75444	0.97895	0.89501	0.85176	0.70554	0.0958	0.70871	0.05887	0.76797	0.72007	0.51858	0.48513	0.74973	0.10734	0.43909	0.01372	0.72665	0.87708	0.46339	0.67175	0.77795	0.04018	0.30174	0.02079
[truncated: 448 more rows]
[truncated: 208 more columns]

## Sheet: Table S7
Table S7. Number of associated cfDNA motifs for each pathway in the pathway-based analysis
Pathway	Freq
BIOCARTA_SET_PATHWAY	80
BIOCARTA_DNAFRAGMENT_PATHWAY	75
REACTOME_APOPTOSIS_INDUCED_DNA_FRAGMENTATION	62
BIOCARTA_MITOCHONDRIA_PATHWAY	42
BIOCARTA_GRANULOCYTES_PATHWAY	26
BIOCARTA_CASPASE_PATHWAY	25
BIOCARTA_FAS_PATHWAY	24
REACTOME_THE_NLRP3_INFLAMMASOME	19
REACTOME_INFLAMMASOMES	18
BIOCARTA_IL17_PATHWAY	17
[truncated: 91 more rows]

## Sheet: Table S8
Table S8. Results for genetic correlation analysis
[truncated: 17,465 more rows]

[truncated: 5 more sheets: Table S9, Table S10, Table S11, Table S12, Table S13]
